# Supplementary material for: A review of rate control in atrial fibrillation, and the rationale and protocol for the RATE-AF trial
Source: PubMed Central journal article supplement (PMC5588987; doi:10.1136/bmjopen-2016-015099), 2017-07-20
Supplement: bmjopen-2016-015099.draft_revisions.pdf [file bmjopen-2016-015099.draft_revisions.pdf]

# BMJ Open

## A review of rate control in atrial fibrillation and rationale for the RATE-AF trial

|                                 |                                                                                                                                                                                                                                                                                                                                                                                                                                                                                                                                                                                                                                                                                                                                                                                                                                                                                                                                                                                                                                                                                                                                                                                                                                                                                                                                                                                                                                                                 |
|---------------------------------|-----------------------------------------------------------------------------------------------------------------------------------------------------------------------------------------------------------------------------------------------------------------------------------------------------------------------------------------------------------------------------------------------------------------------------------------------------------------------------------------------------------------------------------------------------------------------------------------------------------------------------------------------------------------------------------------------------------------------------------------------------------------------------------------------------------------------------------------------------------------------------------------------------------------------------------------------------------------------------------------------------------------------------------------------------------------------------------------------------------------------------------------------------------------------------------------------------------------------------------------------------------------------------------------------------------------------------------------------------------------------------------------------------------------------------------------------------------------|
| Journal:                        | <i>BMJ Open</i>                                                                                                                                                                                                                                                                                                                                                                                                                                                                                                                                                                                                                                                                                                                                                                                                                                                                                                                                                                                                                                                                                                                                                                                                                                                                                                                                                                                                                                                 |
| Manuscript ID                   | bmjopen-2016-015099                                                                                                                                                                                                                                                                                                                                                                                                                                                                                                                                                                                                                                                                                                                                                                                                                                                                                                                                                                                                                                                                                                                                                                                                                                                                                                                                                                                                                                             |
| Article Type:                   | Protocol                                                                                                                                                                                                                                                                                                                                                                                                                                                                                                                                                                                                                                                                                                                                                                                                                                                                                                                                                                                                                                                                                                                                                                                                                                                                                                                                                                                                                                                        |
| Date Submitted by the Author:   | 29-Nov-2016                                                                                                                                                                                                                                                                                                                                                                                                                                                                                                                                                                                                                                                                                                                                                                                                                                                                                                                                                                                                                                                                                                                                                                                                                                                                                                                                                                                                                                                     |
| Complete List of Authors:       | <p>Kotecha, Dipak; University of Birmingham, Institute of Cardiovascular Sciences; University Hospitals Birmingham NHS Trust, Cardiology<br/>           Calvert, Melanie; University of Birmingham, Centre for Patient Reported Outcomes Research; University of Birmingham, Institute of Applied Health Research<br/>           Deeks, Jon; University of Birmingham, Birmingham Clinical Trials Unit; University of Birmingham, Institute of Applied Health Research<br/>           Griffith, Mike; University Hospitals Birmingham NHS Trust, Cardiology<br/>           Kirchhof, Paulus; University of Birmingham, Institute of Cardiovascular Sciences; Sandwell &amp; West Birmingham Hospitals NHS Trust, Cardiology<br/>           Lip, Gregory; University of Birmingham, Institute of Cardiovascular Sciences; Sandwell &amp; West Birmingham Hospitals NHS Trust, Cardiology<br/>           Mehta, Samir; University of Birmingham, Birmingham Clinical Trials Unit<br/>           Slinn, Gemma; University of Birmingham, Birmingham Clinical Trials Unit<br/>           Stanbury, Mary; (Lead for the patient involvement panel)<br/>           Steeds, Richard; University Hospitals Birmingham NHS Trust, Cardiology; University of Birmingham, Institute of Cardiovascular Sciences<br/>           Townend, Jonathan; University Hospitals Birmingham NHS Trust, Cardiology; University of Birmingham, Institute of Cardiovascular Sciences</p> |
| <b>Primary Subject Heading</b>: | Cardiovascular medicine                                                                                                                                                                                                                                                                                                                                                                                                                                                                                                                                                                                                                                                                                                                                                                                                                                                                                                                                                                                                                                                                                                                                                                                                                                                                                                                                                                                                                                         |
| Secondary Subject Heading:      | Evidence based practice, Medical management, Patient-centred medicine                                                                                                                                                                                                                                                                                                                                                                                                                                                                                                                                                                                                                                                                                                                                                                                                                                                                                                                                                                                                                                                                                                                                                                                                                                                                                                                                                                                           |
| Keywords:                       | Atrial fibrillation, heart rate, RATE-AF trial, quality of life, Echocardiography < CARDIOLOGY, Protocols & guidelines < HEALTH SERVICES ADMINISTRATION & MANAGEMENT                                                                                                                                                                                                                                                                                                                                                                                                                                                                                                                                                                                                                                                                                                                                                                                                                                                                                                                                                                                                                                                                                                                                                                                                                                                                                            |
|                                 |                                                                                                                                                                                                                                                                                                                                                                                                                                                                                                                                                                                                                                                                                                                                                                                                                                                                                                                                                                                                                                                                                                                                                                                                                                                                                                                                                                                                                                                                 |

SCHOLARONE™  
Manuscripts

1  
2  
3  
4  
5  
6  
7  
8  
9  
10  
11  
12  
13  
14  
15  
16  
17  
18  
19  
20  
21  
22  
23  
24  
25  
26  
27  
28  
29  
30  
31  
32  
33  
34  
35  
36  
37  
38  
39  
40  
41  
42  
43  
44  
45  
46  
47  
48  
49  
50  
51  
52  
53  
54  
55  
56  
57  
58  
59  
60

**Title: A review of rate control in atrial fibrillation  
and rationale for the RATE-AF trial**

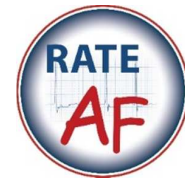

Brief Title: Kotecha *et al*, Rate control therapy evaluation in atrial fibrillation

Authors: Dr Dipak Kotecha MBChB PhD MRCP FESC FHEA<sup>1,2,3,4\*</sup>, Prof Melanie Calvert BSc PhD FHEA<sup>4,5</sup>, Prof Jonathan J Deeks BSc MSc PhD CStat<sup>5,6</sup>, Dr Michael Griffith MD FRCP<sup>2</sup>, Prof Paulus Kirchhof MD FRCP FESC<sup>1,2,3,4</sup>, Prof Gregory YH Lip MD FRCP DFM FESC<sup>1,3,4</sup>, Samir Mehta MSc BSc<sup>6</sup>, Gemma Slinn BSc MPhil<sup>6</sup>, Mary Stanbury RGN RDN RHV\*\*, Dr Richard P Steeds MA MD FRCP FESC<sup>1,2</sup> and Prof Jonathan N Townend BSc MBChB MD FESC<sup>1,2</sup>.

From the (1) Institute of Cardiovascular Sciences, University of Birmingham, Birmingham, UK; (2) University Hospitals Birmingham NHS Trust, Birmingham, UK; (3) Sandwell & West Birmingham Hospitals NHS Trust, Birmingham, UK; (4) Centre for Patient Reported Outcomes Research, University of Birmingham, Birmingham, UK; (5) Institute of Applied Health Research, University of Birmingham, Birmingham, UK; and (6) Birmingham Clinical Trials Unit, University of Birmingham, Birmingham, UK. \* Authors after the Chief Investigator listed in alphabetical order. \*\* Lead for the Patient Involvement Panel.

Address for correspondence:

Dr Dipak Kotecha

University of Birmingham Institute of Cardiovascular Sciences, Institute of Translational Medicine, Heritage Building, Queen Elizabeth Hospital Birmingham, B15 2TH, UK.

Email: [d.kotecha@bham.ac.uk](mailto:d.kotecha@bham.ac.uk) Tel: +44 121 371 8122 Fax: +44 121 554 4083

Word count (text): 2740

Word count (abstract): 296

**Key Words:** Atrial fibrillation; heart rate; Protocols & guidelines<health services administration & management; RATE-AF trial; quality of life; echocardiography<cardiology.

## Abstract

**Background & Objective:** Atrial fibrillation (AF) is common and causes impaired quality of life, an increased risk of stroke and death, as well as frequent hospital admissions. The majority of patients with AF require control of heart rate. In this article we summarise the limited evidence from clinical trials that guides prescription, and present the rationale and protocol for a new randomised trial. As rate control has not, as yet, been shown to reduce mortality, there is a clear need to compare the impact of therapy on quality of life, cardiac function and exercise capacity. Such a trial should concentrate on the longer-term effects of treatment in the largest proportion of AF patients, those with symptomatic permanent AF, with the aim of improving patient well-being.

**Design & Intervention:** The RAte control Therapy Evaluation in permanent Atrial Fibrillation (RATE-AF) trial will enrol 160 participants with a prospective, randomised, open-label, blinded end-point design comparing initial rate control with digoxin or bisoprolol. This will be the first head-to-head randomised trial of digoxin and beta-blockers in AF.

**Participants:** Recruited patients will be aged  $\geq 60$  years with permanent AF and symptoms of breathlessness (NYHA Class II or above), with few exclusion criteria to maximise generalisability to routine clinical practice.

**Outcome measures:** The primary outcome is patient-reported quality of life, with secondary outcomes including ventricular function using echocardiography, exercise capacity and surrogate biomarkers of cellular and clinical response. Follow-up will occur at 6 and 12 months, with feasibility components to inform the design of a future trial powered to detect a difference in hospital admission. The RATE-AF trial will underpin an integrated approach to management including biomarkers, function and symptoms that will guide future research into optimal, personalised rate control in patients with AF.

**Trial registration:** clinicaltrials.gov NCT02391337; EudraCT 2015-005043-13; ISRCTN 95259705.

## Strengths and limitations of this study

- Control of heart rate is universally used in patients with atrial fibrillation, but evidence from good quality randomised trials is extremely limited.
- Despite common clinical use, there has never been a direct randomised comparison of beta-blockers and digoxin for heart rate control in AF patients (with or without heart failure).
- The RATE-AF trial will assess the effect of therapy on patient-reported quality of life, and improve methods to capture this information in patients with AF. The trial will also evaluate the longer-term impact on cardiac function, define reproducible methods to measure systolic and diastolic function in AF, and develop new biomarkers for personalisation of treatment.
- The trial will not have the power to identify differences in clinical events, but will allow us to plan a future trial designed to detect a difference in the need for admissions to hospital.

## Introduction

Atrial fibrillation (AF) is a common cause of stroke and cardiovascular death, leads to poor quality of life and doubles the risk of hospital admission.<sup>1</sup> We are currently in the midst of an epidemic of AF, with both incidence and prevalence expected to double in the next 20 years.<sup>2,3</sup> Although AF can affect any age-group, patients are typically elderly with significant comorbidities, including up to 50% suffering from heart failure.<sup>4</sup> AF is both a cause and consequence of heart failure, with complex interactions leading to impairment of systolic and diastolic function.<sup>5,6</sup> The combination of these two conditions is expected to have a dramatic impact on the burden of healthcare worldwide.<sup>7-10</sup>

Management of AF involves anticoagulation to prevent strokes, selecting appropriate patients for restoration of sinus rhythm and almost universal need for control of heart rate. In contrast to other management strategies, the choice of rate control therapy has a very low-quality evidence-base (**Figure 1**).<sup>11</sup> Guidelines from the National Institute for Health and Care Excellence (NICE) and the European Society of Cardiology (ESC) have mandated further research specifically on rate control<sup>1,12</sup>, which is also reflected in the level of recommendations from the American Heart Association.<sup>13</sup> The small studies currently available are often uncontrolled or with short follow-up<sup>14-18</sup>, providing few insights on the biological effects of treatment or the mechanisms underpinning the response to therapy. With no evidence for any impact of rate control on mortality<sup>19,20</sup>, and limited data for any difference in quality of life or functional outcomes, the choice of rate control agent is currently informed by expert consensus and physician experience.

In this paper, we review the current evidence-base for rate control in AF and the rationale for a new randomised controlled trial (RCT). The RAte control Therapy Evaluation in permanent Atrial Fibrillation (RATE-AF) trial will compare initial therapy with beta-blockers versus digoxin in older patients with symptomatic permanent AF, assessing quality of life, functional

1 capacity, left-ventricular ejection fraction (LVEF), diastolic function and biomarkers of  
2 treatment response.  
3  
4  
5  
6  
7  
8  
9

## 10 **Rationale for a new trial of rate control in AF**

### 11 **Why not choose a rhythm control strategy?**

12  
13  
14  
15  
16  
17 A number of RCTs have assessed the addition of rhythm control strategies to control of heart  
18 rate in AF patients, most often with anti-arrhythmic drugs (AAD) and direct current  
19 cardioversion. Neither of the two largest trials (AFFIRM or RACE) found any difference in  
20 mortality, incident stroke or thromboembolism between a rate or rhythm control strategy.<sup>21,22</sup>

21  
22 A number of meta-analyses have pooled these and other smaller trials and confirmed that  
23 rhythm control is not superior to regulation of heart rate alone,<sup>23-25</sup> including heart failure  
24 patients with both impaired and preserved ejection fraction.<sup>26,27</sup> It should be noted that these  
25 studies have analysed heterogeneous populations, including both paroxysmal and permanent  
26 AF that may differ with regards to mechanism, prognosis and the response to treatment.<sup>14</sup>

27  
28 However there is also evidence that a rhythm control strategy may increase hospital  
29 admissions. A meta-analysis of major published trials is presented in **Figure 2**, highlighting a  
30 17% increase in the risk of hospitalisation in the rhythm control group (after exclusion of  
31 hospital visits related to cardioversion). Although limited by patient crossover and the  
32 association that exists between AAD and adverse events,<sup>28</sup> the results highlight the importance  
33 of trials comparing different rate control options and associated healthcare costs.  
34  
35  
36  
37  
38  
39  
40  
41  
42  
43  
44  
45  
46  
47  
48  
49

50 Although AF ablation is becoming increasingly popular it remains a highly invasive  
51 method to restore sinus rhythm.<sup>29,30</sup> Current European and American guidelines recommend  
52 ablation to improve AF-related symptoms in patients with paroxysmal AF, or as a treatment  
53 option in symptomatic persistent AF that is refractory to other therapy.<sup>1,13</sup> Long-term outcome  
54  
55  
56  
57  
58  
59  
60

1 studies are still awaited and need to be balanced against procedural complications and AF  
2 recurrence. Even in patients receiving intensive rhythm control therapy, rate control is often  
3 necessary to reduce symptoms during AF paroxysms. Further, 40-50% of AF patients are  
4 deemed as unsuitable for rhythm control (permanent AF),<sup>4,31</sup> and are maintained on rate  
5 control therapy to reduce potential symptoms and avoid tachycardia that may worsen  
6 ventricular function.<sup>5</sup> Patients with permanent AF have a higher residual risk of cardiovascular  
7 death, stroke or systemic embolism, despite anticoagulation.<sup>32</sup>

### 19 **What is the optimal heart rate target in AF?**

20 There is clinical uncertainty about how to control heart rate and the intensity of rate-reduction.  
21 In the RACE II trial of 614 randomised patients with permanent AF, there were no benefits of  
22 strict (<80 bpm at rest) compared to lenient rate control (resting heart rate <110 bpm) over 3  
23 years of follow-up.<sup>33</sup> Lenient rate control was non-inferior with an adjusted hazard ratio of  
24 0.80 (90% CI 0.55-1.17) and cumulative adverse clinical outcomes in 12.9%, compared to  
25 14.9% in the strict control arm. In addition, there were no differences in symptoms or NYHA  
26 class,<sup>33,34</sup> with patients who achieved strict rate control requiring more clinic visits.<sup>35</sup> These  
27 findings are consistent with other trial data,<sup>36-38</sup> registries,<sup>31</sup> and even observational cohorts in  
28 patients with concomitant heart failure,<sup>39</sup> suggesting that intensity of heart rate control *per se* is  
29 not the key determinant of outcomes in AF.

### 46 **Do outcomes vary with different rate control therapies?**

47 Medical therapy to achieve rate control in AF can be achieved with beta-blockers, digoxin and  
48 non-dihydropyridine calcium channel blockers (CCB; diltiazem or verapamil).<sup>1</sup> However only  
49 a limited evidence-base is available to assist clinicians in choosing appropriate first-line and  
50 subsequent therapy. This results in wide variations in local clinical practice,<sup>40-42</sup> and the  
51 frequent use of combination therapy. Current European and American guidelines suggest the  
52  
53  
54  
55  
56  
57  
58  
59  
60

1 choice of medication should be individualised, with dose and use of combination therapy  
2  
3 dependent on the presence of ongoing symptoms.<sup>1, 13</sup> However, these recommendations are  
4  
5 based on low quality trials and observational data, often with small numbers of participants and  
6  
7 follow-up over a few weeks.<sup>15</sup> There are no current randomised trials comparing long-term  
8  
9 rate control options in AF.  
10  
11

12 Demonstrating any reduction in hard clinical outcomes with rate control has proved elusive. In  
13  
14 patients with heart failure, reduced ejection fraction and concomitant AF, an individual patient  
15  
16 level meta-analysis of all RCT data has shown that beta-blockers do not reduce all-cause  
17  
18 mortality or hospital admissions.<sup>19</sup> Similarly, after accounting for the fact that sicker patients  
19  
20 tend to receive digoxin more often, the use of digoxin was not associated with any increase, or  
21  
22 reduction, in mortality in a comprehensive systematic review.<sup>20</sup> Although digoxin is known to  
23  
24 reduce hospital admissions in patients with heart failure and reduced ejection fraction in sinus  
25  
26 rhythm<sup>43</sup>, the impact in patients with AF is unknown.  
27  
28  
29  
30  
31  
32

33 If rate control has limited effect on mortality, what about evidence for a differential effect on  
34  
35 other outcomes, such as functional capacity, cardiac function or quality of life? Beta-blockers  
36  
37 are the most commonly-used rate control agents and although they have a greater impact than  
38  
39 digoxin on heart rate during exertion, there is no evidence that this results in better exercise  
40  
41 capacity.<sup>16, 17, 44-46</sup> Beta-blockers did not improve arrhythmia-related symptoms in an RCT of  
42  
43 60 low-risk patients with permanent AF, compared to diltiazem and verapamil which reduced  
44  
45 the frequency of symptoms.<sup>47</sup> Those in the beta-blocker group had a reduction in exercise  
46  
47 capacity on cardio-pulmonary testing and a significant increase in B-type natriuretic peptide  
48  
49 (BNP) compared to those treated with CCB.<sup>48</sup> Analysis of smaller trials comparing beta-  
50  
51 blockers with CCB are inconsistent.<sup>16</sup> Similarly, compared to verapamil or diltiazem, digoxin  
52  
53 has less effect on heart rate but there is no consistent evidence for any difference in functional  
54  
55 outcomes.<sup>16, 17, 44, 46, 49</sup> Importantly, diltiazem and verapamil are usually avoided in patients  
56  
57  
58  
59  
60



1 with reduced ejection fraction due to the risk of adverse outcomes,<sup>50-54</sup> leaving only beta-  
2 blockers or digoxin as suitable therapy. Only a single RCT has been published comparing  
3 beta-blockers with digoxin in patients with AF and heart failure (mean LVEF 24%, n=47).<sup>55</sup>  
4 Although there was a marginally-significant improvement in LVEF with combined  
5 carvedilol/digoxin versus placebo/digoxin, blinded withdrawal of digoxin then led to a  
6 deterioration in LVEF, accompanied by an increase in BNP. The direct effects of digoxin on  
7 LVEF and diastolic function have only been studied in patients with sinus rhythm; in these  
8 patients digoxin increased LVEF by 3-11% and improved E/A ratio and mitral deceleration  
9 time.<sup>56-58</sup> Magnesium has been shown to successfully complement digoxin therapy to achieve  
10 lower ventricular rates in AF patients<sup>59</sup>, but is not in common use due to the availability of  
11 beta-blockers and CCB which are more potent agents for acute heart rate control.<sup>1</sup> Although  
12 data on patient-reported quality of life is limited,<sup>60, 61</sup> rate control has been associated with  
13 improved quality of life in trials assessing rate versus rhythm control.<sup>62-64</sup> The mechanism by  
14 which rate control therapy mediates an increase in physical functioning and quality of life is  
15 unknown but conceivably due to improvements in LVEF and/or diastolic function.  
16  
17  
18  
19  
20  
21  
22  
23  
24  
25  
26  
27  
28  
29  
30  
31  
32  
33  
34  
35  
36

37 In summary, rate control is an important part of treatment in all AF patients but the evidence-  
38 base is poor, particularly in those with permanent AF who form the majority of patients in  
39 clinical practice. Rate control in AF is also subject to considerable, and poorly characterised  
40 individual variability in response, with limited information about the effects of therapy on  
41 cardiac function, quality of life and functional capacity.  
42  
43  
44  
45  
46  
47  
48  
49  
50  
51  
52  
53  
54  
55  
56  
57  
58  
59  
60

## The RATE-AF trial

The RATE-AF trial is the first head-to-head randomised assessment of beta-blockers versus digoxin as the initial rate control agent in patients with AF. The trial has a prospective, randomised, open-label, investigator-blinded endpoint (PROBE) design, and is planned as an inclusive study that reflects and will have an important impact on clinical practice (see Information for Patients in **Table 1**). The primary outcome is patient-reported quality of life using the SF-36 physical component summary score at 6 months' post-randomisation. The major secondary outcomes are change in LVEF and diastolic function on echocardiography, functional capacity, global and AF-specific quality of life, and cardiovascular biomarkers (see **Table 2**). A key objective of the trial is to improve the methods used for measuring quality of life in AF patients, as well as optimising the validity, reproducibility and acquisition of echocardiographic left-ventricular function. The RATE-AF trial will also act as a feasibility study to plan a future, event-driven clinical trial exploring the impact of different rate control strategies on cardiovascular events and unplanned hospital admissions. The study is sponsored by the University of Birmingham and funded by the National Institute for Health Research (NIHR), as part of a Career Development Fellowship awarded to the Chief Investigator (DK).

### Patients

Inclusion criteria are patients aged 60 years or older with breathlessness (New York Heart Association Class II or more) and permanent AF, characterised as a physician decision for rate control with no plans for cardioversion, AAD or ablation therapy. Only limited exclusion criteria apply (**Figure 3**), reflecting clear requirements or contraindications for either beta-blockers or digoxin. As neither agent impacts on mortality in patients with heart failure<sup>19, 20</sup>, reduced LVEF is not an exclusion criterion. All patients are expected to be anticoagulated if appropriate, according to their clinical risk of stroke and thromboembolism.

### **Study procedures and outcomes**

One hundred and sixty eligible patients newly in need of rate control will be invited to participate in the study from primary and secondary care across two major NHS Trusts in Birmingham, UK. The RATE-AF trial is managed by the Birmingham Clinical Trials Unit (BCTU; University of Birmingham) and situated within the Birmingham NIHR/Wellcome Trust Clinical Research Facility.

Following written informed consent, participants will be randomised in a 1:1 ratio to either bisoprolol or digoxin therapy. Stratified randomisation will be provided by a computer-generated minimisation algorithm to ensure balance between the treatment arms for baseline European Heart Rhythm Association (EHRA) class and gender. Allocation will be concealed until the patient has been recruited and consented, thereafter the trial will be open-label.

Baseline assessment procedures will include patient-reported quality of life questionnaires (**Table 3**), 6-minute walk distance, echocardiography and biomarker assessment. Participants will then receive study medication (bisoprolol 1.25-15 mg or digoxin 62.5-250 µg once daily), with scheduled uptitration visits to attain a heart rate at rest of  $\leq 100$  bpm. Ambulatory 24-hour ECG monitoring will be performed at the end of uptitration (unblinded). Investigator-blinded endpoints will be assessed at the interim (6 month) and final (12 month) visit, which include patient-reported quality of life, echocardiographic parameters of systolic and diastolic left-ventricular function and biomarker assessment (**see Figure 3**).

### **Exploratory work and clinical practice improvement**

During the trial, qualitative research using focus groups and structured interviews will assess whether the quality of life questionnaires adequately and acceptably assess changes in symptom burden in a sample of patients from each treatment arm. The aim of this work is to identify the best processes for measuring patient-reported outcomes in AF, following on from a

1 systematic review of measurement properties that identified key evidence-gaps.<sup>65</sup>  
2  
3  
4 Optimal acquisition of echocardiography in patients with AF will be determined by  
5  
6 reproducibility studies, comparing repeated measures of systolic/diastolic function according to  
7  
8 cardiac cycle length. The aim of this work is to produce a standardised protocol of  
9  
10 echocardiography in patients with AF.  
11  
12 Blood samples from participants will analysed for the cellular effects of rate control  
13  
14 (intracellular sodium, calcium and cardiotonic steroids) using integrated  
15  
16 fluorescence/contractility photometry in human cardiomyocytes. This work will give  
17  
18 mechanistic insight into the cellular response to beta-blockers and digoxin, and identify novel  
19  
20 markers of treatment effect. Serum will also be stored for the development of new blood-based  
21  
22 and genetic biomarkers that aid in personalisation of rate control therapy.  
23  
24  
25  
26  
27

### 28 **Statistical considerations**

30  
31 The null hypothesis is of no difference in the physical functioning domain of the SF-36 quality  
32  
33 of life questionnaire when comparing a strategy of digoxin versus beta-blocker therapy for  
34  
35 initial rate control in older patients with permanent AF. The alternative hypothesis is  
36  
37 superiority of one over the other therapy as an initial strategy of care. Randomising 144  
38  
39 patients we can assume an 85% power to detect an effect size of half a standard deviation in a  
40  
41 continuous outcome measure of quality of life (two-sided alpha of 0.05). Assuming that 10%  
42  
43 of patients will be lost to follow-up, 160 patients are needed. There is some evidence from  
44  
45 existing research to support the notion that the treatment effect could be this large. This  
46  
47 includes a 17% improvement in SF-36 role-physical score in the rate control arm of the RACE  
48  
49 study,<sup>63</sup> a 22% improvement in a proprietary symptom-checklist with CCB (compared to 8%  
50  
51 change in those assigned beta-blockers),<sup>18</sup> and 17% improvement with rate control using SF-36  
52  
53 in the PIAF trial.<sup>64</sup> The RATE-AF trial will also us to explore surrogates for clinical outcomes,  
54  
55 such as LVEF using echocardiography and B-type natriuretic peptide, and provide estimates  
56  
57  
58  
59  
60

1  
2 for a future definitive trial of rate control in AF, including reliable information on recruitment  
3 rates, study drug titration, cross-over, retention and healthcare costs.  
4  
5  
6  
7

### 8 **Trial oversight, management and registration**

9  
10 The trial has ethical approval from the East Midlands - Derby Research Ethics Committee  
11 (16/EM/0178), and regulatory approval from the Medicines and Healthcare products  
12 Regulatory Agency (MHRA). RATE-AF will be conducted in accordance with guidelines for  
13 Good Clinical Practice (GCP) and the Declaration of Helsinki.  
14  
15  
16  
17  
18

19 Oversight will be provided by a Trial Steering Committee, comprising an independent Data  
20 Monitoring Committee and members of the RATE-AF Trial Management Group. This  
21 includes representatives of the patient and public involvement panel, involved in both the  
22 design and management of the trial. A Clinical Events Committee will be formed to adjudicate  
23 on adverse events.  
24  
25  
26  
27  
28  
29

30 The RATE-AF trial is registered at [clinicaltrials.gov](http://clinicaltrials.gov) (NCT02391337) and EudraCT (2015-  
31 005043-13). Further information can be obtained from the trial website,  
32 <http://www.birmingham.ac.uk/rate-af>, and the trial protocol (see **Appendix**). The protocol was  
33 developed in accordance with the Standard Protocol Items for Randomized Trials [SPIRIT]  
34 statement<sup>66</sup>, and the latest guidance from the International Society for Quality of Life Research  
35 (ISOQOL) Best Practice taskforce.<sup>67-69</sup>  
36  
37  
38  
39  
40  
41  
42  
43  
44  
45  
46  
47  
48  
49  
50  
51  
52  
53  
54  
55  
56  
57  
58  
59  
60

## Conclusion

Defining appropriate rate control therapy is vital, particularly in the rapidly growing number of older patients with permanent AF where current evidence is extremely limited. Rate control is an integral part of management in almost all AF patients but hardly any controlled trial evidence exists to guide the choice of agents. This is unacceptable in light of the potential benefits and possible adverse effects of treatment. In addition, the complete lack of data on the impact of medical therapy on symptom burden and heart function necessitate a programme of reproducibility and validity of both patient-reported quality of life and cardiac imaging in AF. The RATE-AF trial will answer key clinical questions about how to initiate therapy in order to improve patient well-being, stratified by relevant patient characteristics such as baseline symptoms, systolic and diastolic cardiac function, and biomarkers of treatment effect.

## Acknowledgements

We would like to acknowledge other members of the wider RATE-AF team, including Karina Bunting, Margaret Grant, Hannah Lack, Susan Jowett, Jonathan Mathers, and Davor Pavlovic (University of Birmingham). We are indebted to the independent members of the trial oversight committees, as well as the Patient and Public Involvement (PPI) Team.

### Competing interests

None of the authors report a conflict of interest. All authors have completed the ICMJE uniform disclosure form ([www.icmje.org/coi\\_disclosure.pdf](http://www.icmje.org/coi_disclosure.pdf)) and declare:

DK reports grants from Menarini, during the conduct of the study; non-financial support from Daiichi Sankyo and personal fees from AtriCure, outside the submitted work. MC reports grants from the National Institute of Health Research, during the conduct of the study; and personal fees from Astella Pharma and Ferring Pharma, outside the submitted work. PK reports consulting fees and honoraria from Bayer Healthcare, Boehringer Ingelheim, Bristol-Myers Squibb, Daiichi-Sankyo, Medtronic, Pfizer and Servier, all outside the submitted work; research grants from Bristol-Myers Squibb, Pfizer, Cardiovascular Therapeutics, Daiichi Sankyo, Sanofi, St. Jude Medical, German Federal Ministry for Education and Research (BMBF), Fondation Leducq, German Research Foundation (DFG), European Union, British Heart Foundation and Medical Research Council UK, all outside the submitted work; and is listed on two patent applications on AF therapy and markers for AF, both outside the submitted work. GYHL has served as a consultant for Bayer, Astellas, Merck, AstraZeneca, Sanofi, BMS/Pfizer, Biotronik, Portola and Boehringer Ingelheim, and has been on the speaker's bureau for Bayer, BMS/Pfizer, Boehringer Ingelheim, and Sanofi-Aventis. RPS is the President of the British Society of Echocardiography. JJD, MG, MS, JNT, SM, GS report no competing interests.

### **Authors' contributions**

The manuscript was drafted by DK who is the Chief Investigator for the RATE-AF trial. MG and GYHL are Principal Investigators. MC, PK, RPS and JNT are members of the Trial Management Group. JJD, SM and GS are representatives from the Clinical Trials Unit. MS is the Lead for the Patient Involvement Panel, and a member of the Steering Committee. All authors contributed to the writing of the RATE-AF protocol and patient information, and edited this manuscript for intellectual content.

### **Funding**

DK and the RATE-AF trial are supported by the National Institute of Health Research (NIHR) as part of a Career Development Fellowship (CDF-2015-08-074). The opinions expressed in this paper are those of the authors and do not represent the NIHR or the UK Department of Health.

### **Data Sharing Statement**

No additional data available.



## References

1. **Kirchhof P, Benussi S, Kotecha D, et al.** 2016 ESC Guidelines for the management of atrial fibrillation developed in collaboration with EACTS: The Task Force for the management of atrial fibrillation of the European Society of Cardiology (ESC). Developed with the special contribution of the European Heart Rhythm Association (EHRA) of the ESC. Endorsed by the European Stroke Organisation (ESO). *Eur Heart J.* 2016;10.1093/eurheartj/ehw210
2. **Chugh SS, Havmoeller R, Narayanan K, et al.** Worldwide epidemiology of atrial fibrillation: a Global Burden of Disease 2010 Study. *Circulation.* 2014;**129**:837-847
3. **Krijthe BP, Kunst A, Benjamin EJ, et al.** Projections on the number of individuals with atrial fibrillation in the European Union, from 2000 to 2060. *Eur Heart J.* 2013;**34**:2746-2751
4. **Chiang CE, Naditch-Brule L, Murin J, et al.** Distribution and risk profile of paroxysmal, persistent, and permanent atrial fibrillation in routine clinical practice: insight from the real-life global survey evaluating patients with atrial fibrillation international registry. *Circ Arrhythm Electrophysiol.* 2012;**5**:632-639
5. **Kotecha D, Piccini JP.** Atrial fibrillation in heart failure: what should we do? *Eur Heart J.* 2015;**36**:3250-3257
6. **Kotecha D, Lam CS, Van Veldhuisen DJ, et al.** Heart failure with preserved ejection fraction and atrial fibrillation - Vicious twins. *J Am Coll Cardiol.* 2016;**68**:2217-2228
7. **Kotecha D, Banerjee A, Lip GY.** Increased stroke risk in atrial fibrillation patients with heart failure: does ejection fraction matter? *Stroke.* 2015;**46**:608-609
8. **Christiansen CB, Olesen JB, Gislason G, et al.** Cardiovascular and non-cardiovascular hospital admissions associated with atrial fibrillation: a Danish nationwide, retrospective cohort study. *BMJ Open.* 2013;**3**
9. **Ambrosy AP, Fonarow GC, Butler J, et al.** The global health and economic burden of hospitalizations for heart failure: lessons learned from hospitalized heart failure registries. *J Am Coll Cardiol.* 2014;**63**:1123-1133

- 1  
2  
3  
4  
5  
6  
7  
8  
9  
10  
11  
12  
13  
14  
15  
16  
17  
18  
19  
20  
21  
22  
23  
24  
25  
26  
27  
28  
29  
30  
31  
32  
33  
34  
35  
36  
37  
38  
39  
40  
41  
42  
43  
44  
45  
46  
47  
48  
49  
50  
51  
52  
53  
54  
55  
56  
57  
58  
59  
60
10. **Kotecha D, Chudasama R, Lane DA, et al.** Atrial fibrillation and heart failure due to reduced versus preserved ejection fraction: A systematic review and meta-analysis of death and adverse outcomes. *Int J Cardiol.* 2016;**203**:660-666
11. **Kirchhof P, Breithardt G, Bax J, et al.** A roadmap to improve the quality of atrial fibrillation management: proceedings from the fifth Atrial Fibrillation Network/European Heart Rhythm Association consensus conference. *Europace.* 2016;**18**:37-50
12. **National Institute for Health and Care Excellence.** Atrial fibrillation: the management of atrial fibrillation. *NICE clinical guideline 180.* 2014; **Accessed 15/09/2014**; <http://www.nice.org.uk/guidance/cg180/>
13. **January CT, Wann LS, Alpert JS, et al.** 2014 AHA/ACC/HRS guideline for the management of patients with atrial fibrillation: executive summary: a report of the American College of Cardiology/American Heart Association Task Force on practice guidelines and the Heart Rhythm Society. *Circulation.* 2014;**130**:2071-2104
14. **Kotecha D, Kirchhof P.** Rate and rhythm control have comparable effects on mortality and stroke in atrial fibrillation but better data are needed. *Evid Based Med.* 2014;**19**:222-223
15. Segal JB, McNamara RL, Miller MR, et al. The evidence regarding the drugs used for ventricular rate control. *J Fam Practice.* 2000;**49**:47-59
16. **Nikolaidou T, Channer KS.** Chronic atrial fibrillation: a systematic review of medical heart rate control management. *Postgrad Med J.* 2009;**85**:303-312
17. **Farshi R, Kistner D, Sarma JSM, et al.** Ventricular rate control in chronic atrial fibrillation during daily activity and programmed exercise: a crossover open-label study of five drug regimens. *J Am Coll Cardiol.* 1999;**33**:304-310
18. **Ulimoen SR, Enger S, Carlson J, et al.** Comparison of four single-drug regimens on ventricular rate and arrhythmia-related symptoms in patients with permanent atrial fibrillation. *Am J Cardiol.* 2013;**111**:225-230
19. **Kotecha D, Holmes J, Krum H, et al.** Efficacy of beta blockers in patients with heart failure plus atrial fibrillation: an individual-patient data meta-analysis. *Lancet.* 2014;**384**:2235-2243

- 1  
2  
3  
4  
5  
6  
7  
8  
9  
10  
11  
12  
13  
14  
15  
16  
17  
18  
19  
20  
21  
22  
23  
24  
25  
26  
27  
28  
29  
30  
31  
32  
33  
34  
35  
36  
37  
38  
39  
40  
41  
42  
43  
44  
45  
46  
47  
48  
49  
50  
51  
52  
53  
54  
55  
56  
57  
58  
59  
60
20. **Ziff OJ, Lane DA, Samra M, et al.** Safety and efficacy of digoxin: systematic review and meta-analysis of observational and controlled trial data. *BMJ*. 2015;**351**:h4451
21. **Wyse DG, Waldo AL, DiMarco JP, et al.** A comparison of rate control and rhythm control in patients with atrial fibrillation. *N Engl J Med*. 2002;**347**:1825-1833
22. **Van Gelder IC, Hagens VE, Bosker HA, et al.** A Comparison of Rate Control and Rhythm Control in Patients with Recurrent Persistent Atrial Fibrillation. *N Engl J Med*. 2002;**347**:1834-1840
23. **de Denus S, Sanoski CA, Carlsson J, et al.** Rate vs rhythm control in patients with atrial fibrillation: a meta-analysis. *Arch Intern Med*. 2005;**165**:258-262
24. **Chatterjee S, Sardar P, Lichstein E, et al.** Pharmacologic rate versus rhythm-control strategies in atrial fibrillation: an updated comprehensive review and meta-analysis. *PACE*. 2013;**36**:122-133
25. **Al-Khatib SM, Allen LaPointe NM, Chatterjee R, et al.** Rate- and rhythm-control therapies in patients with atrial fibrillation: a systematic review. *Ann Intern Med*. 2014;**160**:760-773
26. **Roy D, Talajic M, Nattel S, et al.** Rhythm Control versus Rate Control for Atrial Fibrillation and Heart Failure. *N Engl J Med*. 2008;**358**:2667-2677
27. **Kong MH, Shaw LK, O'Connor C, et al.** Is rhythm-control superior to rate-control in patients with atrial fibrillation and diastolic heart failure? *Ann Noninvasive Electrocardiol*. 2010;**15**:209-217
28. **Corley SD, Epstein AE, DiMarco JP, et al.** Relationships between sinus rhythm, treatment, and survival in the Atrial Fibrillation Follow-Up Investigation of Rhythm Management (AFFIRM) Study. *Circulation*. 2004;**109**:1509-1513
29. **Wazni O, Wilkoff B, Saliba W.** Catheter Ablation for Atrial Fibrillation. *N Engl J Med*. 2011;**365**:2296-2304
30. **Jones DG, Haldar SK, Hussain W, et al.** A randomized trial to assess catheter ablation versus rate control in the management of persistent atrial fibrillation in heart failure. *J Am Coll Cardiol*. 2013;**61**:1894-1903
31. **Kirchhof P, Ammentorp B, Darius H, et al.** Management of atrial fibrillation in seven

- 1 European countries after the publication of the 2010 ESC Guidelines on atrial  
2 fibrillation: primary results of the PREvention of thromboemolic events--European  
3 Registry in Atrial Fibrillation (PREFER in AF). *Europace*. 2014;**16**:6-14  
4  
5  
6  
7  
8 32. **Senoo K, Lip GY, Lane DA, et al.** Residual risk of stroke and death in anticoagulated  
9 patients according to the type of atrial fibrillation: AMADEUS Trial. *Stroke*.  
10 2015;**46**:2523-2528  
11  
12  
13  
14 33. **Van Gelder IC, Groenveld HF, Crijns HJGM, et al.** Lenient versus Strict Rate  
15 Control in Patients with Atrial Fibrillation. *N Engl J Med*. 2010;**362**:1363-1373  
16  
17  
18 34. **Groenveld HF, Crijns HJGM, Van den Berg MP, et al.** The Effect of Rate Control  
19 on Quality of Life in Patients With Permanent Atrial Fibrillation: Data From the RACE  
20 II (Rate Control Efficacy in Permanent Atrial Fibrillation II) Study. *J Am Coll Cardiol*.  
21 2011;**58**:1795-1803  
22  
23  
24  
25 35. **Groenveld HF, Tijssen JG, Crijns HJ, et al.** Rate control efficacy in permanent atrial  
26 fibrillation: successful and failed strict rate control against a background of lenient rate  
27 control: data from RACE II (Rate Control Efficacy in Permanent Atrial Fibrillation). *J*  
28 *Am Coll Cardiol*. 2013;**61**:741-748  
29  
30  
31  
32  
33 36. **Van Gelder IC, Wyse DG, Chandler ML, et al.** Does intensity of rate-control  
34 influence outcome in atrial fibrillation? An analysis of pooled data from the RACE and  
35 AFFIRM studies. *Europace*. 2006;**8**:935-942  
36  
37  
38  
39 37. **Cooper HA, Bloomfield DA, Bush DE, et al.** Relation between achieved heart rate  
40 and outcomes in patients with atrial fibrillation (from the Atrial Fibrillation Follow-up  
41 Investigation of Rhythm Management [AFFIRM] Study). *Am J Cardiol*. 2004;**93**:1247-  
42 1253  
43  
44  
45  
46 38. **Groenveld HF, Crijns HJ, Rienstra M, et al.** Does intensity of rate control influence  
47 outcome in persistent atrial fibrillation? Data of the RACE study. *Am Heart J*.  
48 2009;**158**:785-791  
49  
50  
51  
52  
53 39. **Cullington D, Goode KM, Zhang J, et al.** Is heart rate important for patients with  
54 heart failure in atrial fibrillation? *JACC Heart Fail*. 2014;**2**:213-220  
55  
56  
57  
58 40. **Steg PG, Alam S, Chiang C-E, et al.** Symptoms, functional status and quality of life in  
59 patients with controlled and uncontrolled atrial fibrillation: data from the RealiseAF  
60

- 1 cross-sectional international registry. *Heart*. 2012;**98**:195-201
- 2
- 3
- 4 41. **Nabauer M, Gerth A, Limbourg T, et al.** The Registry of the German Competence
- 5 NETwork on Atrial Fibrillation: patient characteristics and initial management.
- 6 *Europace*. 2009;**11**:423-434
- 7
- 8
- 9
- 10 42. **Lip GY, Laroche C, Dan GA, et al.** A prospective survey in European Society of
- 11 Cardiology member countries of atrial fibrillation management: baseline results of
- 12 EURObservational Research Programme Atrial Fibrillation (EORP-AF) Pilot General
- 13 Registry. *Europace*. 2014;**16**:308-319
- 14
- 15
- 16
- 17
- 18 43. **The Digitalis Investigation Group.** The effect of digoxin on mortality and morbidity
- 19 in patients with heart failure. *N Engl J Med*. 1997;**336**:525-533
- 20
- 21
- 22 44. **Koh KK, Kwon KS, Park HB, et al.** Efficacy and safety of digoxin alone and in
- 23 combination with low-dose diltiazem or betaxolol to control ventricular rate in chronic
- 24 atrial fibrillation. *Am J Cardiol*. 1995;**75**:88-90
- 25
- 26
- 27
- 28 45. **Lewis RV, McMurray J, McDevitt DG.** Effects of atenolol, verapamil, and xamoterol
- 29 on heart rate and exercise tolerance in digitalised patients with chronic atrial
- 30 fibrillation. *J Cardiovasc Pharmacol*. 1989;**13**:1-6
- 31
- 32
- 33
- 34 46. **Tsuneda T, Yamashita T, Fukunami M, et al.** Rate control and quality of life in
- 35 patients with permanent atrial fibrillation: the Quality of Life and Atrial Fibrillation
- 36 (QOLAF) Study. *Circ J*. 2006;**70**:965-970
- 37
- 38
- 39
- 40 47. **Ulimoen SR, Enger S, Carlson J, et al.** Comparison of four single-drug regimens on
- 41 ventricular rate and arrhythmia-related symptoms in patients with permanent atrial
- 42 fibrillation. *Am J Cardiol*. 2013;**111**:225-230
- 43
- 44
- 45
- 46 48. **Ulimoen SR, Enger S, Pripp AH, et al.** Calcium channel blockers improve exercise
- 47 capacity and reduce N-terminal Pro-B-type natriuretic peptide levels compared with
- 48 beta-blockers in patients with permanent atrial fibrillation. *Eur Heart J*. 2014;**35**:517-
- 49 524
- 50
- 51
- 52
- 53
- 54 49. **Lewis RV, Irvine N, McDevitt DG.** Relationships between heart rate, exercise
- 55 tolerance and cardiac output in atrial fibrillation: the effects of treatment with digoxin,
- 56 verapamil and diltiazem. *Eur Heart J*. 1988;**9**:777-781
- 57
- 58
- 59
- 60

- 1  
2  
3  
4  
5  
6  
7  
8  
9  
10  
11  
12  
13  
14  
15  
16  
17  
18  
19  
20  
21  
22  
23  
24  
25  
26  
27  
28  
29  
30  
31  
32  
33  
34  
35  
36  
37  
38  
39  
40  
41  
42  
43  
44  
45  
46  
47  
48  
49  
50  
51  
52  
53  
54  
55  
56  
57  
58  
59  
60
50. **McMurray JJ, Adamopoulos S, Anker SD, et al.** ESC Guidelines for the diagnosis and treatment of acute and chronic heart failure 2012: The Task Force for the Diagnosis and Treatment of Acute and Chronic Heart Failure 2012 of the European Society of Cardiology. Developed in collaboration with the Heart Failure Association (HFA) of the ESC. *Eur Heart J.* 2012;**33**:1787-1847
51. **Elkayam U.** Calcium channel blockers in heart failure. *Cardiology.* 1998;**89 Suppl 1**:38-46
52. The effect of diltiazem on mortality and reinfarction after myocardial infarction. The Multicenter Diltiazem Postinfarction Trial Research Group. *N Engl J Med.* 1988;**319**:385-392
53. **Goldstein RE, Boccuzzi SJ, Cruess D, et al.** Diltiazem increases late-onset congestive heart failure in postinfarction patients with early reduction in ejection fraction. *Circulation.* 1991;**83**:52-60
54. **The Danish Study Group on Verapamil in Myocardial Infarction.** Secondary prevention with verapamil after myocardial infarction. *Am J Cardiol.* 1990;**66**:33-40
55. **Khand AU, Rankin AC, Martin W, et al.** Carvedilol alone or in combination with digoxin for the management of atrial fibrillation in patients with heart failure? *J Am Coll Cardiol.* 2003;**42**:1944-1951
56. **Partanen J, Heikkila J, Pellinen T, et al.** Effect of digoxin on the heart in normal subjects: influence of isometric exercise and autonomic blockade: a noninvasive study. *Br J Clin Pharmacol.* 1988;**25**:331-340
57. **Dernellis JM, Panaretou MP.** Effects of digoxin on left atrial function in heart failure. *Heart.* 2003;**89**:1308-1315
58. **Giunta A, Maione S, Arnese MR, et al.** Effects of intravenous digoxin on pulmonary venous and transmitral flows in patients with chronic heart failure of different degrees. *Clin Cardiol.* 1995;**18**:27-33
59. **Kotecha D.** Magnesium for Atrial Fibrillation, Myth or Magic? *Circ Arrhythm Electrophysiol.* 2016;10.1161/circep.116.004521
60. **Thrall G, Lane D, Carroll D, et al.** Quality of Life in Patients with Atrial Fibrillation:

- 1  
2  
3  
4  
5  
6  
7  
8  
9  
10  
11  
12  
13  
14  
15  
16  
17  
18  
19  
20  
21  
22  
23  
24  
25  
26  
27  
28  
29  
30  
31  
32  
33  
34  
35  
36  
37  
38  
39  
40  
41  
42  
43  
44  
45  
46  
47  
48  
49  
50  
51  
52  
53  
54  
55  
56  
57  
58  
59  
60
- A Systematic Review. *Am J Med.* 2006;**119**:448.e441-419
61. **Rienstra M, Lubitz SA, Mahida S, et al.** Symptoms and Functional Status of Patients With Atrial Fibrillation: State of the Art and Future Research Opportunities. *Circulation.* 2012;**125**:2933-2943
62. **Pepine CJ.** Effects of pharmacologic therapy on health-related quality of life in elderly patients with atrial fibrillation: a systematic review of randomized and nonrandomized trials. *Clin Med Insights Cardiol.* 2013;**7**:1-20
63. **Hagens VE, Ranchor AV, Van Sonderen E, et al.** Effect of rate or rhythm control on quality of life in persistent atrial fibrillation: Results from the Rate Control Versus Electrical Cardioversion (RACE) study. *J Am Coll Cardiol.* 2004;**43**:241-247
64. **Grönefeld GC, Lilienthal J, Kuck K-H, et al.** Impact of rate versus rhythm control on quality of life in patients with persistent atrial fibrillation: Results from a prospective randomized study. *Eur Heart J.* 2003;**24**:1430-1436
65. **Kotecha D, Ahmed A, Calvert M, et al.** Patient-Reported Outcomes for Quality of Life Assessment in Atrial Fibrillation: A Systematic Review of Measurement Properties. *PLoS ONE.* 2016;**11**:e0165790
66. **Chan AW, Tetzlaff JM, Gotzsche PC, et al.** SPIRIT 2013 explanation and elaboration: guidance for protocols of clinical trials. *BMJ.* 2013;**346**:e7586
67. **Calvert M, Kyte D, von Hildebrand M, et al.** Putting patients at the heart of health-care research. *Lancet.* 2015;**385**:1073-1074
68. **Calvert M, Kyte D, Duffy H, et al.** Patient-reported outcome (PRO) assessment in clinical trials: a systematic review of guidance for trial protocol writers. *PLoS One.* 2014;**9**:e110216
69. **Kyte D, Duffy H, Fletcher B, et al.** Systematic evaluation of the patient-reported outcome (PRO) content of clinical trial protocols. *PLoS One.* 2014;**9**:e110229
70. **Ware JE, Gandek B.** Overview of the SF-36 Health Survey and the International Quality of Life Assessment (IQOLA) Project. *J Clin Epidemiol.* 1998;**51**:903-912
71. **Gandek B, Sinclair SJ, Kosinski M, et al.** Psychometric evaluation of the SF-36 health survey in Medicare managed care. *Health Care Financ Rev.* 2004;**25**:5-25

- 1  
2  
3  
4  
5  
6  
7  
8  
9  
10  
11  
12  
13  
14  
15  
16  
17  
18  
19  
20  
21  
22  
23  
24  
25  
26  
27  
28  
29  
30  
31  
32  
33  
34  
35  
36  
37  
38  
39  
40  
41  
42  
43  
44  
45  
46  
47  
48  
49  
50  
51  
52  
53  
54  
55  
56  
57  
58  
59  
60
72. **Herdman M, Gudex C, Lloyd A, et al.** Development and preliminary testing of the new five-level version of EQ-5D (EQ-5D-5L). *Qual Life Res.* 2011;**20**:1727-1736
73. **Devlin NJ, Krabbe PF.** The development of new research methods for the valuation of EQ-5D-5L. *Eur J Health Econ.* 2013;**14 Suppl 1**:S1-3
74. **Janssen MF, Pickard AS, Golicki D, et al.** Measurement properties of the EQ-5D-5L compared to the EQ-5D-3L across eight patient groups: a multi-country study. *Qual Life Res.* 2013;**22**:1717-1727
75. **Spertus J, Dorian P, Bubien R, et al.** Development and validation of the Atrial Fibrillation Effect on Quality-of-Life (AFEQT) Questionnaire in patients with atrial fibrillation. *Circ Arrhythm Electrophysiol.* 2011;**4**:15-25
76. **Dorian P, Burk C, Mullin CM, et al.** Interpreting changes in quality of life in atrial fibrillation: How much change is meaningful? *Am Heart J.* 2013;**166**:381-387.e388
77. **Wynn GJ, Todd DM, Webber M, et al.** The European Heart Rhythm Association symptom classification for atrial fibrillation: validation and improvement through a simple modification. *Europace.* 2014;**16**:965-972
78. **Carlsson J, Miketic S, Windeler J, et al.** Randomized trial of rate-control versus rhythm-control in persistent atrial fibrillation: the Strategies of Treatment of Atrial Fibrillation (STAF) study. *J Am Coll Cardiol.* 2003;**41**:1690-1696
79. **Hohnloser SH, Kuck KH, Lilienthal J.** Rhythm or rate control in atrial fibrillation--Pharmacological Intervention in Atrial Fibrillation (PIAF): a randomised trial. *Lancet.* 2000;**356**:1789-1794
80. **Opolski G, Torbicki A, Kosior DA, et al.** Rate control vs rhythm control in patients with nonvalvular persistent atrial fibrillation: the results of the Polish How to Treat Chronic Atrial Fibrillation (HOT CAFE) Study. *Chest.* 2004;**126**:476-486
81. **Vora A, Karnad D, Goyal V, et al.** Control of heart rate versus rhythm in rheumatic atrial fibrillation: a randomized study. *J Cardiovasc Pharmacol Ther.* 2004;**9**:65-73



Table 1: The RATE-AF trial – Information for Patients

|                                                                                                                                                                                                                                                                                                                                                                                                                                                                                                                                                                                  |
|----------------------------------------------------------------------------------------------------------------------------------------------------------------------------------------------------------------------------------------------------------------------------------------------------------------------------------------------------------------------------------------------------------------------------------------------------------------------------------------------------------------------------------------------------------------------------------|
| <b>About atrial fibrillation</b>                                                                                                                                                                                                                                                                                                                                                                                                                                                                                                                                                 |
| Atrial fibrillation is a common heart condition that leads to an irregular and often rapid heart rate. Atrial fibrillation causes 1 in 4 strokes, and patients have frequent hospital admissions and a higher risk of dying. In addition, atrial fibrillation makes many patients feel unwell, with reduced quality of life.                                                                                                                                                                                                                                                     |
| <b>What is the purpose of the trial?</b>                                                                                                                                                                                                                                                                                                                                                                                                                                                                                                                                         |
| Atrial fibrillation usually requires medication to control heart rate, but we currently don't know which medication is better for patients. The aim of this study is to find out which of two treatments improves quality of life and the function of the heart, digoxin or bisoprolol (a beta-blocker).                                                                                                                                                                                                                                                                         |
| <b>What will happen in the trial?</b>                                                                                                                                                                                                                                                                                                                                                                                                                                                                                                                                            |
| The RATE-AF trial is designed to compare two approaches for control of heart rate, based on initial treatment with either digoxin or beta-blockers, medications which are commonly used by doctors. The main objective of the trial is to research the effects of treatment on quality of life in patients with atrial fibrillation. We will also test whether quality of life questionnaires respond to changes in symptoms experienced by patients, how we use ultrasound to look at the function of the heart, and develop new markers in the blood to personalise treatment. |
| <b>More information</b>                                                                                                                                                                                                                                                                                                                                                                                                                                                                                                                                                          |
| RATE-AF trial video: <a href="https://www.youtube.com/watch?v=4oxe8AcVo0E">https://www.youtube.com/watch?v=4oxe8AcVo0E</a><br>Patient information (British Heart Foundation): <a href="https://www.bhf.org.uk/heart-health/conditions/atrial-fibrillation">https://www.bhf.org.uk/heart-health/conditions/atrial-fibrillation</a>                                                                                                                                                                                                                                                |

Table 2: Outcomes and objectives of the RATE-AF trial

|                                                                                                                                                                                                                                                          |
|----------------------------------------------------------------------------------------------------------------------------------------------------------------------------------------------------------------------------------------------------------|
| <b>Primary outcome:</b>                                                                                                                                                                                                                                  |
| Comparison of two strategies for rate control on patient-reported quality of life, based on initial use of digoxin versus beta-blocker therapy, with a predefined focus on physical well-being using the SF-36 physical component summary at six months. |
| <b>Secondary outcomes:</b>                                                                                                                                                                                                                               |
| Patient-reported quality of life at six and twelve months, including SF-36 global and domain-specific scores, EQ-5D-5L summary index and visual analogue scale, and AFEQT overall score.                                                                 |
| Echocardiographic left-ventricular function at 12 months, including LVEF and diastolic function (E/e' and composite of diastolic indices).                                                                                                               |
| Functional assessment at 6 and 12 months, including six-minute walking distance and change in EHRA class.                                                                                                                                                |
| Change in BNP levels at 6 months.                                                                                                                                                                                                                        |
| Change in heart rate from baseline and group comparison using 24-hour ambulatory ECG at end of uptitration.                                                                                                                                              |
| <b>Feasibility assessment:</b>                                                                                                                                                                                                                           |
| Successful methods for recruitment across primary and secondary care.                                                                                                                                                                                    |
| Key issues that affect retention of participants, such as convenience, compliance and cross-over.                                                                                                                                                        |
| Drug discontinuation rate and adverse reactions leading to drug discontinuation.                                                                                                                                                                         |
| Therapy-induced requirement for additional treatment (e.g. pacemaker implantation).                                                                                                                                                                      |
| Population-specific standard deviations and proportions to enable sample size calculation for a future trial.                                                                                                                                            |
| Assessment of unplanned hospital admissions and cardiovascular outcomes.                                                                                                                                                                                 |
| <b>Exploratory objectives:</b>                                                                                                                                                                                                                           |
| Correlation of baseline measures, including quality of life questionnaires and unblinded baseline investigations such as quality of life, BNP, LVEF, E/e', EHRA class, intracellular biomarkers and heart rate.                                          |
| Impact of therapy on intracellular sodium and calcium concentration and cardiotonic steroid levels as biomarkers of cellular response at six and twelve months.                                                                                          |
| Impact of combination therapy on outcomes.                                                                                                                                                                                                               |
| Change in cognitive function at twelve months.                                                                                                                                                                                                           |
| Qualitative research of patient-reported quality of life using focus groups to explore patient acceptability, optimal delivery methods and responsiveness.                                                                                               |
| Assessment of the validity and reproducibility of echocardiographic measures in patients with AF.                                                                                                                                                        |
| Correlation of serum digoxin concentration with change in quality of life and intracellular methods.                                                                                                                                                     |
| Cost-consequence economic analysis from an NHS healthcare perspective.                                                                                                                                                                                   |

AF, Atrial Fibrillation; AFEQT, Atrial Fibrillation Effect on QualiTy-of-life questionnaire; BNP, B-type natriuretic peptide; ECG, electrocardiogram; EHRA, European Heart Rhythm Association functional class; EQ-5D-5L, EuroQol five dimensions five level questionnaire; LVEF, left ventricular ejection fraction; NHS, National Health Service; SF-36, Short Form (36) Health Survey.

Table 3: Patient-reported quality of life questionnaires used in RATE-AF

| Questionnaire                                                                      | Details                                                                                                                                                                                                                                                                                                     | Advantages and disadvantages                                                                                                                                                                                                                                                                                        |
|------------------------------------------------------------------------------------|-------------------------------------------------------------------------------------------------------------------------------------------------------------------------------------------------------------------------------------------------------------------------------------------------------------|---------------------------------------------------------------------------------------------------------------------------------------------------------------------------------------------------------------------------------------------------------------------------------------------------------------------|
| SF-36<br>Short Form (36)<br>Health Survey <sup>70</sup>                            | Generic instrument with 4-week recall period in eight domains (vitality, physical functioning, bodily pain, general health perceptions, physical role functioning, emotional role functioning, social role functioning and mental health).<br><br>11 subdivided questions, each scored with a Likert scale. | Extensively validated across a wide variety of conditions and the elderly. <sup>71</sup><br><br>Not specific to AF and hence other comorbidities may dominate responses.<br><br>Requires a license fee.                                                                                                             |
| EQ-5D-5L<br>EuroQol five dimensions five level questionnaire <sup>72, 73</sup>     | Generic instrument about today's health with a five-answer scale in five domains (mobility, self-care, usual activities, pain/discomfort and anxiety/depression).<br><br>Also includes a visual analogue scale denoting current health perception on a 0 to 100 scale.                                      | Simple questionnaire that is quick to complete and includes a visual scale.<br><br>Extensive utilisation, particularly for health economic assessment, with improvement discrimination over prior versions. <sup>74</sup><br><br>Not specific to AF and hence other comorbidities may dominate responses.           |
| AFEQT<br>Atrial Fibrillation Effect on Quality-of-life questionnaire <sup>75</sup> | AF-specific quality of life instrument with 4-week recall period in domains relating to symptoms, daily activities and concerns/satisfaction with current treatment.<br><br>20 questions, each scored with a 7-point Likert scale.                                                                          | Specific to the impact of AF on quality of life.<br><br>Better than other AF-specific tools using methodological/psychometric assessment. <sup>65</sup><br><br>Limited validation as yet in comparison to generic tools <sup>76, 77</sup> , particularly for clinical responsiveness.<br><br>License fee may apply. |

## Figure legends

### Figure 1: Evidenced-based summary for management of AF

Summary of evidence for main components of clinical management, highlighting paucity of robust data for key issues regarding rate control therapy. RCT, randomised controlled trial; LV, left-ventricular; NOAC, novel oral anticoagulants.

### Figure 2: Hospitalisation in rate versus rhythm control trials

Meta-analysis of hospitalisation in the six largest rate versus rhythm control trials, excluding hospital visits for cardioversion procedures, where applicable. Studies are pooled with a random-effects model. Significant heterogeneity was identified, with an  $I^2$  value of 66.8% ( $p=0.01$ ). Grey boxes represent the comparative weight of the study.

STAF, Strategies of Treatment of Atrial Fibrillation study (cardioversion/AAD versus rate control in persistent AF)<sup>78</sup>; PIAF, Pharmacological Intervention in Atrial Fibrillation trial (amiodarone/cardioversion versus diltiazem in persistent AF)<sup>79</sup>; HOT CAFE, How to Treat Chronic Atrial Fibrillation study (cardioversion/AAD versus rate control in persistent AF)<sup>80</sup>; AF-CHF, Atrial Fibrillation and Congestive Heart Failure trial (cardioversion/AAD versus rate control in paroxysmal/persistent AF with LVEF  $\leq 35\%$ )<sup>26</sup>; CRAAFT, Control of Rate versus Rhythm in rheumatic Atrial Fibrillation Trial (cardioversion/amiodarone versus diltiazem in persistent AF due to rheumatic heart disease)<sup>81</sup>; AFFIRM, Atrial Fibrillation Follow-up Investigation of Rhythm Management study (AAD/cardioversion versus rate control in paroxysmal/persistent AF).<sup>21</sup>

### Figure 3: RATE-AF trial schema

Trial flowchart, including major endpoints and inclusion/exclusion criteria.

Figure 1: Evidenced-based summary for management of atrial fibrillation

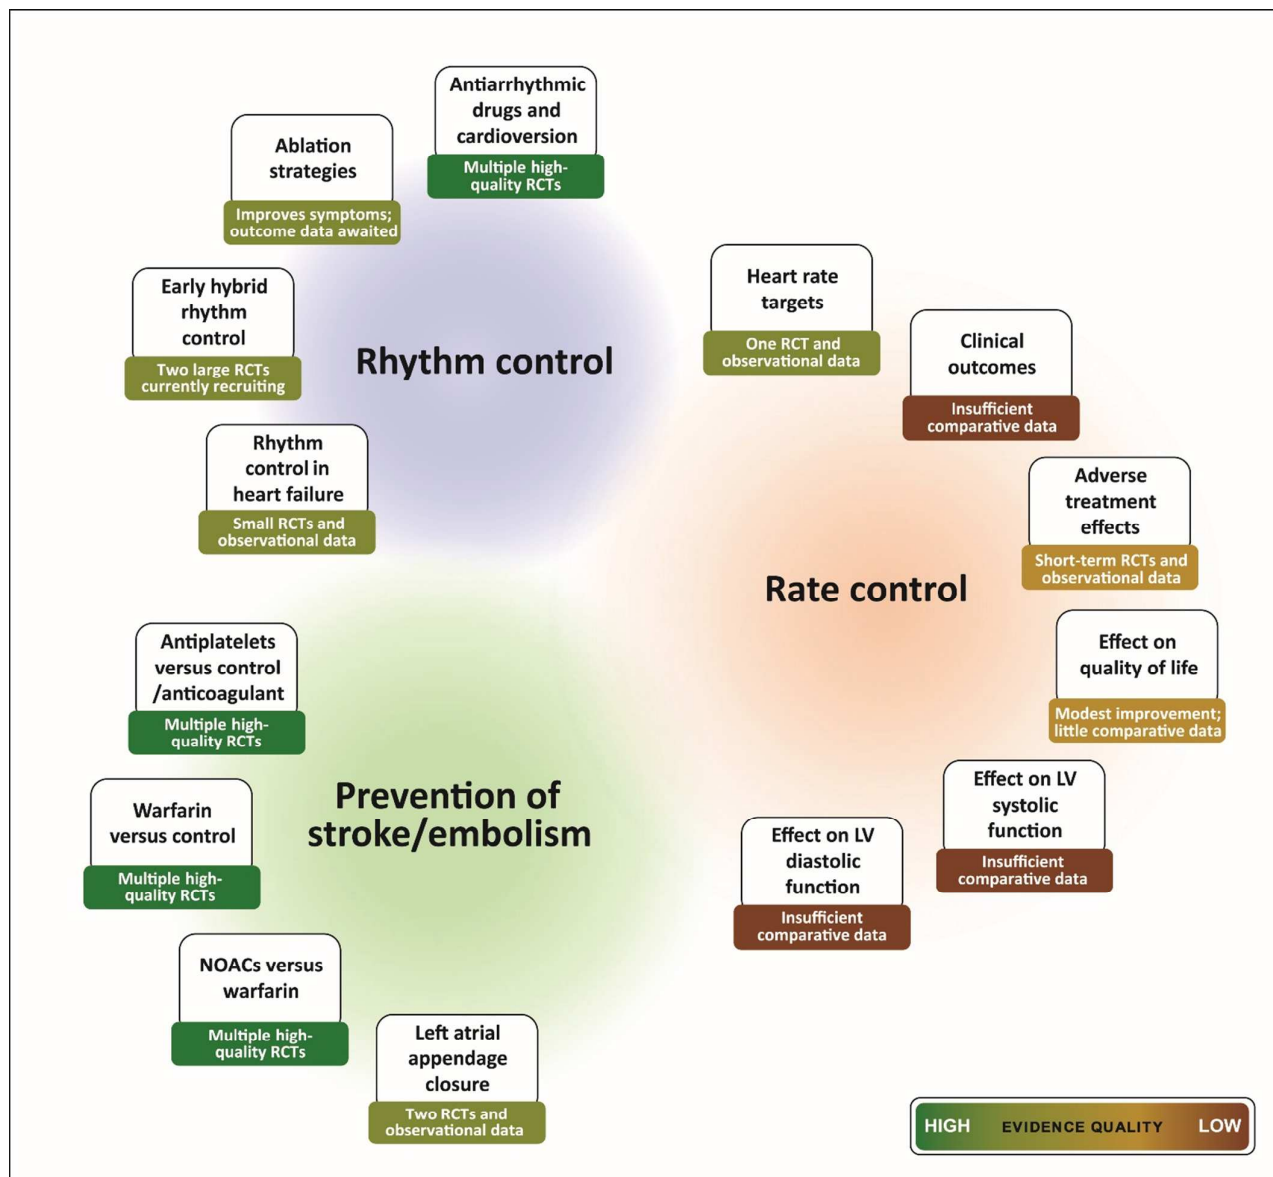

**Figure 2: Hospitalisation in major trials of rate versus rhythm control**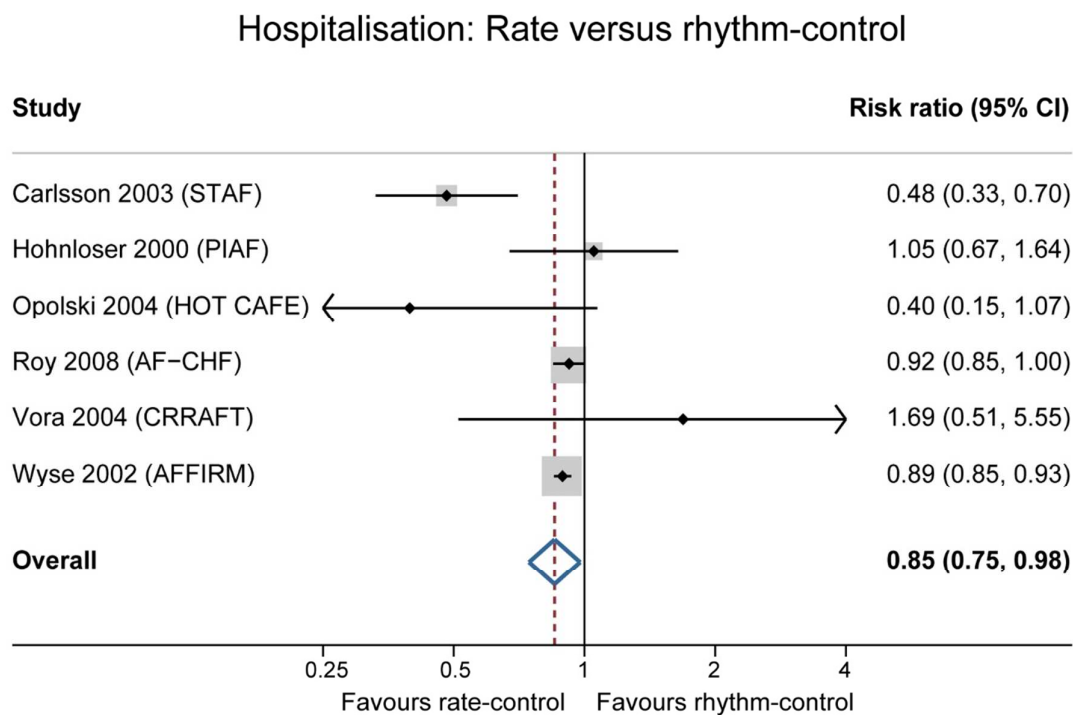

view only

Figure 3: RATE-AF trial schema

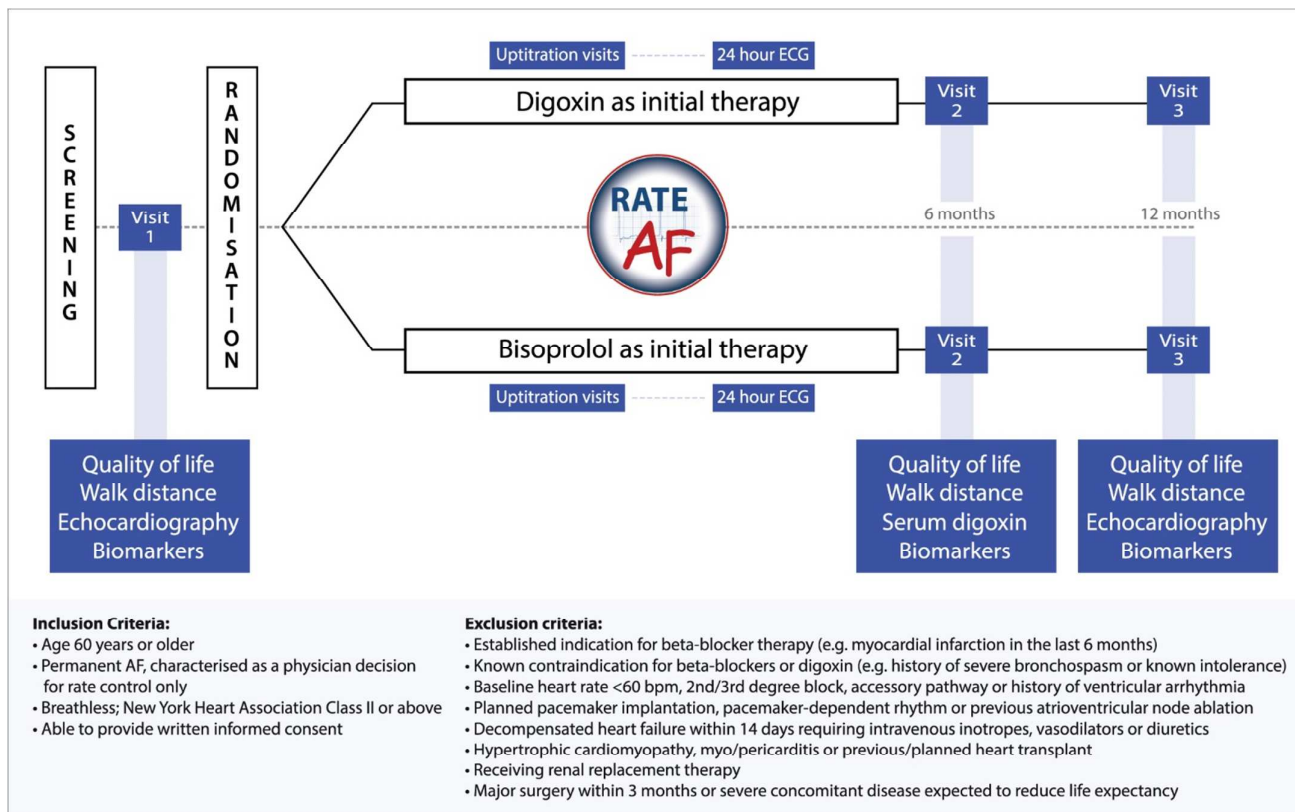

1  
2  
3  
4  
5  
6  
7  
8  
9  
10  
11  
12  
13  
14  
15  
16  
17  
18  
19  
20  
21  
22  
23  
24  
25  
26  
27  
28  
29  
30  
31  
32  
33  
34  
35  
36  
37  
38  
39  
40  
41  
42  
43  
44  
45  
46  
47  
48  
49  
50  
51  
52  
53  
54  
55  
56  
57  
58  
59  
60

**Appendix: RATE-AF trial protocol**

Please see attached file.

For peer review only



1  
2  
3  
4  
5  
6  
7  
8  
9  
10  
11  
12  
13  
14  
15  
16  
17  
18  
19  
20  
21  
22  
23  
24  
25  
26  
27  
28  
29  
30  
31  
32  
33  
34  
35  
36  
37  
38  
39  
40  
41  
42  
43  
44  
45  
46  
47  
48  
49  
50  
51  
52  
53  
54  
55  
56  
57  
58  
59  
60

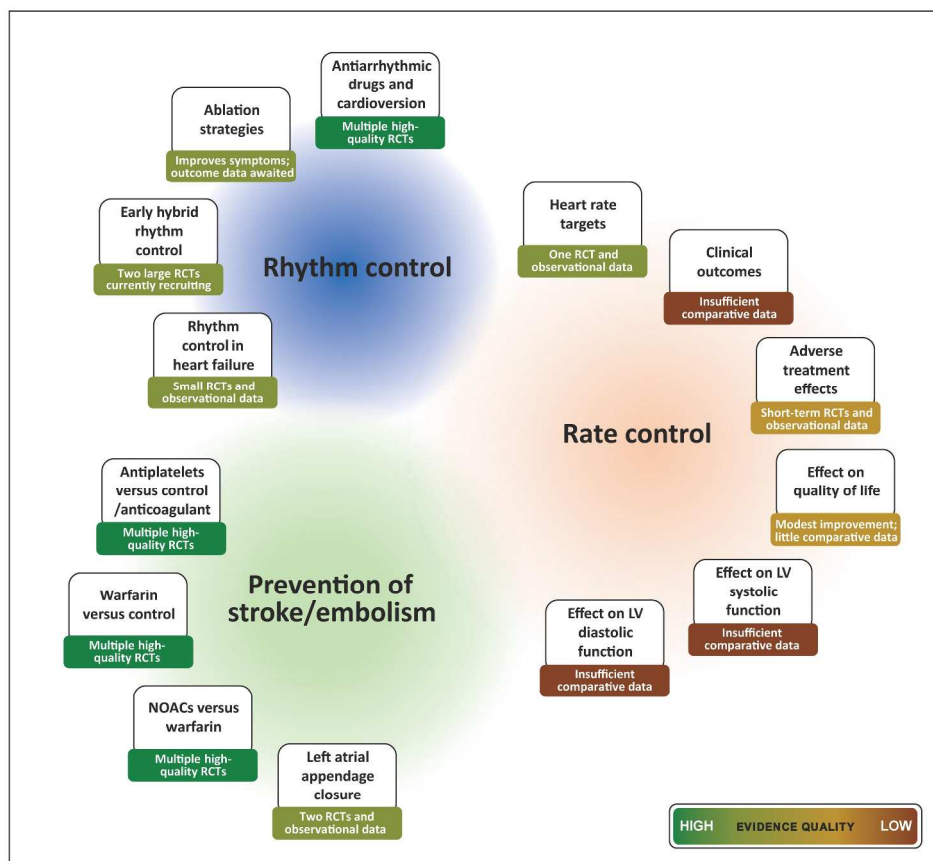

287x264mm (300 x 300 DPI)

only

1  
2  
3  
4  
5  
6  
7  
8  
9  
10  
11  
12  
13  
14  
15  
16  
17  
18  
19  
20  
21  
22  
23  
24  
25  
26  
27  
28  
29  
30  
31  
32  
33  
34  
35  
36  
37  
38  
39  
40  
41  
42  
43  
44  
45  
46  
47  
48  
49  
50  
51  
52  
53  
54  
55  
56  
57  
58  
59  
60

Hospitalisation: Rate versus rhythm-control

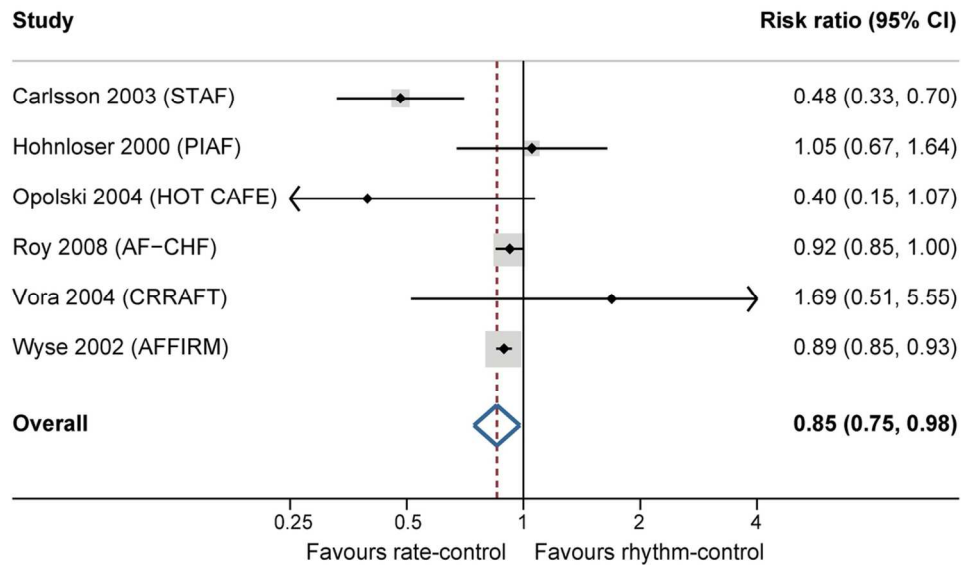

106x71mm (300 x 300 DPI)

view only

1  
2  
3  
4  
5  
6  
7  
8  
9  
10  
11  
12  
13  
14  
15  
16  
17  
18  
19  
20  
21  
22  
23  
24  
25  
26  
27  
28  
29  
30  
31  
32  
33  
34  
35  
36  
37  
38  
39  
40  
41  
42  
43  
44  
45  
46  
47  
48  
49  
50  
51  
52  
53  
54  
55  
56  
57  
58  
59  
60

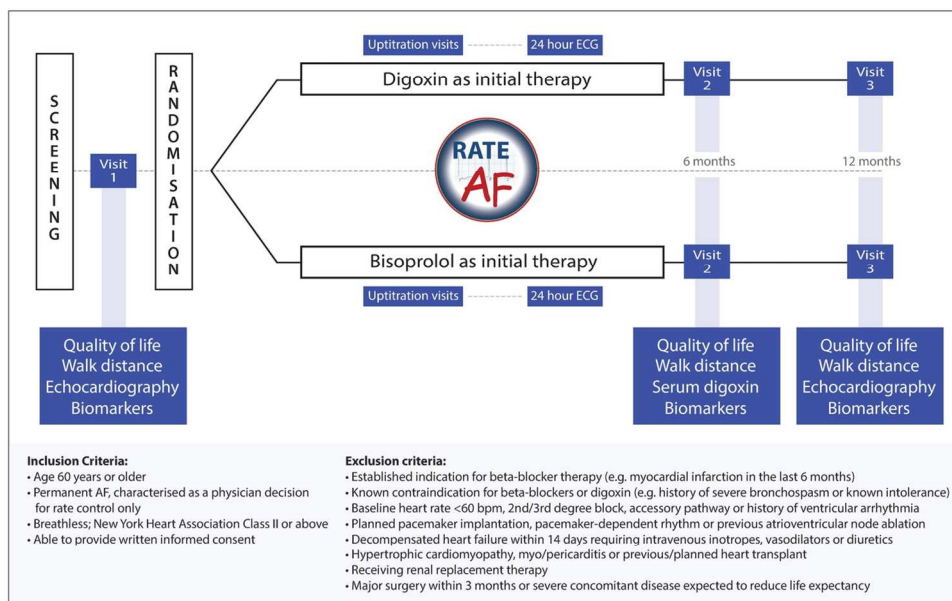

125x81mm (300 x 300 DPI)

view only

1  
2  
3  
4  
5  
6  
7  
8  
9  
10  
11  
12  
13  
14  
15  
16  
17  
18  
19  
20  
21  
22  
23  
24  
25  
26  
27  
28  
29  
30  
31  
32  
33  
34  
35  
36  
37  
38  
39  
40  
41  
42  
43  
44  
45  
46  
47  
48  
49  
50  
51  
52  
53  
54  
55  
56  
57  
58  
59  
60

# Evaluating different rate control therapies in permanent atrial fibrillation: A prospective, randomised, open-label, blinded endpoint trial comparing digoxin and beta-blockers as initial rate control therapy

Rate control Therapy Evaluation in Atrial Fibrillation:

RATE-AF

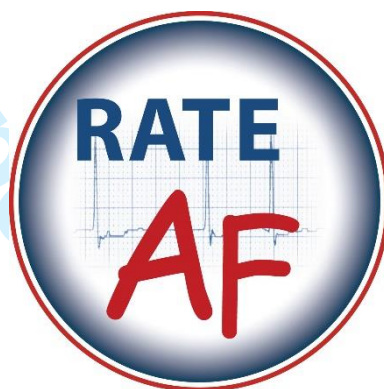

RATE-AF TRIAL PROTOCOL

Version 1.0, 23<sup>rd</sup> March 2016

|                            |                                                                                |
|----------------------------|--------------------------------------------------------------------------------|
| <b>Sponsor:</b>            | University of Birmingham                                                       |
| <b>Chief Investigator:</b> | Dr Dipak Kotecha                                                               |
| <b>Coordinating Unit:</b>  | Birmingham Clinical Trials Unit                                                |
| <b>Funder:</b>             | National Institute for Health Research (NIHR)<br>Career Development Fellowship |
| <b>ISRCTN:</b>             | TBC                                                                            |
| <b>EudraCT No.:</b>        | 2015-005043-13                                                                 |
| <b>REC Ref. No.:</b>       | TBC                                                                            |

UNIVERSITY OF  
BIRMINGHAM

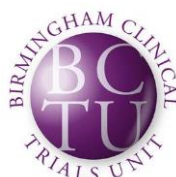

**NHS**  
National Institute for  
Health Research

## TRIAL COMMITTEES AND CONTACT DETAILS

### Trial Management Group

|                              |                                                                                                                                                                                                                                                                                                                             |
|------------------------------|-----------------------------------------------------------------------------------------------------------------------------------------------------------------------------------------------------------------------------------------------------------------------------------------------------------------------------|
| <b>Chief Investigator</b>    | <b>NIHR Career Development Fellow &amp; Clinician Scientist</b>                                                                                                                                                                                                                                                             |
| <b>Dr Dipak Kotecha</b>      | Institute of Cardiovascular Sciences, University of Birmingham, The Medical School, Vincent Drive, Birmingham, B15 2TT, UK<br>Email: <a href="mailto:d.kotecha@bham.ac.uk">d.kotecha@bham.ac.uk</a><br>Telephone: 07974 115676                                                                                              |
| <b>Prof Paulus Kirchhof</b>  | <b>Professor of Cardiovascular Medicine</b><br>Institute of Cardiovascular Sciences, University of Birmingham, Institute of Biomedical Research, Vincent Drive, Birmingham B15 2TT, UK<br>Email: <a href="mailto:p.kirchhof@bham.ac.uk">p.kirchhof@bham.ac.uk</a><br>Telephone: 0121 414 7042                               |
| <b>Dr Michael Griffith</b>   | <b>Consultant Electrophysiologist</b><br>University Hospitals Birmingham NHS Trust, Nuffield House, Queen Elizabeth Hospital, Birmingham, B15 2TH, UK<br>Email: <a href="mailto:michael.griffith@uhb.nhs.uk">michael.griffith@uhb.nhs.uk</a><br>Telephone: 0121 371 4038                                                    |
| <b>Prof Gregory Y H Lip</b>  | <b>Professor of Cardiovascular Medicine &amp; Director, Haemostasis Thrombosis &amp; Vascular Biology Unit</b><br>Institute of Cardiovascular Sciences, University of Birmingham, City Hospital, Birmingham, B18 7QH, UK<br>Email <a href="mailto:g.y.h.lip@bham.ac.uk">g.y.h.lip@bham.ac.uk</a><br>Telephone: 0121 5075080 |
| <b>Prof Jonathan Townend</b> | <b>Professor of Cardiology</b><br>University Hospitals Birmingham NHS Trust, Nuffield House, Queen Elizabeth Hospital, Birmingham, B15 2TH, UK<br>Email: <a href="mailto:john.townend@uhb.nhs.uk">john.townend@uhb.nhs.uk</a><br>Telephone: 0121 371 4623                                                                   |
| <b>Dr Rick Steeds</b>        | <b>Consultant Cardiologist and Head of Cardiac Imaging</b><br>University Hospitals Birmingham NHS Trust, Nuffield House, Queen Elizabeth Hospital, Birmingham, B15 2TH, UK<br>Email: <a href="mailto:rick.steeds@uhb.nhs.uk">rick.steeds@uhb.nhs.uk</a><br>Telephone: 0121 371 6130                                         |
| <b>Prof Melanie Calvert</b>  | <b>Professor of Outcomes Methodology</b><br>Institute of Applied Health Research, University of Birmingham, Birmingham, B15 2TT, UK<br>Email: <a href="mailto:m.calvert@bham.ac.uk">m.calvert@bham.ac.uk</a><br>Telephone: 0121 414 8595                                                                                    |
| <b>Dr Susan Jowett</b>       | <b>Senior Lecturer, Health Economics</b><br>Institute of Applied Health Research, University of Birmingham, Birmingham, B15 2TT, UK<br>Email <a href="mailto:s.jowett@bham.ac.uk">s.jowett@bham.ac.uk</a><br>Telephone: 0121 414 7898                                                                                       |
| <b>Dr Jonathan Mathers</b>   | <b>Senior Lecturer, Qualitative and Mixed Methods Applied Health Research</b><br>Institute of Applied Health Research, University of Birmingham, Birmingham, B15 2TT, UK<br>Email <a href="mailto:j.m.mathers@bham.ac.uk">j.m.mathers@bham.ac.uk</a><br>Telephone: 0121 414 6024                                            |

| <b>Birmingham Clinical Trials Unit</b>                |                                                                                                                                                                                                                                                                                                                                                                                         |
|-------------------------------------------------------|-----------------------------------------------------------------------------------------------------------------------------------------------------------------------------------------------------------------------------------------------------------------------------------------------------------------------------------------------------------------------------------------|
| <b>Prof Jon Deeks</b>                                 | <b>Professor of Biostatistics and Director, BCTU</b><br><br>Birmingham Clinical Trials Unit, University of Birmingham, Birmingham, B15 2TT, UK<br>Email <a href="mailto:j.deeks@bham.ac.uk">j.deeks@bham.ac.uk</a><br>Telephone: 0121 414 5328                                                                                                                                          |
| <b>Dr Margaret Grant</b>                              | <b>Operations Manager</b><br><br>Birmingham Clinical Trials Unit, University of Birmingham, Birmingham, B15 2TT, UK<br>Email <a href="mailto:m.r.grant@bham.ac.uk">m.r.grant@bham.ac.uk</a><br>Telephone: 0121 415 9106                                                                                                                                                                 |
| <b>Gemma Slinn</b>                                    | <b>Senior Trial Coordinator</b><br><br>Birmingham Clinical Trials Unit, University of Birmingham, Birmingham, B15 2TT, UK<br>Email <a href="mailto:g.slinn@bham.ac.uk">g.slinn@bham.ac.uk</a><br>Telephone: 0121 415 8445                                                                                                                                                               |
| <b>Samir Mehta</b>                                    | <b>Statistician</b><br><br>Birmingham Clinical Trials Unit, University of Birmingham, Birmingham, B15 2TT, UK<br>Email <a href="mailto:s.mehta.1@bham.ac.uk">s.mehta.1@bham.ac.uk</a><br>Telephone: 0121 415 9117                                                                                                                                                                       |
| <b>Trial Oversight Committee</b>                      |                                                                                                                                                                                                                                                                                                                                                                                         |
| <b><u>Co-Chairs</u></b>                               |                                                                                                                                                                                                                                                                                                                                                                                         |
| <b>Dr Kazem Rahimi</b>                                | <b>Associate Professor of Cardiovascular Medicine, University of Oxford<br/>Deputy Director, The George Institute for Global Health</b><br><br>The George Institute for Global Health, University of Oxford, 34 Broad Street, Oxford OX1 3BD, UK<br>Email: <a href="mailto:kazem.rahimi@georgeinstitute.ox.ac.uk">kazem.rahimi@georgeinstitute.ox.ac.uk</a><br>Telephone: 01865 617 201 |
| <b>Prof. John Camm</b>                                | <b>BHF Professor of Clinical Cardiology</b><br><br>St George's University of London, Cranmer Terrace, London SW17 0RE, UK<br>Email: <a href="mailto:jcamm@sgul.ac.uk">jcamm@sgul.ac.uk</a><br>Telephone: 0208 725 3414                                                                                                                                                                  |
| <b><u>Patient Representative</u></b>                  |                                                                                                                                                                                                                                                                                                                                                                                         |
| <b>Mary Stanbury</b>                                  | Lead PPI Representative<br>Email: <a href="mailto:dms27@btinternet.com">dms27@btinternet.com</a>                                                                                                                                                                                                                                                                                        |
| <b><u>On behalf of the Trial Management Group</u></b> |                                                                                                                                                                                                                                                                                                                                                                                         |
| <b>Dr Dipak Kotecha</b>                               |                                                                                                                                                                                                                                                                                                                                                                                         |
| <b>Prof. Jon Deeks</b>                                | For contact details, see Trial Management Group                                                                                                                                                                                                                                                                                                                                         |
| <b>Prof. Paulus Kirchhof</b>                          |                                                                                                                                                                                                                                                                                                                                                                                         |

1  
2  
3  
4  
5  
6  
7  
8  
9  
10  
11  
12  
13  
14  
15  
16  
17  
18  
19  
20  
21  
22  
23  
24  
25  
26  
27  
28  
29  
30  
31  
32  
33  
34  
35  
36  
37  
38  
39  
40  
41  
42  
43  
44  
45  
46  
47  
48  
49  
50  
51  
52  
53  
54  
55  
56  
57  
58  
59  
60

**RATE-AF Trial Office**

For general protocol related queries and supply of trial materials:

Birmingham Clinical Trials Unit (BCTU), Institute of Applied Health Research, College of Medical & Dental Sciences, Public Health Building, University of Birmingham, Edgbaston, Birmingham B15 2TT

Telephone: 0121 415 8445  
 Fax: 0121 415 9135  
 Email: RATE-AF@trials.bham.ac.uk  
 Website: www.birmingham.ac.uk/RATE-AF

**Randomisation**

Telephone: 0800 953 0274

Website: <https://www.birmingham.ac.uk/RATEAF>

**Safety Reporting**

Fax SAE Forms to: 0121 415 9135 or 0121 415 9136

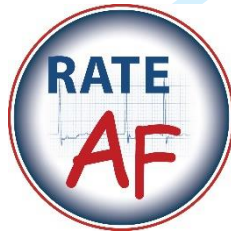

**Protocol Development and Sign Off**

| Protocol Amendments                                                                                                                            |                   |                         |                   |                      |
|------------------------------------------------------------------------------------------------------------------------------------------------|-------------------|-------------------------|-------------------|----------------------|
| The following amendments and/ or administrative changes have been made to this protocol since the implementation of the first approved version |                   |                         |                   |                      |
| Amendment number                                                                                                                               | Date of amendment | Protocol version number | Type of amendment | Summary of amendment |
|                                                                                                                                                |                   |                         |                   |                      |

1  
2  
3  
4  
5  
6  
7  
8  
9  
10  
11  
12  
13  
14  
15  
16  
17  
18  
19  
20  
21  
22  
23  
24  
25  
26  
27  
28  
29  
30  
31  
32  
33  
34  
35  
36  
37  
38  
39  
40  
41  
42  
43  
44  
45  
46  
47  
48  
49  
50  
51  
52  
53  
54  
55  
56  
57  
58  
59  
60

## Chief Investigator Signature Page

Trial Name: **RATE-AF**

Protocol Version Number: Version: \_\_ \_\_

Protocol Version Date: \_\_ \_\_ / \_\_ \_\_ \_\_ / \_\_ \_\_ \_\_ \_\_

### This protocol has been approved by:

CI Name: Dr Dipak Kotecha

Trial Role: Chief Investigator

Signature and date: \_\_\_\_\_ \_\_ \_\_ / \_\_ \_\_ \_\_ / \_\_ \_\_ \_\_ \_\_

## Sponsor Statement

Where the University of Birmingham takes on the sponsor role for protocol development oversight, the signing of the IRAS form by the Sponsor will serve as confirmation of the approval of this protocol.



## Principal Investigator Signature Page

### Principal Investigator:

I have read and agree to the protocol, as detailed in this document. I agree to adhere to the protocol as outlined and agree that any suggested changes to the protocol must be approved by the Trial Oversight Committee prior to seeking approval from the Research Ethics Committee and Regulatory Authority.

I am aware of my responsibilities as an Investigator under the guidelines of Good Clinical Practice (GCP), the Declaration of Helsinki, local regulations (as applicable) and the trial protocol and I agree to conduct the trial according to these guidelines and to appropriately direct and assist the staff under my control, who will be involved in the trial.

Trial Name: **RATE-AF**

Protocol Version Number:      Version: \_\_\_\_\_

Protocol Version Date:    \_\_\_ / \_\_\_ / \_\_\_

PI Name:                      <Enter>

Trial Role:                  Principal Investigator

Signature and date:                      \_\_\_\_\_ / \_\_\_ / \_\_\_

The Principal Investigator should sign this page and return a copy to the RATE-AF Trial Office

## Table of Contents

|          |                                                           |           |
|----------|-----------------------------------------------------------|-----------|
| <b>1</b> | <b>Trial Summary</b> .....                                | <b>13</b> |
| 1.1      | Trial Schema .....                                        | 15        |
| <b>2</b> | <b>Introduction</b> .....                                 | <b>16</b> |
| 2.1      | Background .....                                          | 16        |
| 2.2      | Epidemiology and Consequences of AF .....                 | 16        |
| 2.3      | Rhythm-Control in AF .....                                | 17        |
| 2.4      | Lack of Evidence to Guide Rate-Control Therapy .....      | 17        |
| 2.5      | Patient Wellbeing .....                                   | 19        |
| 2.6      | Rationale for the RATE-AF Trial .....                     | 19        |
| <b>3</b> | <b>Trial Design and Objectives</b> .....                  | <b>20</b> |
| 3.1      | Hypothesis .....                                          | 20        |
| 3.2      | Primary objective .....                                   | 21        |
| 3.3      | Secondary objectives .....                                | 21        |
| 3.4      | Feasibility objectives .....                              | 21        |
| 3.5      | Exploratory objectives .....                              | 21        |
| <b>4</b> | <b>Selection of Participants</b> .....                    | <b>22</b> |
| 4.1      | Inclusion Criteria .....                                  | 22        |
| 4.2      | Exclusion Criteria .....                                  | 22        |
| <b>5</b> | <b>Informed Consent Process</b> .....                     | <b>23</b> |
| <b>6</b> | <b>Enrolment and Randomisation</b> .....                  | <b>24</b> |
| 6.1      | Randomisation Procedures .....                            | 25        |
| <b>7</b> | <b>Trial Treatment</b> .....                              | <b>26</b> |
| 7.1      | Treatment .....                                           | 26        |
| 7.2      | Treatment Supply and Storage .....                        | 26        |
| 7.3      | Dosing Schedule .....                                     | 27        |
| 7.4      | Drug Interactions and Contraindications .....             | 27        |
| 7.5      | Accountability Procedures and Labelling .....             | 29        |
| 7.6      | Treatment Modification .....                              | 29        |
| 7.7      | Assessment of Compliance .....                            | 30        |
| <b>8</b> | <b>Trial Procedures and Schedule of Assessments</b> ..... | <b>30</b> |
| 8.1      | Baseline Visit .....                                      | 30        |

1  
2  
3  
4  
5  
6  
7  
8  
9  
10  
11  
12  
13  
14  
15  
16  
17  
18  
19  
20  
21  
22  
23  
24  
25  
26  
27  
28  
29  
30  
31  
32  
33  
34  
35  
36  
37  
38  
39  
40  
41  
42  
43  
44  
45  
46  
47  
48  
49  
50  
51  
52  
53  
54  
55  
56  
57  
58  
59  
60

8.2 Up-Titration Visits ..... 31

8.3 Visit 2, Month 6..... 31

8.4 Visit 3, Month 12 (Final Trial Assessment)..... 32

8.5 Investigator-blinded Endpoints ..... 32

8.6 Long Term Follow-Up ..... 32

8.7 Withdrawal ..... 33

8.8 Trial Duration..... 33

**9 Trial Procedures..... 35**

9.1 Procedures Defined as Standard Clinical Care..... 35

9.2 Medical History ..... 35

9.3 Medication History ..... 35

9.4 Physical Examination ..... 36

9.5 Patient Reported Outcomes ..... 36

9.5.1 Choice of Outcomes and Qualitative Research..... 36

9.5.2 Data Collection for PROMs..... 37

9.5.3 Outcome Appraisal ..... 38

9.6 Transthoracic Echocardiography ..... 38

9.6.1 Reproducibility and Validity of Measurements ..... 38

9.6.2 Systolic LV Function ..... 38

9.6.3 Diastolic LV Function..... 39

9.6.4 Left Atrial Size and Function..... 40

9.6.5 Additional Echocardiography Parameters..... 40

9.7 Laboratory Evaluations..... 40

9.7.1 Laboratory Assays..... 41

9.7.2 Cellular Response to Rate Control ..... 41

9.7.3 Stored Blood Samples..... 41

9.7.4 Specimen Preparation, Handling, Storage and Shipment ..... 41

9.8 Economic Evaluation ..... 41

**10 Pharmacovigilance ..... 43**

10.1 Recording and Assessment of Adverse Events ..... 43

10.2 Non-Serious Adverse Events/ Adverse Reactions ..... 45

10.3 Serious Adverse Events ..... 45

|    |           |                                                        |
|----|-----------|--------------------------------------------------------|
| 1  |           |                                                        |
| 2  |           |                                                        |
| 3  | 10.3.1    | Expected SAEs NOT to be Reported on a SAE Form..... 45 |
| 4  | 10.4      | SUSARs ..... 45                                        |
| 5  | 10.5      | Development Safety Update Reports..... 46              |
| 6  | 10.6      | Annual Progress Reports..... 46                        |
| 7  | 10.7      | Pregnancy ..... 46                                     |
| 8  | 10.8      | Reporting Urgent Safety Measures..... 46               |
| 9  |           |                                                        |
| 10 | <b>11</b> | <b>Quality Control and Quality Assurance..... 47</b>   |
| 11 |           |                                                        |
| 12 | 11.1      | Site Set-Up and Initiation ..... 47                    |
| 13 | 11.2      | Central Monitoring ..... 47                            |
| 14 | 11.3      | Audit and Inspection ..... 47                          |
| 15 | 11.4      | Notification of Serious Breaches..... 48               |
| 16 | 11.5      | Data Handling and Analysis..... 48                     |
| 17 | 11.6      | End of Trial..... 49                                   |
| 18 | 11.7      | Archiving ..... 49                                     |
| 19 |           |                                                        |
| 20 | <b>12</b> | <b>Statistical Considerations ..... 50</b>             |
| 21 |           |                                                        |
| 22 | 12.1      | Outcome measures ..... 50                              |
| 23 | 12.1.1    | Primary Outcome ..... 50                               |
| 24 | 12.1.2    | Secondary Outcomes ..... 50                            |
| 25 | 12.1.3    | Feasibility Outcomes ..... 50                          |
| 26 | 12.2      | Power Calculations..... 51                             |
| 27 | 12.3      | Statistical analysis ..... 51                          |
| 28 | 12.3.1    | Primary outcome analysis..... 52                       |
| 29 | 12.3.2    | Feasibility and Secondary outcomes analysis..... 52    |
| 30 | 12.3.3    | Missing data and sensitivity analyses ..... 52         |
| 31 | 12.3.4    | Interim analyses and Stopping rules..... 52            |
| 32 | 12.4      | Final analysis..... 53                                 |
| 33 |           |                                                        |
| 34 | <b>13</b> | <b>Ethics and Regulatory Requirements..... 53</b>      |
| 35 |           |                                                        |
| 36 | <b>14</b> | <b>Oversight Committees..... 53</b>                    |
| 37 |           |                                                        |
| 38 | 14.1      | Trial Management Group..... 53                         |
| 39 | 14.2      | Trial Oversight Committee ..... 54                     |
| 40 | 14.3      | Protocol amendments..... 54                            |
| 41 |           |                                                        |
| 42 | <b>15</b> | <b>Finance ..... 54</b>                                |
| 43 |           |                                                        |
| 44 |           |                                                        |
| 45 |           |                                                        |
| 46 |           |                                                        |
| 47 |           |                                                        |
| 48 |           |                                                        |
| 49 |           |                                                        |
| 50 |           |                                                        |
| 51 |           |                                                        |
| 52 |           |                                                        |
| 53 |           |                                                        |
| 54 |           |                                                        |
| 55 |           |                                                        |
| 56 |           |                                                        |
| 57 |           |                                                        |
| 58 |           |                                                        |
| 59 |           |                                                        |
| 60 |           |                                                        |

1  
2  
3 **16 Confidentiality and Data Protection..... 54**  
4  
5 **17 Insurance and Indemnity ..... 55**  
6  
7 **18 Dissemination and Publication ..... 55**  
8  
9 **19 Statement of Compliance ..... 56**  
10  
11 **20 References ..... 57**  
12  
13 **Appendix A: Randomised treatment arm - Digoxin**  
14 **Appendix B: Randomised treatment arm - Bisoprolol**  
15  
16  
17  
18  
19  
20  
21  
22  
23  
24  
25  
26  
27  
28  
29  
30  
31  
32  
33  
34  
35  
36  
37  
38  
39  
40  
41  
42  
43  
44  
45  
46  
47  
48  
49  
50  
51  
52  
53  
54  
55  
56  
57  
58  
59  
60

For peer review only

## List of Abbreviations

|                    |                                                                   |
|--------------------|-------------------------------------------------------------------|
| <b>ABPI</b>        | Association of the British Pharmaceutical Industry                |
| <b>AE</b>          | Adverse Event                                                     |
| <b>AF</b>          | Atrial Fibrillation                                               |
| <b>BCTU</b>        | Birmingham Clinical Trials Unit                                   |
| <b>BNP</b>         | B-type Natriuretic Peptide                                        |
| <b>BPM</b>         | Beats per Minute                                                  |
| <b>CCB</b>         | Calcium Channel Blocker                                           |
| <b>CI</b>          | Chief Investigator                                                |
| <b>CMR</b>         | Cardiac Magnetic Resonance                                        |
| <b>CRF</b>         | Case Report Form                                                  |
| <b>CTA</b>         | Clinical Trial Authorisation                                      |
| <b>CTIMP</b>       | Clinical Trial of Medicinal Product                               |
| <b>DIBD</b>        | Developmental International Birth Date                            |
| <b>DMC</b>         | Data Monitoring Committee                                         |
| <b>DSUR</b>        | Developmental Safety Update Report                                |
| <b>DT</b>          | Deceleration Time                                                 |
| <b>ECG</b>         | Electrocardiogram                                                 |
| <b>EHRA</b>        | European Heart Rhythm Association                                 |
| <b>EU</b>          | European Union                                                    |
| <b>EudraCT No.</b> | European Union Drug Regulating Authorities Clinical Trials Number |
| <b>GCP</b>         | Good Clinical Practice                                            |
| <b>GFR</b>         | Glomerular Filtration Rate                                        |
| <b>GP</b>          | General Practitioner                                              |
| <b>HF</b>          | Heart Failure                                                     |
| <b>HR</b>          | Hazard Ratio                                                      |
| <b>IMP</b>         | Investigational Medicinal Product                                 |
| <b>INR</b>         | International Normalised Ratio                                    |
| <b>ISRCTN</b>      | International Standard Randomised Controlled Trial Number         |
| <b>IVRT</b>        | Isovolumic Relaxation Time                                        |
| <b>LA</b>          | Left-Atrial                                                       |
| <b>LV</b>          | Left-Ventricular                                                  |
| <b>LVEDD</b>       | Left-Ventricle End-Diastolic Dimension                            |
| <b>LVEDV</b>       | Left-Ventricle End-Diastolic Volume                               |
| <b>LVEF</b>        | Left-Ventricular Ejection Fraction                                |

|    |                |                                                                                        |
|----|----------------|----------------------------------------------------------------------------------------|
| 1  |                |                                                                                        |
| 2  |                |                                                                                        |
| 3  | <b>LVESD</b>   | Left-Ventricle End-Systolic Dimension                                                  |
| 4  | <b>LVESV</b>   | Left-Ventricle End-Systolic Volume                                                     |
| 5  |                |                                                                                        |
| 6  | <b>LVSD</b>    | Left-Ventricular Systolic Dysfunction                                                  |
| 7  |                |                                                                                        |
| 8  | <b>MHRA</b>    | Medicines and Healthcare Products Regulatory Agency                                    |
| 9  | <b>MREC</b>    | Main Research Ethics Committee                                                         |
| 10 |                |                                                                                        |
| 11 | <b>NHS</b>     | National Health Service                                                                |
| 12 | <b>NICE</b>    | National Institute of Clinical Excellence                                              |
| 13 |                |                                                                                        |
| 14 | <b>NOAC</b>    | Novel Oral Anticoagulants                                                              |
| 15 |                |                                                                                        |
| 16 | <b>NYHA</b>    | New York Health Association                                                            |
| 17 | <b>PEF</b>     | Preserved Ejection Fraction                                                            |
| 18 |                |                                                                                        |
| 19 | <b>PI</b>      | Principal Investigator                                                                 |
| 20 |                |                                                                                        |
| 21 | <b>PIC</b>     | Patient Identification Centre                                                          |
| 22 | <b>PIL</b>     | Participant Information Leaflet                                                        |
| 23 |                |                                                                                        |
| 24 | <b>PROBE</b>   | Prospective Randomised Open Blinded End-point                                          |
| 25 | <b>QALY</b>    | Quality-Adjusted Life Year                                                             |
| 26 |                |                                                                                        |
| 27 | <b>QoL</b>     | Quality of Life                                                                        |
| 28 |                |                                                                                        |
| 29 | <b>R&amp;D</b> | Research and Development                                                               |
| 30 | <b>RCT</b>     | Randomised Controlled Trial                                                            |
| 31 |                |                                                                                        |
| 32 | <b>REC</b>     | Research Ethics Committee                                                              |
| 33 | <b>SAE</b>     | Serious Adverse Event                                                                  |
| 34 |                |                                                                                        |
| 35 | <b>SAR</b>     | Serious Adverse Reaction                                                               |
| 36 |                |                                                                                        |
| 37 | <b>SD</b>      | Standard Deviation                                                                     |
| 38 | <b>SmPC</b>    | Summary of Product Characteristics                                                     |
| 39 |                |                                                                                        |
| 40 | <b>SUSAR</b>   | Suspected Unexpected Serious Adverse Reaction                                          |
| 41 |                |                                                                                        |
| 42 | <b>TAPSE</b>   | Tricuspid Annular Plane Systolic Excursion                                             |
| 43 | <b>TDI</b>     | Tissue Doppler Imaging                                                                 |
| 44 |                |                                                                                        |
| 45 | <b>TMF</b>     | Trial Master File                                                                      |
| 46 |                |                                                                                        |
| 47 | <b>TMG</b>     | Trial Management Group                                                                 |
| 48 | <b>TSC</b>     | Trial Steering Committee                                                               |
| 49 |                |                                                                                        |
| 50 | <b>UHB</b>     | University Hospitals Birmingham                                                        |
| 51 |                |                                                                                        |
| 52 | <b>WTCRF</b>   | NIHR Wellcome Trust Clinical Research Facility at Queen Elizabeth Hospital, Birmingham |
| 53 |                |                                                                                        |
| 54 |                |                                                                                        |
| 55 |                |                                                                                        |
| 56 |                |                                                                                        |
| 57 |                |                                                                                        |
| 58 |                |                                                                                        |
| 59 |                |                                                                                        |
| 60 |                |                                                                                        |

# 1 Trial Summary

|                          |                                                                                                                                                                                                                                                                                                                                                                                                                                                                                                                                                                                                                                                                                                                                                                                                                                                                                                                                                                                                                                                                                                                                                                                                                                                                                                                                                                                                                                                                                                                     |
|--------------------------|---------------------------------------------------------------------------------------------------------------------------------------------------------------------------------------------------------------------------------------------------------------------------------------------------------------------------------------------------------------------------------------------------------------------------------------------------------------------------------------------------------------------------------------------------------------------------------------------------------------------------------------------------------------------------------------------------------------------------------------------------------------------------------------------------------------------------------------------------------------------------------------------------------------------------------------------------------------------------------------------------------------------------------------------------------------------------------------------------------------------------------------------------------------------------------------------------------------------------------------------------------------------------------------------------------------------------------------------------------------------------------------------------------------------------------------------------------------------------------------------------------------------|
| Title                    | <p>Evaluating different rate control therapies in permanent atrial fibrillation: A prospective, randomised, open-label, blinded endpoint trial comparing digoxin and beta-blockers as initial rate control therapy</p> <p><u>R</u>Ate control <u>T</u>herapy <u>E</u>valuation in <u>A</u>trial <u>F</u>ibrillation: RATE-AF</p>                                                                                                                                                                                                                                                                                                                                                                                                                                                                                                                                                                                                                                                                                                                                                                                                                                                                                                                                                                                                                                                                                                                                                                                    |
| Acronym                  | RATE-AF                                                                                                                                                                                                                                                                                                                                                                                                                                                                                                                                                                                                                                                                                                                                                                                                                                                                                                                                                                                                                                                                                                                                                                                                                                                                                                                                                                                                                                                                                                             |
| Trial Design and Methods | <p>A prospective, randomised, open-label, blinded-endpoint (PROBE) trial design. The RATE-AF trial combines hypothesis testing (quality of life, cardiac function, exercise capacity and biomarkers), evaluation of measures (validity, reproducibility and correlation of outcomes) and a feasibility study for a future clinical event trial (assessing recruitment, retention and sample size).</p>                                                                                                                                                                                                                                                                                                                                                                                                                                                                                                                                                                                                                                                                                                                                                                                                                                                                                                                                                                                                                                                                                                              |
| Trial Medications        | <p>Digoxin 62.5 – 250 µg od<br/>Bisoprolol 1.25 – 15 mg od</p>                                                                                                                                                                                                                                                                                                                                                                                                                                                                                                                                                                                                                                                                                                                                                                                                                                                                                                                                                                                                                                                                                                                                                                                                                                                                                                                                                                                                                                                      |
| Trial Outcomes           | <p><b>Primary Outcome:</b></p> <p>Patient-reported quality of life (QoL): SF-36 physical component summary score at six months</p> <p><b>Secondary Outcomes:</b></p> <p>Patient-reported QoL:</p> <ul style="list-style-type: none"> <li>• SF-36 global and domain-specific scores at 6 and 12 months</li> <li>• EQ-5D-5L summary index and visual analogue scale at six and twelve months</li> <li>• AFEQT overall score at six and twelve months</li> </ul> <p>Cardiac function:</p> <ul style="list-style-type: none"> <li>• Echocardiographic LVEF at 12 months</li> <li>• Diastolic function (E/e' and composite of diastolic indices) at 12 months</li> </ul> <p>Functional assessment:</p> <ul style="list-style-type: none"> <li>• Six-minute walking distance at 6 and 12 months</li> <li>• Change in European Heart Rhythm Association (EHRA) class at 6 and 12 months</li> </ul> <p>Biomarkers:</p> <ul style="list-style-type: none"> <li>• Change in B-type natriuretic peptide (BNP) levels at 6 months</li> </ul> <p>Change in heart rate using 24-hour ambulatory ECG</p> <p><b>Feasibility Outcomes:</b></p> <p>Recruitment target of 3 patients per week across all participating centres.</p> <p>Compliance and reasons for non-compliance</p> <p>Number of withdrawals and losses to follow-up (with reasons)</p> <p>Drug discontinuation rate and adverse reactions requiring drug discontinuation.</p> <p>Number of patients needing therapy-induced requirement for additional treatment</p> |



|                                           |                                                                                                                                                                                                                                                                                                                                                                                                                                                                                                                                                                                                                                                                                                                                                                                                                                                                                                                                                                                                                                                                                                                                                                                                                                                                                                                                                                                                                                                                                                                                                                                                                                                                                                                                                                                                            |
|-------------------------------------------|------------------------------------------------------------------------------------------------------------------------------------------------------------------------------------------------------------------------------------------------------------------------------------------------------------------------------------------------------------------------------------------------------------------------------------------------------------------------------------------------------------------------------------------------------------------------------------------------------------------------------------------------------------------------------------------------------------------------------------------------------------------------------------------------------------------------------------------------------------------------------------------------------------------------------------------------------------------------------------------------------------------------------------------------------------------------------------------------------------------------------------------------------------------------------------------------------------------------------------------------------------------------------------------------------------------------------------------------------------------------------------------------------------------------------------------------------------------------------------------------------------------------------------------------------------------------------------------------------------------------------------------------------------------------------------------------------------------------------------------------------------------------------------------------------------|
|                                           | Population-specific standard deviations (SD) and proportions: <ul style="list-style-type: none"> <li>SD of SF36 physical functioning score at 6 and 12 months</li> <li>SD of SF36 overall score at 6 and 12 months</li> <li>SD of AFEQT overall score at 6 and 12 months</li> <li>SD of LVEF and E/e' scores at 6 and 12 months</li> <li>Unplanned hospitalisation admissions rates</li> </ul>                                                                                                                                                                                                                                                                                                                                                                                                                                                                                                                                                                                                                                                                                                                                                                                                                                                                                                                                                                                                                                                                                                                                                                                                                                                                                                                                                                                                             |
|                                           | Cardiovascular Events (particularly mortality, thromboembolic events, myocardial infarction and cardiovascular interventions)                                                                                                                                                                                                                                                                                                                                                                                                                                                                                                                                                                                                                                                                                                                                                                                                                                                                                                                                                                                                                                                                                                                                                                                                                                                                                                                                                                                                                                                                                                                                                                                                                                                                              |
| <b>Trial Duration per Participant</b>     | 12 months of trial therapy                                                                                                                                                                                                                                                                                                                                                                                                                                                                                                                                                                                                                                                                                                                                                                                                                                                                                                                                                                                                                                                                                                                                                                                                                                                                                                                                                                                                                                                                                                                                                                                                                                                                                                                                                                                 |
| <b>Planned Trial Sites</b>                | Multiple screening sites with single site recruitment                                                                                                                                                                                                                                                                                                                                                                                                                                                                                                                                                                                                                                                                                                                                                                                                                                                                                                                                                                                                                                                                                                                                                                                                                                                                                                                                                                                                                                                                                                                                                                                                                                                                                                                                                      |
| <b>Total Number of Participants</b>       | 160                                                                                                                                                                                                                                                                                                                                                                                                                                                                                                                                                                                                                                                                                                                                                                                                                                                                                                                                                                                                                                                                                                                                                                                                                                                                                                                                                                                                                                                                                                                                                                                                                                                                                                                                                                                                        |
| <b>Main Inclusion/ Exclusion Criteria</b> | <p><b><u>Inclusion Criteria</u></b></p> <p>Adult patients, aged 60 years or older</p> <p>Permanent AF, characterised (at time of randomisation) as a physician decision for rate-control with no plans for cardioversion, anti-arrhythmic medication, or ablation therapy</p> <p>Symptoms of breathlessness (New York Heart Association Class II or more)</p> <p>Able to provide written, informed consent</p> <p><b><u>Exclusion Criteria</u></b></p> <p>Established indication for beta-blocker therapy, e.g. myocardial infarction in the last 6 months</p> <p>Known contraindications for therapy with beta-blockers or digoxin, e.g. a history of severe bronchospasm that would preclude use of beta-blockers, or known intolerance to these medications</p> <p>Baseline heart rate &lt;60 bpm</p> <p>History of second or third-degree heart block</p> <p>Supraventricular arrhythmias associated with accessory conducting pathways (e.g. Wolff-Parkinson-White syndrome) or a history of ventricular tachycardia or fibrillation</p> <p>Planned pacemaker implantation (including cardiac resynchronisation therapy), pacemaker-dependent rhythm or history of atrioventricular node ablation</p> <p>Decompensated heart failure (evidenced by need for intravenous inotropes, vasodilators or diuretics) within 14 days prior to randomisation</p> <p>A current diagnosis of obstructive hypertrophic cardiomyopathy, myocarditis or constrictive pericarditis</p> <p>Received or on waiting list for heart transplantation</p> <p>Receiving renal replacement therapy</p> <p>Major surgery, including thoracic or cardiac surgery, within 3 months of randomisation</p> <p>Severe, concomitant non-cardiovascular disease (including malignancy) that is expected to reduce life expectancy</p> |

## 1.1 Trial Schema

Figure 1

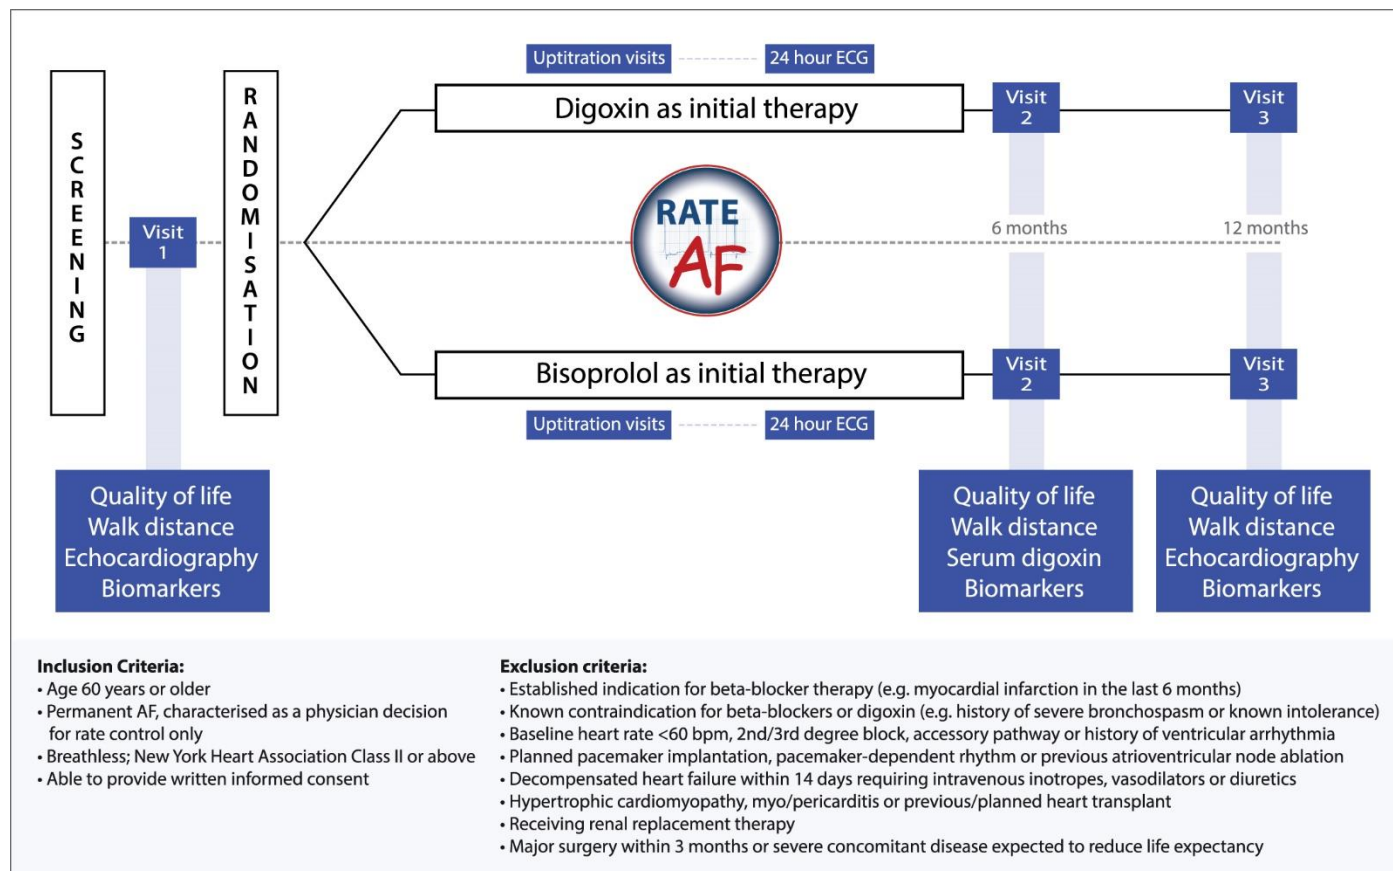

This protocol describes the **RATE-AF** trial only. The trial will be conducted in accordance with the protocol, Good Clinical Practice (GCP) and applicable regulatory requirements. Every care has been taken in the drafting of this protocol, but future amendments may be necessary, which will receive the required approvals prior to implementation.

## 2 Introduction

### 2.1 Background

Atrial fibrillation (AF) is an increasingly common cardiac condition that leads to a substantial burden on quality-of-life (QoL), an increased risk of cardiovascular events, hospitalisation and death, and significant healthcare costs for the NHS. In addition to anticoagulation and considerations for rhythm control therapy, most patients with AF are in need of pharmacological control of heart rate. This aspect of care has not received stringent investigation, with treatment guidelines based on small crossover studies and observational data rather than robust controlled trials.<sup>1-3</sup> Beta-blocker monotherapy remains the first-line option in the current NICE AF guidelines consultation document, with digoxin only for sedentary patients, although this recommendation is based on 'very low-quality evidence'.<sup>4</sup> The benefit of different rate-control therapies on symptoms and other intermediate outcomes (such as left-ventricular ejection fraction [LVEF] and diastolic function) are unknown, as are their effects on clinical events such as hospitalisation. This situation is unacceptable in light of the potential benefits and risk of different rate-control options in AF. It also limits our ability to personalise treatment according to patient characteristics.

The RAte control Therapy Evaluation in Atrial Fibrillation (**RATE-AF**) trial is informed by a number of in-depth systematic reviews of management and clinical outcomes in AF patients.<sup>5-11</sup> Taken together, this information provides a sound basis to plan a major randomised controlled trial (RCT).<sup>12, 13</sup> However as trials of rate-control in AF have typically been small or uncontrolled, further information is needed before designing a trial that can assess clinical outcomes. The **RATE-AF** trial will allow us to define appropriate primary and secondary outcome measures and their standard deviation in a contemporary population of patients with permanent AF. This information will allow us to estimate sample size, determination of recruitment, retention and adherence policies, and to ascertain the best methods of obtaining adverse event data and reliable economic costs for a larger trial assessing cardiovascular outcomes and hospitalisation. The **RATE-AF** trial will also be the largest RCT of its kind, allowing us to compare the effect of beta-blockers and digoxin on QoL as initial rate-control therapy in patients with permanent AF. The long-term aim of the research is to answer key questions about how to initiate therapy, stratified by relevant patient characteristics such as systolic and diastolic cardiac function, baseline symptoms and concurrent medication. The research will also define the pathophysiological mechanisms underlying AF-related symptoms, left-ventricular function and their association with adverse clinical outcomes, and to identify clinical markers for the response to different rate control therapy.

### 2.2 Epidemiology and Consequences of AF

AF is a common condition that is associated with increased rates of mortality and serious morbidity, including stroke, worsening of heart failure, sudden death, and reduced QoL.<sup>1</sup> The prevalence of AF increases with age, ranging from 0.7% in those aged 55–59 years to 17.8% in those aged above 85.<sup>14</sup> A doubling of both incidence and prevalence of AF is predicted in the next 20 years.<sup>15</sup>

1  
2  
3  
4 Patients with AF are twice as likely to be hospitalised as propensity score-matched controls, with  
5 direct medical costs estimated to be 73% higher.<sup>16</sup> Further, AF is an independent predictor of all-  
6 cause mortality, with a two-fold adjusted increase in death.<sup>17, 18</sup> While most strokes in AF can be  
7 prevented by oral anticoagulation, AF patients still have high cardiovascular death rates due to  
8 sudden death or progressive heart failure.<sup>19, 20</sup> Patients with AF also have significantly poorer  
9 QoL<sup>21</sup>, experiencing a variety of symptoms including lethargy, palpitations, dyspnoea, sleeping  
10 difficulties and psychosocial distress.<sup>22, 23</sup> In the context of patients diagnosed with heart failure,  
11 the presence of AF leads to higher rates of death and hospitalisation, independent of other risk  
12 variables or which condition comes first.<sup>24, 25</sup> From observational data, 40% of AF patients will be  
13 diagnosed with heart failure and vice-versa<sup>16</sup>, representing a large and growing unmet clinical  
14 need for healthcare improvement.  
15  
16  
17  
18  
19  
20

### 21 **2.3 Rhythm-Control in AF**

22  
23 Numerous large RCTs comparing rhythm-control (using arrhythmic drugs and/or cardioversion)  
24 versus rate-control have identified no significant difference in clinical outcomes in patients with  
25 persistent AF.<sup>26-30</sup> In a number of studies, hospitalisation rates were actually higher in those  
26 randomised to rhythm-control.<sup>26, 29, 30</sup> Similar findings have been shown in AF patients with heart  
27 failure<sup>31, 32</sup>, both in those with impaired and preserved ejection fraction.<sup>33-35</sup> Although AF ablation  
28 is becoming increasingly popular to restore sinus rhythm, it remains a highly invasive method to  
29 improve AF-related symptoms.<sup>36, 37</sup> At present, European and NICE treatment guidelines  
30 recommend ablation only in symptomatic paroxysmal AF, or as a treatment option in symptomatic  
31 persistent AF that is refractory to other therapy.<sup>3</sup> Further trials are currently underway to  
32 determine the clinical value of prompt rhythm-control, including the Early treatment of Atrial  
33 fibrillation for Stroke prevention Trial (EAST).<sup>38</sup> In light of the high recurrence rate of AF (even in  
34 patients receiving intensive rhythm-control therapy), rate-control is an important part of AF  
35 management in almost all patients. Unfortunately, rate-control therapy has much less evidence  
36 underpinning its use.  
37  
38  
39  
40  
41  
42  
43  
44

### 45 **2.4 Lack of Evidence to Guide Rate-Control Therapy**

46  
47 Rate-control in AF can be achieved with beta-blockers, non-dihydropyridine calcium-channel  
48 blockers (CCB), digoxin and their combinations. Unfortunately, little data exists to assist  
49 clinicians in choosing appropriate first-line and subsequent therapy. Current patterns of  
50 medication usage vary considerably (between and within countries). For example, in a worldwide  
51 registry, digoxin was prescribed in 2877 of 10,523 patients (27.3%), compared to 1599 of 3141  
52 (50.9%) of patients in the German Competence NETwork on Atrial Fibrillation (AFNET).<sup>39, 40</sup>  
53  
54  
55

56 Current European guidelines suggest “the choice of medication should be individualised and the  
57 dose modulated to avoid bradycardia”. This recommendation (Class 1, Level B) is based on a  
58 systematic review of trials addressing rate-control between 1983 and 1997.<sup>41</sup> Most of the studies  
59 included less than 50 participants (with several less than 10). The majority were low quality  
60 studies, as assessed by the risk of bias or confounding, and follow-up was typically in the order of

1  
2  
3 hours, days or weeks. Whilst this may be sufficient to assess an acute effect on heart-rate, it  
4 provides limited data on the longer-term effects of different treatments or the frequency of  
5 adverse reactions.  
6

7  
8 Beta-blockers are often preferred over other agents due to the prognostic benefit seen in patients  
9 with heart failure who are in sinus rhythm. However, in patients with heart failure, reduced LVEF  
10 and concomitant AF, we have shown that beta-blockers do not reduce mortality (hazard ratio  
11 0.97, 95% CI 0.83-1.14; p=0.73) or cardiovascular hospital admissions (hazard ratio 0.91; 95%  
12 CI 0.79-1.04; p=0.15).<sup>5</sup> This distinctly contrasts with the significant benefit seen in patients with  
13 sinus rhythm and highlights the need for further comparative RCTs specifically in patients with  
14 AF.  
15  
16  
17

18  
19 The most highly cited trial comparing beta-blockers and digoxin for rate-control in chronic AF was  
20 an open-label two-week crossover study of 5 drug regimes in 12 patients.<sup>42</sup> Peak heart-rate after  
21 exercise was significantly higher in those taking digoxin compared to beta-blockers but there  
22 were no differences in exercise duration. In a trial of 42 patients, rate-control was improved with  
23 combination beta-blocker/digoxin therapy compared to digoxin alone, however there were  
24 similarly no differences in exercise capacity.<sup>43</sup> Systematic review of other small randomised  
25 studies identify no difference in exercise tolerance with beta-blockers, despite a lowering of heart-  
26 rate.<sup>44</sup> From observational data, such as the Atrial Fibrillation Follow-up Investigation of Rhythm  
27 Management (AFFIRM) study, more cardiac and non-cardiac adverse effects have been noted  
28 with beta-blockers than digoxin (n=67 vs. n=38).<sup>28</sup> In a 3-week crossover study of 60  
29 participants, 10% withdrew during beta-blocker therapy due to adverse events.<sup>45</sup> Those in the  
30 beta-blocker group had a reduction in exercise capacity on cardio-pulmonary testing and a  
31 significant increase in B-type natriuretic peptide (BNP, a marker of ventricular strain) compared to  
32 patients treated with calcium-channel blockers.<sup>46</sup>  
33  
34  
35  
36  
37  
38  
39

40 Only a single RCT has been published comparing digoxin and beta-blockers in patients with AF  
41 and heart failure (mean LVEF 24%, n=47).<sup>47</sup> Although there was a marginally-significant  
42 improvement in LVEF with carvedilol/digoxin versus placebo/digoxin, blinded withdrawal of  
43 digoxin then led to a deterioration in LVEF, accompanied by an increase in BNP. There was no  
44 difference in the number of heart-rate pauses >3 seconds or in daytime/exercise heart-rate  
45 comparing the two therapies alone.  
46  
47  
48

49 Digoxin itself has been associated with an increased mortality in observational cohorts of AF  
50 patients<sup>48</sup>, however careful adjustment of baseline differences reject a true excess in adverse  
51 outcomes.<sup>49-51</sup> In a detailed systematic review of all studies published on digoxin, we identified  
52 that confounding was the main reason that digoxin was associated with increased mortality in  
53 observational studies, and confirmed a neutral association in RCTs (risk ratio 0.99, 95% CI 0.93  
54 to 1.05).<sup>6</sup> Lower rates of hospitalisation have been noted with digoxin therapy, independent of  
55 the type of heart failure<sup>52</sup>, however the lack of randomised data versus placebo (despite  
56 widespread clinical use) makes true comparison difficult. Small RCTs comparing CCB with  
57 digoxin have been inconsistent; two have identified lower heart-rates with CCB but no significant  
58 difference in exercise capacity<sup>42, 43</sup>, one demonstrated higher post-exercise cardiac output after  
59  
60

1  
2  
3 digoxin<sup>53</sup> and another showed improved exercise duration and QoL with CCB.<sup>54</sup> These results  
4 highlight the need for randomised data with appropriately-defined outcomes to accurately identify  
5 the benefits and risks of common therapies in patients with AF.  
6  
7

8 An example where RCT data have impacted on clinical practice is the Rate Control Efficacy in  
9 Permanent Atrial Fibrillation (RACE II) trial. This study challenged conventional wisdom that  
10 stricter control of heart-rate would allow time for diastolic filling and improve haemodynamics. In  
11 summary, 614 patients with permanent AF were randomised to strict or lenient rate-control and  
12 followed for 2-3 years.<sup>55</sup> There was no significant difference in the cumulative incidence of the  
13 composite primary outcome; 14.9% in the strict-control arm and 12.9% in the lenient-control  
14 group. There were also no differences in symptoms, New York Heart Association (NYHA) class  
15 or hospitalisations<sup>55, 56</sup>, no interaction with baseline heart failure<sup>57</sup>, and those participants  
16 achieving strict rate-control required more clinic visits and higher doses of medical therapy.<sup>58</sup>  
17 Current guidelines therefore suggest that lenient rate-control is acceptable, except for patients  
18 with adverse symptoms or clinical deterioration.<sup>1</sup> Whilst this study provides important data on the  
19 intensity of rate-control in AF, the more clinically-relevant questions of how to initiate therapy and  
20 the choice of optimal agents for individual patients remain unanswered.  
21  
22  
23  
24  
25  
26  
27

## 28 **2.5 Patient Wellbeing**

29  
30 Patient-reported outcomes are any report of a patient's health status (for example QoL) that is  
31 derived directly from the patient, without interpretation by a clinician.<sup>59</sup> There is limited data on  
32 the effect of pharmacological rate-control therapy on QoL and no comparative data assessing the  
33 benefit of different strategies.<sup>22, 60</sup> Rate-control has been associated with improved QoL scores in  
34 trials assessing rate versus rhythm-control.<sup>61, 62</sup> In the PIAF study, over 50% of participants  
35 randomised to calcium-channel blockers reported an improvement in health with significant  
36 benefits in the physical aspects of the SF-36.<sup>63</sup> A number of smaller studies have shown  
37 inconsistent effects on QoL in AF, although the data is limited by inclusion of patients with  
38 paroxysmal AF, a focus on heart rate and the use of a variety of QoL tools.  
39  
40  
41  
42  
43

44 Current QoL questionnaires can be divided into disease-specific evaluations or generic health  
45 assessments (such as the Short Form Health Survey SF-36<sup>64</sup> or the EuroQol EQ-5D<sup>65, 66</sup>).  
46 However there is a distinct lack of knowledge regarding the mechanisms that underpin AF-related  
47 symptoms, the responsiveness of QoL questionnaires and their validity.<sup>60</sup> The Atrial Fibrillation  
48 Effect on QualiTY-of-life (AFEQT) questionnaire was designed to address these disparities by  
49 using more robust methods.<sup>67</sup> Although there is limited clinical application to-date, AFEQT has  
50 demonstrated sensitivity to clinical change.<sup>68</sup> An important objective of the research is to  
51 ascertain appropriate and responsive QoL tools for this population, as well as determine the  
52 acceptability and delivery of the questionnaires to patients.  
53  
54  
55  
56  
57

## 58 **2.6 Rationale for the RATE-AF Trial**

59 Rate-control is an integral part of management in all AF patients but hardly any controlled trial  
60 evidence exists to guide the choice of agents. We have shown that neither beta-blockers nor

digoxin has an impact on mortality in AF patients, even with concomitant heart failure, which highlights the need to determine treatment effects on quality of life and cardiac function.

### 3 Trial Design and Objectives

**RATE-AF** is Prospective, Randomised Open-label Blinded Endpoint (PROBE) clinical trial comparing the use of digoxin and beta-blockers as initial rate control therapy.

In this section, we discuss the trial design and study objectives. Detailed outcome measures are listed in **Section 12**.

#### Justification for a PROBE rather than a Double Blind Trial Design

Although a double blind design would be the most robust trial design with respect to bias, it would not be ethical to do so in this scenario as clinicians would feel the need to add therapy according to heart rate. In addition, the RATE-AF Trial aims to test a strategy of initial care. PROBE trial design maintains the benefits associated with a strict randomisation procedure, while the blinded end points help to eliminate bias.

The trial design aims for a pragmatic 'all-comers' approach, applicable to those seen in clinical practice to allow transfer of the findings to routine clinical management of patients with permanent AF.

#### Assessment and Management of Risk

This trial is categorised by the Medicines and Healthcare products Regulatory Agency (MHRA) as:

##### Type A = No higher than the risk of standard medical care

The assessment and management of risk is detailed in the separate **RATE-AF** Risk Assessment document. An on-going evaluation of risk will continue throughout the recruitment period.

### 3.1 Hypothesis

#### Null Hypothesis for primary outcome:

No difference in patient-reported quality of life (measured using the physical functioning domain of the SF36 questionnaire) when comparing a strategy of digoxin versus beta-blocker therapy for initial rate control in patients with permanent AF.

#### Alternative Hypothesis:

Use of digoxin or beta-blocker therapy as initial rate control in patients with permanent AF is superior based on patient reported quality of life (measured using the physical functioning domain of the SF36 questionnaire).

### 3.2 Primary objective

- Patient-reported quality of life (QoL), with a predefined focus on physical well-being using the SF-36 physical component summary at six months.

### 3.3 Secondary objectives

- Generic and AF-specific patient-reported QoL using the SF-36 global and domain-specific scores, the AFEQT overall score and the EQ-5D-5L summary index and visual analogue scale at six and twelve months.
- Echocardiographic left-ventricular ejection fraction (LVEF) and diastolic function (E/e' and composite of diastolic indices) at twelve months.
- Functional assessment, including 6-minute walking distance achieved, change in European Heart Rhythm Association (EHRA) class and cognitive function at six and twelve months.
- Change in B-type natriuretic peptide (BNP) levels as a surrogate for total cardiac strain at six months.
- Change in heart rate from baseline and group comparison using 24-hour ambulatory ECG.

### 3.4 Feasibility objectives

- Successful methods for recruitment
- Key issues that affect retention of participants, such as convenience, compliance and cross-over (target of 85% study completion rate).
- Drug discontinuation rate and adverse reactions leading to drug discontinuation.
- Therapy-induced requirement for additional treatment (e.g. pacemaker implantation).
- Population-specific standard deviations and proportions to enable sample size calculation for a future trial.
- Assessment of cardiovascular outcomes including a composite of adverse clinical events (mortality, thromboembolic events, myocardial infarction and cardiovascular interventions).

### 3.5 Exploratory objectives

- Correlation of baseline measures, including QoL questionnaires and unblinded baseline investigations such as QoL, BNP, LVEF, E/e', EHRA, intracellular methods and heart rate.
- Impact of therapy on intracellular sodium and calcium concentration and cardiotonic steroid levels as biomarkers of cellular response at six and twelve months.



- Impact of combination therapy on outcomes, including comparison of bisoprolol/non-dihydropyridine calcium channel blocker (CCB) vs. bisoprolol/digoxin vs. digoxin/CCB vs. single therapies.
- Change in cognitive function at twelve months
- Qualitative research of patient-reported QoL using focus groups to explore patient acceptability, optimal delivery methods and responsiveness.
- Assessment of the validity and reproducibility of echocardiographic measures in patients with AF.
- Correlation of serum digoxin concentration with change in QoL and intracellular methods.
- Cost-consequence economic analysis from an NHS perspective.

## 4 Selection of Participants

Participants who potentially fulfil the inclusion criteria for this trial must have their eligibility confirmed by medically qualified personnel with access to and a full understanding of the potential participant's medical history. If eligibility has been assessed and documented by medically qualified personnel, then the process of obtaining informed consent may be delegated as appropriate and as documented on the **RATE-AF** Delegation and Signature Log.

### 4.1 Inclusion Criteria

- Adult patients aged 60 years or older
- Permanent AF, characterised (at time of randomisation) as a physician decision for rate-control with no plans for cardioversion, anti-arrhythmic medication, or ablation therapy
- Symptoms of breathlessness (New York Heart Association Class II or more)
- Able to provide written informed consent

### 4.2 Exclusion Criteria

- Established clinical indication for beta-blocker therapy, e.g. myocardial infarction in the last 6 months
- Known contraindications for therapy with beta-blockers or digoxin, e.g. a history of severe bronchospasm that would preclude use of beta-blockers, or known intolerance to these medications
- Baseline heart rate <60 bpm
- History of second or third-degree heart block
- Supraventricular arrhythmias associated with accessory conducting pathways (e.g. Wolff-Parkinson-White syndrome) or a history of ventricular tachycardia or fibrillation

- Planned pacemaker implantation (including cardiac resynchronisation therapy), pacemaker-dependent rhythm or history of atrioventricular node ablation
- Decompensated heart failure (evidenced by need for intravenous inotropes, vasodilators or diuretics) within 14 days prior to randomisation
- A current diagnosis of obstructive hypertrophic cardiomyopathy, myocarditis or constrictive pericarditis
- Received or on waiting list for heart transplantation
- Receiving renal replacement therapy
- Major surgery, including thoracic or cardiac surgery, within 3 months of randomisation
- Severe, concomitant non-cardiovascular disease (including malignancy) that is expected to reduce life expectancy

## 5 Informed Consent Process

It will be the responsibility of the Investigator to obtain written informed consent for each participant prior to performing any trial related procedure. If local practice allows, this responsibility may be delegated by the Principal Investigator, to a Research Nurse as captured on the Site Signature and Delegation Log. A Participant Information Leaflet (PIL) will be provided to facilitate this process. Investigators or delegate(s) will ensure that they adequately explain the aim, trial treatment, anticipated benefits and potential hazards of taking part in the trial to the participant. They will also stress that participation is voluntary and that the participant is free to refuse to take part and may withdraw from the trial at any time. The participant will be given adequate time to read the PIL and to discuss their participation with others outside of the site research team. The participant will be given the opportunity to ask questions.

If the participant expresses an interest in participating in the trial they will be asked to sign and date the latest version of the Informed Consent Form (ICF). The participant must give explicit consent for the regulatory authorities, members of the research team and representatives of the sponsor to be given direct access to the participant's medical records.

The Investigator or delegate(s) will then sign and date the form. A copy of the ICF will be given to the participant, a copy will be filed in the medical notes, and the original placed in the Investigator Site File (ISF). Once the participant is entered into the trial, the participant's unique trial identification number will be entered on the ICF maintained in the ISF. As part of the consent process, the participant will be asked to give explicit consent to their trial-related information being sent to the Trials Office at the University of Birmingham.

This trial will include **optional consent** to allow linkage to patient data available in NHS routine clinical datasets, including primary care data (e.g. Clinical Practice Research Datalink; CPRD, The Health Improvement Network; THIN, QResearch), secondary care data (Hospital Episode Statistics; HES) and mortality data from the Office of National Statistics (ONS) through The Health and Social Care Information Centre and other central UK NHS bodies. The consent will

1  
2  
3 also allow access to other new central UK NHS databases that will appear in the future. This will  
4 allow us to double check the main outcomes against routine data sources, and extend the follow-  
5 up of patients in the trial and collect long-term outcome and health resource usage data without  
6 needing further contact with the trial participants. This is important as it will link a trial of  
7 treatments that may become a clinical standard of care to long-term outcomes that are routinely  
8 collected in clinical data but which may be collected during the follow-up period of the trial.  
9  
10

11  
12 Details of the informed consent discussions will be recorded in the participant's medical notes.  
13 This will include date of discussion, the name of the trial, summary of discussion, version number  
14 of the PIL given to participant and version number of ICF signed and date consent received.  
15 Where consent is obtained on the same day that the trial related assessments are due to start, a  
16 note will be made in the medical notes as to what time the consent was obtained and what time  
17 the procedures started.  
18  
19  
20

21  
22 At each visit the participant's willingness to continue in the trial will be ascertained and  
23 documented in the medical notes. Throughout the trial the participant will have the opportunity to  
24 ask questions about the trial. Any new information that may be relevant to the participant's  
25 continued participation will be provided. Where new information becomes available which may  
26 affect the participants' decision to continue, participants will be given time to consider and if  
27 happy to continue will be re-consented. Re-consent will be documented in the medical notes.  
28 The participant's right to withdraw from the trial will remain.  
29  
30  
31

32  
33 Electronic copies of the PIL and ICF will be available from the Trials Office and will be presented  
34 on the headed paper of the local institution. Details of all participants approached about the trial  
35 will be recorded on the Participant Screening/Enrolment Log and with the participant's prior  
36 consent, their General Practitioner (GP) will also be informed that they are taking part in the trial.  
37  
38  
39

## 40 41 **6 Enrolment and Randomisation**

42  
43 A flowchart of the recruitment process is shown in the Trial Schema (**Figure 1**) together with the  
44 schedule of investigation. **Section 9** gives more detailed information of trial procedures and  
45 assessments.  
46  
47

48  
49 In the majority, potentially eligible participants will be identified by their Cardiologist, usually  
50 following referral from their General Practitioner (GP), and provided with an ethically-approved  
51 patient information leaflet (PIL). The patient will then be invited to attend a baseline visit at the  
52 NIHR Wellcome Trust Clinical Research Facility (WTCRF) at Queen Elizabeth Hospital,  
53 Birmingham. Potentially eligible participants may also be identified from inpatient referrals; these  
54 patients will be provided with a PIL and invited to attend a baseline visit following the same  
55 procedure.  
56  
57  
58

59  
60 GP Practices in the Birmingham area may be asked to refer patients that present with AF, but are  
not on medication, to the RATE-AF Research Team at University Hospitals Birmingham (UHB).  
These patients will be given a one-page, ethics committee-approved trial summary and asked to

1  
2  
3 sign a contact details form to confirm that they are happy to be contacted by a member of the  
4 Research Team to arrange an appointment.  
5  
6

7 Prior to patients undertaking any trial-related procedures, informed consent will be obtained.  
8

9  
10 Details of all patients approached about the trial should be recorded on the **RATE-AF** Screening  
11 & Enrolment Log. This Log should be maintained within the Investigator Site File.  
12  
13

## 14 **6.1 Randomisation Procedures**

15  
16 After all eligibility criteria have been confirmed and informed consent has been received, the  
17 participants can be randomised into the **RATE-AF** trial.  
18  
19

20  
21 Participants will be randomised in a 1:1 ratio to either **Digoxin 62.5 – 250 µg od or Bisoprolol**  
22 **1.25 – 15 mg od**. The time between randomisation and commencement of trial therapy should  
23 be minimised (ideally <24 hours). Randomisation will be provided by a computer generated  
24 programme at the Birmingham Clinical Trials Unit (BCTU), using a minimisation algorithm to  
25 ensure balance between the arms with regard to important clinical variables, stratifying for  
26 baseline EHRA (class 1/2a and 2b/3/4) and gender.  
27  
28  
29

### 30 **Telephone and Online Randomisation**

31  
32 Participants can be randomised into the trial via a secure 24 hour internet based randomisation  
33 service (<https://www.trials.bham.ac.uk/RATEAF>) or by a telephone call to the BCTU (telephone  
34 number **0800 953 0274**). Telephone randomisations are available Monday-Friday, 09:00-17:00.  
35 For the secure internet randomisation, each site and each randomiser will be provided with a  
36 unique log-in username and password in order to access the online system. Online  
37 randomisation is available 24 hours a day, 7 days a week, apart from short periods of scheduled  
38 maintenance and occasional network problems.  
39  
40  
41  
42

43 Randomisation Forms will be provided to investigators and should be completed and used to  
44 collate the necessary information prior to randomisation. Once all eligibility criteria have been  
45 provided and confirmed, a Trial Number and treatment allocation be given and relevant parties  
46 notified, including the participant's GP.  
47  
48  
49

### 50 **Back-up Randomisation**

51  
52 If the internet based randomisation service is unavailable for an extended period of time, a back-  
53 up paper randomisation will also be available at the BCTU. The randomisation list will be  
54 produced using a random length block design. In this instance, investigators should ring the  
55 BCTU randomisation service (telephone number **0800 953 0274**).  
56  
57  
58  
59  
60

## 7 Trial Treatment

### 7.1 Treatment

The Investigational Medicinal Products (IMPs) for this trial are Digoxin and Bisoprolol.

At randomisation, participants will be allocated to open-label treatment with either Digoxin 62.5 – 250 µg od or Bisoprolol 1.25 – 15 mg od.

#### Digoxin

Digoxin is a cardiac glycoside derived from the foxglove plant. The cardiac effects of digoxin therapy are summarised by:

- Positive inotropic effects: increased intracellular calcium due to direct inhibition of sodium-potassium adenosine triphosphatase (Na/K-ATPase)
- Negative chronotropic effects: decreased conduction velocity through the atrioventricular node, an increase in the effective refractory period and an increase in vagal activity leading to sinus node depression.

Clinically, digoxin is commonly prescribed in two conditions, heart failure and AF.

#### Bisoprolol

Bisoprolol fumarate is a highly beta-1 selective adrenoreceptor blocker first approved by the U.S. Food and Drug Administration in 1992. The cardiac effects of bisoprolol therapy are summarised by:

- Negative chronotropic effects: a reduction in resting and exercise heart rate due to prevention of norepinephrine and epinephrine from binding to the beta-receptor in cardiac conduction tissue.
- Negative (mild) inotropic effects: an initial fall in resting and exercise cardiac output with little observed change in stroke volume and only a small increase in right atrial pressure or pulmonary capillary wedge pressure.

Clinically, bisoprolol is commonly prescribed in a range of cardiology conditions, including post-myocardial infarction, heart failure and in patients with atrial tachyarrhythmia, including AF.

### 7.2 Treatment Supply and Storage

Due to the participant population and the fact that the trial closely aligns with standard care, trial medication may be dispensed from routine standard stock by both the pharmacy at the research site and community pharmacies local to the participant. Both treatments are used as per normal clinical practice therefore there is no additional requirement, above that of local policy, to monitor temperature during storage.

## Digoxin

Digoxin is available as an oral tablet in doses of 62.5, 125 and 250 µg or as an elixir (50 µg/mL). It is packaged in 28 or 500 tablet packs under the generic title digoxin and trade label Lanoxin.<sup>69</sup> Digoxin should be stored according to local policy.

## Bisoprolol

Bisoprolol is available as an oral tablet in doses of 1.25, 2.5, 3.75, 5.0, 7.5 and 10 mg. It is packaged as 28 tablets under the generic title bisoprolol fumarate and trade labels Cardicor and Emcor.<sup>69</sup> Bisoprolol should be stored according to local policy.

## 7.3 Dosing Schedule

### Digoxin

An advice sheet for the investigator is presented in **Appendix A**.

Trial maintenance doses will initially be 62.5 or 125 µg orally (at the clinician's discretion, taking into account age and renal function), with planned up-titration to 125/250 µg. The maximum trial dose will be 250 µg daily.

A single loading dose of four tablets (250 or 500 µg according to target maintenance dose) will be prescribed in digoxin-naïve participants. The clinician is permitted to omit the loading dose or prescribe a second, where necessary.

Unblinded serum digoxin concentrations will be assessed at visits 2 and 3, with results reported back to the relevant clinician(s). This process will assist in monitoring compliance, adjusting dosage in cases of low serum levels and avoiding toxicity.

### Bisoprolol

An advice sheet for the investigator is presented in **Appendix B**.

Trial starting doses will be 1.25 or 2.5 or 5 mg (at the clinician's discretion), with planned up-titration to 10 mg in increments of 1.25 or 2.5 mg. The maximum trial dose will be 15 mg daily. No loading dose is required.

Plasma concentrations have not shown to be associated with toxicity and are not part of standard clinical practice.

## 7.4 Drug Interactions and Contraindications

### Digoxin

Following oral administration of digoxin, approximately 60–85% of the dose is usually absorbed, mainly from the small intestine. The onset of action is 0.5-2 hours and maximal effects occur in

1  
2  
3 2-6 hours. Digoxin has a large volume of distribution and approximately 20-30% of digoxin in  
4 blood is bound to plasma proteins. Metabolism is minimal but variable, with the majority of drug  
5 excreted unchanged in the urine by glomerular filtration and tubular secretion. With normal renal  
6 function, the elimination half-life is 34-44 hours which is prolonged in patients with renal failure by  
7 two to threefold. Dose adjustment is unnecessary in patients with hepatic impairment.  
8 Therapeutic plasma concentrations of digoxin have been described as 0.5-2.0 ng/mL.<sup>70</sup> In  
9 digoxin-naïve patients with normal renal function, approximately seven days are required to reach  
10 steady-state therapeutic concentrations if a loading dose is omitted. As such, the majority of  
11 clinicians prescribe one or two loading doses, totalling 500 to 1000 µg over 24 hours.  
12  
13  
14  
15

16 Caution is recommended in patients with electrolyte disturbance (due to increased risk of toxicity)  
17 and reduced doses are recommended in patients with renal impairment. There are no concerns  
18 in pregnancy or with breast-feeding, although dose adjustment may be required.  
19  
20  
21

22 Contraindications for digoxin therapy include heart block, accessory pathway supraventricular  
23 tachycardia and a current diagnosis of obstructive hypertrophic cardiomyopathy, myocarditis or  
24 constrictive pericarditis.  
25  
26

27 Digoxin has been associated with a number of adverse effects, although data from randomised  
28 trials show little difference in comparison to placebo, apart from cases of toxicity (2% versus 0.9%  
29 respectively in the DIG trial of patients with HF)<sup>71</sup>. The most common side effects are  
30 gastrointestinal upset, dizziness, blurred vision, headache and rash. In toxic states (serum levels  
31 >2 ng/mL), digoxin is pro-arrhythmic and can aggravate heart failure, particularly with co-existent  
32 hypokalaemia. In cases of overdose, repeated early doses of activated charcoal may be given to  
33 reduce absorption and in severe toxicity, digoxin-specific antibody fragments are available as an  
34 intravenous infusion.  
35  
36  
37  
38  
39

40 In rigorous assessment, drug interactions with digoxin have proved inconsistent.<sup>72</sup> Serum digoxin  
41 concentrations are increased by amiodarone, dronedarone, propafenone and quinidine but  
42 increased bioavailability with CCB and certain antibiotics (such as erythromycin and tetracycline)  
43 only occur in selected patients. The risk of toxicity increases with drugs that cause electrolyte  
44 disturbances, such as thiazide and loop diuretics.  
45  
46  
47  
48

## 49 **Bisoprolol**

50 Following oral administration of digoxin, the absolute bioavailability is approximately 80%, first  
51 pass metabolism of 20% and 30% protein binding. Peak plasma concentrations occur within 2-4  
52 hours, the elimination half-life is 9-12 hours and steady state is attained within 5 days.  
53 Elimination occurs equally by renal and non-renal pathways with about 50% of the dose  
54 remaining unchanged in the urine.  
55  
56  
57

58 Caution is recommended in patients with first-degree heart block, portal hypertension, diabetes, a  
59 history of obstructive airways disease, myasthenia gravis, a history of hypersensitivity and  
60 psoriasis, although many cardiologists use beta-blockers frequently in these groups with  
appropriate supervision. In pregnancy, beta-blockers may cause intra-uterine growth restriction,

1  
2  
3 neonatal hypoglycaemia, and bradycardia (although as above, these agents are frequently used  
4 in pregnancy). There is a theoretical risk of toxicity in breast feeding, although the amount  
5 present in milk is likely too small to affect infants. Abrupt withdrawal should be avoided,  
6 especially in cases of ischaemic heart disease. Up-titration should be more cautious in patients  
7 with renal or hepatic impairment.  
8  
9

10  
11 Contraindications for bisoprolol therapy include cardiogenic shock, overt cardiac failure, second  
12 or third degree heart block, marked sinus bradycardia and severe peripheral arterial disease.  
13

14  
15 Bisoprolol has been associated with a wide variety of adverse effects although data from RCTs  
16 suggest similar discontinuation rates compare to placebo.<sup>5, 73</sup> The most common adverse  
17 symptoms are lethargy, headache, peripheral oedema, upper respiratory tract symptoms,  
18 gastrointestinal upset and dizziness. In cases of overdose, bradycardia, hypotension, congestive  
19 heart failure, bronchospasm and hypoglycaemia may be expected, with treatment directed to  
20 supportive methods and atropine, fluids, glucagon or diuretics as required.  
21  
22  
23

24  
25 Pharmacokinetic interactions with beta-blockers have not shown to be clinically significant. Drugs  
26 that reduce absorption include aluminium salts and cholestyramine, whilst metabolism can be  
27 increased by barbiturates and rifampicin and decreased with cimetidine, erythromycin,  
28 fluvoxamine, and hydralazine.  
29  
30

### 31 **7.5 Accountability Procedures and Labelling**

32  
33  
34 Through the risk-adapted approach, a full risk assessment of the **RATE-AF** trial has been  
35 conducted including the drug accountability requirements. The IMPs will be used within their  
36 authorisations, prescribed on an NHS prescription and dispensed by pharmacy from standard  
37 stock. The risk assessment has determined that a normal dispensing label is appropriate and an  
38 additional clinical trial label is not necessary (as covered by Regulation 46 (2) of SI 2004/1031).  
39 Drug accountability will be according to standard practice for NHS prescriptions. Details of how  
40 compliance will be assessed can be found in **Section 7.7**.  
41  
42  
43

### 44 **7.6 Treatment Modification**

45  
46  
47  
48 Patients that withdraw from medication for any reason will do so under strict clinical supervision.  
49

50  
51 The trial is designed to assess the impact of **initial** impact of rate control therapy; it is expected  
52 that treatments will modify during the trial period (in particular, the addition of therapy to attain  
53 heart rate targets). Patients will not be withdrawn from the trial if they commence therapy from  
54 the other arm of the trial due to any absolute or relative clinical indications (for example, patients  
55 in the digoxin arm starting beta-blockers due to incident myocardial infarction, or heart failure with  
56 reduced LVEF).  
57  
58  
59  
60



## 7.7 Assessment of Compliance

We will ask participants about compliance with their trial medication at each follow-up visit and this will be documented in the CRFs. It may also be clinically evident from the heart rate check, performed as part of all visits, whether or not the patient has been compliant with their trial medication.

In addition, patients that are randomised to the digoxin arm will have a serum digoxin sample taken as part of Visit 2 (month 6) and Visit 3 (month 12) follow-ups. The results will indicate whether the patient has been compliant with their trial medication.

## 8 Trial Procedures and Schedule of Assessments

### 8.1 Baseline Visit

The baseline visit will occur as soon as possible after screening and will involve the following procedures (see **Section 9** for procedure details):

- Verify inclusion/exclusion criteria.
- Obtain written informed consent from the potential participant.
- Randomise the patient via telephone or the secure web-based system as outlined in **Section 6**
- Administer QoL and functional capacity questionnaires.
- Review recent blood results (within 6 months of Baseline Visit)
  - Assessing renal function to aid in dose assignment and serum potassium level as part of standard clinical care.
- Document the use of oral anticoagulation and arrange appropriate prescription for patients not on therapy according to clinical guidelines. If the participant is already receiving vitamin-K antagonists (VKA), recent INR results will be documented.
- Record results of physical examinations.
- Collect blood samples for baseline blood tests and biomarker analysis.
- Complete case report form (CRF)
- Perform a 12-lead electrocardiogram.
- Supervise a 6-minute walk test, recording distance walked and peak heart rate.
- Arrange the baseline echocardiogram; images will be delivered to the echocardiographic core laboratory for blinded reporting.
- Discuss the randomised allocation with the participant including schedule for drug therapy and up-titration.

Participants will be followed up by telephone call two weeks after the Baseline Visit to ensure they have commenced trial medication.

## 8.2 Up-Titration Visits

For the majority of participants, two up-titration visits will be planned to supervise the appropriate use of medications as per the up-titration schedule (see **Appendices A and B**). Additional up-titration visits, as required, are acceptable in order to attain a heart rate at rest of  $\leq 100$ bpm.

Up-titration visits will involve the following procedures:

- Record adverse events as reported by the participant or observed by the investigator.
- Review of medications and plan for trial drug up-titration
- Assessment of compliance
- Symptom-directed clinical examination
- Vital signs, including heart rate and blood pressure
- Administer QoL and functional capacity questionnaires (last up-titration visit only).
- Organise a 24-hour ambulatory ECG once up-titration completed (results to be forwarded to the clinician).

## 8.3 Visit 2, Month 6

Visit 2 will occur at an interval of six months ( $\pm$  four weeks) after the Baseline Visit and involve the following procedures:

- Administer QoL and functional capacity questionnaires.
- Record adverse events as reported by the participant or observed by the investigator.
- Confirm current rate control therapy (including dosage) and check concomitant medications.
- Assessment of compliance.
- Collect blood samples for biomarker analysis.
- Collect blood sample for serum digoxin concentration, potassium and creatinine as part of standard clinical care.
- Record time in therapeutic range for patients on anticoagulation with vitamin-K antagonists and compliance in patients receiving non-VKA oral anticoagulants.
- Obtain a twelve lead ECG.
- Record the results of physical examinations and vital signs.
- Supervise a 6-minute walk test, recording distance walked and peak heart rate.
- Complete other CRF requirements.
- If an echocardiogram has been performed for clinical reasons since the previous visit, images will be retrieved and sent to the core echocardiographic laboratory.

- Confirm appointment date for Visit 3.

#### 8.4 Visit 3, Month 12 (Final Trial Assessment)

Visit 3 will occur at an interval of 12 months ( $\pm$  four weeks) after the Baseline Visit and involve the following procedures:

- Administer QoL and functional capacity questionnaires.
- Record adverse events as reported by the participant or observed by the investigator.
- Confirm current rate control therapy (including dosage) and check concomitant medications.
- Assessment of compliance.
- Transthoracic echocardiography (as per **Section 9.6**), with images delivered to the echocardiographic core laboratory for blinded reporting.
- Collect blood sample for serum digoxin concentration, potassium and creatinine as part of standard clinical care.
- Record time in therapeutic range for patients on anticoagulation with vitamin-K antagonists and compliance in patients receiving non-VKA oral anticoagulants.
- Obtain a twelve lead ECG.
- Record the results of physical examinations and vital signs.
- Supervise a 6-minute walk test, recording distance walked and peak heart rate.
- Complete other CRF requirements.
- If an echocardiogram has been performed for clinical reasons since the previous visit, images will be retrieved and sent to the core echocardiographic laboratory.
- Complete the end of trial standardised letter to the GP and clinician explaining that the participant has reached the end of the trial protocol and is no longer bound by their allocated medication strategy. Advise that all participants are invited for continued follow up and long term clinical outcome assessment.
- Provide final instructions to participant (e.g. follow-up of ongoing adverse events).

#### 8.5 Investigator-blinded Endpoints

Investigator-blinded endpoints (PROMs, echocardiography and biomarkers) will be assessed by the core laboratory, identified only by the trial number. Ambulatory ECG and serum digoxin level will remain unblinded and results delivered to the responsible clinician.

#### 8.6 Long Term Follow-Up

In patients who have agreed to NHS data linkage, a follow-up CRF will be completed. The CRF will capture items that include, but are not limited to death, hospital admissions and

1  
2  
3 cardiovascular events. The planned interval for outcome assessment is 2 and 5 years post-  
4 enrolment.  
5  
6

## 7 **8.7 Withdrawal**

8  
9  
10 Participants may withdraw at any time during the main **RATE-AF** trial if they choose not to  
11 continue or if their clinical team feel that continued participation in the trial is inappropriate.  
12

13 An investigator may deem it necessary to withdraw a participant from the trial if:

- 14  
15 1) Any clinical adverse event, laboratory abnormality, or other medical condition or situation  
16 occurs such that continued participation in the trial would not be in the best interest of the  
17 participant.  
18
- 19  
20 2) The participant meets an exclusion criterion (either newly developed or not previously  
21 recognised) that precludes further trial participation.  
22

23 Full details of the reason(s) for withdrawal should be recorded on the Case Report Forms (CRFs)  
24 if healthcare professional-initiated, otherwise a simple statement reflecting patient preference will  
25 suffice.  
26

27 Clear distinction will be made between withdrawals from trial treatments whilst allowing further  
28 follow-up, and any participants who refuse any follow-up. If a participant explicitly withdraws  
29 consent to any further data recording, then this decision will be respected. All communications  
30 surrounding the withdrawal will be noted in the participant's records and no further data will be  
31 collected for the participant.  
32  
33

34  
35 In the case of missing echocardiographic outcome data due to withdrawal (but with consent for  
36 ongoing follow-up) or death, results of recent clinical echocardiography will be retrieved. The  
37 participant's permission to obtain such data will be obtained and documented during the consent  
38 process. As with all trial echocardiograms, the scan will be reported by the core  
39 echocardiographic laboratory. With respect to patient-reported outcomes, QoL questionnaires  
40 will be mailed to participants who withdraw from trial treatment but consent to ongoing follow up.  
41 Those patients where adverse symptoms were related to withdrawal will be invited to a focus  
42 group for further discussion.  
43  
44  
45  
46  
47

## 48 **8.8 Trial Duration**

49  
50  
51 Patients will be on trial medication for 12 months and will be followed-up, during this period  
52 according to the protocol. At the end of the 12 months, the participants may, as determined by  
53 their clinician, continue on medication but it will not be considered part of the trial intervention.  
54 The trial will cease when the 12-month follow-up has been completed for the last participant  
55 recruited.  
56  
57  
58  
59  
60

Table 1: Schedule of Assessments

| Procedures                          |                  | Baseline Visit | Up-titration Visits<br>(Day 14 to 60) | Visit 2, Month 6<br>(± 4 weeks) | Visit 3, Month 12<br>(± 4 weeks) |
|-------------------------------------|------------------|----------------|---------------------------------------|---------------------------------|----------------------------------|
| Assessment of eligibility criteria  |                  | X              |                                       |                                 |                                  |
| Informed consent taken              |                  | X              |                                       |                                 |                                  |
| Review of medical history           |                  | X              |                                       |                                 |                                  |
| Review of medications               |                  | X              | X                                     | X                               | X                                |
| Physical exam                       | Complete         | X              |                                       |                                 |                                  |
|                                     | Symptom-directed |                | X                                     | X                               | X                                |
|                                     | Vital signs      | X              | X                                     | X                               | X                                |
| Quality of life assessment          |                  | X              | (X)                                   | X                               | X                                |
| Functional and cognitive assessment |                  | X              |                                       | X                               | X                                |
| Transthoracic echocardiogram        |                  | X              |                                       |                                 | X                                |
| 12-lead electrocardiogram           |                  | X              |                                       | X                               | X                                |
| 6-minute walk test                  |                  | X              |                                       | X                               | X                                |
| 24-hour ambulatory ECG              |                  |                | X                                     | (X)                             |                                  |
| Clinical labs                       | Chemistry        | X              |                                       | X                               | X                                |
|                                     | Haematology      | X              |                                       | X                               | X                                |
|                                     | Serum digoxin    |                |                                       | (X)                             | (X)                              |
| Trial labs                          | BNP              | X              |                                       | X                               |                                  |
|                                     | Stored sample    | X              |                                       | X                               |                                  |
| Assessment of compliance            |                  |                | X                                     | X                               | X                                |
| Assessment of adverse events        |                  |                | X                                     | X                               | X                                |

Parentheses denote where a procedure is dependent on the stage of participants within the trial.

## 9 Trial Procedures

### 9.1 Procedures Defined as Standard Clinical Care

The following assessments are considered part of the standard clinical care of AF patients receiving heart rate control therapy and will occur at all trial visits:

- Blood tests for haemoglobin, serum creatinine, potassium and serum digoxin concentration; these will be obtained by the research nurse and submitted to the site-specific hospital laboratory as per local guidelines and SOPs, ensuring that all specimens are accurately labelled and handled appropriately. In the case of results requiring urgent action, local policies will be followed which may include the participant visiting their GP, local hospital or investigator. In all cases, appropriate trial documentation will be completed.
- A 12-lead ECG; these will be completed by appropriately trained local staff.

### 9.2 Medical History

Medical history will be obtained by interview and from medical records (physical and electronic) at the Baseline Visit comprising:

- Cardiovascular history, including prior ischaemic coronary disease, interventions and surgery, history of hypertension, heart failure or hyperlipidaemia, stroke or transient ischaemic attack, pulmonary embolus/deep vein thrombosis and peripheral vascular disease.
- AF history, including year of diagnosis, previous cardioversions, previous ablation therapy and anti-arrhythmic drug history.
- Pacemaker history, including date and reason for implantation, type of device (single-chamber, dual-chamber, biventricular, implanted defibrillator) and dependency.
- Non-cardiac history, including diabetes mellitus, airways disease (asthma/COPD), renal impairment, bleeding history and other major co-morbidities.
- Social and demographic history, including smoking status (current/ex/never), race (Caucasian/Indian subcontinent/Asian/African/other) and physical activity using the International Physical Activity Questionnaire (short form).

### 9.3 Medication History

Medications history will be assessed according to the categories below and include current dosage. Except for anticoagulation, antiarrhythmic and rate control therapies, only current medications will be included.

- Anticoagulation therapy (vitamin-K antagonists and novel agents), including past use, INR results and time in therapeutic range.
- Antiarrhythmic therapy, including past use.

- Rate control therapy (beta-blockers, digoxin, CCB), including past use.
- Antiplatelet therapy.
- Angiotensin-converting enzyme inhibitors or angiotensin receptor blockers.
- Aldosterone antagonists.
- Diuretics (loop, thiazide, potassium-sparing, others).
- Nitrates.
- Other anti-hypertensive/anti-anginal therapy.
- Statins.
- Other lipid-lowering medication.
- Diabetic medication and insulin.
- Asthma/COPD medication (including inhalers).
- Non-steroidal anti-inflammatory agents.

## 9.4 Physical Examination

Physical and vital signs will be assessed at all up-titration and trial visits. In most cases, a targeted physical examination will be performed, comprising of cardiovascular elements as summarised below:

- Heart rate (manual palpation at radial artery and apex).
- Heart sounds.
- Lung auscultation.
- Assessment of jugular venous pressure and/or peripheral oedema.
- Other focused examinations according to symptoms and complaints.
- Blood pressure (two measurements at the right brachial in a seated position preferred, using a validated oscillometric device).
- Height (Baseline Visit only), weight (all listed visits) and waist circumference (Baseline Visit; defined as the narrowest point between ribs and hips when viewed from the front after exhaling to the nearest centimetre).

## 9.5 Patient Reported Outcomes

### 9.5.1 Choice of Outcomes and Qualitative Research

A systematic review (according to and in collaboration with the COnsensus-based Standards for the selection of health Measurement Instruments, COSMIN<sup>74</sup>) is underway to evaluate PROMs in AF, with a focus on psychometric properties including internal consistency, reliability, and measurement error. Additional assessment and practical evaluation of PROMs will follow published guidance<sup>75, 76</sup>, complementing qualitative research using patient focus groups, surveys

1  
2  
3 and directed interviews guided by the PROMs and qualitative research centres at the University  
4 of Birmingham.<sup>77</sup>  
5  
6

7 Instruments for assessment will be selected on the basis of overall validity, preferably in this  
8 patient population but including other groups where data are limited. Patient focus groups will  
9 allow exploration of patient perspectives on appropriate instruments that adequately reflect the  
10 experience of living with AF.<sup>78</sup> They will also allow comparison of QoL questionnaires that  
11 adequately summarise patient-prioritised components of their health and well-being. Additional  
12 focus groups and individual interviews will occur at interim and final follow-up during the trial.  
13 These aim to understand the patient experience of trial participation and processes, including the  
14 ease of completion of QoL questionnaires, relevance, reasons for non-completion and other  
15 feasibility issues that emerge during the trial e.g. non-compliance and recruitment, with reference  
16 to core outcome sets for this population.<sup>79</sup> A patient and public involvement (PPI) panel will  
17 contribute to all stages in the focus group process.<sup>80</sup>  
18  
19  
20  
21  
22

23 This protocol was developed in accordance with the Standard Protocol Items for Randomized  
24 Trials [SPIRIT] statement<sup>81</sup>, and the latest PROM-specific guidance from the International Society  
25 for Quality of Life Research (ISOQOL) Best Practice taskforce.<sup>77, 82, 83</sup>  
26  
27  
28  
29

### 30 **9.5.2 Data Collection for PROMs**

31 PROMs will be assessed at all main visits (Baseline, 2 and 3) and at the participants final up-  
32 titration visit (if applicable). The QoL tools used will be EQ-5D-5L, SF-36 and AFEQT. To avoid  
33 introducing co-intervention bias, all QoL data will be kept confidential and will not be used to  
34 inform clinical care.<sup>84</sup> Patients will be advised of this in the patient information sheet. PROMs will  
35 be collected at the start of each visit, before other trial procedures. In cases where the visit  
36 coincides with a clinician review, questionnaires should be completed in advance. The feasibility  
37 of using an online data collection tool will be explored, administered by trained research nurses  
38 and according to good-practice guidelines.<sup>85</sup> We will use this trial to perform an initial small-group  
39 assessment of electronic PROMs-equivalence to inform a future clinical event trial.  
40  
41  
42  
43  
44

45 Qualitative research will be performed using a focus group of 10 volunteer patients enrolled at the  
46 start of the trial (5 in each randomised group). The focus group will meet after up-titration and  
47 then at 6 and 12 months. Detailed methods will be established before the first meeting, in  
48 collaboration with the University of Birmingham Qualitative Research Group.  
49  
50  
51

52 All staff will receive training in QoL collection, with specific guidance on reducing introduced bias,  
53 minimising missing data and coaching participants to use the QoL software. Levels of missing  
54 PROMs data will be monitored. The site personnel responsible for collection of patient reported  
55 outcomes will be the Research Nurse under the supervision of the Principal Investigator.  
56  
57  
58  
59  
60



### 9.5.3 Outcome Appraisal

Each QoL tool will be scored according to their published requirements ([www.euroqol.org](http://www.euroqol.org); [www.sf-36.org](http://www.sf-36.org); [www.afect.org](http://www.afect.org)), using total and sub-category scores where appropriate.

To avoid dilution of effect over time, the primary analysis will be at six months (adjusting for baseline QoL and stratification variables). We have predefined a focus on physical well-being, which we hypothesize are where the greatest treatment effects will be observed, but will explore all aspects of QoL. Exploratory analysis of medication effects over the 12-month period will also be analysed and remain clinically important, as little data currently exists on the longer-term profile of QoL in AF.

Qualitative research outcomes will focus on the clinical responsiveness of the QoL instruments. The findings of the COSMIN systematic report will determine these outcomes and their relevant appraisal.

The RATE-AF trial will allow us to gain an initial understanding and framework of the patient experience of AF. We aim to begin the process of determining appropriate and responsive PROMs for AF patients and the optimum methods for delivery into a subsequent large-scale clinical trial.

## 9.6 Transthoracic Echocardiography

Echocardiography will be performed at Visits 1 and 3 and focus on systolic left-ventricular (LV) function, diastolic function and left-atrial assessment. Images will be obtained by an accredited echocardiographer. All trial echocardiograms will be labelled with the Trial Number and pseudoanonymised patient data, with specific instruction that the echocardiographer will remain blinded to the treatment assignment. All images will be archived to the core echocardiographic laboratory, with a copy retained in the site file.

### 9.6.1 Reproducibility and Validity of Measurements

Inter-observer and intra-observer variability in measurement will be assessed by comparing results of the stated methods discussed below across the cardiac cycle. To evaluate the minimum number of repeat measurements required that maintains clinical utility, reproducibility of single measurements will be compared to averages of 3/5/10 beats. This will also include the reliability of using an 'index beat' with a cycle length equivalent to a heart rate of 70-80 beats per minute, or with similar preceding and pre-preceding RR intervals.

### 9.6.2 Systolic LV Function

Systolic LV function will be determined by the following methods:

- Two-dimensional biplane Simpson's method utilising the simultaneous multi-planar approach to obtain LVEF in a single heartbeat (four and two-chamber views). In each

view, LV end-diastolic and end-systolic volumes (LVEDV, LVESV) are computed, with LVEF calculated as  $(LVEDV - LVESV) / LVEDV$ . Two-dimensional echocardiography has excellent spatial resolution but is limited by potential foreshortening of the ventricular apex and drop-out of the endocardial border.

- Standard Simpson's biplane method with four and two-chamber volumes obtained from separate heartbeats. This is the conventional method in current clinical use but is limited by varying RR intervals in AF.
- Fractional shortening on M-mode along the minor-axis of the left-ventricle (parasternal long-axis), calculated by the formula:  $(LV \text{ internal dimension in diastole} - LV \text{ internal dimension in systole}) / LV \text{ internal dimension in diastole}$ . M-mode measurements are reproducible and easy to perform with excellent temporal resolution, but are limited in cases of regional wall motion abnormalities and in patients where the true minor-axis is difficult to visualise.
- Both automated endocardial tracking and speckle-tracking analysis will be utilised (where available) by the echocardiographic core laboratory. Multiple planes will be obtained (four-chamber, two-chamber and short-axis mid-ventricle views). These methods have the advantage of reducing operator time and are angle-independent, but rely on good ultrasound windowing. Global longitudinal systolic strain using 2D speckle-tracking has recently been proposed as an important marker for adverse cardiovascular outcomes in AF.<sup>86</sup>
- Three-dimensional full-volume analyses of LV function, with single-beat analysis where feasible. This method has the advantage of not relying on geometric assumptions and allows the acquisition of full volume data within a single heartbeat. It correlates well with gold standard methods such as cardiac magnetic resonance imaging, but relies on adequate ultrasound windowing.
- Peak S-wave on tissue Doppler imaging (TDI) of the mitral valve annular sub-endocardium. This method has good correlation with LVEF across a wide range of function and is obtainable in patients with poor acoustic windows, but is limited in cases of regional wall motion abnormality.

Where poor quality acoustic windows limit accurate assessment of LV function, use of an intravenous contrast agent is recommended in participants without known allergy.

### 9.6.3 Diastolic LV Function

Diastolic LV function will be determined using the following methods (in all cases repeated over 3-5 cardiac cycles):

- Mitral inflow pulse-wave Doppler peak E velocity and deceleration time (DT).
- Mitral annular TDI to calculate septal E', lateral E' and the individual and averaged E/E' ratios.
- LV outflow tract pulse-wave Doppler to calculate isovolumic relaxation time (IVRT).

- Pulmonary vein pulse-wave Doppler to calculate peak systolic (where present) and diastolic velocities, ratio of peak velocities and DT of diastolic PV flow.
- Colour M-mode Doppler assessment of mitral flow propagation velocity (Vp) and ratio of E/Vp.

Overall diastolic function will be categorised according to the British Society of Echocardiography guidelines into normal function or mild/moderate/severe dysfunction based on a combination of the above variables. Individual parameters will also be categorised using cut-points identified from published studies.<sup>87</sup>

#### 9.6.4 Left Atrial Size and Function

Left atrial (LA) size will be measured in the anteroposterior (parasternal long-axis), transverse and longitudinal dimensions (apical 4-chamber). LA volumes will be calculated using the biplane area-length method:  $(0.85 \times 4\text{-chamber LA area} \times 2\text{-chamber LA area}) / \text{LA length}$ . The length is measured from the middle of the plane of the mitral annulus to the superior aspect of the LA (shortest of 4- and 2-chamber measurements). LA volumes will be indexed for body surface area.

Where suitable datasets are obtained, 3D LA volumetric analysis and assessment of LA function and strain will also be performed.

#### 9.6.5 Additional Echocardiography Parameters

The following parameters will be obtained in all participants:

- Tricuspid annular plane systolic excursion (TAPSE) for estimation of right ventricular function using pulse-wave Doppler.
- Where applicable, mitral regurgitation dP/dt.

### 9.7 Laboratory Evaluations

The use of biomarkers that can affect treatment decisions in AF is at an early stage of development.<sup>88</sup> The RATE-AF trial will allow us to collect and store blood samples on patients at baseline and follow-up, providing a unique biobank of AF patients receiving rate-control. In collaboration with the Human Biomaterials Resource Centre (HBRC) at the University of Birmingham, we will also isolate DNA for future work on predictors of response, including known polymorphisms of rate-responsiveness.<sup>89</sup>

Laboratories at each clinical site will process the standard laboratory investigations required as part of standard clinical care (see **Section 9.1**). Trial laboratory evaluations will be performed at the core laboratory and processed according to the guidelines in **Sections 9.7.1, 9.7.2 and 9.7.3**.

### 9.7.1 Laboratory Assays

NT-pro B-type natriuretic peptide will be analysed using a Sandwich immunoassay using monoclonal ruthenium labelled antibody and Roche Cobas 8000 e602. The total coefficient of variation for repeatability with this assay is <2% with an estimated volume of 250 microlitres required for each test and measurement range of 5-35000 pg/mL (0.6-4130 pmol/L).

### 9.7.2 Cellular Response to Rate Control

The effect of baseline and follow-up serum on intracellular sodium/calcium, force of contraction and activation of ERK1/2-dependent cascades will be examined in human induced pluripotent stem cell-derived cardiomyocytes, using well-established integrated fluorescence/contractility photometry and western blotting techniques.<sup>90, 91</sup> DigiFAB<sup>92</sup>, will be used to determine whether changes are dependent on endogenous cardiotoxic steroids, which can modulate intracellular ion concentration in cardiomyocytes<sup>93, 94</sup>, and potentially contribute to treatment discontinuation (or the development of toxicity).<sup>95</sup> The concentration of serum cardiotoxic steroids will be determined using liquid chromatography–tandem mass spectrometry. Individual change in cardiotoxic steroids and intracellular sodium/calcium will be correlated with the change in heart rate, LVEF, B-type natriuretic peptide and quality of life. In addition, we will identify patterns in patients withdrawing from treatment or experiencing adverse reactions.

### 9.7.3 Stored Blood Samples

Blood samples will be stored at HBRC for future biomarker and genetic analysis, with participants providing explicit consent for this process. Any future use of these samples will be undertaken with ethical approval.

### 9.7.4 Specimen Preparation, Handling, Storage and Shipment

Specimens will be handled according to local standard operating procedures consisting of the time requirements for processing, required temperatures, aliquots of specimens, where they will be stored, how they will be labelled, the process for remnant samples/disposal and appropriate instructions for transportation.

## 9.8 Economic Evaluation

The RATE-AF trial will allow determination of the most appropriate data collection methods and ease of acquiring resource use and cost data for a subsequent outcomes trial. Specifically, how data is obtained from secondary care records, patient-reported resource use and the feasibility of obtaining primary care records. A preliminary economic evaluation from an NHS perspective will be performed to estimate costs over the 12-month period. The patient-level cost-analysis will determine all AF-related costs, with respect to trial interventions and secondary-care resource use (including adverse events) in the two arms of the trial. We will collect both cost and outcome data and present them in a cost-consequence analysis. Costing for this trial suggests that simplifying medication alone could result in a saving of £5900 over each 12-month period.

1  
2  
3 Considering the high and increasing prevalence of AF, this could result in a substantial NHS cost  
4 savings, particularly if adverse reactions are also reduced. The aim of this objective within the  
5 trial is to prepare the groundwork for a future cost-per-quality adjusted life year (QALY) analysis  
6 of rate-control in AF.  
7

8  
9  
10 Costs of care will be derived from patient level resource-use data, focusing on secondary care  
11 costs, and including adverse effects, such as pacemaker implantation. Other major drivers of  
12 cost are hospitalisation (including visits to Accident & Emergency), unplanned outpatient visits  
13 and outpatient tests such as echocardiography or ambulatory ECG. The cost analysis will also  
14 consider therapy costs, both trial drug and additional treatments. Unit costs will be obtained from  
15 standard sources including NHS Reference Costs, Unit Costs of Health and Social Care<sup>96</sup> and  
16 health care providers. Total per-patient health care costs will initially be calculated thus allowing  
17 the estimation of mean costs per trial arm over 12 months follow-up. Responses to the EQ-5D-  
18 5L questionnaire at baseline, visit 2 (6 months) and visit 3 (12 months) will be used to plan a  
19 future QALY analysis.  
20  
21  
22

23  
24  
25 Key feasibility elements are:

- 26 • Determining the best methods for obtaining hospitalisation data, including where  
27 participants have been hospitalised outside of research site
- 28 • Whether robust primary care costs can be estimated and the method(s) for acquiring this  
29 type of data
- 30 • How key cost drivers can be incorporated into data collection for any future trial  
31  
32  
33  
34  
35  
36  
37  
38  
39  
40  
41  
42  
43  
44  
45  
46  
47  
48  
49  
50  
51  
52  
53  
54  
55  
56  
57  
58  
59  
60

## 10 Pharmacovigilance

Definitions of different types of AE are listed in **Table 2**. The Investigator should assess the seriousness and causality (relatedness) of AEs experienced by the participant (this should be documented in the source data). For further information please refer to **Section 10.1**.

**Table 2: Standard AE Definitions**

| Term                                                                                                      | Definition                                                                                                                                                                                                                                                                                                                                                                                                              |
|-----------------------------------------------------------------------------------------------------------|-------------------------------------------------------------------------------------------------------------------------------------------------------------------------------------------------------------------------------------------------------------------------------------------------------------------------------------------------------------------------------------------------------------------------|
| <b>Adverse Event (AE)</b>                                                                                 | Any untoward medical occurrence in a patient or clinical trial participant administered a medicinal product and which does not necessarily have a causal relationship with this treatment                                                                                                                                                                                                                               |
| <b>Adverse Reaction (AR)</b>                                                                              | Any untoward and unintended response in a participant to an investigational medicinal product which is related to any dose administered to that participant                                                                                                                                                                                                                                                             |
| <b>Serious adverse event (SAE), serious adverse reaction (SAR) or unexpected serious adverse reaction</b> | Any adverse event, adverse reaction or unexpected adverse reaction, respectively, that: <ul style="list-style-type: none"> <li>• results in death;</li> <li>• is life-threatening;</li> <li>• requires hospitalisation or prolongation of existing hospitalisation;</li> <li>• results in persistent or significant disability or incapacity; or</li> <li>• consists of a congenital anomaly or birth defect</li> </ul> |
| <b>Unexpected Adverse Reaction</b>                                                                        | An adverse reaction the nature and severity of which is not consistent with the information about the medicinal product in question set out: <p>(a) in the case of a product with a marketing authorisation, in the summary of product characteristics for that product;</p> <p>(b) in the case of any other investigational medicinal product, in the investigator's brochure relating to the trial in question.</p>   |
| <b>SUSAR</b>                                                                                              | Suspected Unexpected Serious Adverse Reaction                                                                                                                                                                                                                                                                                                                                                                           |

### 10.1 Recording and Assessment of Adverse Events

All adverse events will be reportable to the **RATE-AF** Trial Office up to 30 days post last IMP administration. Any SUSAR related to the IMP should to be reported irrespective of how long after IMP administration the reaction has occurred.

Adverse events will be recorded in the medical records and CRFs. Most AE/ARs that occur in this trial, whether they are serious or not, will be 'expected' treatment-related toxicities due to the drugs used in this trial.

Refer to **Table 3** for definition of expectedness.

**Table 3: Expectedness**

| Category          | Definition                                                                                                                                                                                                         |
|-------------------|--------------------------------------------------------------------------------------------------------------------------------------------------------------------------------------------------------------------|
| <b>Expected</b>   | An adverse event that is classed in nature as serious and which is consistent with the information about the IMP listed in the Investigator Brochure (or SmPC if Licensed IMP) or clearly defined in this protocol |
| <b>Unexpected</b> | An adverse event that is classed in nature as serious and which is not consistent with the information about the IMP listed in the Investigator Brochure (or SmPC if Licensed IMP)                                 |

Adverse events will be recorded with clinical symptoms and accompanied with a simple, brief description of the event, including dates as appropriate.

The assessment of relationship of adverse events to the administration of IMP is a clinical decision based on all available information at the time. The following categories as outlined in **Table 4** will be used to define the causality of the adverse event.

**Table 4: Categorisation of Causality**

| Category           | Definition                                                                                                                                                                                                                                                                                           |
|--------------------|------------------------------------------------------------------------------------------------------------------------------------------------------------------------------------------------------------------------------------------------------------------------------------------------------|
| <b>Definitely</b>  | There is clear evidence to suggest a causal relationship, and other possible contributing factors can be ruled out                                                                                                                                                                                   |
| <b>Probably</b>    | There is evidence to suggest a causal relationship, and the influence of other factors is unlikely                                                                                                                                                                                                   |
| <b>Possibly</b>    | There is some evidence to suggest a causal relationship (e.g. the event occurred within a reasonable time after administration of the trial medication). However, the influence of other factors may have contributed to the event (e.g. the patient's clinical condition, other concomitant events) |
| <b>Unlikely</b>    | There is little evidence to suggest there is a causal relationship (e.g. the event did not occur within a reasonable time after administration of the trial medication). There is another reasonable explanation for the event (e.g. the patient's clinical condition, other concomitant treatments) |
| <b>Not related</b> | There is no evidence of any causal relationship                                                                                                                                                                                                                                                      |

The relevant SmPC for Digoxin and Bisoprolol (which will be dependent on which generic is being used according to local practice at each site) should be filed in the site file by the local research team.

1  
2  
3 The **RATE-AF** Trial protocol and the reference safety information will be used to assess disease  
4 related and/or expected events related to the trial treatment.  
5  
6

## 7 **10.2 Non-Serious Adverse Events/ Adverse Reactions**

8  
9 *Refer to Table 2 for definitions*  
10  
11

12  
13 Common adverse reactions (see Section 7.4) will be recorded on the relevant CRF and sent to  
14 the **RATE-AF** Trial Office.  
15  
16

## 17 **10.3 Serious Adverse Events**

18  
19 *Refer to Table 2 for definitions*  
20  
21

22  
23 All Serious Adverse Events (SAEs), that are not excluded from expedited reporting will be  
24 recorded in the hospital notes and should be reported to the **RATE-AF** Trial Office on a SAE  
25 Form. The completed form should be **faxed to the RATE-AF Trial Office on 0121 415 9135 or**  
26 **0121 415 9136**, as soon as possible and ideally within one working day of becoming aware of the  
27 event. The site Investigator should be able to respond to any related queries raised by the  
28 **RATE-AF** Trial Office as soon as possible.  
29  
30  
31

### 32 **10.3.1 Expected SAEs NOT to be Reported on a SAE Form**

33  
34 Expected SAEs are those listed in the current SmPC for the trial IMPs and can be excluded from  
35 the expedited reporting outlined in **Section 10.1**, for example if they are expected to occur on a  
36 regular basis and offer no further new information to the safety profile. These events should  
37 continue to be recorded in the source data and relevant CRFs.  
38  
39  
40

41  
42 In addition, events **NOT** considered to be SAEs are hospitalisations for:

- 43  
44 • Routine treatment or monitoring of the studied indication, not associated with any  
45 deterioration in condition
- 46  
47 • Treatment, which was elective or pre-planned, for a pre-existing condition that is unrelated  
48 to the indication under trial, and has not worsened  
49  
50

51 **Note:** Death from any cause should be reported on an SAE Form and returned to the **RATE-AF**  
52 Trial Office.  
53  
54

## 55 **10.4 SUSARs**

56  
57 *Refer to Table 2 for definitions*  
58  
59

60 SAEs classed by as both suspected to be related to the trial IMP and unexpected are categorised  
as SUSARs, and are always subject to expedited reporting. An SAE Form should be completed,



1  
2  
3 and faxed to the RATE-AF Trial Office within 24 hours of the research staff at site becoming  
4 aware of the event. The local investigator will provide the causality assessment.  
5  
6

7 The Chief Investigator (or nominated individual) will undertake urgent review of all such SAEs  
8 and may request further information immediately from the clinical team at site. The Chief  
9 Investigator will not overrule the causality or seriousness assessment given by the local  
10 investigator but may add additional comment on these. The Chief Investigator will provide the  
11 determination of expectedness according to the reference safety information.  
12  
13

14  
15 SUSARs will be notified to the MHRA and REC by the RATE-AF Trial Office. SUSARs that are  
16 fatal or life-threatening will be notified to the MHRA and REC within 7 days after the RATE-AF  
17 Trial Office has been notified. Other SUSARs will be reported to the REC and MHRA within 15  
18 days after the Trial Office has been notified.  
19  
20

## 21 22 **10.5 Development Safety Update Reports** 23

24  
25 The RATE-AF Trial Office will provide the MHRA with Development Safety Update Reports  
26 (DSURs). The reports will be submitted within 60 days of the Developmental International Birth  
27 Date (DIBD) of the trial each year until the trial is declared ended.  
28  
29

## 30 31 **10.6 Annual Progress Reports** 32

33 An annual progress report will be submitted to the REC within 30 days of the anniversary date on  
34 which the favourable opinion was given, and annually until the trial is declared ended.  
35  
36

## 37 38 **10.7 Pregnancy** 39

40 Due to the age of participants that will be randomised into the RATE-AF Trial ( $\geq 60$  years), it is  
41 highly improbable that female participants will be pregnant at the time of randomisation, or  
42 become pregnant during the trial. Any pregnancies will be followed up for outcome; any outcome  
43 meeting the definition of an SAE will be reported to the RATE-AF Trial Office on the relevant  
44 CRF.  
45  
46  
47

## 48 49 **10.8 Reporting Urgent Safety Measures** 50

51 If any urgent safety measures are taken the Principal Investigator/BCTU/Sponsor shall  
52 immediately and in any event no later than 3 days from the date the measures are taken, give  
53 written notice to the MHRA and the REC of the measures taken and the circumstances giving rise  
54 to those measures.  
55  
56  
57  
58  
59  
60

## 11 Quality Control and Quality Assurance

### 11.1 Site Set-Up and Initiation

All participating Principal Investigators will be asked to sign the necessary agreements and supply a current CV to the Trials Office. All members of the site research team will also be required to sign a site signature and delegation log. Prior to commencing recruitment all sites will undergo a process of initiation and will have completed GCP training. Key members of the site research team will be required to attend either a meeting or a teleconference covering aspects of the trial design, protocol procedures, Adverse Event reporting, collection and reporting of data and record keeping. Sites will be provided with an Investigator Site File containing essential documentation, instructions, and other documentation required for the conduct of the trial. The Trials Office must be informed immediately of any change in the site research team.

### 11.2 Central Monitoring

Monitoring of this trial will be to ensure compliance with Good Clinical Practice. A risk proportionate approach to the initiation, management and monitoring of the trial will be adopted (as per the MRC/DH/MHRA Joint Project: Risk-adapted Approaches to the Management of Clinical Trials of Investigational Medicinal Products) and outlined in the trial-specific risk assessment.

The Trials Office will be in regular contact with the site research team to check on progress and address any queries that they may have. The Trials Office will check incoming CRFs for compliance with the protocol, data consistency, missing data and timing. Sites will be asked for missing data or clarification of inconsistencies or discrepancies. Sites will be requested to send in copies of signed Informed Consent Forms and other documentation for in-house review for all participants providing explicit consent.

Additional on-site monitoring visits may be triggered, for example by poor CRF return, poor data quality, low SAE reporting rates, excessive number of participant withdrawals or deviations. This will be detailed in the monitoring plan. If a monitoring visit is required the Trials Office will contact the site to arrange a date for the proposed visit and will provide the site with written confirmation. Investigators will allow the **RATE-AF** trial staff access to source documents as requested.

### 11.3 Audit and Inspection

The Principal Investigator will permit trial-related monitoring, quality checks, audits, ethical reviews, and regulatory inspection(s) at their site, providing direct access to source data/documents. The Principal Investigator will comply with these visits and any required follow up. Sites are also requested to notify the Trials Office of any MHRA inspections.

## 11.4 Notification of Serious Breaches

In accordance with Regulation 29A of the Medicines for Human Use (Clinical Trials) Regulations 2004 and its amendments the Sponsor of the trial is responsible for notifying the licensing authority in writing of any serious breach of the conditions and principles of GCP in connection with that trial or the protocol relating to that trial, within 7 days of becoming aware of that breach.

For the purposes of this regulation, a “serious breach” is a breach which is likely to effect to a significant degree the safety or physical or mental integrity of the participants of the trial; or the scientific value of the trial. Sites are therefore requested to notify the Trials office of any suspected trial-related serious breach of GCP and/or the trial protocol. Where the Trials Office is investigating whether or not a serious breach has occurred sites are also requested to cooperate with the Trials Office in providing sufficient information to report the breach to the MHRA where required and in undertaking any corrective and/or preventive action. Sites may be suspended from further recruitment in the event of serious and persistent non-compliance with the protocol and/or GCP, and/or poor recruitment. Any major problems identified during monitoring may be reported to Trial Management Group and Trial Oversight Committee, the REC and the relevant regulatory bodies. This includes reporting serious breaches of GCP and/or the trial protocol to the REC and MHRA. A copy is sent to the University of Birmingham Clinical Research Compliance Team at the time of reporting to the REC and/or relevant regulatory bodies.

## 11.5 Data Handling and Analysis

Paper CRFs must be completed, signed/ dated and either entered directly online or returned to the **RATE-AF** Trial Office by the PI or an authorised member of the site research team (as delegated on the **RATE-AF** Trial Signature and Delegation Log) within the timeframe listed in **Table 5**. Copies of all completed CRFs should be filed in the site file. Entries on paper CRFs should be made in ballpoint pen, in black ink, and must be legible. Any errors should be crossed out with a single stroke, the correction inserted and the change initialled and dated. If it is not obvious why a change has been made, an explanation should be written next to the change.

CRFs can be entered online at <http://www.bctu.bham.ac.uk/RATEAF>. Authorised staff at sites will require an individual secure login username and password to access this online data entry system.

Data reported on each CRF should be consistent with the source data or the discrepancies should be explained. If information is not known, this must be clearly indicated on the CRF. All missing and ambiguous data will be queried. All sections are to be completed.

CRF versions may be updated by the **RATE-AF** Trial Office, as appropriate, throughout the duration of the trial. Whilst this will not constitute a protocol amendment, new versions of the CRFs must be implemented by participating sites immediately on receipt.

It will be the responsibility of the Principal Investigator to ensure the accuracy of all data entered in the CRFs. The **RATE-AF** Trial Signature & Delegation Log will identify all those personnel with responsibilities for data collection.

Access to data, including the final trial dataset, will be limited to members of the Research Team.

The investigator(s)/institution(s) will permit trial-related monitoring, audits, REC review, and regulatory inspection(s), providing direct access to source data/documents. Trial participants are informed of this during the informed consent discussion and will consent to provide access to their medical notes.

**Table 5: Data Collection Forms**

| Form Name                   | Schedule for submission                                              |
|-----------------------------|----------------------------------------------------------------------|
| Randomisation Form          | Collected at randomisation                                           |
| Baseline and Follow-Up CRFs | As soon as possible after each follow-up assessment time point       |
| Serious Adverse Event Form  | Faxed within 24hrs of research staff at site becoming aware of event |

### 11.6 End of Trial

The end of trial will be 30 days after the last data capture. This will allow sufficient time for the completion of protocol procedures, data collection and data input. The Trials Office will notify the MHRA and REC that the trial has ended within 90 days of the end of trial. Where the trial has terminated early, the Trials Office will inform the MHRA and REC within 15 days of the end of trial. The Trials Office will provide them with a summary of the clinical trial report within 12 months of the end of trial.

A copy of the end of trial notification as well as the summary report is also sent to the University of Birmingham Research Governance Team at the time of sending these are sent to the MHRA and REC.

### 11.7 Archiving

Archiving will be authorised by the BCTU on behalf of the Sponsor following submission of the end of trial report.

Principal Investigators are responsible for the secure archiving of essential trial documents (for their site) as per their NHS Trust policy. All essential documents will be archived for a minimum of 25 years after completion of trial.

Destruction of essential documents will require authorisation from the BCTU on behalf of the Sponsor.

## 12 Statistical Considerations

### 12.1 Outcome measures

#### 12.1.1 Primary Outcome

Patient-reported quality of life (QoL) - SF-36 physical component summary score at six months

#### 12.1.2 Secondary Outcomes

##### Patient-reported QoL:

- SF-36 global and domain-specific scores at 6 and 12 months
- EQ-5D-5L summary index and visual analogue scale at six and twelve months
- AFEQT overall score at six and twelve months

##### Cardiac function:

- Echocardiographic LVEF at 12 months
- Diastolic function (E/e' and composite of diastolic indices) at 12 months
- Functional assessment:
- Six-minute walking distance at 6 and 12 months
- Change in European Heart Rhythm Association (EHRA) class at 6 and 12 months

##### Biomarkers:

- Change in B-type natriuretic peptide (BNP) levels at 6 months
- Change in heart rate using 24-hour ambulatory ECG

#### 12.1.3 Feasibility Outcomes

- Recruitment target of 3 patients per week across all participating centres.
- Compliance and reasons for non-compliance
- Number of withdrawals and losses to follow-up (with reasons)
- Drug discontinuation rate and adverse reactions requiring drug discontinuation.
- Number of patients needing therapy-induced requirement for additional treatment
- Population-specific standard deviations (SD) and proportions

- *SD of SF36 physical functioning score at 6 and 12 months*
- *SD of SF36 overall score at 6 and 12 months*
- *SD of AFEQT overall score at 6 and 12 months*
- *SD of LVEF and E/e' score at 6 and 12 months*
- *Unplanned hospitalisation admissions rates*
- Cardiovascular Events (particularly mortality, thromboembolic events, myocardial infarction and cardiovascular interventions)

The final analyses will follow a pre-specified analysis plan, drafted in conjunction with the Birmingham Clinical Trials Unit and submitted to the steering committee at the penultimate meeting. We intend to perform a primary intention-to-treat analysis, in addition to a per-protocol analysis.

Any additional (exploratory) analyses will be explicitly labelled as such in any subsequent manuscript.

## 12.2 Power Calculations

Randomising 144 patients we can assume an 85% power to detect an effect size of half a standard deviation in a continuous outcome measure of QoL (two-sided alpha of 0.05). A sample size of 160 patients would account for an estimated 10% loss to follow-up (including withdrawal and death prior to 12-month assessment). There is some evidence from existing research to support the notion that the treatment effect could be this large. The mean SF-36 role-physical score from the rate-control arm of the RACE study was 47, with a 17% improvement with rate-control over time.<sup>62</sup> In another study, CCB resulted in 22% improvement in a proprietary symptom-checklist, compared to a non-significant 8% change in those assigned to beta-blockers (SD 10-points in both groups). These values are also consistent with a 17% improvement in SF-36 scores in a third trial, PIAF.<sup>63</sup> Thus whilst it is possible that this trial may provide a clear indication of effect, it is accepted that the trial will be underpowered to detect smaller differences, reinforcing the requirement for a larger definitive trial which would also be powered to assess impact on clinical event rates.

## 12.3 Statistical analysis

A separate Statistical Analysis Plan for the RATE-AF trial provides a detailed description of the planned statistical analyses. A brief outline of these analyses is given below.

The primary comparison groups will be composed of those who are randomised to digoxin group and those randomised to the beta-blockers group. All analyses will be based on the intention to treat principle, with all patients analysed in the arms to which they were allocated irrespective of compliance with the randomised allocated treatment, and all patients will be included in the analyses. We will, as a sensitivity analysis, conduct per-protocol analyses, where appropriate.

1  
2  
3 For all analyses, a p-value <0.05 will be considered statistically significant.  
4  
5

### 6 **12.3.1 Primary outcome analysis**

7  
8 The primary outcome for this trial is the continuous SF36 physical functioning domain score at 6  
9 months. This outcome will be analysed using an ANCOVA model adjusting for treatment arm,  
10 baseline score and all minimisation variables. Results will be presented as difference in means  
11 and 95% confidence intervals.  
12  
13

### 14 **12.3.2 Feasibility and Secondary outcomes analysis**

15  
16 The feasibility and secondary outcomes for the trial comprise of a combination of both continuous  
17 and categorical (dichotomous) data items.  
18  
19

#### 20 **Categorical endpoints:**

21  
22 For outcomes which are categorical (dichotomous) in nature, the proportion of participants and  
23 percentages will be analysed between arms.  
24  
25

26  
27 Logistic/Log-binomial regression models will be fitted (where appropriate) to adjust for treatment  
28 arm, baseline scores and all minimisation variables.  
29  
30

31  
32 Results will be presented as odds ratios/relative risks and 95% confidence intervals.  
33  
34

#### 35 **Continuous endpoints:**

36  
37 Any outcomes that are continuous in nature will be analysed in the same way as the primary  
38 outcome.  
39  
40

### 41 **12.3.3 Missing data and sensitivity analyses**

42  
43 Primary analysis will concentrate on available data only, with no attempt made to impute missing  
44 data. Where appropriate, sensitivity analyses will be carried out to examine the possible impact  
45 of missing data on the results (full details will be discussed within the Statistical Analysis Plan).  
46  
47  
48  
49

### 50 **12.3.4 Interim analyses and Stopping rules**

51  
52 Analysis of the data with respect to efficacy and safety will be performed at 12 months and sent  
53 to Data Monitoring Committee (DMC); see **Section 16**. The DMC will outline and agree the  
54 stopping rules for the trial which will be documented in the DMC charter. It is likely that the  
55 Haybittle-Peto boundary will be used. This states that if an interim analysis shows a probability of  
56 less than 0.001 that the treatments are different, then the trial should be stopped early. This will  
57 be used alongside data on important secondary endpoints and all other relevant evidence. A  
58 DMC report and charter outlining the terms of reference (including information on stopping rules)  
59 will be agreed with the DMEC.  
60

## 12.4 Final analysis

The final analysis for the RATE-AF trial will occur once the last randomised participant completes their 12-month follow-up.

## 13 Ethics and Regulatory Requirements

The trial will be performed in accordance with the recommendations guiding physicians in biomedical research involving human participants, adopted by the 18<sup>th</sup> World Medical Association General Assembly, Helsinki, Finland, June 1964, amended at the 48<sup>th</sup> World Medical Association General Assembly, Somerset West, Republic of South Africa, October 1996 (website: <http://www.wma.net/en/30publications/10policies/b3/index.html>).

The trial will be conducted in accordance with the Research Governance Framework for Health and Social Care, the applicable UK Statutory Instruments, (which include the Medicines for Human Use Clinical Trials 2004 and subsequent amendments and the Data Protection Act 1998 and Human Tissue Act 2008, EU Clinical Trials Directive and amendment Regulations as appropriate) and Guidelines for Good Clinical Practice (GCP). This trial will be carried out under a Clinical Trial Authorisation in accordance with the Medicines for Human Use Clinical Trials regulations. The protocol will be submitted to and approved by the REC prior to circulation.

Before any participants are enrolled into the trial, the Principal Investigator at each site is required to obtain local R&D approval. Sites will not be permitted to enrol participants until written confirmation of R&D approval is received by the Principal Investigator.

It is the responsibility of the Principal Investigator to ensure that all subsequent amendments gain the necessary local approval. This does not affect the individual clinicians' responsibility to take immediate action if thought necessary to protect the health and interest of individual participants.

Within 90 days after the end of the trial, the Chief Investigator/Sponsor will ensure that the REC and the MHRA are notified that the trial has finished. If the trial is terminated prematurely, those reports will be made within 15 days after the end of the trial. The Chief Investigator will provide the Sponsor with a summary report of the clinical trial, which will then be submitted to the MHRA and REC within one year after the end of the trial.

## 14 Oversight Committees

### 14.1 Trial Management Group

The Trial Management Group (TMG) will comprise the CI, other lead investigators (clinical and non-clinical) and members of the BCTU. The TMG will be responsible for the day-to-day running and management of **RATE-AF**. The TMG will convene at regular intervals.



## 14.2 Trial Oversight Committee

A joint oversight committee comprising a Trial Steering Committee (TSC) and Data Monitoring Committee (DMC) will be engaged for this trial.

The role of the TSC is to provide the overall supervision of the trial. The TSC will monitor trial progress and conduct and advice on scientific credibility. The TSC will consider and act, as appropriate, upon the recommendations of the Data Monitoring Committee. Further details of the remit and role of the TSC are available in the TSC Charter.

An independent DMC will be established to oversee the safety of participants in the trial. The DMC will meet prior to the trial opening to enrolment, and then meet at least annually, or as per a timetable agreed by the DMC prior to trial commencement. Data analyses will be supplied in confidence to the DMC, which will be asked to give advice on whether the accumulated data from the trial, together with the results from other relevant research, justifies the continuing recruitment of further participants. The DMC will operate in accordance with the trial specific charter.

## 14.3 Protocol amendments

Where important protocol modifications are required as a result of oversight (for example, changes to eligibility criteria, outcomes or analyses), this information will be communicated to relevant parties, such as investigators, the REC, trial registries and regulators.

## 15 Finance

The RATE-AF Trial is funded through a Career Development Fellowship awarded to the Chief Investigator by the National Institute for Health Research (NIHR).

## 16 Confidentiality and Data Protection

Personal data recorded on all documents will be regarded as strictly confidential and will be handled and stored in accordance with the Data Protection Act 1998.

Participants will be identified using their unique trial identification number, date of birth and hospital number on the CRFs. and correspondence between the Trials Office and the participating site. Participants will give their explicit consent for the movement of their consent form, giving permission for the Trials Office to be sent a copy. This will be used to perform in-house monitoring of the consent process.

The Investigator must maintain documents not for submission to the Trials Office (e.g. Participant Identification Logs) in strict confidence. In the case of specific issues and/or queries from the

regulatory authorities, it will be necessary to have access to the complete trial records, provided that participant confidentiality is protected.

The Trials Office will maintain the confidentiality of all participants' data and will not disclose information by which participants may be identified to any third party other than those directly involved in the treatment of the participant and organisations for which the participant has given explicit consent for data transfer (e.g. competent authority, sponsor). Representatives of the RATE-AF Trials Office and sponsor may be required to have access to participant's notes for quality assurance purposes but participants should be reassured that their confidentiality will be respected at all times.

## 17 Insurance and Indemnity

The University of Birmingham has in place Clinical Trials indemnity coverage for this trial which provides cover to the University for harm which comes about through the University's, or its staff's, negligence in relation to the design or management of the trial and may alternatively, and at the University's discretion provide cover for non-negligent harm to participants.

With respect to the conduct of the trial at the Clinical Site and other clinical care of the patient, responsibility for the care of the patients remains with the NHS organisation responsible for the Clinical Site and is therefore indemnified through the NHS Litigation Authority.

The University of Birmingham is independent of any pharmaceutical company, and as such it is not covered by the Association of the British Pharmaceutical Industry (ABPI) guidelines for participant compensation.

## 18 Dissemination and Publication

Regular newsletters will keep collaborators informed of trial progress and regular meetings will be held to report the progress of the trial and to address any problems encountered in the conduct of the trial. The CI will coordinate dissemination of data from this trial. All publications and presentations, including abstracts, relating to the main trial will be authorised by the RATE-AF TMG. The results of the analysis will be published in the name of the RATE-AF Collaborative Group in a peer reviewed journal (provided that this does not conflict with the journal's policy).

Named authors must satisfy the International Committee of Medical Journal Editors (ICMJE) criteria for authorship (contribute to drafting of the article or revision for important intellectual content), provide timely approval of the final version to be published and supply detailed statements on any potential conflict of interest or financial relationship (<http://www.icmje.org/>). Members of the group who do not fulfil ICMJE criteria for authorship will be listed in the article appendix. Trial participants will be sent a lay summary of the final results of the trial, which will contain a reference to the full paper.

## 19 Statement of Compliance

The RATE-AF trial will be conducted in compliance with the approved protocol, EU GCP and the applicable regulatory requirements.

For peer review only

## 20 References

1. Camm AJ, Kirchhof P, Lip GY, Schotten U, Savelieva I, Ernst S, Van Gelder IC, Al-Attar N, Hindricks G, Prendergast B, Heidbuchel H, Alfieri O, Angelini A, Atar D, Colonna P, De Caterina R, De Sutter J, Goette A, Gorenek B, Heldal M, Hohloser SH, Kolh P, Le Heuzey JY, Ponikowski P, Rutten FH. Guidelines for the management of atrial fibrillation: the Task Force for the Management of Atrial Fibrillation of the European Society of Cardiology (ESC). *Eur Heart J*. 2010;31:2369-2429
2. Anderson JL, Halperin JL, Albert NM, Bozkurt B, Brindis RG, Curtis LH, DeMets D, Guyton RA, Hochman JS, Kovacs RJ, Ohman EM, Pressler SJ, Sellke FW, Shen W-K. Management of patients with atrial fibrillation (Compilation of 2006 ACCF/AHA/ESC and 2011 ACCF/AHA/HRS recommendations). *Circulation*. 2013;127:1916-1926
3. Camm AJ, Lip GY, De Caterina R, Savelieva I, Atar D, Hohnloser SH, Hindricks G, Kirchhof P, E. S. C. Committee for Practice Guidelines. 2012 focused update of the ESC Guidelines for the management of atrial fibrillation: an update of the 2010 ESC Guidelines for the management of atrial fibrillation. Developed with the special contribution of the European Heart Rhythm Association. *Eur Heart J*. 2012;33:2719-2747
4. National Institute for Health and Care Excellence. Atrial fibrillation: the management of atrial fibrillation. *NICE clinical guideline 180*. 2014; Accessed 15/09/2014; <http://www.nice.org.uk/guidance/cg180/>
5. Kotecha D, Holmes J, Krum H, Altman DG, Manzano L, Cleland JG, Lip GY, Coats AJ, Andersson B, Kirchhof P, von Lueder TG, Wedel H, Rosano G, Shibata MC, Rigby A, Flather MD, Beta-Blockers in Heart Failure Collaborative Group. Efficacy of beta blockers in patients with heart failure plus atrial fibrillation: an individual-patient data meta-analysis. *Lancet*. 2014;384:2235-2243
6. Ziff OJ, Lane DA, Samra M, Griffith M, Kirchhof P, Lip GY, Steeds RP, Townend J, Kotecha D. Safety and efficacy of digoxin: systematic review and meta-analysis of observational and controlled trial data. *BMJ*. 2015;351:h4451
7. Kotecha D, Banerjee A, Lip GY. Increased stroke risk in atrial fibrillation patients with heart failure: does ejection fraction matter? *Stroke*. 2015;46:608-609
8. Kotecha D, Kirchhof P. Rate and rhythm control have comparable effects on mortality and stroke in atrial fibrillation but better data are needed. *Evid Based Med*. 2014;19:222-223
9. Kotecha D, Piccini JP. Atrial fibrillation in heart failure: what should we do? *Eur Heart J*. 2015;36:3250-3257
10. Senoo K, Lip GY, Lane DA, Buller HR, Kotecha D. Residual risk of stroke and death in anticoagulated patients according to the type of atrial fibrillation: AMADEUS Trial. *Stroke*. 2015;46:2523-2528
11. Kotecha D, Chudasama R, Lane DA, Kirchhof P, Lip GY. Atrial fibrillation and heart failure due to reduced versus preserved ejection fraction: A systematic review and meta-analysis of death and adverse outcomes. *Int J Cardiol*. 2016;203:660-666
12. Arain M, Campbell MJ, Cooper CL, Lancaster GA. What is a pilot or feasibility study? A review of current practice and editorial policy. *BMC Med Res Methodol*. 2010;10:67
13. Thabane L, Ma J, Chu R, Cheng J, Ismaila A, Rios LP, Robson R, Thabane M, Giangregorio L, Goldsmith CH. A tutorial on pilot studies: the what, why and how. *BMC Med Res Methodol*. 2010;10:1
14. Heeringa J, van der Kuip DAM, Hofman A, Kors JA, van Herpen G, Stricker BHC, Stijnen T, Lip GYH, Witteman JCM. Prevalence, incidence and lifetime risk of atrial fibrillation: the Rotterdam study. *Eur Heart J*. 2006;27:949-953

15. Colilla S, Crow A, Petkun W, Singer DE, Simon T, Liu X. Estimates of Current and Future Incidence and Prevalence of Atrial Fibrillation in the U.S. Adult Population. *Am J Cardiol.* 2013;112:1142-1147
16. Kim MH, Johnston SS, Chu BC, Dalal MR, Schulman KL. Estimation of total incremental health care costs in patients with atrial fibrillation in the United States. *Circ Cardiovasc Qual Outcomes.* 2011;4:313-320
17. Benjamin EJ, Wolf PA, D'Agostino RB, Silbershatz H, Kannel WB, Levy D. Impact of Atrial Fibrillation on the Risk of Death: The Framingham Heart Study. *Circulation.* 1998;98:946-952
18. Stewart S, Hart CL, Hole DJ, McMurray JJV. A population-based study of the long-term risks associated with atrial fibrillation: 20-year follow-up of the Renfrew/Paisley study. *Am J Med.* 2002;113:359-364
19. Marijon E, Le Heuzey JY, Connolly S, Yang S, Pogue J, Brueckmann M, Eikelboom J, Themeles E, Ezekowitz M, Wallentin L, Yusuf S. Causes of death and influencing factors in patients with atrial fibrillation: a competing-risk analysis from the randomized evaluation of long-term anticoagulant therapy study. *Circulation.* 2013;128:2192-2201
20. Chen LY, Sotoodehnia N, Buzkova P, Lopez FL, Yee LM, Heckbert SR, Prineas R, Soliman EZ, Adabag S, Konety S, Folsom AR, Siscovick D, Alonso A. Atrial fibrillation and the risk of sudden cardiac death: the atherosclerosis risk in communities study and cardiovascular health study. *JAMA Intern Med.* 2013;173:29-35
21. Dorian P, Jung W, Newman D, Paquette M, Wood K, Ayers GM, Camm J, Akhtar M, Luderitz B. The impairment of health-related quality of life in patients with intermittent atrial fibrillation: implications for the assessment of investigational therapy. *J Am Coll Cardiol.* 2000;36:1303-1309
22. Thrall G, Lane D, Carroll D, Lip GYH. Quality of Life in Patients with Atrial Fibrillation: A Systematic Review. *Am J Med.* 2006;119:448.e441-419
23. Sears SF, Serber ER, Alvarez LG, Schwartzman DS, Hoyt RH, Ujhelyi MR. Understanding Atrial Symptom Reports: Objective versus Subjective Predictors. *Pacing Clin Electrophysiol.* 2005;28:801-807
24. Dries D, Exner D, Gersh B, Domanski M, Waclawiw M, Stevenson L. Atrial fibrillation is associated with an increased risk for mortality and heart failure progression in patients with asymptomatic and symptomatic left ventricular systolic dysfunction: a retrospective analysis of the SOLVD trials. *J Am Coll Cardiol.* 1998;32:695-703
25. Wang TJ, Larson MG, Levy D, Vasan RS, Leip EP, Wolf PA, D'Agostino RB, Murabito JM, Kannel WB, Benjamin EJ. Temporal Relations of Atrial Fibrillation and Congestive Heart Failure and Their Joint Influence on Mortality: The Framingham Heart Study. *Circulation.* 2003;107:2920-2925
26. The Atrial Fibrillation Follow-up Investigation of Rhythm Management (AFFIRM) Investigators. A Comparison of Rate Control and Rhythm Control in Patients with Atrial Fibrillation. *N Engl J Med.* 2002;347:1825-1833
27. Van Gelder IC, Hagens VE, Bosker HA, Kingma JH, Kamp O, Kingma T, Said SA, Darmanata JI, Timmermans AJM, Tijssen JGP, Crijns HJGM. A Comparison of Rate Control and Rhythm Control in Patients with Recurrent Persistent Atrial Fibrillation. *N Engl J Med.* 2002;347:1834-1840
28. Olshansky B, Rosenfeld LE, Warner AL, Solomon AJ, O'Neill G, Sharma A, Platia E, Feld GK, Akiyama T, Brodsky MA, Greene HL. The Atrial Fibrillation Follow-up Investigation of Rhythm Management (AFFIRM) study: approaches to control rate in atrial fibrillation. *J Am Coll Cardiol.* 2004;43:1201-1208
29. Hohnloser SH, Kuck KH, Lilienthal J. Rhythm or rate control in atrial fibrillation--Pharmacological Intervention in Atrial Fibrillation (PIAF): a randomised trial. *Lancet.* 2000;356:1789-1794

- 1
- 2
- 3 30. Carlsson J, Miketic S, Windeler J, Cuneo A, Haun S, Micus S, Walter S, Tebbe U, Investigators S. Randomized trial of rate-control versus rhythm-control in persistent atrial fibrillation: the Strategies of Treatment of Atrial Fibrillation (STAF) study. *J Am Coll Cardiol.* 2003;41:1690-1696
- 4
- 5
- 6 31. de Denus S, Sanoski CA, Carlsson J, Opolski G, Spinler SA. Rate vs rhythm control in patients with atrial fibrillation: a meta-analysis. *Arch Intern Med.* 2005;165:258-262
- 7
- 8
- 9 32. Chatterjee S, Sardar P, Lichstein E, Mukherjee D, Aikat S. Pharmacologic rate versus rhythm-control strategies in atrial fibrillation: an updated comprehensive review and meta-analysis. *PACE.* 2013;36:122-133
- 10
- 11
- 12
- 13 33. Shelton RJ, Clark AL, Goode K, Rigby AS, Houghton T, Kaye GC, Cleland JG. A randomised, controlled study of rate versus rhythm control in patients with chronic atrial fibrillation and heart failure: (CAFE-II Study). *Heart.* 2009;95:924-930
- 14
- 15
- 16
- 17 34. Roy D, Talajic M, Nattel S, Wyse DG, Dorian P, Lee KL, Bourassa MG, Arnold JMO, Buxton AE, Camm AJ, Connolly SJ, Dubuc M, Ducharme A, Guerra PG, Hohnloser SH, Lambert J, Le Heuzey J-Y, O'Hara G, Pedersen OD, Rouleau J-L, Singh BN, Stevenson LW, Stevenson WG, Thibault B, Waldo AL. Rhythm Control versus Rate Control for Atrial Fibrillation and Heart Failure. *N Engl J Med.* 2008;358:2667-2677
- 18
- 19
- 20
- 21
- 22
- 23 35. Kong MH, Shaw LK, O'Connor C, Califf RM, Blazing MA, Al-Khatib SM. Is rhythm-control superior to rate-control in patients with atrial fibrillation and diastolic heart failure? *Ann Noninvasive Electrocardiol.* 2010;15:209-217
- 24
- 25
- 26
- 27 36. Wazni O, Wilkoff B, Saliba W. Catheter Ablation for Atrial Fibrillation. *N Engl J Med.* 2011;365:2296-2304
- 28
- 29
- 30 37. Jones DG, Haldar SK, Hussain W, Sharma R, Francis DP, Rahman-Haley SL, McDonagh TA, Underwood SR, Markides V, Wong T. A randomized trial to assess catheter ablation versus rate control in the management of persistent atrial fibrillation in heart failure. *J Am Coll Cardiol.* 2013;61:1894-1903
- 31
- 32
- 33
- 34
- 35 38. Kirchhof P, Breithardt G, Camm AJ, Crijns HJ, Kuck KH, Vardas P, Wegscheider K. Improving outcomes in patients with atrial fibrillation: rationale and design of the Early treatment of Atrial fibrillation for Stroke prevention Trial. *Am Heart J.* 2013;166:442-448
- 36
- 37
- 38
- 39 39. Steg PG, Alam S, Chiang C-E, Gamra H, Goethals M, Inoue H, Krapf L, Lewalter T, Merioua I, Murin J, Naditch-Brûlé L, Ponikowski P, Rosenqvist M, Silva-Cardoso J, Zharinov O, Brette S, Neill JO. Symptoms, functional status and quality of life in patients with controlled and uncontrolled atrial fibrillation: data from the RealiseAF cross-sectional international registry. *Heart.* 2012;98:195-201
- 40
- 41
- 42
- 43
- 44 40. Nabauer M, Gerth A, Limbourg T, Schneider S, Oeff M, Kirchhof P, Goette A, Lewalter T, Ravens U, Meinertz T, Breithardt G, Steinbeck G. The Registry of the German Competence NETwork on Atrial Fibrillation: patient characteristics and initial management. *Europace.* 2009;11:423-434
- 45
- 46
- 47
- 48 41. Segal JB, McNamara RL, Miller MR, Kim N, Goodman SN, Powe NR, Robinson K, Yu D, Bass EB. The evidence regarding the drugs used for ventricular rate control. *J Fam Practice.* 2000;49:47-59
- 49
- 50
- 51 42. Farshi R, Kistner D, Sarma JSM, Longmate JA, Singh BN. Ventricular rate control in chronic atrial fibrillation during daily activity and programmed exercise: a crossover open-label study of five drug regimens. *J Am Coll Cardiol.* 1999;33:304-310
- 52
- 53
- 54
- 55 43. Koh KK, Kwon KS, Park HB, Baik SH, Park SJ, Lee KH, Kim EJ, Kim SH, Cho SK, Kim SS. Efficacy and safety of digoxin alone and in combination with low-dose diltiazem or betaxolol to control ventricular rate in chronic atrial fibrillation. *Am J Cardiol.* 1995;75:88-90
- 56
- 57
- 58
- 59 44. Nikolaidou T, Channer KS. Chronic atrial fibrillation: a systematic review of medical heart rate control management. *Postgrad Med J.* 2009;85:303-312
- 60

- 1
- 2
- 3 45. Ulimoen SR, Enger S, Carlson J, Platonov PG, Pripp AH, Abdelnoor M, Arnesen H, Gjesdal K, Tveit A. Comparison of four single-drug regimens on ventricular rate and arrhythmia-related symptoms in patients with permanent atrial fibrillation. *Am J Cardiol.* 2013;111:225-230
- 4
- 5
- 6 46. Ulimoen SR, Enger S, Pripp AH, Abdelnoor M, Arnesen H, Gjesdal K, Tveit A. Calcium channel blockers improve exercise capacity and reduce N-terminal Pro-B-type natriuretic peptide levels compared with beta-blockers in patients with permanent atrial fibrillation. *Eur Heart J.* 2014;35:517-524
- 7
- 8
- 9
- 10
- 11 47. Khand AU, Rankin AC, Martin W, Taylor J, Gemmell I, Cleland JG. Carvedilol alone or in combination with digoxin for the management of atrial fibrillation in patients with heart failure? *J Am Coll Cardiol.* 2003;42:1944-1951
- 12
- 13
- 14
- 15 48. Vamos M, Erath JW, Hohnloser SH. Digoxin-associated mortality: a systematic review and meta-analysis of the literature. *Eur Heart J.* 2015; In press: 10.1093/eurheartj/ehv143
- 16
- 17
- 18 49. Gheorghide M, Fonarow GC, van Veldhuisen DJ, Cleland JG, Butler J, Epstein AE, Patel K, Aban IB, Aronow WS, Anker SD, Ahmed A. Lack of evidence of increased mortality among patients with atrial fibrillation taking digoxin: findings from post hoc propensity-matched analysis of the AFFIRM trial. *Eur Heart J.* 2013;34:1489-1497
- 19
- 20
- 21
- 22
- 23 50. Friberg L, Hammar N, Rosenqvist M. Digoxin in atrial fibrillation: report from the Stockholm Cohort study of Atrial Fibrillation (SCAF). *Heart.* 2010;96:275-280
- 24
- 25
- 26 51. Flory JH, Ky B, Haynes K, S MB, Munson J, Rowan C, Strom BL, Hennessy S. Observational cohort study of the safety of digoxin use in women with heart failure. *BMJ Open.* 2012;2:e000888
- 27
- 28
- 29 52. Andrey JL, Romero S, Garcia-Egido A, Escobar MA, Corzo R, Garcia-Dominguez G, Lechuga V, Gomez F. Mortality and morbidity of heart failure treated with digoxin. A propensity-matched study. *Int J Clin Pract.* 2011;65:1250-1258
- 30
- 31
- 32
- 33 53. Lewis RV, Irvine N, McDevitt DG. Relationships between heart rate, exercise tolerance and cardiac output in atrial fibrillation: the effects of treatment with digoxin, verapamil and diltiazem. *Eur Heart J.* 1988;9:777-781
- 34
- 35
- 36
- 37 54. Tsuneda T, Yamashita T, Fukunami M, Kumagai K, Niwano S, Okumura K, Inoue H. Rate control and quality of life in patients with permanent atrial fibrillation: the Quality of Life and Atrial Fibrillation (QOLAF) Study. *Circ J.* 2006;70:965-970
- 38
- 39
- 40
- 41 55. Van Gelder IC, Groenveld HF, Crijns HJGM, Tuininga YS, Tijssen JGP, Alings AM, Hillege HL, Bergsma-Kadijk JA, Cornel JH, Kamp O, Tukkie R, Bosker HA, Van Veldhuisen DJ, Van den Berg MP. Lenient versus Strict Rate Control in Patients with Atrial Fibrillation. *N Engl J Med.* 2010;362:1363-1373
- 42
- 43
- 44
- 45
- 46 56. Groenveld HF, Crijns HJGM, Van den Berg MP, Van Sonderen E, Alings AM, Tijssen JGP, Hillege HL, Tuininga YS, Van Veldhuisen DJ, Ranchor AV, Van Gelder IC. The Effect of Rate Control on Quality of Life in Patients With Permanent Atrial Fibrillation: Data From the RACE II (Rate Control Efficacy in Permanent Atrial Fibrillation II) Study. *J Am Coll Cardiol.* 2011;58:1795-1803
- 47
- 48
- 49
- 50
- 51 57. Mulder BA, Van Veldhuisen DJ, Crijns HJGM, Tijssen JGP, Hillege HL, Alings M, Rienstra M, Groenveld HF, Van den Berg MP, Van Gelder IC. Lenient vs. strict rate control in patients with atrial fibrillation and heart failure: a post-hoc analysis of the RACE II study. *Eur J Heart Fail.* 2013;15:1311-1318
- 52
- 53
- 54
- 55
- 56 58. Groenveld HF, Tijssen JG, Crijns HJ, Van den Berg MP, Hillege HL, Alings M, Van Veldhuisen DJ, Van Gelder IC. Rate control efficacy in permanent atrial fibrillation: successful and failed strict rate control against a background of lenient rate control: data from RACE II (Rate Control Efficacy in Permanent Atrial Fibrillation). *J Am Coll Cardiol.* 2013;61:741-748
- 57
- 58
- 59
- 60 59. US Department of Health and Human Services Food and Drug Administration. Guidance for industry: patient-reported outcome measures: use in medical product development to support

- 1  
2 labeling claims.  
3 [www.fda.gov/downloads/Drugs/GuidanceComplianceRegulatoryInformation/Guidances/UCM19328](http://www.fda.gov/downloads/Drugs/GuidanceComplianceRegulatoryInformation/Guidances/UCM193282.pdf)  
4 [2.pdf](http://www.fda.gov/downloads/Drugs/GuidanceComplianceRegulatoryInformation/Guidances/UCM193282.pdf). 2009  
5  
6  
7 60. Rienstra M, Lubitz SA, Mahida S, Magnani JW, Fontes JD, Sinner MF, Van Gelder IC, Ellinor PT,  
8 Benjamin EJ. Symptoms and Functional Status of Patients With Atrial Fibrillation: State of the Art  
9 and Future Research Opportunities. *Circulation*. 2012;125:2933-2943  
10  
11 61. Pepine CJ. Effects of pharmacologic therapy on health-related quality of life in elderly patients with  
12 atrial fibrillation: a systematic review of randomized and nonrandomized trials. *Clin Med Insights*  
13 *Cardiol*. 2013;7:1-20  
14  
15 62. Hagens VE, Ranchor AV, Van Sonderen E, Bosker HA, Kamp O, Tijssen JGP, Kingma JH, Crijns  
16 HJGM, Van Gelder IC. Effect of rate or rhythm control on quality of life in persistent atrial fibrillation:  
17 Results from the Rate Control Versus Electrical Cardioversion (RACE) study. *J Am Coll Cardiol*.  
18 2004;43:241-247  
19  
20 63. Grönefeld GC, Lilienthal J, Kuck K-H, Hohnloser SH. Impact of rate versus rhythm control on  
21 quality of life in patients with persistent atrial fibrillation: Results from a prospective randomized  
22 study. *Eur Heart J*. 2003;24:1430-1436  
23  
24 64. Ware Jr JE, Gandek B. Overview of the SF-36 Health Survey and the International Quality of Life  
25 Assessment (IQOLA) Project. *J Clin Epidemiol*. 1998;51:903-912  
26  
27 65. Herdman M, Gudex C, Lloyd A, Janssen M, Kind P, Parkin D, Bonser G, Badia X. Development  
28 and preliminary testing of the new five-level version of EQ-5D (EQ-5D-5L). *Qual Life Res*.  
29 2011;20:1727-1736  
30  
31 66. Devlin NJ, Krabbe PF. The development of new research methods for the valuation of EQ-5D-5L.  
32 *Eur J Health Econ*. 2013;14 Suppl 1:S1-3  
33  
34 67. Spertus J, Dorian P, Bubien R, Lewis S, Godejohn D, Reynolds MR, Lakkireddy DR, Wimmer AP,  
35 Bhandari A, Burk C. Development and validation of the Atrial Fibrillation Effect on Quality-of-Life  
36 (AFEQT) Questionnaire in patients with atrial fibrillation. *Circ Arrhythm Electrophysiol*. 2011;4:15-  
37 25  
38  
39 68. Dorian P, Burk C, Mullin CM, Bubien R, Godejohn D, Reynolds MR, Lakkireddy DR, Wimmer AP,  
40 Bhandari A, Spertus J. Interpreting changes in quality of life in atrial fibrillation: How much change  
41 is meaningful? *Am Heart J*. 2013;166:381-387.e388  
42  
43 69. Joint Formulary Committee. *British National Formulary*. London: BMJ Group and Pharmaceutical  
44 Press; 2013.  
45  
46 70. American Hospital Formulary Service. *Drug Information*. Bethesda: American Society of Health-  
47 System Pharmacists; 2013.  
48  
49 71. The Digitalis Investigation Group. The effect of digoxin on mortality and morbidity in patients with  
50 heart failure. *N Engl J Med*. 1997;336:525-533  
51  
52 72. Magnani B, Malini PL. Cardiac glycosides. Drug interactions of clinical significance. *Drug Safety*.  
53 1995;12:97-109  
54  
55 73. Ko DT, Hebert PR, Coffey CS, Sedrakyan A, Curtis JP, Krumholz HM. Beta-blocker therapy and  
56 symptoms of depression, fatigue, and sexual dysfunction. *JAMA*. 2002;288:351-357  
57  
58 74. Terwee C, Mokkink L, Knol D, Ostelo RJG, Bouter L, Vet HW. Rating the methodological quality in  
59 systematic reviews of studies on measurement properties: a scoring system for the COSMIN  
60 checklist. *Qual Life Res*. 2012;21:651-657  
  
75. Streiner DL, Norman GR. *Health measurement scales : a practical guide to their development and  
use*. Oxford ; New York: Oxford University Press; 2008.



- 1  
2  
3 76. Staniszewska S, Haywood KL, Brett J, Tutton L. Patient and public involvement in patient-reported  
4 outcome measures: evolution not revolution. *Patient*. 2012;5:79-87
- 5  
6 77. Calvert M, Kyte D, Duffy H, Gheorghe A, Mercieca-Bebber R, Ives J, Draper H, Brundage M,  
7 Blazeby J, King M. Patient-reported outcome (PRO) assessment in clinical trials: a systematic  
8 review of guidance for trial protocol writers. *PLoS One*. 2014;9:e110216
- 9  
10 78. McCabe PJ, Schumacher K, Barnason SA. Living with atrial fibrillation: a qualitative study. *J*  
11 *Cardiovasc Nurs*. 2011;26:336-344
- 12  
13 79. Kirchhof P, Auricchio A, Bax J, Crijns H, Camm J, Diener H-C, Goette A, Hindricks G, Hohnloser S,  
14 Kappenberger L, Kuck K-H, Lip GYH, Olsson B, Meinertz T, Priori S, Ravens U, Steinbeck G,  
15 Svernhage E, Tijssen J, Vincent A, Breithardt G. Outcome parameters for trials in atrial fibrillation:  
16 Recommendations from a consensus conference organized by the German Atrial Fibrillation  
17 Competence NETwork (AFNET) and the European Heart Rhythm Association (EHRA). *Eur Heart*  
18 *J*. 2007;28:2803-2817
- 19  
20 80. Haywood K, Brett J, Salek S, Marlett N, Penman C, Shklarov S, Norris C, Santana MJ,  
21 Staniszewska S. Patient and public engagement in health-related quality of life and patient-  
22 reported outcomes research: what is important and why should we care? Findings from the first  
23 ISOQOL patient engagement symposium. *Qual Life Res*. 2014: Epub ahead of print; PMID  
24 25194573
- 25  
26 81. Chan AW, Tetzlaff JM, Gotzsche PC, Altman DG, Mann H, Berlin JA, Dickersin K, Hrobjartsson A,  
27 Schulz KF, Parulekar WR, Krleza-Jeric K, Laupacis A, Moher D. SPIRIT 2013 explanation and  
28 elaboration: guidance for protocols of clinical trials. *BMJ*. 2013;346:e7586
- 29  
30 82. Calvert M, Kyte D, von Hildebrand M, King M, Moher D. Putting patients at the heart of health-care  
31 research. *Lancet*. 2015;385:1073-1074
- 32  
33 83. Kyte D, Duffy H, Fletcher B, Gheorghe A, Mercieca-Bebber R, King M, Draper H, Ives J, Brundage  
34 M, Blazeby J, Calvert M. Systematic evaluation of the patient-reported outcome (PRO) content of  
35 clinical trial protocols. *PLoS One*. 2014;9:e110229
- 36  
37 84. Kyte D, Draper H, Calvert M. Patient-reported outcome alerts: ethical and logistical considerations  
38 in clinical trials. *JAMA*. 2013;310:1229-1230
- 39  
40 85. Zbrozek A, Hebert J, Gogates G, Thorell R, Dell C, Molsen E, Craig G, Grice K, Kern S, Hines S.  
41 Validation of electronic systems to collect patient-reported outcome (PRO) data-recommendations  
42 for clinical trial teams: report of the ISPOR ePRO systems validation good research practices task  
43 force. *Value Health*. 2013;16:480-489
- 44  
45 86. Su H-M, Lin T-H, Hsu P-C, Lee W-H, Chu C-Y, Lee C-S, Voon W-C, Lai W-T, Sheu S-H. Global left  
46 ventricular longitudinal systolic strain as a major predictor of cardiovascular events in patients with  
47 atrial fibrillation. *Heart*. 2013;99:1588-1596
- 48  
49 87. Al-Omari MA, Finstuen J, Appleton CP, Barnes ME, Tsang TSM. Echocardiographic assessment of  
50 left ventricular diastolic function and filling pressure in atrial fibrillation. *Am J Cardiol*.  
51 2008;101:1759-1765
- 52  
53 88. Hijazi Z, Oldgren J, Siegbahn A, Granger CB, Wallentin L. Biomarkers in atrial fibrillation: a clinical  
54 review. *Eur Heart J*. 2013;34:1475-1480
- 55  
56 89. Parvez B, Chopra N, Rowan S, Vaglio JC, Muhammad R, Roden DM, Darbar D. A common beta1-  
57 adrenergic receptor polymorphism predicts favorable response to rate-control therapy in atrial  
58 fibrillation. *J Am Coll Cardiol*. 2012;59:49-56
- 59  
60 90. Mahmmod YA, Shattock M, Cornelius F, Pavlovic D. Inhibition of K<sup>+</sup> transport through Na<sup>+</sup>, K<sup>+</sup>-  
ATPase by capsazepine: role of membrane span 10 of the alpha-subunit in the modulation of ion  
gating. *PLoS One*. 2014;9:e96909

- 1  
2  
3 91. Pavlovic D, Hall AR, Kennington EJ, Aughton K, Boguslavskiy A, Fuller W, Despa S, Bers DM, Shattock MJ. Nitric oxide regulates cardiac intracellular Na(+) and Ca(2)(+) by modulating Na/K ATPase via PKCepsilon and phospholemman-dependent mechanism. *J Mol Cell Cardiol.* 2013;61:164-171  
4  
5  
6  
7 92. Pullen MA, Brooks DP, Edwards RM. Characterization of the neutralizing activity of digoxin-specific Fab toward ouabain-like steroids. *J Pharmacol Exp Ther.* 2004;310:319-325  
8  
9  
10 93. Manunta P, Messaggio E, Casamassima N, Gatti G, Carpini SD, Zagato L, Hamlyn JM. Endogenous ouabain in renal Na(+) handling and related diseases. *Biochim Biophys Acta.* 2010;1802:1214-1218  
11  
12  
13  
14 94. Pavlovic D. The role of cardiotonic steroids in the pathogenesis of cardiomyopathy in chronic kidney disease. *Nephron Clin Pract.* 2014;128:11-21  
15  
16  
17 95. Song H, Karashima E, Hamlyn JM, Blaustein MP. Ouabain-digoxin antagonism in rat arteries and neurones. *J Physiol.* 2014;592:941-969  
18  
19  
20 96. Curtis L. Unit Costs of Health & Social Care 2012. *Personal Social Services Research Unit.* 2012:<http://www.pssru.ac.uk/archive/pdf/uc/uc2012/full-with-covers.pdf>  
21  
22  
23 97. Jerosch-Herold M. Quantification of myocardial perfusion by cardiovascular magnetic resonance. *Journal of Cardiovascular Magnetic Resonance.* 2010;12:57  
24  
25  
26  
27  
28  
29  
30  
31  
32  
33  
34  
35  
36  
37  
38  
39  
40  
41  
42  
43  
44  
45  
46  
47  
48  
49  
50  
51  
52  
53  
54  
55  
56  
57  
58  
59  
60

APPENDIX A – Dosing Schedule (Digoxin)

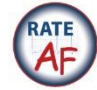

Randomised treatment arm: Group A

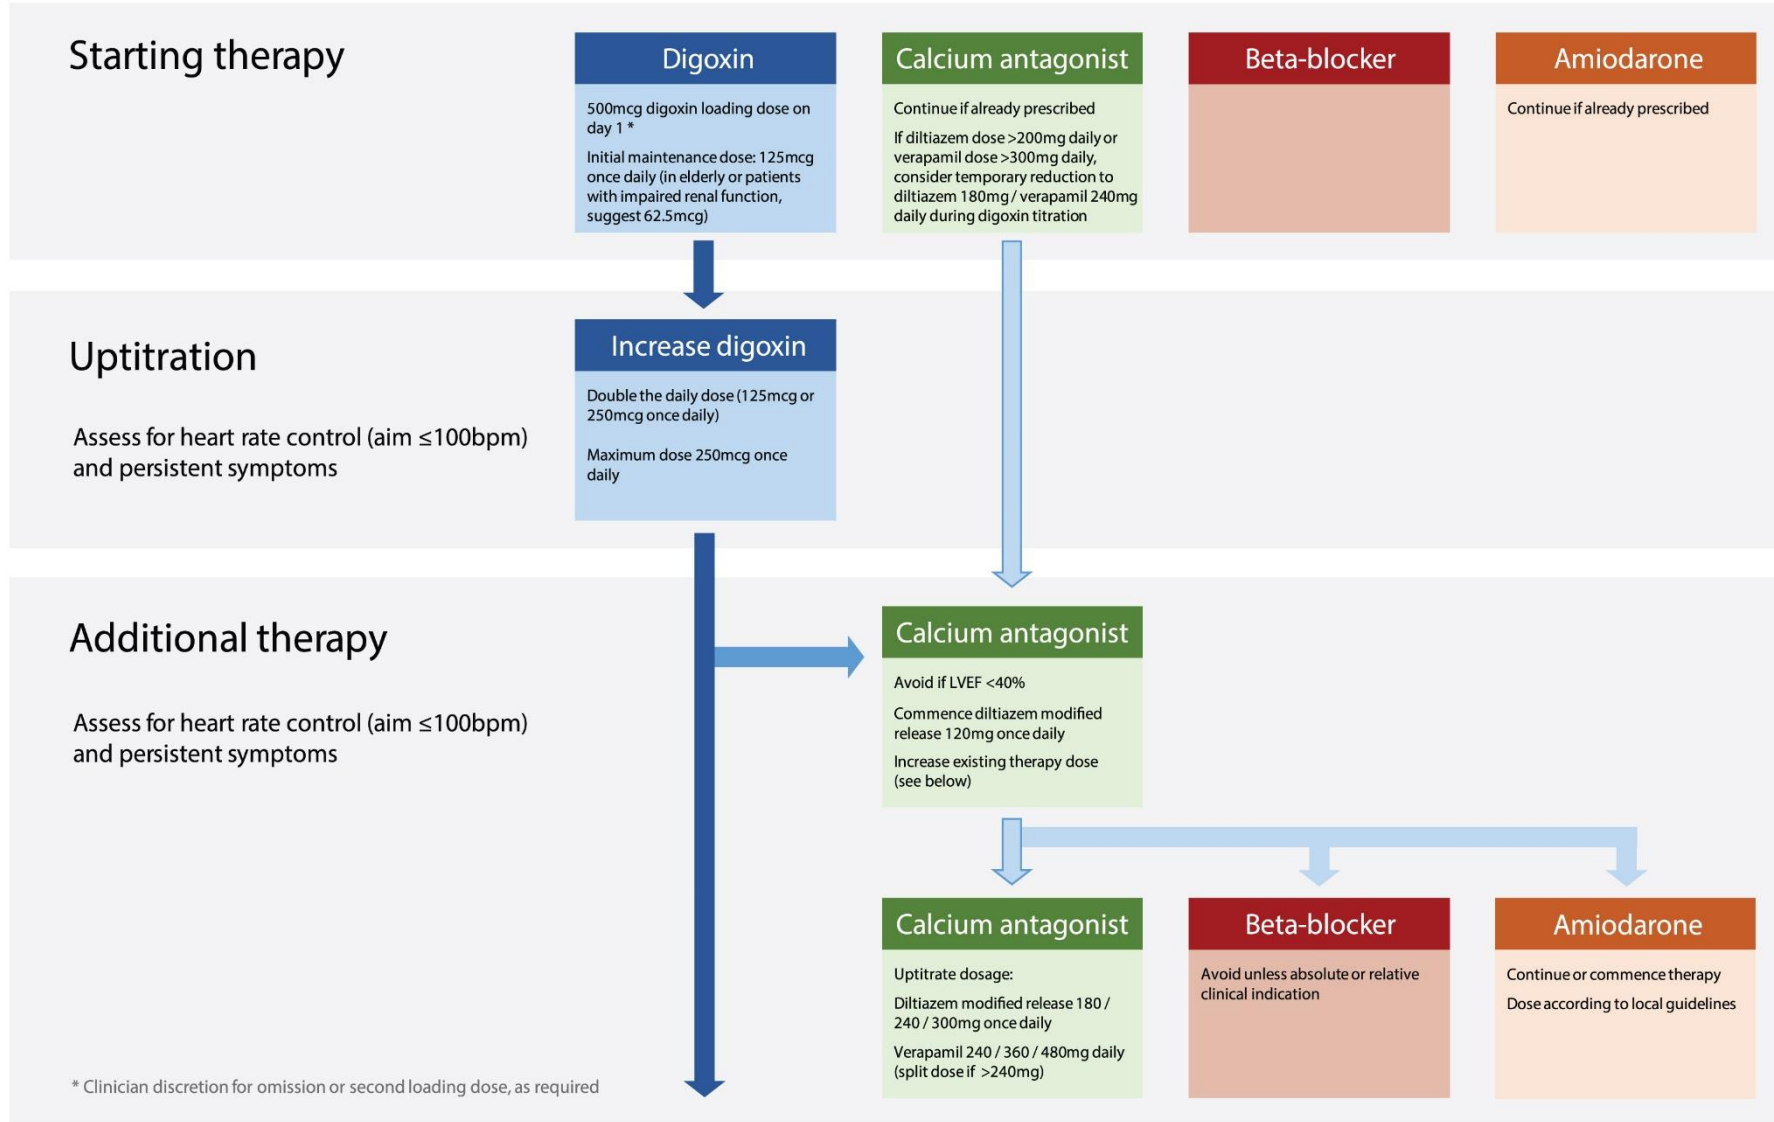

APPENDIX B – Dosing Schedule (Bisoprolol)

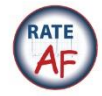

Randomised treatment arm: Group B

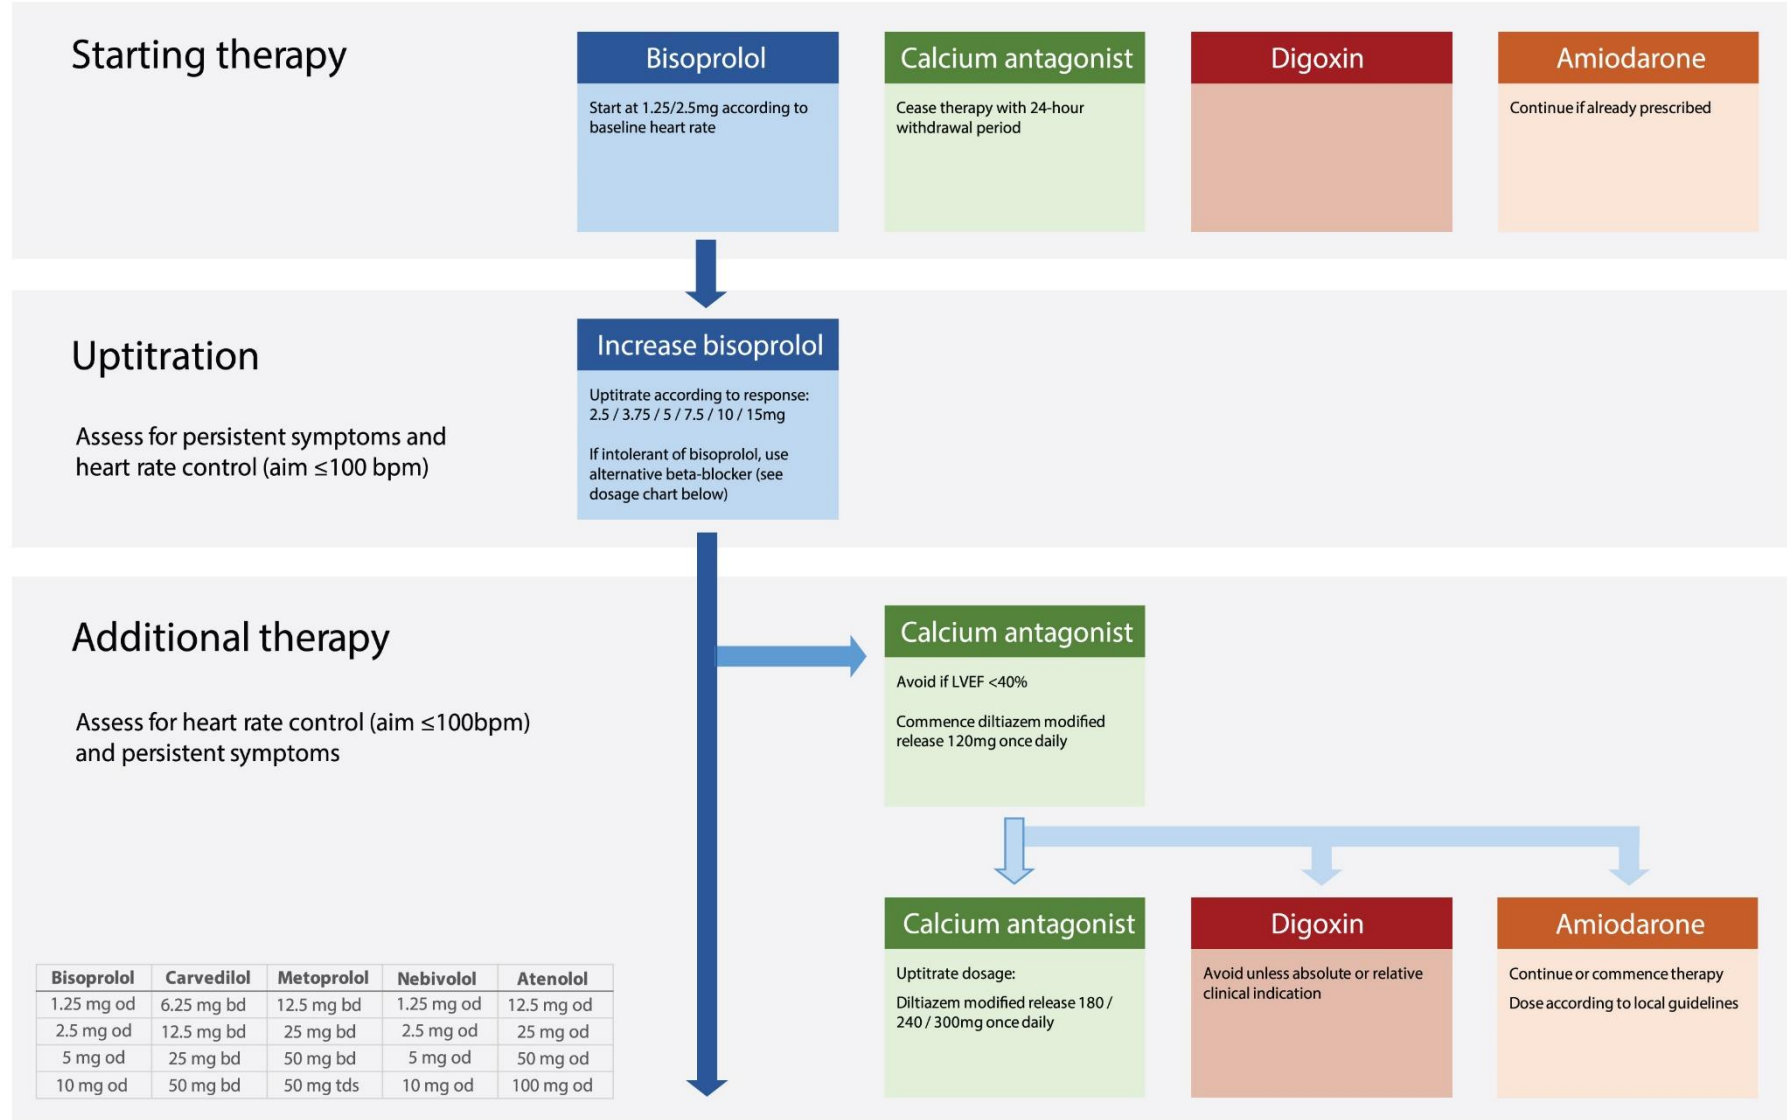

1  
2  
3  
4  
5  
6  
7  
8  
9  
10  
11  
12  
13  
14  
15  
16  
17  
18  
19  
20  
21  
22  
23  
24  
25  
26  
27  
28  
29  
30  
31  
32  
33  
34  
35  
36  
37  
38  
39  
40  
41  
42  
43  
44  
45  
46  
47

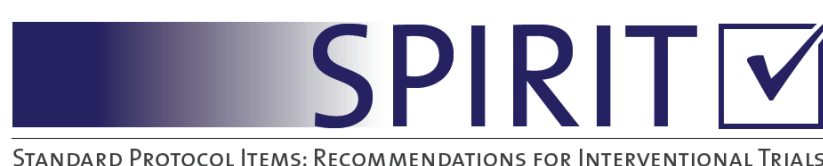

SPIRIT 2013 Checklist: Recommended items to address in a clinical trial protocol and related documents\*

| Section/item                      | Item No | Description                                                                                                                                                                                                                                                                              | Addressed on page number |
|-----------------------------------|---------|------------------------------------------------------------------------------------------------------------------------------------------------------------------------------------------------------------------------------------------------------------------------------------------|--------------------------|
| <b>Administrative information</b> |         |                                                                                                                                                                                                                                                                                          |                          |
| Title                             | 1       | Descriptive title identifying the study design, population, interventions, and, if applicable, trial acronym                                                                                                                                                                             | _____                    |
| Trial registration                | 2a      | Trial identifier and registry name. If not yet registered, name of intended registry                                                                                                                                                                                                     | _____                    |
|                                   | 2b      | All items from the World Health Organization Trial Registration Data Set                                                                                                                                                                                                                 | _____                    |
| Protocol version                  | 3       | Date and version identifier                                                                                                                                                                                                                                                              | _____                    |
| Funding                           | 4       | Sources and types of financial, material, and other support                                                                                                                                                                                                                              | _____                    |
| Roles and responsibilities        | 5a      | Names, affiliations, and roles of protocol contributors                                                                                                                                                                                                                                  | _____                    |
|                                   | 5b      | Name and contact information for the trial sponsor                                                                                                                                                                                                                                       | _____                    |
|                                   | 5c      | Role of study sponsor and funders, if any, in study design; collection, management, analysis, and interpretation of data; writing of the report; and the decision to submit the report for publication, including whether they will have ultimate authority over any of these activities | _____                    |
|                                   | 5d      | Composition, roles, and responsibilities of the coordinating centre, steering committee, endpoint adjudication committee, data management team, and other individuals or groups overseeing the trial, if applicable (see Item 21a for data monitoring committee)                         | _____                    |

|    |                                                           |     |                                                                                                                                                                                                                                                                                                                                                                                |       |
|----|-----------------------------------------------------------|-----|--------------------------------------------------------------------------------------------------------------------------------------------------------------------------------------------------------------------------------------------------------------------------------------------------------------------------------------------------------------------------------|-------|
| 1  | <b>Introduction</b>                                       |     |                                                                                                                                                                                                                                                                                                                                                                                |       |
| 2  |                                                           |     |                                                                                                                                                                                                                                                                                                                                                                                |       |
| 3  | Background and rationale                                  | 6a  | Description of research question and justification for undertaking the trial, including summary of relevant studies (published and unpublished) examining benefits and harms for each intervention                                                                                                                                                                             | _____ |
| 4  |                                                           |     |                                                                                                                                                                                                                                                                                                                                                                                |       |
| 5  |                                                           |     |                                                                                                                                                                                                                                                                                                                                                                                |       |
| 6  |                                                           |     |                                                                                                                                                                                                                                                                                                                                                                                |       |
| 7  |                                                           | 6b  | Explanation for choice of comparators                                                                                                                                                                                                                                                                                                                                          | _____ |
| 8  | Objectives                                                | 7   | Specific objectives or hypotheses                                                                                                                                                                                                                                                                                                                                              | _____ |
| 9  |                                                           |     |                                                                                                                                                                                                                                                                                                                                                                                |       |
| 10 | Trial design                                              | 8   | Description of trial design including type of trial (eg, parallel group, crossover, factorial, single group), allocation ratio, and framework (eg, superiority, equivalence, noninferiority, exploratory)                                                                                                                                                                      | _____ |
| 11 |                                                           |     |                                                                                                                                                                                                                                                                                                                                                                                |       |
| 12 |                                                           |     |                                                                                                                                                                                                                                                                                                                                                                                |       |
| 13 |                                                           |     |                                                                                                                                                                                                                                                                                                                                                                                |       |
| 14 | <b>Methods: Participants, interventions, and outcomes</b> |     |                                                                                                                                                                                                                                                                                                                                                                                |       |
| 15 |                                                           |     |                                                                                                                                                                                                                                                                                                                                                                                |       |
| 16 | Study setting                                             | 9   | Description of study settings (eg, community clinic, academic hospital) and list of countries where data will be collected. Reference to where list of study sites can be obtained                                                                                                                                                                                             | _____ |
| 17 |                                                           |     |                                                                                                                                                                                                                                                                                                                                                                                |       |
| 18 |                                                           |     |                                                                                                                                                                                                                                                                                                                                                                                |       |
| 19 | Eligibility criteria                                      | 10  | Inclusion and exclusion criteria for participants. If applicable, eligibility criteria for study centres and individuals who will perform the interventions (eg, surgeons, psychotherapists)                                                                                                                                                                                   | _____ |
| 20 |                                                           |     |                                                                                                                                                                                                                                                                                                                                                                                |       |
| 21 |                                                           |     |                                                                                                                                                                                                                                                                                                                                                                                |       |
| 22 | Interventions                                             | 11a | Interventions for each group with sufficient detail to allow replication, including how and when they will be administered                                                                                                                                                                                                                                                     | _____ |
| 23 |                                                           |     |                                                                                                                                                                                                                                                                                                                                                                                |       |
| 24 |                                                           | 11b | Criteria for discontinuing or modifying allocated interventions for a given trial participant (eg, drug dose change in response to harms, participant request, or improving/worsening disease)                                                                                                                                                                                 | _____ |
| 25 |                                                           |     |                                                                                                                                                                                                                                                                                                                                                                                |       |
| 26 |                                                           |     |                                                                                                                                                                                                                                                                                                                                                                                |       |
| 27 |                                                           | 11c | Strategies to improve adherence to intervention protocols, and any procedures for monitoring adherence (eg, drug tablet return, laboratory tests)                                                                                                                                                                                                                              | _____ |
| 28 |                                                           |     |                                                                                                                                                                                                                                                                                                                                                                                |       |
| 29 |                                                           |     |                                                                                                                                                                                                                                                                                                                                                                                |       |
| 30 |                                                           | 11d | Relevant concomitant care and interventions that are permitted or prohibited during the trial                                                                                                                                                                                                                                                                                  | _____ |
| 31 |                                                           |     |                                                                                                                                                                                                                                                                                                                                                                                |       |
| 32 | Outcomes                                                  | 12  | Primary, secondary, and other outcomes, including the specific measurement variable (eg, systolic blood pressure), analysis metric (eg, change from baseline, final value, time to event), method of aggregation (eg, median, proportion), and time point for each outcome. Explanation of the clinical relevance of chosen efficacy and harm outcomes is strongly recommended | _____ |
| 33 |                                                           |     |                                                                                                                                                                                                                                                                                                                                                                                |       |
| 34 |                                                           |     |                                                                                                                                                                                                                                                                                                                                                                                |       |
| 35 | Participant timeline                                      | 13  | Time schedule of enrolment, interventions (including any run-ins and washouts), assessments, and visits for participants. A schematic diagram is highly recommended (see Figure)                                                                                                                                                                                               | _____ |
| 36 |                                                           |     |                                                                                                                                                                                                                                                                                                                                                                                |       |
| 37 |                                                           |     |                                                                                                                                                                                                                                                                                                                                                                                |       |
| 38 |                                                           |     |                                                                                                                                                                                                                                                                                                                                                                                |       |
| 39 |                                                           |     |                                                                                                                                                                                                                                                                                                                                                                                |       |
| 40 |                                                           |     |                                                                                                                                                                                                                                                                                                                                                                                |       |
| 41 |                                                           |     |                                                                                                                                                                                                                                                                                                                                                                                |       |
| 42 |                                                           |     |                                                                                                                                                                                                                                                                                                                                                                                |       |
| 43 |                                                           |     |                                                                                                                                                                                                                                                                                                                                                                                |       |
| 44 |                                                           |     |                                                                                                                                                                                                                                                                                                                                                                                |       |
| 45 |                                                           |     |                                                                                                                                                                                                                                                                                                                                                                                |       |
| 46 |                                                           |     |                                                                                                                                                                                                                                                                                                                                                                                |       |
| 47 |                                                           |     |                                                                                                                                                                                                                                                                                                                                                                                |       |

1 Sample size 14 Estimated number of participants needed to achieve study objectives and how it was determined, including \_\_\_\_\_  
 2 clinical and statistical assumptions supporting any sample size calculations

3  
 4 Recruitment 15 Strategies for achieving adequate participant enrolment to reach target sample size \_\_\_\_\_  
 5

### 6 7 **Methods: Assignment of interventions (for controlled trials)**

#### 8 9 Allocation:

10 Sequence 16a Method of generating the allocation sequence (eg, computer-generated random numbers), and list of any \_\_\_\_\_  
 11 generation factors for stratification. To reduce predictability of a random sequence, details of any planned restriction  
 12 (eg, blocking) should be provided in a separate document that is unavailable to those who enrol participants  
 13 or assign interventions  
 14

15  
 16 Allocation 16b Mechanism of implementing the allocation sequence (eg, central telephone; sequentially numbered, \_\_\_\_\_  
 17 concealment opaque, sealed envelopes), describing any steps to conceal the sequence until interventions are assigned  
 18 mechanism  
 19

20 Implementation 16c Who will generate the allocation sequence, who will enrol participants, and who will assign participants to \_\_\_\_\_  
 21 interventions  
 22

23 Blinding (masking) 17a Who will be blinded after assignment to interventions (eg, trial participants, care providers, outcome \_\_\_\_\_  
 24 assessors, data analysts), and how  
 25

26  
 27 17b If blinded, circumstances under which unblinding is permissible, and procedure for revealing a participant's \_\_\_\_\_  
 28 allocated intervention during the trial  
 29

### 30 31 32 **Methods: Data collection, management, and analysis**

33  
 34 Data collection 18a Plans for assessment and collection of outcome, baseline, and other trial data, including any related \_\_\_\_\_  
 35 methods processes to promote data quality (eg, duplicate measurements, training of assessors) and a description of  
 36 study instruments (eg, questionnaires, laboratory tests) along with their reliability and validity, if known.  
 37 Reference to where data collection forms can be found, if not in the protocol  
 38

39  
 40 18b Plans to promote participant retention and complete follow-up, including list of any outcome data to be \_\_\_\_\_  
 41 collected for participants who discontinue or deviate from intervention protocols  
 42  
 43  
 44

|    |                     |     |                                                                                                                                                                                                                                                                   |       |
|----|---------------------|-----|-------------------------------------------------------------------------------------------------------------------------------------------------------------------------------------------------------------------------------------------------------------------|-------|
| 1  | Data management     | 19  | Plans for data entry, coding, security, and storage, including any related processes to promote data quality (eg, double data entry; range checks for data values). Reference to where details of data management procedures can be found, if not in the protocol | _____ |
| 2  |                     |     |                                                                                                                                                                                                                                                                   |       |
| 3  |                     |     |                                                                                                                                                                                                                                                                   |       |
| 4  |                     |     |                                                                                                                                                                                                                                                                   |       |
| 5  | Statistical methods | 20a | Statistical methods for analysing primary and secondary outcomes. Reference to where other details of the statistical analysis plan can be found, if not in the protocol                                                                                          | _____ |
| 6  |                     |     |                                                                                                                                                                                                                                                                   |       |
| 7  |                     |     |                                                                                                                                                                                                                                                                   |       |
| 8  |                     | 20b | Methods for any additional analyses (eg, subgroup and adjusted analyses)                                                                                                                                                                                          | _____ |
| 9  |                     |     |                                                                                                                                                                                                                                                                   |       |
| 10 |                     | 20c | Definition of analysis population relating to protocol non-adherence (eg, as randomised analysis), and any statistical methods to handle missing data (eg, multiple imputation)                                                                                   | _____ |
| 11 |                     |     |                                                                                                                                                                                                                                                                   |       |
| 12 |                     |     |                                                                                                                                                                                                                                                                   |       |
| 13 |                     |     |                                                                                                                                                                                                                                                                   |       |
| 14 |                     |     |                                                                                                                                                                                                                                                                   |       |

**Methods: Monitoring**

|    |                 |     |                                                                                                                                                                                                                                                                                                                                       |       |
|----|-----------------|-----|---------------------------------------------------------------------------------------------------------------------------------------------------------------------------------------------------------------------------------------------------------------------------------------------------------------------------------------|-------|
| 15 |                 |     |                                                                                                                                                                                                                                                                                                                                       |       |
| 16 |                 |     |                                                                                                                                                                                                                                                                                                                                       |       |
| 17 | Data monitoring | 21a | Composition of data monitoring committee (DMC); summary of its role and reporting structure; statement of whether it is independent from the sponsor and competing interests; and reference to where further details about its charter can be found, if not in the protocol. Alternatively, an explanation of why a DMC is not needed | _____ |
| 18 |                 |     |                                                                                                                                                                                                                                                                                                                                       |       |
| 19 |                 |     |                                                                                                                                                                                                                                                                                                                                       |       |
| 20 |                 |     |                                                                                                                                                                                                                                                                                                                                       |       |
| 21 |                 |     |                                                                                                                                                                                                                                                                                                                                       |       |
| 22 |                 | 21b | Description of any interim analyses and stopping guidelines, including who will have access to these interim results and make the final decision to terminate the trial                                                                                                                                                               | _____ |
| 23 |                 |     |                                                                                                                                                                                                                                                                                                                                       |       |
| 24 |                 |     |                                                                                                                                                                                                                                                                                                                                       |       |
| 25 |                 |     |                                                                                                                                                                                                                                                                                                                                       |       |
| 26 | Harms           | 22  | Plans for collecting, assessing, reporting, and managing solicited and spontaneously reported adverse events and other unintended effects of trial interventions or trial conduct                                                                                                                                                     | _____ |
| 27 |                 |     |                                                                                                                                                                                                                                                                                                                                       |       |
| 28 |                 |     |                                                                                                                                                                                                                                                                                                                                       |       |
| 29 | Auditing        | 23  | Frequency and procedures for auditing trial conduct, if any, and whether the process will be independent from investigators and the sponsor                                                                                                                                                                                           | _____ |
| 30 |                 |     |                                                                                                                                                                                                                                                                                                                                       |       |
| 31 |                 |     |                                                                                                                                                                                                                                                                                                                                       |       |
| 32 |                 |     |                                                                                                                                                                                                                                                                                                                                       |       |

**Ethics and dissemination**

|    |                          |    |                                                                                                                                                                                                                                  |       |
|----|--------------------------|----|----------------------------------------------------------------------------------------------------------------------------------------------------------------------------------------------------------------------------------|-------|
| 33 |                          |    |                                                                                                                                                                                                                                  |       |
| 34 |                          |    |                                                                                                                                                                                                                                  |       |
| 35 | Research ethics approval | 24 | Plans for seeking research ethics committee/institutional review board (REC/IRB) approval                                                                                                                                        | _____ |
| 36 |                          |    |                                                                                                                                                                                                                                  |       |
| 37 |                          |    |                                                                                                                                                                                                                                  |       |
| 38 | Protocol amendments      | 25 | Plans for communicating important protocol modifications (eg, changes to eligibility criteria, outcomes, analyses) to relevant parties (eg, investigators, REC/IRBs, trial participants, trial registries, journals, regulators) | _____ |
| 39 |                          |    |                                                                                                                                                                                                                                  |       |
| 40 |                          |    |                                                                                                                                                                                                                                  |       |
| 41 |                          |    |                                                                                                                                                                                                                                  |       |
| 42 |                          |    |                                                                                                                                                                                                                                  |       |
| 43 |                          |    |                                                                                                                                                                                                                                  |       |



|    |                      |     |                                                                                                                 |       |
|----|----------------------|-----|-----------------------------------------------------------------------------------------------------------------|-------|
| 1  | Consent or assent    | 26a | Who will obtain informed consent or assent from potential trial participants or authorised surrogates, and      | _____ |
| 2  |                      |     | how (see Item 32)                                                                                               |       |
| 3  |                      |     |                                                                                                                 |       |
| 4  |                      | 26b | Additional consent provisions for collection and use of participant data and biological specimens in ancillary  | _____ |
| 5  |                      |     | studies, if applicable                                                                                          |       |
| 6  |                      |     |                                                                                                                 |       |
| 7  | Confidentiality      | 27  | How personal information about potential and enrolled participants will be collected, shared, and maintained    | _____ |
| 8  |                      |     | in order to protect confidentiality before, during, and after the trial                                         |       |
| 9  |                      |     |                                                                                                                 |       |
| 10 | Declaration of       | 28  | Financial and other competing interests for principal investigators for the overall trial and each study site   | _____ |
| 11 | interests            |     |                                                                                                                 |       |
| 12 |                      |     |                                                                                                                 |       |
| 13 |                      |     |                                                                                                                 |       |
| 14 | Access to data       | 29  | Statement of who will have access to the final trial dataset, and disclosure of contractual agreements that     | _____ |
| 15 |                      |     | limit such access for investigators                                                                             |       |
| 16 |                      |     |                                                                                                                 |       |
| 17 | Ancillary and post-  | 30  | Provisions, if any, for ancillary and post-trial care, and for compensation to those who suffer harm from trial | _____ |
| 18 | trial care           |     | participation                                                                                                   |       |
| 19 |                      |     |                                                                                                                 |       |
| 20 | Dissemination policy | 31a | Plans for investigators and sponsor to communicate trial results to participants, healthcare professionals,     | _____ |
| 21 |                      |     | the public, and other relevant groups (eg, via publication, reporting in results databases, or other data       |       |
| 22 |                      |     | sharing arrangements), including any publication restrictions                                                   |       |
| 23 |                      |     |                                                                                                                 |       |
| 24 |                      |     |                                                                                                                 |       |
| 25 |                      | 31b | Authorship eligibility guidelines and any intended use of professional writers                                  | _____ |
| 26 |                      |     |                                                                                                                 |       |
| 27 |                      | 31c | Plans, if any, for granting public access to the full protocol, participant-level dataset, and statistical code | _____ |
| 28 |                      |     |                                                                                                                 |       |
| 29 |                      |     |                                                                                                                 |       |
| 30 | <b>Appendices</b>    |     |                                                                                                                 |       |
| 31 |                      |     |                                                                                                                 |       |
| 32 | Informed consent     | 32  | Model consent form and other related documentation given to participants and authorised surrogates              | _____ |
| 33 | materials            |     |                                                                                                                 |       |
| 34 |                      |     |                                                                                                                 |       |
| 35 | Biological           | 33  | Plans for collection, laboratory evaluation, and storage of biological specimens for genetic or molecular       | _____ |
| 36 | specimens            |     | analysis in the current trial and for future use in ancillary studies, if applicable                            |       |
| 37 |                      |     |                                                                                                                 |       |

\*It is strongly recommended that this checklist be read in conjunction with the SPIRIT 2013 Explanation & Elaboration for important clarification on the items. Amendments to the protocol should be tracked and dated. The SPIRIT checklist is copyrighted by the SPIRIT Group under the Creative Commons "[Attribution-NonCommercial-NoDerivs 3.0 Unported](https://creativecommons.org/licenses/by-nc-nd/3.0/)" license.

# BMJ Open

## A review of rate control in atrial fibrillation, and the rationale and protocol for the RATE-AF trial

|                                 |                                                                                                                                                                                                                                                                                                                                                                                                                                                                                                                                                                                                                                                                                                                                                                                                                                                                                                                                                                                                                                                                                                                                                                                                                                                                                                                                                                                                                                                                 |
|---------------------------------|-----------------------------------------------------------------------------------------------------------------------------------------------------------------------------------------------------------------------------------------------------------------------------------------------------------------------------------------------------------------------------------------------------------------------------------------------------------------------------------------------------------------------------------------------------------------------------------------------------------------------------------------------------------------------------------------------------------------------------------------------------------------------------------------------------------------------------------------------------------------------------------------------------------------------------------------------------------------------------------------------------------------------------------------------------------------------------------------------------------------------------------------------------------------------------------------------------------------------------------------------------------------------------------------------------------------------------------------------------------------------------------------------------------------------------------------------------------------|
| Journal:                        | <i>BMJ Open</i>                                                                                                                                                                                                                                                                                                                                                                                                                                                                                                                                                                                                                                                                                                                                                                                                                                                                                                                                                                                                                                                                                                                                                                                                                                                                                                                                                                                                                                                 |
| Manuscript ID                   | bmjopen-2016-015099.R1                                                                                                                                                                                                                                                                                                                                                                                                                                                                                                                                                                                                                                                                                                                                                                                                                                                                                                                                                                                                                                                                                                                                                                                                                                                                                                                                                                                                                                          |
| Article Type:                   | Protocol                                                                                                                                                                                                                                                                                                                                                                                                                                                                                                                                                                                                                                                                                                                                                                                                                                                                                                                                                                                                                                                                                                                                                                                                                                                                                                                                                                                                                                                        |
| Date Submitted by the Author:   | 28-Feb-2017                                                                                                                                                                                                                                                                                                                                                                                                                                                                                                                                                                                                                                                                                                                                                                                                                                                                                                                                                                                                                                                                                                                                                                                                                                                                                                                                                                                                                                                     |
| Complete List of Authors:       | <p>Kotecha, Dipak; University of Birmingham, Institute of Cardiovascular Sciences; University Hospitals Birmingham NHS Trust, Cardiology<br/>           Calvert, Melanie; University of Birmingham, Centre for Patient Reported Outcomes Research; University of Birmingham, Institute of Applied Health Research<br/>           Deeks, Jon; University of Birmingham, Birmingham Clinical Trials Unit; University of Birmingham, Institute of Applied Health Research<br/>           Griffith, Mike; University Hospitals Birmingham NHS Trust, Cardiology<br/>           Kirchhof, Paulus; University of Birmingham, Institute of Cardiovascular Sciences; Sandwell &amp; West Birmingham Hospitals NHS Trust, Cardiology<br/>           Lip, Gregory; University of Birmingham, Institute of Cardiovascular Sciences; Sandwell &amp; West Birmingham Hospitals NHS Trust, Cardiology<br/>           Mehta, Samir; University of Birmingham, Birmingham Clinical Trials Unit<br/>           Slinn, Gemma; University of Birmingham, Birmingham Clinical Trials Unit<br/>           Stanbury, Mary; (Lead for the patient involvement panel)<br/>           Steeds, Richard; University Hospitals Birmingham NHS Trust, Cardiology; University of Birmingham, Institute of Cardiovascular Sciences<br/>           Townend, Jonathan; University Hospitals Birmingham NHS Trust, Cardiology; University of Birmingham, Institute of Cardiovascular Sciences</p> |
| <b>Primary Subject Heading</b>: | Cardiovascular medicine                                                                                                                                                                                                                                                                                                                                                                                                                                                                                                                                                                                                                                                                                                                                                                                                                                                                                                                                                                                                                                                                                                                                                                                                                                                                                                                                                                                                                                         |
| Secondary Subject Heading:      | Evidence based practice, Medical management, Patient-centred medicine                                                                                                                                                                                                                                                                                                                                                                                                                                                                                                                                                                                                                                                                                                                                                                                                                                                                                                                                                                                                                                                                                                                                                                                                                                                                                                                                                                                           |
| Keywords:                       | Atrial fibrillation, heart rate, quality of life, Echocardiography < CARDIOLOGY, Protocols & guidelines < HEALTH SERVICES ADMINISTRATION & MANAGEMENT, RATE-AF                                                                                                                                                                                                                                                                                                                                                                                                                                                                                                                                                                                                                                                                                                                                                                                                                                                                                                                                                                                                                                                                                                                                                                                                                                                                                                  |
|                                 |                                                                                                                                                                                                                                                                                                                                                                                                                                                                                                                                                                                                                                                                                                                                                                                                                                                                                                                                                                                                                                                                                                                                                                                                                                                                                                                                                                                                                                                                 |

SCHOLARONE™  
Manuscripts

**Title: A review of rate control in atrial fibrillation,  
and the rationale and protocol for the RATE-  
AF trial**



Brief Title: Kotecha *et al*, Rate control therapy evaluation in atrial fibrillation

Authors: Dr Dipak Kotecha MBChB PhD MRCP FESC FHEA<sup>1,2,3,4\*</sup>, Prof Melanie Calvert BSc PhD FHEA<sup>4,5</sup>, Prof Jonathan J Deeks BSc MSc PhD CStat<sup>5,6</sup>, Dr Michael Griffith MD FRCP<sup>2</sup>, Prof Paulus Kirchhof MD FRCP FESC<sup>1,2,3,4</sup>, Prof Gregory YH Lip MD FRCP DFM FESC<sup>1,3,4</sup>, Samir Mehta MSc BSc<sup>6</sup>, Gemma Slinn BSc MPhil<sup>6</sup>, Mary Stanbury RGN RDN RHV\*\*, Dr Richard P Steeds MA MD FRCP FESC<sup>1,2</sup> and Prof Jonathan N Townend BSc MBChB MD FESC<sup>1,2</sup>.

From the (1) Institute of Cardiovascular Sciences, University of Birmingham, Birmingham, UK; (2) University Hospitals Birmingham NHS Trust, Birmingham, UK; (3) Sandwell & West Birmingham Hospitals NHS Trust, Birmingham, UK; (4) Centre for Patient Reported Outcomes Research, University of Birmingham, Birmingham, UK; (5) Institute of Applied Health Research, University of Birmingham, Birmingham, UK; and (6) Birmingham Clinical Trials Unit, University of Birmingham, Birmingham, UK. \* Authors after the Chief Investigator listed in alphabetical order. \*\* Lead for the Patient Involvement Panel.

Address for correspondence:

Dr Dipak Kotecha

University of Birmingham Institute of Cardiovascular Sciences, Institute of Translational Medicine, Heritage Building, Queen Elizabeth Hospital Birmingham, B15 2TH, UK.

Email: [d.kotecha@bham.ac.uk](mailto:d.kotecha@bham.ac.uk) Tel: +44 121 371 8122 Fax: +44 121 554 4083

Word count (text): 2886

Word count (abstract): 298

1  
2  
3  
4  
5  
6  
7  
8  
9  
10  
11  
12  
13  
14  
15  
16  
17  
18  
19  
20  
21  
22  
23  
24  
25  
26  
27  
28  
29  
30  
31  
32  
33  
34  
35  
36  
37  
38  
39  
40  
41  
42  
43  
44  
45  
46  
47  
48  
49  
50  
51  
52  
53  
54  
55  
56  
57  
58  
59  
60

**Key Words:** Atrial fibrillation; heart rate; Protocols & guidelines<health services  
administration & management; RATE-AF trial; quality of life;  
echocardiography<cardiology.

For peer review only

## Abstract

**Background & Objective:** Atrial fibrillation (AF) is common and causes impaired quality of life, an increased risk of stroke and death, as well as frequent hospital admissions. The majority of patients with AF require control of heart rate. In this article we summarise the limited evidence from clinical trials that guides prescription, and present the rationale and protocol for a new randomised trial. As rate control has not, as yet, been shown to reduce mortality, there is a clear need to compare the impact of therapy on quality of life, cardiac function and exercise capacity. Such a trial should concentrate on the longer-term effects of treatment in the largest proportion of AF patients, those with symptomatic permanent AF, with the aim of improving patient well-being.

**Design & Intervention:** The RAte control Therapy Evaluation in permanent Atrial Fibrillation (RATE-AF) trial will enrol 160 participants with a prospective, randomised, open-label, blinded end-point design comparing initial rate control with digoxin or bisoprolol. This will be the first head-to-head randomised trial of digoxin and beta-blockers in AF.

**Participants:** Recruited patients will be aged  $\geq 60$  years with permanent AF and symptoms of breathlessness (NYHA Class II or above), with few exclusion criteria to maximise generalisability to routine clinical practice.

**Outcome measures:** The primary outcome is patient-reported quality of life, with secondary outcomes including echocardiographic ventricular function, exercise capacity and biomarkers of cellular and clinical response. Follow-up will occur at 6 and 12 months, with feasibility components to inform the design of a future trial powered to detect a difference in hospital admission. The RATE-AF trial will underpin an integrated approach to management including biomarkers, function and symptoms that will guide future research into optimal, personalised rate control in patients with AF.

**Ethical approval:** East Midlands-Derby Research Ethics Committee (16/EM/0178).

**Trial registration:** [clinicaltrials.gov:NCT02391337](https://clinicaltrials.gov/ct2/show/study/NCT02391337); [ISRCTN:95259705](https://www.isrctn.com/ISRCTN95259705).

## Strengths and limitations of this study

- Control of heart rate is universally used in patients with atrial fibrillation, but evidence from good quality randomised trials is extremely limited.
- Despite common clinical use, there has never been a direct randomised comparison of beta-blockers and digoxin for heart rate control in AF patients (with or without heart failure).
- The RATE-AF trial will assess the effect of therapy on patient-reported quality of life, and improve methods to capture this information in patients with AF. The trial will also evaluate the longer-term impact on cardiac function, define reproducible methods to measure systolic and diastolic function in AF, and develop new biomarkers for personalisation of treatment.
- The trial will not have the power to identify differences in clinical events, but will allow us to plan a future trial designed to detect a difference in the need for admissions to hospital.

## Introduction

Atrial fibrillation (AF) is a common cause of stroke and cardiovascular death, leads to poor quality of life and doubles the risk of hospital admission.<sup>1</sup> We are currently in the midst of an epidemic of AF, with both incidence and prevalence expected to double in the next 20 years.<sup>2-4</sup> Although AF can affect any age-group, patients are typically elderly with significant comorbidities, including up to 50% suffering from heart failure.<sup>5</sup> AF is both a cause and consequence of heart failure, with complex interactions leading to impairment of systolic and diastolic function.<sup>6,7</sup> The combination of these two conditions is expected to have a dramatic impact on the burden of healthcare worldwide.<sup>8-11</sup>

Management of AF involves anticoagulation to prevent strokes, selecting appropriate patients for restoration of sinus rhythm and almost universal need for control of heart rate. In contrast to other management strategies, the choice of rate control therapy has a very low-quality evidence-base (**Figure 1**).<sup>12</sup> Guidelines from the National Institute for Health and Care Excellence (NICE) and the European Society of Cardiology (ESC) have mandated further research specifically on rate control<sup>1,13</sup>, which is also reflected in the level of recommendations from the American Heart Association.<sup>14</sup> The small studies currently available are often uncontrolled or with short follow-up<sup>15-19</sup>, providing few insights on the biological effects of treatment or the mechanisms underpinning the response to therapy. With no evidence for any impact of rate control on mortality<sup>20,21</sup>, and limited data for any difference in quality of life or functional outcomes, the choice of rate control agent is currently informed by expert consensus and physician experience.

In this paper, we review the current evidence-base for rate control in AF and the rationale for a new randomised controlled trial (RCT). The RAte control Therapy Evaluation in permanent Atrial Fibrillation (RATE-AF) trial will compare initial therapy with beta-blockers versus digoxin in older patients with symptomatic permanent AF, assessing quality of life, functional

1 capacity, left-ventricular ejection fraction (LVEF), diastolic function and biomarkers of  
2  
3 treatment response.  
4  
5  
6  
7  
8  
9

## 10 **Rationale for a new trial of rate control in AF**

### 11 **Why not choose a rhythm control strategy?**

12  
13  
14  
15  
16  
17 A number of RCTs have assessed the addition of rhythm control strategies to control of heart  
18 rate in AF patients, most often with anti-arrhythmic drugs (AAD) and direct current  
19 cardioversion. Neither of the two largest trials (AFFIRM or RACE) found any difference in  
20 clinical outcomes comparing these approaches.<sup>22 23</sup> Meta-analyses and other smaller trials have  
21 confirmed that rhythm control is not superior to regulation of heart rate alone,<sup>24-26</sup> including  
22 heart failure patients with both impaired and preserved ejection fraction.<sup>27 28</sup> These studies  
23 have analysed heterogeneous populations, including both paroxysmal and permanent AF that  
24 may differ with regards to mechanism, prognosis and the response to treatment.<sup>15</sup> However  
25 there is also evidence that a rhythm control strategy may increase hospital admissions. A meta-  
26 analysis of major published trials is presented in **Figure 2**, highlighting a 17% increase in the  
27 risk of hospitalisation in the rhythm control group (after exclusion of hospital visits related to  
28 cardioversion). Although limited by patient crossover and the association between AAD and  
29 adverse events,<sup>29</sup> the results highlight the importance of trials comparing different rate control  
30 options and associated healthcare costs.  
31  
32  
33  
34  
35  
36  
37  
38  
39  
40  
41  
42  
43  
44  
45  
46  
47

48 Although AF ablation is becoming increasingly popular it remains a highly invasive  
49 method to restore sinus rhythm.<sup>30 31</sup> Current guidelines recommend ablation to improve AF-  
50 related symptoms in patients with paroxysmal AF, or as a treatment option in symptomatic  
51 persistent AF that is refractory to other therapy.<sup>1 14</sup> Long-term outcome studies are awaited and  
52 need to be balanced against procedural complications and AF recurrence. Even in patients  
53  
54  
55  
56  
57  
58  
59  
60



1 receiving intensive rhythm control therapy, rate control is often necessary to reduce symptoms  
2 during AF paroxysms. Further, 40-50% of AF patients are deemed as unsuitable for rhythm  
3 control (permanent AF),<sup>5 32</sup> and are maintained on rate control therapy to reduce potential  
4 symptoms and avoid tachycardia that may worsen ventricular function.<sup>6</sup> Patients with  
5 permanent AF have a higher residual risk of cardiovascular death, stroke or systemic  
6 embolism, despite anticoagulation.<sup>33</sup>

### **What is the optimal heart rate target in AF?**

7  
8  
9  
10  
11  
12  
13  
14  
15  
16  
17  
18  
19  
20 There is clinical uncertainty about how to control heart rate and the intensity of rate-reduction.  
21 In the RACE II trial of 614 randomised patients with permanent AF, there were no benefits of  
22 strict (<80 bpm at rest) compared to lenient rate control (resting heart rate <110 bpm) over 3  
23 years of follow-up.<sup>34</sup> Although interpretation was limited by the narrow difference in heart rate  
24 between groups, lenient rate control was found to be non-inferior with an adjusted hazard ratio  
25 of 0.80 (90% CI 0.55-1.17) for a wide composite of adverse clinical outcomes (12.9%,  
26 compared to 14.9% in the strict control arm). In addition, there were no differences in  
27 symptoms or NYHA class,<sup>34 35</sup> and patients achieving strict rate control required more clinic  
28 visits.<sup>36</sup> These findings are consistent with other trials,<sup>37-39</sup> registries,<sup>32</sup> and even observational  
29 cohorts in patients with concomitant heart failure,<sup>40</sup> suggesting that intensity of heart rate  
30 control is not the key determinant of outcomes in AF.

### **Do outcomes vary with different rate control therapies?**

31  
32  
33  
34  
35  
36  
37  
38  
39  
40  
41  
42  
43  
44  
45  
46  
47  
48  
49 Medical therapy to achieve rate control in AF can be achieved with beta-blockers, digoxin and  
50 non-dihydropyridine calcium channel blockers (CCB; diltiazem or verapamil).<sup>1</sup> Only a limited  
51 evidence-base is available to assist clinicians in choosing first-line and subsequent therapy,  
52 resulting in wide variations in clinical practice,<sup>41-43</sup> and frequent use of combination therapy.  
53  
54  
55  
56  
57  
58  
59  
60  
61  
62  
63  
64  
65  
66  
67  
68  
69  
70  
71  
72  
73  
74  
75  
76  
77  
78  
79  
80  
81  
82  
83  
84  
85  
86  
87  
88  
89  
90  
91  
92  
93  
94  
95  
96  
97  
98  
99  
100  
101  
102  
103  
104  
105  
106  
107  
108  
109  
110  
111  
112  
113  
114  
115  
116  
117  
118  
119  
120  
121  
122  
123  
124  
125  
126  
127  
128  
129  
130  
131  
132  
133  
134  
135  
136  
137  
138  
139  
140  
141  
142  
143  
144  
145  
146  
147  
148  
149  
150  
151  
152  
153  
154  
155  
156  
157  
158  
159  
160  
161  
162  
163  
164  
165  
166  
167  
168  
169  
170  
171  
172  
173  
174  
175  
176  
177  
178  
179  
180  
181  
182  
183  
184  
185  
186  
187  
188  
189  
190  
191  
192  
193  
194  
195  
196  
197  
198  
199  
200  
201  
202  
203  
204  
205  
206  
207  
208  
209  
210  
211  
212  
213  
214  
215  
216  
217  
218  
219  
220  
221  
222  
223  
224  
225  
226  
227  
228  
229  
230  
231  
232  
233  
234  
235  
236  
237  
238  
239  
240  
241  
242  
243  
244  
245  
246  
247  
248  
249  
250  
251  
252  
253  
254  
255  
256  
257  
258  
259  
260  
261  
262  
263  
264  
265  
266  
267  
268  
269  
270  
271  
272  
273  
274  
275  
276  
277  
278  
279  
280  
281  
282  
283  
284  
285  
286  
287  
288  
289  
290  
291  
292  
293  
294  
295  
296  
297  
298  
299  
300  
301  
302  
303  
304  
305  
306  
307  
308  
309  
310  
311  
312  
313  
314  
315  
316  
317  
318  
319  
320  
321  
322  
323  
324  
325  
326  
327  
328  
329  
330  
331  
332  
333  
334  
335  
336  
337  
338  
339  
340  
341  
342  
343  
344  
345  
346  
347  
348  
349  
350  
351  
352  
353  
354  
355  
356  
357  
358  
359  
360  
361  
362  
363  
364  
365  
366  
367  
368  
369  
370  
371  
372  
373  
374  
375  
376  
377  
378  
379  
380  
381  
382  
383  
384  
385  
386  
387  
388  
389  
390  
391  
392  
393  
394  
395  
396  
397  
398  
399  
400  
401  
402  
403  
404  
405  
406  
407  
408  
409  
410  
411  
412  
413  
414  
415  
416  
417  
418  
419  
420  
421  
422  
423  
424  
425  
426  
427  
428  
429  
430  
431  
432  
433  
434  
435  
436  
437  
438  
439  
440  
441  
442  
443  
444  
445  
446  
447  
448  
449  
450  
451  
452  
453  
454  
455  
456  
457  
458  
459  
460  
461  
462  
463  
464  
465  
466  
467  
468  
469  
470  
471  
472  
473  
474  
475  
476  
477  
478  
479  
480  
481  
482  
483  
484  
485  
486  
487  
488  
489  
490  
491  
492  
493  
494  
495  
496  
497  
498  
499  
500  
501  
502  
503  
504  
505  
506  
507  
508  
509  
510  
511  
512  
513  
514  
515  
516  
517  
518  
519  
520  
521  
522  
523  
524  
525  
526  
527  
528  
529  
530  
531  
532  
533  
534  
535  
536  
537  
538  
539  
540  
541  
542  
543  
544  
545  
546  
547  
548  
549  
550  
551  
552  
553  
554  
555  
556  
557  
558  
559  
560  
561  
562  
563  
564  
565  
566  
567  
568  
569  
570  
571  
572  
573  
574  
575  
576  
577  
578  
579  
580  
581  
582  
583  
584  
585  
586  
587  
588  
589  
590  
591  
592  
593  
594  
595  
596  
597  
598  
599  
600  
601  
602  
603  
604  
605  
606  
607  
608  
609  
610  
611  
612  
613  
614  
615  
616  
617  
618  
619  
620  
621  
622  
623  
624  
625  
626  
627  
628  
629  
630  
631  
632  
633  
634  
635  
636  
637  
638  
639  
640  
641  
642  
643  
644  
645  
646  
647  
648  
649  
650  
651  
652  
653  
654  
655  
656  
657  
658  
659  
660  
661  
662  
663  
664  
665  
666  
667  
668  
669  
670  
671  
672  
673  
674  
675  
676  
677  
678  
679  
680  
681  
682  
683  
684  
685  
686  
687  
688  
689  
690  
691  
692  
693  
694  
695  
696  
697  
698  
699  
700  
701  
702  
703  
704  
705  
706  
707  
708  
709  
710  
711  
712  
713  
714  
715  
716  
717  
718  
719  
720  
721  
722  
723  
724  
725  
726  
727  
728  
729  
730  
731  
732  
733  
734  
735  
736  
737  
738  
739  
740  
741  
742  
743  
744  
745  
746  
747  
748  
749  
750  
751  
752  
753  
754  
755  
756  
757  
758  
759  
760  
761  
762  
763  
764  
765  
766  
767  
768  
769  
770  
771  
772  
773  
774  
775  
776  
777  
778  
779  
780  
781  
782  
783  
784  
785  
786  
787  
788  
789  
790  
791  
792  
793  
794  
795  
796  
797  
798  
799  
800  
801  
802  
803  
804  
805  
806  
807  
808  
809  
810  
811  
812  
813  
814  
815  
816  
817  
818  
819  
820  
821  
822  
823  
824  
825  
826  
827  
828  
829  
830  
831  
832  
833  
834  
835  
836  
837  
838  
839  
840  
841  
842  
843  
844  
845  
846  
847  
848  
849  
850  
851  
852  
853  
854  
855  
856  
857  
858  
859  
860  
861  
862  
863  
864  
865  
866  
867  
868  
869  
870  
871  
872  
873  
874  
875  
876  
877  
878  
879  
880  
881  
882  
883  
884  
885  
886  
887  
888  
889  
890  
891  
892  
893  
894  
895  
896  
897  
898  
899  
900  
901  
902  
903  
904  
905  
906  
907  
908  
909  
910  
911  
912  
913  
914  
915  
916  
917  
918  
919  
920  
921  
922  
923  
924  
925  
926  
927  
928  
929  
930  
931  
932  
933  
934  
935  
936  
937  
938  
939  
940  
941  
942  
943  
944  
945  
946  
947  
948  
949  
950  
951  
952  
953  
954  
955  
956  
957  
958  
959  
960  
961  
962  
963  
964  
965  
966  
967  
968  
969  
970  
971  
972  
973  
974  
975  
976  
977  
978  
979  
980  
981  
982  
983  
984  
985  
986  
987  
988  
989  
990  
991  
992  
993  
994  
995  
996  
997  
998  
999  
1000

1 presence of ongoing symptoms.<sup>1 14</sup> However, these recommendations are based on low quality  
2 trials and observational data, often with small numbers of participants and follow-up over a  
3 few weeks.<sup>16</sup> There are no RCTs comparing long-term rate control options in AF.  
4  
5  
6  
7

8 Demonstrating any reduction in hard clinical outcomes with rate control has proved elusive. In  
9 patients with heart failure, reduced ejection fraction and concomitant AF, an individual patient  
10 level meta-analysis of double-blind RCT data has suggested that beta-blockers do not reduce  
11 all-cause mortality or hospital admissions compared to placebo<sup>20</sup>, in contrast to the substantial  
12 benefit seen in sinus rhythm.<sup>44</sup> Similarly, the use of digoxin was not associated with any  
13 increase, or reduction, in mortality in a comprehensive systematic review.<sup>21</sup> This finding  
14 deviates from prior observational analyses which are confounded by the fact that sicker  
15 patients tend to receive digoxin more often, which can only be addressed within a randomised  
16 trial. Although digoxin is known to reduce hospital admissions in patients with heart failure  
17 and reduced ejection fraction in sinus rhythm<sup>45</sup>, the impact in patients with AF is unknown.  
18  
19  
20  
21  
22  
23  
24  
25  
26  
27  
28  
29  
30  
31  
32

33 If rate control has limited effect on mortality, what about evidence for a differential effect on  
34 other outcomes, such as functional capacity, cardiac function or quality of life? Beta-blockers  
35 are the most commonly-used rate control agents and although they have a greater impact than  
36 digoxin on heart rate during exertion, there is no evidence that this results in better exercise  
37 capacity.<sup>17 18 46-48</sup> Beta-blockers were not associated with any improvement in arrhythmia-  
38 related symptoms in a small RCT of 60 low-risk patients with permanent AF, compared to  
39 diltiazem and verapamil which reduced the frequency of symptoms.<sup>49</sup> Those in the beta-  
40 blocker group had a reduction in exercise capacity and increase in B-type natriuretic peptide  
41 (BNP) compared to those treated with CCB.<sup>50</sup> Analysis of smaller trials comparing beta-  
42 blockers with CCB are inconsistent.<sup>17</sup> Compared to verapamil or diltiazem, digoxin has less  
43 effect on heart rate but there is no consistent evidence for any difference in functional  
44 outcomes.<sup>17 18 46 48 51</sup> Importantly, diltiazem and verapamil are usually avoided in patients with  
45  
46  
47  
48  
49  
50  
51  
52  
53  
54  
55  
56  
57  
58  
59  
60

1 reduced ejection fraction due to the risk of adverse outcomes,<sup>52-56</sup> leaving only beta-blockers or  
2 digoxin as suitable therapy. Only a single RCT has been published comparing beta-blockers  
3 with digoxin in patients with AF and heart failure (mean LVEF 24%, n=47).<sup>57</sup> Although there  
4 was a marginally-significant improvement in LVEF with combined carvedilol/digoxin versus  
5 placebo/digoxin, blinded withdrawal of digoxin then led to a deterioration in LVEF,  
6 accompanied by an increase in BNP. The direct effects of digoxin on LVEF and diastolic  
7 function have only been studied in patients with sinus rhythm where digoxin increased LVEF  
8 by 3-11% and improved diastolic filling.<sup>58-60</sup> Magnesium has been shown to complement  
9 digoxin therapy to achieve lower ventricular rates in AF<sup>61</sup>, but is not in common use due to the  
10 availability of beta-blockers and CCB which are more potent agents for acute heart rate  
11 control.<sup>1</sup> Although data on patient-reported quality of life is limited,<sup>62,63</sup> rate control has been  
12 associated with improved quality of life in trials assessing rate versus rhythm control.<sup>64-66</sup> The  
13 mechanism by which rate control therapy mediates an increase in physical functioning and  
14 quality of life is unknown but conceivably due to improvements in LVEF and/or diastolic  
15 function.

16  
17  
18  
19  
20  
21  
22  
23  
24  
25  
26  
27  
28  
29  
30  
31  
32  
33  
34  
35  
36  
37 In summary, rate control is an important part of treatment in all AF patients but the evidence-  
38 base is poor, particularly in those with permanent AF who form the majority of patients in  
39 clinical practice. Rate control in AF is also subject to considerable, and poorly characterised  
40 individual variability in response, with limited information about the effects of therapy on  
41 cardiac function, quality of life and functional capacity.

## 52 **The RATE-AF trial**

53  
54  
55  
56 The RATE-AF trial is the first head-to-head randomised assessment of beta-blockers versus  
57 digoxin as the initial rate control agent in patients with AF. The trial has a prospective,  
58  
59  
60

1  
2  
3  
4  
5  
6  
7  
8  
9  
10  
11  
12  
13  
14  
15  
16  
17  
18  
19  
20  
21  
22  
23  
24  
25  
26  
27  
28  
29  
30  
31  
32  
33  
34  
35  
36  
37  
38  
39  
40  
41  
42  
43  
44  
45  
46  
47  
48  
49  
50  
51  
52  
53  
54  
55  
56  
57  
58  
59  
60

randomised, open-label, investigator-blinded endpoint (PROBE) design, and is planned as an inclusive study that reflects and will have an important impact on clinical practice (see Information for Patients in **Table 1**). The primary outcome is patient-reported quality of life using the SF-36 physical component summary score at 6 months' post-randomisation. The major secondary outcomes are change in LVEF and diastolic function on echocardiography, functional capacity, global and AF-specific quality of life, and cardiovascular biomarkers (see **Table 2**). A key objective of the trial is to improve the methods used for measuring quality of life in AF patients, as well as optimising the validity, reproducibility and acquisition of echocardiographic left-ventricular function. The RATE-AF trial will also act as a feasibility study to plan a future, event-driven clinical trial exploring the impact of different rate control strategies on cardiovascular events and unplanned hospital admissions. The study is sponsored by the University of Birmingham and funded by the National Institute for Health Research (NIHR), as part of a Career Development Fellowship awarded to the Chief Investigator (DK).

## Methods

### Patients

Inclusion criteria are patients aged 60 years or older with breathlessness (New York Heart Association Class II or more) and permanent AF, characterised as a physician decision for rate control with no plans for cardioversion, AAD or ablation therapy. Only limited exclusion criteria apply (**Figure 3**), reflecting any clear requirements or contraindications for either beta-blockers or digoxin. As neither agent impacts on mortality in patients with heart failure<sup>20 21</sup>, reduced LVEF is not an exclusion criterion. All patients are expected to be anticoagulated if appropriate, according to their clinical risk of stroke and thromboembolism.

### **Study procedures and outcomes**

One hundred and sixty eligible patients in need of rate control will be invited to participate in the study from primary and secondary care across two major NHS Trusts in Birmingham, UK. The RATE-AF trial is managed by the Birmingham Clinical Trials Unit (BCTU; University of Birmingham) and situated within the Birmingham NIHR/Wellcome Trust Clinical Research Facility.

Following written informed consent, participants will be randomised in a 1:1 ratio to either bisoprolol or digoxin therapy. Randomisation will be provided by a computer-generated minimisation algorithm to ensure balance between the treatment arms for baseline European Heart Rhythm Association (EHRA) class and gender. Allocation will be concealed until the patient has been recruited and consented, thereafter the trial will be open-label.

Baseline assessment procedures will include patient-reported quality of life questionnaires (**Table 3**), 6-minute walk distance, echocardiography and biomarker assessment. Participants will then receive study medication (bisoprolol 1.25-15 mg once daily or digoxin 62.5-250 µg once daily), with scheduled uptitration visits to attain a heart rate at rest of  $\leq 100$  bpm. This heart rate is in line with international recommendations<sup>1</sup> and was chosen pragmatically to reflect the opinion of many cardiologists that tachycardia can lead to, or worsen, systolic and diastolic dysfunction. Ambulatory 24-hour ECG monitoring will be performed at the end of uptitration (unblinded). Investigator-blinded endpoints will be assessed at the interim (6 month) and final (12 month) visit, which include patient-reported quality of life, echocardiographic parameters of systolic and diastolic left-ventricular function and biomarker assessment (**see Figure 3**).

### **Exploratory work and clinical practice improvement**

During the trial, qualitative research using focus groups and structured interviews will assess whether the quality of life questionnaires adequately and acceptably assess changes in

1 symptom burden in a sample of patients from each treatment arm. We will also compare and  
2  
3 contrast the generic and AF-specific questionnaires. The aim of this work is to improve the  
4  
5 methods used for measuring patient-reported outcomes in AF, and to address some of the  
6  
7 limitations we have identified in published validation studies.<sup>67</sup>  
8  
9

10 Optimal acquisition of echocardiography in patients with AF will be determined by  
11  
12 reproducibility studies, comparing repeated measures of systolic/diastolic function according to  
13  
14 cardiac cycle length. The RATE-AF trial will address the evidence-gaps we have identified in  
15  
16 a systematic review of echocardiography in patients with AF<sup>68</sup>, and explore the diagnostic  
17  
18 difficulty of categorising heart failure in the context of AF (particularly with preserved ejection  
19  
20 fraction, where symptom classification is confounded and BNP levels are consistently raised  
21  
22 due to AF<sup>7</sup>).  
23  
24

25 Blood samples from participants will analysed for the cellular effects of rate control  
26  
27 (intracellular sodium, calcium and cardiotonic steroids) using integrated  
28  
29 fluorescence/contractility photometry in human cardiomyocytes. This work will give  
30  
31 mechanistic insight into the cellular response to beta-blockers and digoxin, and identify novel  
32  
33 markers of treatment effect. Serum will also be stored for the development of new blood-based  
34  
35 and genetic biomarkers that aid in personalisation of rate control therapy.  
36  
37  
38  
39  
40  
41

### 42 **Statistical considerations**

43  
44 The null hypothesis is of no difference in the physical functioning domain of the SF-36 quality  
45  
46 of life questionnaire when comparing a strategy of digoxin versus beta-blocker therapy for  
47  
48 initial rate control in older patients with permanent AF. The alternative hypothesis is  
49  
50 superiority of one over the other therapy as an initial strategy of care. Randomising 144  
51  
52 patients we can assume an 85% power to detect an effect size of half a standard deviation in a  
53  
54 continuous outcome measure of quality of life (two-sided alpha of 0.05). Assuming that 10%  
55  
56 of patients will be lost to follow-up, 160 patients are needed. There is some evidence from  
57  
58  
59  
60

1 existing research to support the notion that the treatment effect could be this large. This  
2  
3 includes a 17% improvement in SF-36 role-physical score in the rate control arm of the RACE  
4  
5 study,<sup>65</sup> a 22% improvement in a proprietary symptom-checklist with CCB (compared to 8%  
6  
7 change in those assigned beta-blockers),<sup>19</sup> and 17% improvement with rate control using SF-36  
8  
9 in the PIAF trial.<sup>66</sup> The RATE-AF trial will also us to explore surrogates for clinical outcomes,  
10  
11 such as LVEF using echocardiography and B-type natriuretic peptide, and provide estimates  
12  
13 for a future definitive trial of rate control in AF, including reliable information on recruitment  
14  
15 rates, study drug titration, cross-over, retention and healthcare costs.  
16  
17  
18  
19  
20  
21

### **Trial oversight, management and registration**

22  
23  
24 RATE-AF will be conducted in accordance with guidelines for Good Clinical Practice (GCP)  
25  
26 and the Declaration of Helsinki, and has regulatory approval from the Medicines and  
27  
28 Healthcare products Regulatory Agency (MHRA).  
29

30  
31 Oversight will be provided by a Trial Steering Committee, comprising an independent Data  
32  
33 Monitoring Committee and members of the RATE-AF Trial Management Group. This  
34  
35 includes representatives of the patient and public involvement panel, involved in both the  
36  
37 design and management of the trial. A Clinical Events Committee will be formed to adjudicate  
38  
39 on adverse events.  
40  
41

42 The RATE-AF trial is registered at clinicaltrials.gov ([NCT02391337](https://clinicaltrials.gov/ct2/show/study/NCT02391337)), ISRCTN ([95259705](https://www.isrctn.com/ISRCTN95259705))  
43  
44 and EudraCT (2015-005043-13). Further information can be obtained from the trial website,  
45  
46 <http://www.birmingham.ac.uk/rate-af>, and the trial protocol (see **Appendix**). The protocol was  
47  
48 developed in accordance with the Standard Protocol Items for Randomized Trials [SPIRIT]  
49  
50 statement<sup>69</sup>, and the latest guidance from the International Society for Quality of Life Research  
51  
52 (ISOQOL) Best Practice taskforce.<sup>70-72</sup>  
53  
54  
55  
56  
57

### **Ethics and Dissemination**

1 The trial has ethical approval from the East Midlands - Derby Research Ethics Committee  
2  
3  
4 (16/EM/0178) and approval from the National Health Service (NHS) Health Research  
5  
6 Authority (IRAS project ID: 191437).  
7

8 The research findings will be submitted for publication to peer-reviewed journals after review  
9  
10 by the oversight committees and the Patient Involvement Panel, and presented to relevant  
11  
12 national and international meetings. Trial participants will be sent a lay summary of the final  
13  
14 results of the trial, written by the Patient Involvement Panel.  
15  
16  
17  
18  
19  
20  
21  
22  
23  
24  
25  
26  
27  
28  
29  
30  
31  
32  
33  
34  
35  
36  
37  
38  
39  
40  
41  
42  
43  
44  
45  
46  
47  
48  
49  
50  
51  
52  
53  
54  
55  
56  
57  
58  
59  
60



## Conclusion

Defining appropriate rate control therapy is vital, particularly in the rapidly growing number of older patients with permanent AF where current evidence is extremely limited. Rate control is an integral part of management in almost all AF patients but hardly any controlled trial evidence exists to guide the choice of agents. This is unacceptable in light of the potential benefits and possible adverse effects of treatment. In addition, the complete lack of data on the impact of medical therapy on symptom burden and heart function necessitate a programme of reproducibility and validity of both patient-reported quality of life and cardiac imaging in AF. The RATE-AF trial will answer key clinical questions about how to initiate therapy in order to improve patient well-being, stratified by relevant patient characteristics such as baseline symptoms, systolic and diastolic cardiac function, and biomarkers of treatment effect.

## Acknowledgements

We would like to acknowledge other members of the wider RATE-AF team, including Karina Bunting, Dannie Fobian, Margaret Grant, Hannah Lack, Susan Jowett, Jonathan Mathers, and Davor Pavlovic (University of Birmingham). We are indebted to the independent members of the trial oversight committees, as well as the Patient and Public Involvement (PPI) Team.

### Competing interests

None of the authors report a conflict of interest. All authors have completed the ICMJE uniform disclosure form ([www.icmje.org/coi\\_disclosure.pdf](http://www.icmje.org/coi_disclosure.pdf)) and declare:

DK reports grants from Menarini, during the conduct of the study; non-financial support from Daiichi Sankyo and personal fees from AtriCure, outside the submitted work. MC reports grants from the National Institute of Health Research, during the conduct of the study; and personal fees from Astella Pharma and Ferring Pharma, outside the submitted work. PK reports consulting fees and honoraria from Bayer Healthcare, Boehringer Ingelheim, Bristol-Myers Squibb, Daiichi-Sankyo, Medtronic, Pfizer and Servier, all outside the submitted work; research grants from Bristol-Myers Squibb, Pfizer, Cardiovascular Therapeutics, Daiichi Sankyo, Sanofi, St. Jude Medical, German Federal Ministry for Education and Research (BMBF), Fondation Leducq, German Research Foundation (DFG), European Union, British Heart Foundation and Medical Research Council UK, all outside the submitted work; and is listed on two patent applications on AF therapy and markers for AF, both outside the submitted work. GYHL has served as a consultant for Bayer, Astellas, Merck, AstraZeneca, Sanofi, BMS/Pfizer, Biotronik, Portola and Boehringer Ingelheim, and has been on the speaker's bureau for Bayer, BMS/Pfizer, Boehringer Ingelheim, and Sanofi-Aventis. RPS is the President of the British Society of Echocardiography. JJD, MG, MS, JNT, SM, GS report no competing interests.

### **Authors' contributions**

The manuscript was drafted by DK who is the Chief Investigator for the RATE-AF trial. MG and GYHL are Principal Investigators. MC, PK, RPS and JNT are members of the Trial Management Group. JJD, SM and GS are representatives from the Clinical Trials Unit. MS is the Lead for the Patient Involvement Panel, and a member of the Steering Committee. All authors contributed to the writing of the RATE-AF protocol or patient information, and edited this manuscript for intellectual content.

### **Funding**

DK and the RATE-AF trial are supported by the National Institute of Health Research (NIHR) as part of a Career Development Fellowship (CDF-2015-08-074). The opinions expressed in this paper are those of the authors and do not represent the NIHR or the UK Department of Health.

### **Data Sharing Statement**

No additional data available at this time.

## References

1. Kirchhof P, Benussi S, Kotecha D, et al. 2016 ESC Guidelines for the management of atrial fibrillation developed in collaboration with EACTS. *Eur Heart J* 2016;37:2893-962.
2. Chugh SS, Havmoeller R, Narayanan K, et al. Worldwide epidemiology of atrial fibrillation: a Global Burden of Disease 2010 Study. *Circulation* 2014;129:837-47.
3. Krijthe BP, Kunst A, Benjamin EJ, et al. Projections on the number of individuals with atrial fibrillation in the European Union, from 2000 to 2060. *Eur Heart J* 2013;34:2746-51.
4. Lane DA, Skøjth F, Larsen TB, Lip GYH, Kotecha D. Temporal trends in atrial fibrillation incidence, comorbidity and mortality: comprehensive linked data from primary care. *J Am Heart Assoc* 2017: in press.
5. Chiang CE, Naditch-Brule L, Murin J, et al. Distribution and risk profile of paroxysmal, persistent, and permanent atrial fibrillation in routine clinical practice: insight from the real-life global survey evaluating patients with atrial fibrillation international registry. *Circ Arrhythm Electrophysiol* 2012;5:632-9.
6. Kotecha D, Piccini JP. Atrial fibrillation in heart failure: what should we do? *Eur Heart J* 2015;36:3250-7.
7. Kotecha D, Lam CS, Van Veldhuisen DJ, Van Gelder IC, Voors AA, Rienstra M. Heart Failure With Preserved Ejection Fraction and Atrial Fibrillation: Vicious Twins. *J Am Coll Cardiol* 2016;68:2217-28.
8. Kotecha D, Banerjee A, Lip GY. Increased stroke risk in atrial fibrillation patients with heart failure: does ejection fraction matter? *Stroke* 2015;46:608-9.
9. Christiansen CB, Olesen JB, Gislason G, Lock-Hansen M, Torp-Pedersen C. Cardiovascular and non-cardiovascular hospital admissions associated with atrial fibrillation: a Danish nationwide, retrospective cohort study. *BMJ Open* 2013;3.
10. Ambrosy AP, Fonarow GC, Butler J, et al. The global health and economic burden of hospitalizations for heart failure: lessons learned from hospitalized heart failure registries. *J Am Coll Cardiol* 2014;63:1123-33.
11. Kotecha D, Chudasama R, Lane DA, Kirchhof P, Lip GY. Atrial fibrillation and heart

- 1 failure due to reduced versus preserved ejection fraction: A systematic review and  
2 meta-analysis of death and adverse outcomes. *Int J Cardiol* 2016;203:660-6.  
3  
4  
5  
6 12. Kirchhof P, Breithardt G, Bax J, et al. A roadmap to improve the quality of atrial  
7 fibrillation management: proceedings from the fifth Atrial Fibrillation  
8 Network/European Heart Rhythm Association consensus conference. *Europace*  
9 2016;18:37-50.  
10  
11  
12  
13 13. National Institute for Health and Care Excellence. Atrial fibrillation: the management of  
14 atrial fibrillation. *NICE clinical guideline 180* 2014; Accessed 15/09/2016;  
15 <http://www.nice.org.uk/guidance/cg180/>.  
16  
17  
18  
19 14. January CT, Wann LS, Alpert JS, et al. 2014 AHA/ACC/HRS guideline for the  
20 management of patients with atrial fibrillation: executive summary: a report of the  
21 American College of Cardiology/American Heart Association Task Force on practice  
22 guidelines and the Heart Rhythm Society. *Circulation* 2014;130:2071-104.  
23  
24  
25  
26  
27 15. Kotecha D, Kirchhof P. Rate and rhythm control have comparable effects on mortality and  
28 stroke in atrial fibrillation but better data are needed. *Evid Based Med* 2014;19:222-3.  
29  
30  
31  
32 16. Segal JB, McNamara RL, Miller MR, et al. The evidence regarding the drugs used for  
33 ventricular rate control. *J Fam Practice*, 2000;47-59.  
34  
35  
36 17. Nikolaidou T, Channer KS. Chronic atrial fibrillation: a systematic review of medical heart  
37 rate control management. *Postgrad Med J* 2009;85:303-12.  
38  
39  
40 18. Farshi R, Kistner D, Sarma JSM, Longmate JA, Singh BN. Ventricular rate control in  
41 chronic atrial fibrillation during daily activity and programmed exercise: a crossover  
42 open-label study of five drug regimens. *J Am Coll Cardiol* 1999;33:304-10.  
43  
44  
45  
46 19. Ulimoen SR, Enger S, Carlson J, et al. Comparison of four single-drug regimens on  
47 ventricular rate and arrhythmia-related symptoms in patients with permanent atrial  
48 fibrillation. *Am J Cardiol* 2013;111:225-30.  
49  
50  
51  
52 20. Kotecha D, Holmes J, Krum H, et al. Efficacy of beta blockers in patients with heart failure  
53 plus atrial fibrillation: an individual-patient data meta-analysis. *Lancet* 2014;384:2235-  
54 43.  
55  
56  
57  
58 21. Ziff OJ, Lane DA, Samra M, et al. Safety and efficacy of digoxin: systematic review and  
59  
60

- 1 meta-analysis of observational and controlled trial data. *BMJ* 2015;351:h4451.
- 2
- 3
- 4 22. Wyse DG, Waldo AL, DiMarco JP, et al. A comparison of rate control and rhythm control
- 5 in patients with atrial fibrillation. *N Engl J Med* 2002;347:1825-33.
- 6
- 7
- 8 23. Van Gelder IC, Hagens VE, Bosker HA, et al. A Comparison of Rate Control and Rhythm
- 9 Control in Patients with Recurrent Persistent Atrial Fibrillation. *N Engl J Med*
- 10 2002;347:1834-40.
- 11
- 12
- 13 24. de Denus S, Sanoski CA, Carlsson J, Opolski G, Spinler SA. Rate vs rhythm control in
- 14 patients with atrial fibrillation: a meta-analysis. *Arch Intern Med* 2005;165:258-62.
- 15
- 16
- 17 25. Chatterjee S, Sardar P, Lichstein E, Mukherjee D, Aikat S. Pharmacologic rate versus
- 18 rhythm-control strategies in atrial fibrillation: an updated comprehensive review and
- 19 meta-analysis. *PACE* 2013;36:122-33.
- 20
- 21
- 22 26. Al-Khatib SM, Allen LaPointe NM, Chatterjee R, et al. Rate- and rhythm-control therapies
- 23 in patients with atrial fibrillation: a systematic review. *Ann Intern Med* 2014;160:760-
- 24 73.
- 25
- 26
- 27 27. Roy D, Talajic M, Nattel S, et al. Rhythm Control versus Rate Control for Atrial
- 28 Fibrillation and Heart Failure. *N Engl J Med* 2008;358:2667-77.
- 29
- 30
- 31 28. Kong MH, Shaw LK, O'Connor C, Califf RM, Blazing MA, Al-Khatib SM. Is rhythm-
- 32 control superior to rate-control in patients with atrial fibrillation and diastolic heart
- 33 failure? *Ann Noninvasive Electrocardiol* 2010;15:209-17.
- 34
- 35
- 36 29. Corley SD, Epstein AE, DiMarco JP, et al. Relationships between sinus rhythm, treatment,
- 37 and survival in the Atrial Fibrillation Follow-Up Investigation of Rhythm Management
- 38 (AFFIRM) Study. *Circulation* 2004;109:1509-13.
- 39
- 40
- 41 30. Wazni O, Wilkoff B, Saliba W. Catheter Ablation for Atrial Fibrillation. *N Engl J Med*
- 42 2011;365:2296-304.
- 43
- 44
- 45 31. Jones DG, Haldar SK, Hussain W, et al. A randomized trial to assess catheter ablation
- 46 versus rate control in the management of persistent atrial fibrillation in heart failure. *J*
- 47 *Am Coll Cardiol* 2013;61:1894-903.
- 48
- 49
- 50
- 51 32. Kirchhof P, Ammentorp B, Darius H, et al. Management of atrial fibrillation in seven
- 52 European countries after the publication of the 2010 ESC Guidelines on atrial
- 53
- 54
- 55
- 56
- 57
- 58
- 59
- 60

- 1  
2 fibrillation: primary results of the PREvention of thromboembolic events--European  
3 Registry in Atrial Fibrillation (PREFER in AF). *Europace* 2014;16:6-14.  
4  
5  
6 33. Senoo K, Lip GY, Lane DA, Buller HR, Kotecha D. Residual risk of stroke and death in  
7 anticoagulated patients according to the type of atrial fibrillation: AMADEUS Trial.  
8 *Stroke* 2015;46:2523-8.  
9  
10  
11 34. Van Gelder IC, Groenveld HF, Crijns HJGM, et al. Lenient versus Strict Rate Control in  
12 Patients with Atrial Fibrillation. *N Engl J Med* 2010;362:1363-73.  
13  
14  
15 35. Groenveld HF, Crijns HJGM, Van den Berg MP, et al. The Effect of Rate Control on  
16 Quality of Life in Patients With Permanent Atrial Fibrillation: Data From the RACE II  
17 (Rate Control Efficacy in Permanent Atrial Fibrillation II) Study. *J Am Coll Cardiol*  
18 2011;58:1795-803.  
19  
20  
21  
22 36. Groenveld HF, Tijssen JG, Crijns HJ, et al. Rate control efficacy in permanent atrial  
23 fibrillation: successful and failed strict rate control against a background of lenient rate  
24 control: data from RACE II (Rate Control Efficacy in Permanent Atrial Fibrillation). *J*  
25 *Am Coll Cardiol* 2013;61:741-8.  
26  
27  
28  
29 37. Van Gelder IC, Wyse DG, Chandler ML, et al. Does intensity of rate-control influence  
30 outcome in atrial fibrillation? An analysis of pooled data from the RACE and AFFIRM  
31 studies. *Europace* 2006;8:935-42.  
32  
33  
34  
35 38. Cooper HA, Bloomfield DA, Bush DE, et al. Relation between achieved heart rate and  
36 outcomes in patients with atrial fibrillation (from the Atrial Fibrillation Follow-up  
37 Investigation of Rhythm Management [AFFIRM] Study). *Am J Cardiol* 2004;93:1247-  
38 53.  
39  
40  
41  
42 39. Groenveld HF, Crijns HJ, Rienstra M, et al. Does intensity of rate control influence  
43 outcome in persistent atrial fibrillation? Data of the RACE study. *Am Heart J*  
44 2009;158:785-91.  
45  
46  
47  
48 40. Cullington D, Goode KM, Zhang J, Cleland JG, Clark AL. Is heart rate important for  
49 patients with heart failure in atrial fibrillation? *JACC Heart Fail* 2014;2:213-20.  
50  
51  
52  
53 41. Steg PG, Alam S, Chiang C-E, et al. Symptoms, functional status and quality of life in  
54 patients with controlled and uncontrolled atrial fibrillation: data from the RealiseAF  
55 cross-sectional international registry. *Heart* 2012;98:195-201.  
56  
57  
58  
59  
60

- 1  
2  
3  
4  
5  
6  
7  
8  
9  
10  
11  
12  
13  
14  
15  
16  
17  
18  
19  
20  
21  
22  
23  
24  
25  
26  
27  
28  
29  
30  
31  
32  
33  
34  
35  
36  
37  
38  
39  
40  
41  
42  
43  
44  
45  
46  
47  
48  
49  
50  
51  
52  
53  
54  
55  
56  
57  
58  
59  
60
42. Nabauer M, Gerth A, Limbourg T, et al. The Registry of the German Competence NETwork on Atrial Fibrillation: patient characteristics and initial management. *Europace* 2009;11:423-34.
  43. Lip GY, Laroche C, Dan GA, et al. A prospective survey in European Society of Cardiology member countries of atrial fibrillation management: baseline results of EURObservational Research Programme Atrial Fibrillation (EORP-AF) Pilot General Registry. *Europace* 2014;16:308-19.
  44. Kotecha D, Manzano L, Krum H, et al. Effect of age and sex on efficacy and tolerability of beta blockers in patients with heart failure with reduced ejection fraction: individual patient data meta-analysis. *BMJ* 2016;353:i1855.
  45. The Digitalis Investigation Group. The effect of digoxin on mortality and morbidity in patients with heart failure. *N Engl J Med* 1997;336:525-33.
  46. Koh KK, Kwon KS, Park HB, et al. Efficacy and safety of digoxin alone and in combination with low-dose diltiazem or betaxolol to control ventricular rate in chronic atrial fibrillation. *Am J Cardiol* 1995;75:88-90.
  47. Lewis RV, McMurray J, McDevitt DG. Effects of atenolol, verapamil, and xamoterol on heart rate and exercise tolerance in digitalised patients with chronic atrial fibrillation. *J Cardiovasc Pharmacol* 1989;13:1-6.
  48. Tsuneda T, Yamashita T, Fukunami M, et al. Rate control and quality of life in patients with permanent atrial fibrillation: the Quality of Life and Atrial Fibrillation (QOLAF) Study. *Circ J* 2006;70:965-70.
  49. Ulimoen SR, Enger S, Carlson J, et al. Comparison of four single-drug regimens on ventricular rate and arrhythmia-related symptoms in patients with permanent atrial fibrillation. *Am J Cardiol* 2013;111:225-30.
  50. Ulimoen SR, Enger S, Pripp AH, et al. Calcium channel blockers improve exercise capacity and reduce N-terminal Pro-B-type natriuretic peptide levels compared with beta-blockers in patients with permanent atrial fibrillation. *Eur Heart J* 2014;35:517-24.
  51. Lewis RV, Irvine N, McDevitt DG. Relationships between heart rate, exercise tolerance and cardiac output in atrial fibrillation: the effects of treatment with digoxin, verapamil



- 1  
2 and diltiazem. *Eur Heart J* 1988;9:777-81.  
3  
4  
5 52. McMurray JJ, Adamopoulos S, Anker SD, et al. ESC Guidelines for the diagnosis and  
6 treatment of acute and chronic heart failure 2012: The Task Force for the Diagnosis and  
7 Treatment of Acute and Chronic Heart Failure 2012 of the European Society of  
8 Cardiology. Developed in collaboration with the Heart Failure Association (HFA) of  
9 the ESC. *Eur Heart J* 2012;33:1787-847.  
10  
11  
12  
13 53. Elkayam U. Calcium channel blockers in heart failure. *Cardiology* 1998;89 Suppl 1:38-46.  
14  
15  
16 54. The effect of diltiazem on mortality and reinfarction after myocardial infarction. The  
17 Multicenter Diltiazem Postinfarction Trial Research Group. *N Engl J Med*  
18 1988;319:385-92.  
19  
20  
21  
22 55. Goldstein RE, Boccuzzi SJ, Cruess D, Nattel S. Diltiazem increases late-onset congestive  
23 heart failure in postinfarction patients with early reduction in ejection fraction.  
24 *Circulation* 1991;83:52-60.  
25  
26  
27  
28 56. The Danish Study Group on Verapamil in Myocardial Infarction. Secondary prevention  
29 with verapamil after myocardial infarction. *Am J Cardiol* 1990;66:33-40.  
30  
31  
32 57. Khand AU, Rankin AC, Martin W, Taylor J, Gemmell I, Cleland JG. Carvedilol alone or in  
33 combination with digoxin for the management of atrial fibrillation in patients with heart  
34 failure? *J Am Coll Cardiol* 2003;42:1944-51.  
35  
36  
37  
38 58. Partanen J, Heikkila J, Pellinen T, Nieminen MS. Effect of digoxin on the heart in normal  
39 subjects: influence of isometric exercise and autonomic blockade: a noninvasive study.  
40 *Br J Clin Pharmacol* 1988;25:331-40.  
41  
42  
43  
44 59. Dernellis JM, Panaretou MP. Effects of digoxin on left atrial function in heart failure.  
45 *Heart* 2003;89:1308-15.  
46  
47  
48  
49 60. Giunta A, Maione S, Arnese MR, et al. Effects of intravenous digoxin on pulmonary  
50 venous and transmitral flows in patients with chronic heart failure of different degrees.  
51 *Clin Cardiol* 1995;18:27-33.  
52  
53  
54  
55 61. Kotecha D. Magnesium for Atrial Fibrillation, Myth or Magic? *Circ Arrhythm*  
56 *Electrophysiol* 2016;9.  
57  
58  
59 62. Thrall G, Lane D, Carroll D, Lip GYH. Quality of Life in Patients with Atrial Fibrillation:  
60

- 1  
2 A Systematic Review. *Am J Med* 2006;119:448.e1-19.  
3  
4  
5 63. Rienstra M, Lubitz SA, Mahida S, et al. Symptoms and Functional Status of Patients With  
6 Atrial Fibrillation: State of the Art and Future Research Opportunities. *Circulation*  
7 2012;125:2933-43.  
8  
9  
10 64. Pepine CJ. Effects of pharmacologic therapy on health-related quality of life in elderly  
11 patients with atrial fibrillation: a systematic review of randomized and nonrandomized  
12 trials. *Clin Med Insights Cardiol* 2013;7:1-20.  
13  
14  
15 65. Hagens VE, Ranchor AV, Van Sonderen E, et al. Effect of rate or rhythm control on quality  
16 of life in persistent atrial fibrillation: Results from the Rate Control Versus Electrical  
17 Cardioversion (RACE) study. *J Am Coll Cardiol* 2004;43:241-47.  
18  
19  
20 66. Grönefeld GC, Lilienthal J, Kuck K-H, Hohnloser SH. Impact of rate versus rhythm control  
21 on quality of life in patients with persistent atrial fibrillation: Results from a prospective  
22 randomized study. *Eur Heart J* 2003;24:1430-36.  
23  
24  
25 67. Kotecha D, Ahmed A, Calvert M, Lencioni M, Terwee CB, Lane DA. Patient-Reported  
26 Outcomes for Quality of Life Assessment in Atrial Fibrillation: A Systematic Review  
27 of Measurement Properties. *PLoS ONE* 2016;11:e0165790.  
28  
29  
30 68. Kotecha D, Mohamed M, Shantsila E, Popescu BA, Steeds RP. Is echocardiography valid  
31 and reproducible in patients with atrial fibrillation? A systematic review. *Europace*  
32 2017: *in press*.  
33  
34  
35 69. Chan AW, Tetzlaff JM, Gotzsche PC, et al. SPIRIT 2013 explanation and elaboration:  
36 guidance for protocols of clinical trials. *BMJ* 2013;346:e7586.  
37  
38  
39 70. Calvert M, Kyte D, von Hildebrand M, King M, Moher D. Putting patients at the heart of  
40 health-care research. *Lancet* 2015;385:1073-74.  
41  
42  
43 71. Calvert M, Kyte D, Duffy H, et al. Patient-reported outcome (PRO) assessment in clinical  
44 trials: a systematic review of guidance for trial protocol writers. *PLoS One*  
45 2014;9:e110216.  
46  
47  
48 72. Kyte D, Duffy H, Fletcher B, et al. Systematic evaluation of the patient-reported outcome  
49 (PRO) content of clinical trial protocols. *PLoS One* 2014;9:e110229.  
50  
51  
52 73. Ware JE, Gandek B. Overview of the SF-36 Health Survey and the International Quality of  
53  
54  
55  
56  
57  
58  
59  
60

- 1 Life Assessment (IQOLA) Project. *J Clin Epidemiol* 1998;51:903-12.
- 2
- 3
- 4 74. Gandek B, Sinclair SJ, Kosinski M, Ware JE, Jr. Psychometric evaluation of the SF-36
- 5 health survey in Medicare managed care. *Health Care Financ Rev* 2004;25:5-25.
- 6
- 7
- 8 75. Herdman M, Gudex C, Lloyd A, et al. Development and preliminary testing of the new
- 9 five-level version of EQ-5D (EQ-5D-5L). *Qual Life Res* 2011;20:1727-36.
- 10
- 11
- 12 76. Devlin NJ, Krabbe PF. The development of new research methods for the valuation of EQ-
- 13 5D-5L. *Eur J Health Econ* 2013;14 Suppl 1:S1-3.
- 14
- 15
- 16
- 17 77. Janssen MF, Pickard AS, Golicki D, et al. Measurement properties of the EQ-5D-5L
- 18 compared to the EQ-5D-3L across eight patient groups: a multi-country study. *Qual*
- 19 *Life Res* 2013;22:1717-27.
- 20
- 21
- 22
- 23 78. Spertus J, Dorian P, Bubien R, et al. Development and validation of the Atrial Fibrillation
- 24 Effect on QualiTy-of-Life (AFEQT) Questionnaire in patients with atrial fibrillation.
- 25 *Circ Arrhythm Electrophysiol* 2011;4:15-25.
- 26
- 27
- 28
- 29 79. Dorian P, Burk C, Mullin CM, et al. Interpreting changes in quality of life in atrial
- 30 fibrillation: How much change is meaningful? *Am Heart J* 2013;166:381-87.e8.
- 31
- 32
- 33 80. Wynn GJ, Todd DM, Webber M, et al. The European Heart Rhythm Association symptom
- 34 classification for atrial fibrillation: validation and improvement through a simple
- 35 modification. *Europace* 2014;16:965-72.
- 36
- 37
- 38
- 39 81. Carlsson J, Miketic S, Windeler J, et al. Randomized trial of rate-control versus rhythm-
- 40 control in persistent atrial fibrillation: the Strategies of Treatment of Atrial Fibrillation
- 41 (STAF) study. *J Am Coll Cardiol* 2003;41:1690-6.
- 42
- 43
- 44
- 45 82. Hohnloser SH, Kuck KH, Lilienthal J. Rhythm or rate control in atrial fibrillation--
- 46 Pharmacological Intervention in Atrial Fibrillation (PIAF): a randomised trial. *Lancet*
- 47 2000;356:1789-94.
- 48
- 49
- 50
- 51 83. Opolski G, Torbicki A, Kosior DA, et al. Rate control vs rhythm control in patients with
- 52 nonvalvular persistent atrial fibrillation: the results of the Polish How to Treat Chronic
- 53 Atrial Fibrillation (HOT CAFE) Study. *Chest* 2004;126:476-86.
- 54
- 55
- 56
- 57 84. Vora A, Karnad D, Goyal V, et al. Control of heart rate versus rhythm in rheumatic atrial
- 58 fibrillation: a randomized study. *J Cardiovasc Pharmacol Ther* 2004;9:65-73.
- 59
- 60

Table 1: The RATE-AF trial – Information for Patients

|                                                                                                                                                                                                                                                                                                                                                                                                                                                                                                                                                                                  |
|----------------------------------------------------------------------------------------------------------------------------------------------------------------------------------------------------------------------------------------------------------------------------------------------------------------------------------------------------------------------------------------------------------------------------------------------------------------------------------------------------------------------------------------------------------------------------------|
| <b>About atrial fibrillation</b>                                                                                                                                                                                                                                                                                                                                                                                                                                                                                                                                                 |
| Atrial fibrillation is a common heart condition that leads to an irregular and often rapid heart rate. Atrial fibrillation causes 1 in 4 strokes, and patients have frequent hospital admissions and a higher risk of dying. In addition, atrial fibrillation makes many patients feel unwell, with reduced quality of life.                                                                                                                                                                                                                                                     |
| <b>What is the purpose of the trial?</b>                                                                                                                                                                                                                                                                                                                                                                                                                                                                                                                                         |
| Atrial fibrillation usually requires medication to control heart rate, but we currently don't know which medication is better for patients. The aim of this study is to find out which of two treatments improves quality of life and the function of the heart, digoxin or bisoprolol (a beta-blocker).                                                                                                                                                                                                                                                                         |
| <b>What will happen in the trial?</b>                                                                                                                                                                                                                                                                                                                                                                                                                                                                                                                                            |
| The RATE-AF trial is designed to compare two approaches for control of heart rate, based on initial treatment with either digoxin or beta-blockers, medications which are commonly used by doctors. The main objective of the trial is to research the effects of treatment on quality of life in patients with atrial fibrillation. We will also test whether quality of life questionnaires respond to changes in symptoms experienced by patients, how we use ultrasound to look at the function of the heart, and develop new markers in the blood to personalise treatment. |
| <b>More information</b>                                                                                                                                                                                                                                                                                                                                                                                                                                                                                                                                                          |
| RATE-AF trial video: <a href="https://www.youtube.com/watch?v=4oxe8AcVo0E">https://www.youtube.com/watch?v=4oxe8AcVo0E</a> or search 'rateaf' in YouTube.                                                                                                                                                                                                                                                                                                                                                                                                                        |
| Patient information (British Heart Foundation): <a href="https://www.bhf.org.uk/heart-health/conditions/atrial-fibrillation">https://www.bhf.org.uk/heart-health/conditions/atrial-fibrillation</a> .                                                                                                                                                                                                                                                                                                                                                                            |

Table 2: Outcomes and objectives of the RATE-AF trial

|                                                                                                                                                                                                                                                          |
|----------------------------------------------------------------------------------------------------------------------------------------------------------------------------------------------------------------------------------------------------------|
| <b>Primary outcome:</b>                                                                                                                                                                                                                                  |
| Comparison of two strategies for rate control on patient-reported quality of life, based on initial use of digoxin versus beta-blocker therapy, with a predefined focus on physical well-being using the SF-36 physical component summary at six months. |
| <b>Secondary outcomes:</b>                                                                                                                                                                                                                               |
| Patient-reported quality of life at six and twelve months, including SF-36 global and domain-specific scores, EQ-5D-5L summary index and visual analogue scale, and AFEQT overall score.                                                                 |
| Echocardiographic left-ventricular function at 12 months, including LVEF and diastolic function (E/e' and composite of diastolic indices).                                                                                                               |
| Functional assessment at 6 and 12 months, including six-minute walking distance and change in EHRA class.                                                                                                                                                |
| Change in BNP levels at 6 months.                                                                                                                                                                                                                        |
| Change in heart rate from baseline and group comparison using 24-hour ambulatory ECG at end of uptitration.                                                                                                                                              |
| <b>Feasibility assessment:</b>                                                                                                                                                                                                                           |
| Successful methods for recruitment across primary and secondary care.                                                                                                                                                                                    |
| Key issues that affect retention of participants, such as convenience, compliance and cross-over.                                                                                                                                                        |
| Drug discontinuation rate and adverse reactions leading to drug discontinuation.                                                                                                                                                                         |
| Therapy-induced requirement for additional treatment (e.g. pacemaker implantation).                                                                                                                                                                      |
| Population-specific standard deviations and proportions to enable sample size calculation for a future trial.                                                                                                                                            |
| Assessment of unplanned hospital admissions and cardiovascular outcomes.                                                                                                                                                                                 |
| <b>Exploratory objectives:</b>                                                                                                                                                                                                                           |
| Assessment of the validity and reproducibility of echocardiographic measures in patients with AF.                                                                                                                                                        |
| Correlation of baseline measures, including quality of life questionnaires and unblinded baseline investigations such as quality of life, BNP, LVEF, E/e', EHRA class, intracellular biomarkers and heart rate.                                          |
| Impact of therapy on intracellular sodium and calcium concentration and cardiotoxic steroid levels as biomarkers of cellular response.                                                                                                                   |
| Impact of combination therapy on outcomes.                                                                                                                                                                                                               |
| Change in cognitive function at twelve months.                                                                                                                                                                                                           |
| Qualitative research of patient-reported quality of life using focus groups to explore patient acceptability, optimal delivery methods and responsiveness.                                                                                               |
| Correlation of serum digoxin concentration with change in quality of life and intracellular methods.                                                                                                                                                     |
| Cost-consequence economic analysis from an NHS healthcare perspective.                                                                                                                                                                                   |

AF, Atrial Fibrillation; AFEQT, Atrial Fibrillation Effect on QualiTy-of-life questionnaire; BNP, B-type natriuretic peptide; ECG, electrocardiogram; EHRA, European Heart Rhythm Association functional class; EQ-5D-5L, EuroQol five dimensions five level questionnaire; LVEF, left ventricular ejection fraction; NHS, National Health Service; SF-36, Short Form (36) Health Survey.

Table 3: Patient-reported quality of life questionnaires used in RATE-AF

| Questionnaire                                                                               | Details                                                                                                                                                                                                                                                                                                                                                                                                                                                                                                                       | Advantages and disadvantages                                                                                                                                                                                                                                                                                                               |
|---------------------------------------------------------------------------------------------|-------------------------------------------------------------------------------------------------------------------------------------------------------------------------------------------------------------------------------------------------------------------------------------------------------------------------------------------------------------------------------------------------------------------------------------------------------------------------------------------------------------------------------|--------------------------------------------------------------------------------------------------------------------------------------------------------------------------------------------------------------------------------------------------------------------------------------------------------------------------------------------|
| SF-36<br>Short Form (36)<br>Health Survey <sup>73</sup>                                     | <p>Generic instrument with 4-week recall period in eight domains (vitality, physical functioning, bodily pain, general health perceptions, physical role functioning, emotional role functioning, social role functioning and mental health).</p> <p>11 subdivided questions, each recorded with a Likert scale.</p> <p>Scoring: Each response is given a numerical value (0 to 100, with 100 representing the best level of functioning possible), which are averaged across each domain.</p>                                | <p>Extensively validated across a wide variety of conditions and the elderly.<sup>74</sup></p> <p>Not specific to AF and hence other comorbidities may dominate responses.</p> <p>Requires a license fee.</p>                                                                                                                              |
| EQ-5D-5L<br>EuroQol five<br>dimensions five<br>level<br>questionnaire <sup>75 76</sup>      | <p>Generic instrument about today's health with a five-answer scale in five domains (mobility, self-care, usual activities, pain/discomfort and anxiety/depression).</p> <p>Scoring: Each question is scored (1 to 5, with 1 representing the best health). The overall profile can be indexed to country specific value sets giving a continuous value.</p> <p>Also includes a visual analogue scale denoting current health perception (0 to 100 scale, with 100 representing the best health the patient can imagine).</p> | <p>Simple questionnaire that is quick to complete and includes a visual scale.</p> <p>Extensive utilisation, particularly for health economic assessment, with improvement discrimination over prior versions.<sup>77</sup></p> <p>Not specific to AF and hence other comorbidities may dominate responses.</p>                            |
| AFEQT<br>Atrial Fibrillation<br>Effect on<br>Quality-of-life<br>questionnaire <sup>78</sup> | <p>AF-specific quality of life instrument with 4-week recall period in domains relating to symptoms, daily activities and treatment.</p> <p>20 questions (18 on health-related quality and life and 2 on treatment satisfaction), each recorded with a 7-point Likert scale.</p> <p>Scoring: Responses to the 18 questions are summed and converted to a continuous score (0 to 100, with 100 corresponding to no patient concerns nor disability due to AF). Component domains are scored in a similar way.</p>              | <p>Specific to the impact of AF on quality of life.</p> <p>Better than other AF-specific tools in a systematic review of methodological/psychometric assessment.<sup>67</sup></p> <p>Limited validation as yet in comparison to generic tools<sup>79 80</sup>, particularly for clinical responsiveness.</p> <p>License fee may apply.</p> |

## Figure legends

### Figure 1: Evidenced-based summary for management of AF

Summary of evidence for main components of clinical management, highlighting paucity of robust data for key issues regarding rate control therapy. RCT, randomised controlled trial; LV, left-ventricular; NOAC, novel oral anticoagulants.

### Figure 2: Hospitalisation in rate versus rhythm control trials

Meta-analysis of hospitalisation in the six largest rate versus rhythm control trials, excluding hospital visits for cardioversion procedures, where applicable. Studies are pooled with a random-effects model. Significant heterogeneity was identified, with an  $I^2$  value of 66.8% ( $p=0.01$ ). Grey boxes represent the comparative weight of the study.

STAF, Strategies of Treatment of Atrial Fibrillation study (cardioversion/AAD versus rate control in persistent AF)<sup>81</sup>; PIAF, Pharmacological Intervention in Atrial Fibrillation trial (amiodarone/cardioversion versus diltiazem in persistent AF)<sup>82</sup>; HOT CAFE, How to Treat Chronic Atrial Fibrillation study (cardioversion/AAD versus rate control in persistent AF)<sup>83</sup>; AF-CHF, Atrial Fibrillation and Congestive Heart Failure trial (cardioversion/AAD versus rate control in paroxysmal/persistent AF with LVEF  $\leq 35\%$ )<sup>27</sup>; CRAAFT, Control of Rate versus Rhythm in rheumatic Atrial Fibrillation Trial (cardioversion/amiodarone versus diltiazem in persistent AF due to rheumatic heart disease)<sup>84</sup>; AFFIRM, Atrial Fibrillation Follow-up Investigation of Rhythm Management study (AAD/cardioversion versus rate control in paroxysmal/persistent AF).<sup>22</sup>

### Figure 3: RATE-AF trial schema

Trial flowchart, including major endpoints and inclusion/exclusion criteria.

1  
2  
3  
4 **Appendix: RATE-AF trial protocol**  
5  
6  
7  
8  
9

10 Please see attached file.  
11  
12  
13  
14  
15  
16  
17  
18  
19  
20  
21  
22  
23  
24  
25  
26  
27  
28  
29  
30  
31  
32  
33  
34  
35  
36  
37  
38  
39  
40  
41  
42  
43  
44  
45  
46  
47  
48  
49  
50  
51  
52  
53  
54  
55  
56  
57  
58  
59  
60

For peer review only



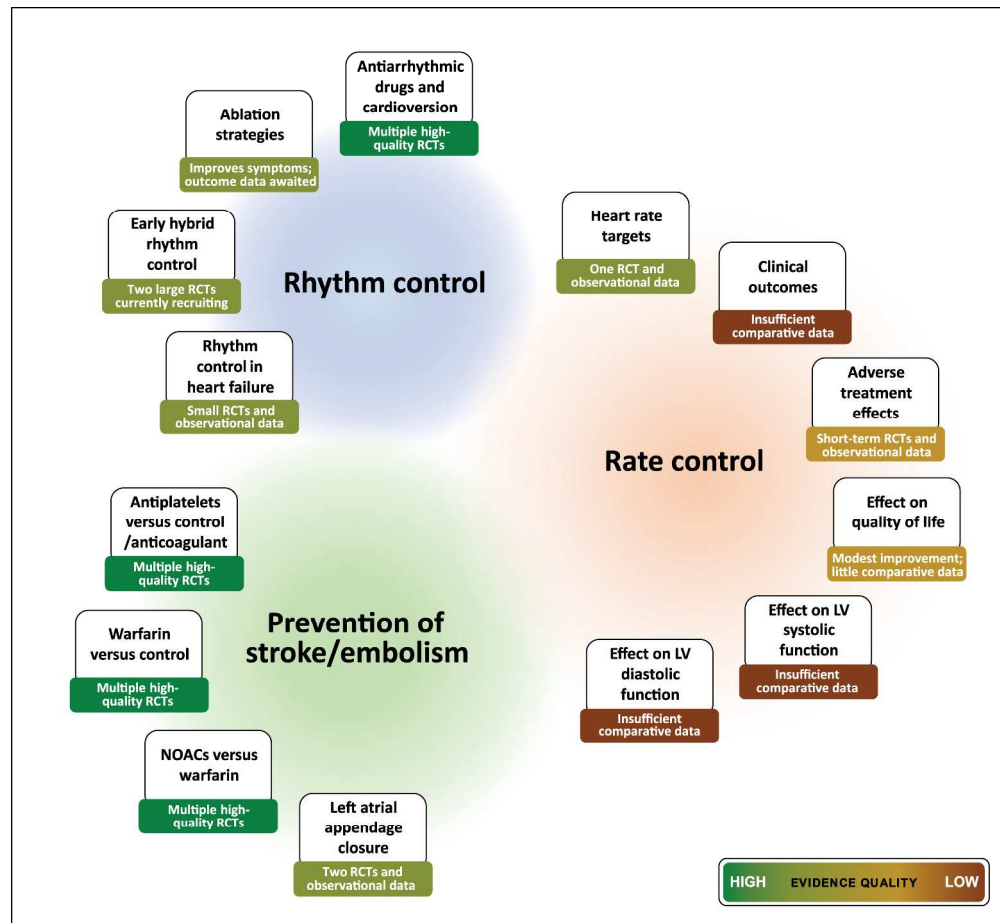

Figure 1: Evidenced-based summary for management of AF  
 Summary of evidence for main components of clinical management, highlighting paucity of robust data for key issues regarding rate control therapy. RCT, randomised controlled trial; LV, left-ventricular; NOAC, novel oral anticoagulants.

291x267mm (300 x 300 DPI)

Hospitalisation: Rate versus rhythm-control

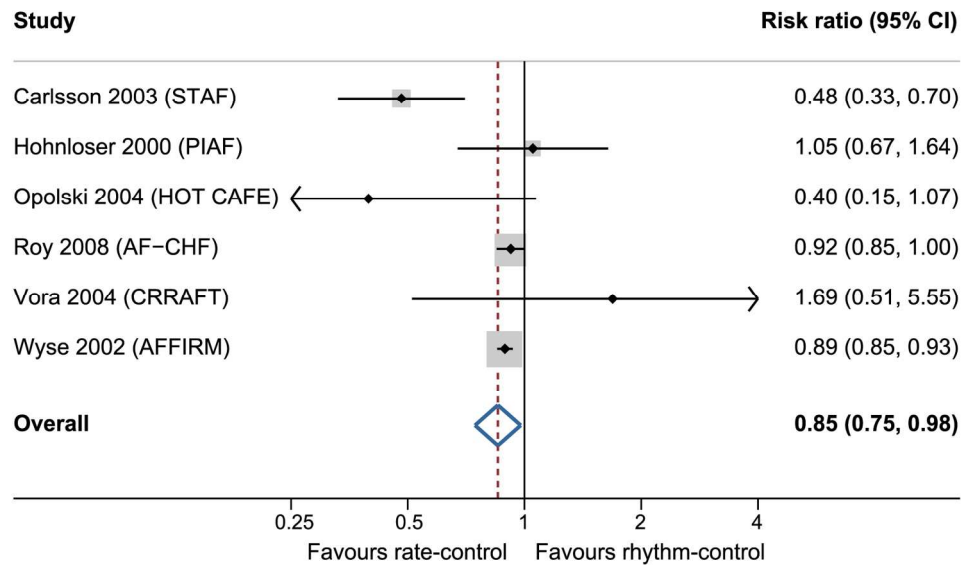

Figure 2: Hospitalisation in rate versus rhythm control trials  
 Meta-analysis of hospitalisation in the six largest rate versus rhythm control trials, excluding hospital visits for cardioversion procedures, where applicable. Studies are pooled with a random-effects model. Significant heterogeneity was identified, with an I2 value of 66.8% (p=0.01). Grey boxes represent the comparative weight of the study.  
 STAF, Strategies of Treatment of Atrial Fibrillation study (cardioversion/AAD versus rate control in persistent AF)<sup>81</sup>; PIAF, Pharmacological Intervention in Atrial Fibrillation trial (amiodarone/cardioversion versus diltiazem in persistent AF)<sup>82</sup>; HOT CAFE, How to Treat Chronic Atrial Fibrillation study (cardioversion/AAD versus rate control in persistent AF)<sup>83</sup>; AF-CHF, Atrial Fibrillation and Congestive Heart Failure trial (cardioversion/AAD versus rate control in paroxysmal/persistent AF with LVEF ≤35%)<sup>27</sup>; CRRRAFT, Control of Rate versus Rhythm in rheumatic Atrial Fibrillation Trial (cardioversion/amiodarone versus diltiazem in persistent AF due to rheumatic heart disease)<sup>84</sup>; AFFIRM, Atrial Fibrillation Follow-up Investigation of Rhythm Management study (AAD/cardioversion versus rate control in paroxysmal/persistent AF).<sup>22</sup>

157x106mm (300 x 300 DPI)

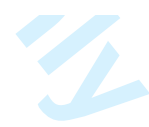

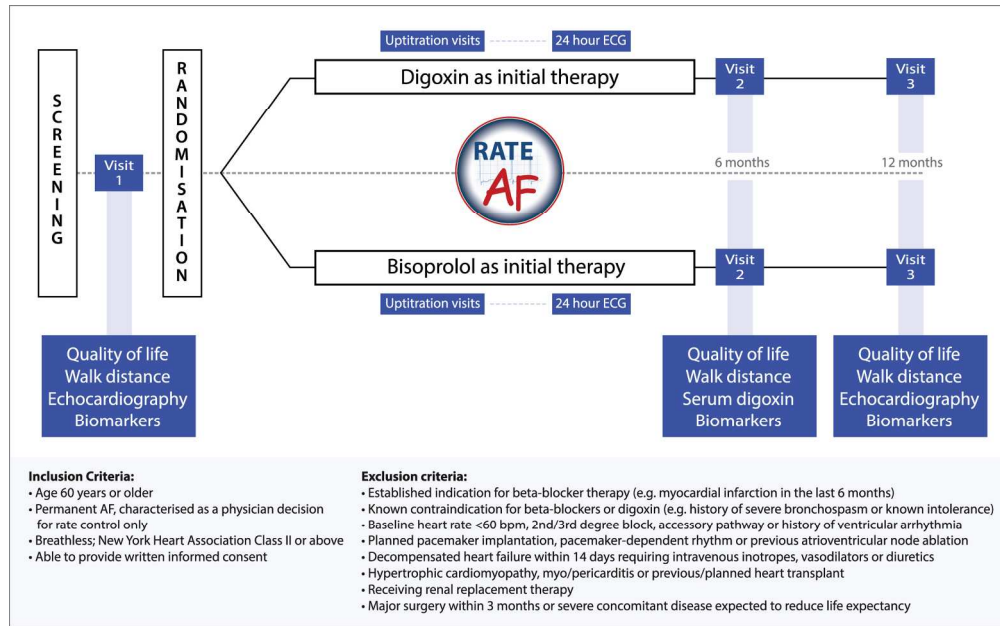

Figure 3: RATE-AF trial schema  
Trial flowchart, including major endpoints and inclusion/exclusion criteria.

183x114mm (300 x 300 DPI)

1  
2  
3  
4  
5  
6  
7  
8  
9  
10  
11  
12  
13  
14  
15  
16  
17  
18  
19  
20  
21  
22  
23  
24  
25  
26  
27  
28  
29  
30  
31  
32  
33  
34  
35  
36  
37  
38  
39  
40  
41  
42  
43  
44  
45  
46  
47  
48  
49  
50  
51  
52  
53  
54  
55  
56  
57  
58  
59  
60

# Evaluating different rate control therapies in permanent atrial fibrillation: A prospective, randomised, open-label, blinded endpoint trial comparing digoxin and beta-blockers as initial rate control therapy

## Rate control Therapy Evaluation in Atrial Fibrillation:

### RATE-AF

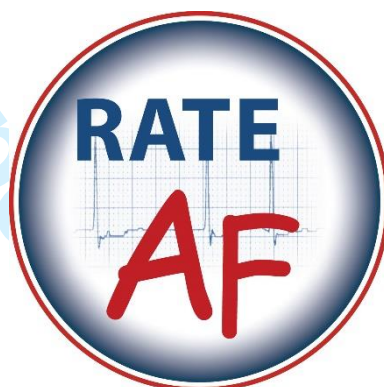

### RATE-AF TRIAL PROTOCOL

Version 1.0, 23<sup>rd</sup> March 2016

|                     |                                                                                |
|---------------------|--------------------------------------------------------------------------------|
| Sponsor:            | University of Birmingham                                                       |
| Chief Investigator: | Dr Dipak Kotecha                                                               |
| Coordinating Unit:  | Birmingham Clinical Trials Unit                                                |
| Funder:             | National Institute for Health Research (NIHR)<br>Career Development Fellowship |
| ISRCTN:             | TBC                                                                            |
| EudraCT No.:        | 2015-005043-13                                                                 |
| REC Ref. No.:       | TBC                                                                            |

UNIVERSITY OF  
BIRMINGHAM



**NHS**  
National Institute for  
Health Research

## TRIAL COMMITTEES AND CONTACT DETAILS

### Trial Management Group

|                              |                                                                                                                                                                                                                                                                                                                             |
|------------------------------|-----------------------------------------------------------------------------------------------------------------------------------------------------------------------------------------------------------------------------------------------------------------------------------------------------------------------------|
| <b>Chief Investigator</b>    | <b>NIHR Career Development Fellow &amp; Clinician Scientist</b>                                                                                                                                                                                                                                                             |
| <b>Dr Dipak Kotecha</b>      | Institute of Cardiovascular Sciences, University of Birmingham, The Medical School, Vincent Drive, Birmingham, B15 2TT, UK<br>Email: <a href="mailto:d.kotecha@bham.ac.uk">d.kotecha@bham.ac.uk</a><br>Telephone: 07974 115676                                                                                              |
| <b>Prof Paulus Kirchhof</b>  | <b>Professor of Cardiovascular Medicine</b><br>Institute of Cardiovascular Sciences, University of Birmingham, Institute of Biomedical Research, Vincent Drive, Birmingham B15 2TT, UK<br>Email: <a href="mailto:p.kirchhof@bham.ac.uk">p.kirchhof@bham.ac.uk</a><br>Telephone: 0121 414 7042                               |
| <b>Dr Michael Griffith</b>   | <b>Consultant Electrophysiologist</b><br>University Hospitals Birmingham NHS Trust, Nuffield House, Queen Elizabeth Hospital, Birmingham, B15 2TH, UK<br>Email: <a href="mailto:michael.griffith@uhb.nhs.uk">michael.griffith@uhb.nhs.uk</a><br>Telephone: 0121 371 4038                                                    |
| <b>Prof Gregory Y H Lip</b>  | <b>Professor of Cardiovascular Medicine &amp; Director, Haemostasis Thrombosis &amp; Vascular Biology Unit</b><br>Institute of Cardiovascular Sciences, University of Birmingham, City Hospital, Birmingham, B18 7QH, UK<br>Email <a href="mailto:g.y.h.lip@bham.ac.uk">g.y.h.lip@bham.ac.uk</a><br>Telephone: 0121 5075080 |
| <b>Prof Jonathan Townend</b> | <b>Professor of Cardiology</b><br>University Hospitals Birmingham NHS Trust, Nuffield House, Queen Elizabeth Hospital, Birmingham, B15 2TH, UK<br>Email: <a href="mailto:john.townend@uhb.nhs.uk">john.townend@uhb.nhs.uk</a><br>Telephone: 0121 371 4623                                                                   |
| <b>Dr Rick Steeds</b>        | <b>Consultant Cardiologist and Head of Cardiac Imaging</b><br>University Hospitals Birmingham NHS Trust, Nuffield House, Queen Elizabeth Hospital, Birmingham, B15 2TH, UK<br>Email: <a href="mailto:rick.steeds@uhb.nhs.uk">rick.steeds@uhb.nhs.uk</a><br>Telephone: 0121 371 6130                                         |
| <b>Prof Melanie Calvert</b>  | <b>Professor of Outcomes Methodology</b><br>Institute of Applied Health Research, University of Birmingham, Birmingham, B15 2TT, UK<br>Email: <a href="mailto:m.calvert@bham.ac.uk">m.calvert@bham.ac.uk</a><br>Telephone: 0121 414 8595                                                                                    |
| <b>Dr Susan Jowett</b>       | <b>Senior Lecturer, Health Economics</b><br>Institute of Applied Health Research, University of Birmingham, Birmingham, B15 2TT, UK<br>Email <a href="mailto:s.jowett@bham.ac.uk">s.jowett@bham.ac.uk</a><br>Telephone: 0121 414 7898                                                                                       |
| <b>Dr Jonathan Mathers</b>   | <b>Senior Lecturer, Qualitative and Mixed Methods Applied Health Research</b><br>Institute of Applied Health Research, University of Birmingham, Birmingham, B15 2TT, UK<br>Email <a href="mailto:j.m.mathers@bham.ac.uk">j.m.mathers@bham.ac.uk</a><br>Telephone: 0121 414 6024                                            |

### Birmingham Clinical Trials Unit

|                          |                                                                                                                                                                                                                                                |
|--------------------------|------------------------------------------------------------------------------------------------------------------------------------------------------------------------------------------------------------------------------------------------|
| <b>Prof Jon Deeks</b>    | <b>Professor of Biostatistics and Director, BCTU</b><br><br>Birmingham Clinical Trials Unit, University of Birmingham, Birmingham, B15 2TT, UK<br>Email <a href="mailto:j.deeks@bham.ac.uk">j.deeks@bham.ac.uk</a><br>Telephone: 0121 414 5328 |
| <b>Dr Margaret Grant</b> | <b>Operations Manager</b><br><br>Birmingham Clinical Trials Unit, University of Birmingham, Birmingham, B15 2TT, UK<br>Email <a href="mailto:m.r.grant@bham.ac.uk">m.r.grant@bham.ac.uk</a><br>Telephone: 0121 415 9106                        |
| <b>Gemma Slinn</b>       | <b>Senior Trial Coordinator</b><br><br>Birmingham Clinical Trials Unit, University of Birmingham, Birmingham, B15 2TT, UK<br>Email <a href="mailto:g.slinn@bham.ac.uk">g.slinn@bham.ac.uk</a><br>Telephone: 0121 415 8445                      |
| <b>Samir Mehta</b>       | <b>Statistician</b><br><br>Birmingham Clinical Trials Unit, University of Birmingham, Birmingham, B15 2TT, UK<br>Email <a href="mailto:s.mehta.1@bham.ac.uk">s.mehta.1@bham.ac.uk</a><br>Telephone: 0121 415 9117                              |

### Trial Oversight Committee

#### Co-Chairs

|                        |                                                                                                                                                                                                                                                                                                                                                                                         |
|------------------------|-----------------------------------------------------------------------------------------------------------------------------------------------------------------------------------------------------------------------------------------------------------------------------------------------------------------------------------------------------------------------------------------|
| <b>Dr Kazem Rahimi</b> | <b>Associate Professor of Cardiovascular Medicine, University of Oxford<br/>Deputy Director, The George Institute for Global Health</b><br><br>The George Institute for Global Health, University of Oxford, 34 Broad Street, Oxford OX1 3BD, UK<br>Email: <a href="mailto:kazem.rahimi@georgeinstitute.ox.ac.uk">kazem.rahimi@georgeinstitute.ox.ac.uk</a><br>Telephone: 01865 617 201 |
| <b>Prof. John Camm</b> | <b>BHF Professor of Clinical Cardiology</b><br><br>St George's University of London, Cranmer Terrace, London SW17 0RE, UK<br>Email: <a href="mailto:jcamm@sgul.ac.uk">jcamm@sgul.ac.uk</a><br>Telephone: 0208 725 3414                                                                                                                                                                  |

#### Patient Representative

|                      |                                                                                                  |
|----------------------|--------------------------------------------------------------------------------------------------|
| <b>Mary Stanbury</b> | Lead PPI Representative<br>Email: <a href="mailto:dms27@btinternet.com">dms27@btinternet.com</a> |
|----------------------|--------------------------------------------------------------------------------------------------|

#### On behalf of the Trial Management Group

|                              |                                                 |
|------------------------------|-------------------------------------------------|
| <b>Dr Dipak Kotecha</b>      |                                                 |
| <b>Prof. Jon Deeks</b>       | For contact details, see Trial Management Group |
| <b>Prof. Paulus Kirchhof</b> |                                                 |

## RATE-AF Trial Office

For general protocol related queries and supply of trial materials:

Birmingham Clinical Trials Unit (BCTU), Institute of Applied Health Research, College of Medical & Dental Sciences, Public Health Building, University of Birmingham, Edgbaston, Birmingham B15 2TT

Telephone: 0121 415 8445  
 Fax: 0121 415 9135  
 Email: RATE-AF@trials.bham.ac.uk  
 Website: www.birmingham.ac.uk/RATE-AF

## Randomisation

Telephone: 0800 953 0274

Website: <https://www.birmingham.ac.uk/RATEAF>

## Safety Reporting

Fax SAE Forms to: 0121 415 9135 or 0121 415 9136

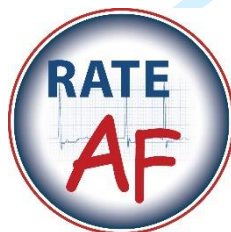

## Protocol Development and Sign Off

### Protocol Amendments

The following amendments and/ or administrative changes have been made to this protocol since the implementation of the first approved version

| Amendment number | Date of amendment | Protocol version number | Type of amendment | Summary of amendment |
|------------------|-------------------|-------------------------|-------------------|----------------------|
|                  |                   |                         |                   |                      |

**Chief Investigator Signature Page**

Trial Name: **RATE-AF**

Protocol Version Number: Version: \_\_ \_\_

Protocol Version Date: \_\_ \_\_ / \_\_ \_\_ \_\_ / \_\_ \_\_ \_\_ \_\_

**This protocol has been approved by:**

CI Name: Dr Dipak Kotecha

Trial Role: Chief Investigator

Signature and date: \_\_\_\_\_ \_\_ \_\_ / \_\_ \_\_ \_\_ / \_\_ \_\_ \_\_ \_\_

**Sponsor Statement**

Where the University of Birmingham takes on the sponsor role for protocol development oversight, the signing of the IRAS form by the Sponsor will serve as confirmation of the approval of this protocol.



1  
2  
3  
4  
5  
6  
7  
8  
9  
10  
11  
12  
13  
14  
15  
16  
17  
18  
19  
20  
21  
22  
23  
24  
25  
26  
27  
28  
29  
30  
31  
32  
33  
34  
35  
36  
37  
38  
39  
40  
41  
42  
43  
44  
45  
46  
47  
48  
49  
50  
51  
52  
53  
54  
55  
56  
57  
58  
59  
60

## Principal Investigator Signature Page

### Principal Investigator:

I have read and agree to the protocol, as detailed in this document. I agree to adhere to the protocol as outlined and agree that any suggested changes to the protocol must be approved by the Trial Oversight Committee prior to seeking approval from the Research Ethics Committee and Regulatory Authority.

I am aware of my responsibilities as an Investigator under the guidelines of Good Clinical Practice (GCP), the Declaration of Helsinki, local regulations (as applicable) and the trial protocol and I agree to conduct the trial according to these guidelines and to appropriately direct and assist the staff under my control, who will be involved in the trial.

Trial Name: **RATE-AF**

Protocol Version Number:      Version: \_\_\_\_\_

Protocol Version Date:    \_\_\_ / \_\_\_ / \_\_\_

PI Name:                      <Enter>

Trial Role:                  Principal Investigator

Signature and date:                      \_\_\_\_\_ / \_\_\_ / \_\_\_

**The Principal Investigator should sign this page and return a copy to the RATE-AF Trial Office**

## Table of Contents

|          |                                                           |           |
|----------|-----------------------------------------------------------|-----------|
| <b>1</b> | <b>Trial Summary</b> .....                                | <b>13</b> |
| 1.1      | Trial Schema .....                                        | 15        |
| <b>2</b> | <b>Introduction</b> .....                                 | <b>16</b> |
| 2.1      | Background .....                                          | 16        |
| 2.2      | Epidemiology and Consequences of AF .....                 | 16        |
| 2.3      | Rhythm-Control in AF .....                                | 17        |
| 2.4      | Lack of Evidence to Guide Rate-Control Therapy .....      | 17        |
| 2.5      | Patient Wellbeing .....                                   | 19        |
| 2.6      | Rationale for the RATE-AF Trial .....                     | 19        |
| <b>3</b> | <b>Trial Design and Objectives</b> .....                  | <b>20</b> |
| 3.1      | Hypothesis .....                                          | 20        |
| 3.2      | Primary objective .....                                   | 21        |
| 3.3      | Secondary objectives .....                                | 21        |
| 3.4      | Feasibility objectives .....                              | 21        |
| 3.5      | Exploratory objectives .....                              | 21        |
| <b>4</b> | <b>Selection of Participants</b> .....                    | <b>22</b> |
| 4.1      | Inclusion Criteria .....                                  | 22        |
| 4.2      | Exclusion Criteria .....                                  | 22        |
| <b>5</b> | <b>Informed Consent Process</b> .....                     | <b>23</b> |
| <b>6</b> | <b>Enrolment and Randomisation</b> .....                  | <b>24</b> |
| 6.1      | Randomisation Procedures .....                            | 25        |
| <b>7</b> | <b>Trial Treatment</b> .....                              | <b>26</b> |
| 7.1      | Treatment .....                                           | 26        |
| 7.2      | Treatment Supply and Storage .....                        | 26        |
| 7.3      | Dosing Schedule .....                                     | 27        |
| 7.4      | Drug Interactions and Contraindications .....             | 27        |
| 7.5      | Accountability Procedures and Labelling .....             | 29        |
| 7.6      | Treatment Modification .....                              | 29        |
| 7.7      | Assessment of Compliance .....                            | 30        |
| <b>8</b> | <b>Trial Procedures and Schedule of Assessments</b> ..... | <b>30</b> |
| 8.1      | Baseline Visit .....                                      | 30        |

|    |                                                                 |           |
|----|-----------------------------------------------------------------|-----------|
| 1  |                                                                 |           |
| 2  |                                                                 |           |
| 3  | 8.2 Up-Titration Visits .....                                   | 31        |
| 4  | 8.3 Visit 2, Month 6.....                                       | 31        |
| 5  | 8.4 Visit 3, Month 12 (Final Trial Assessment).....             | 32        |
| 6  | 8.5 Investigator-blinded Endpoints .....                        | 32        |
| 7  | 8.6 Long Term Follow-Up .....                                   | 32        |
| 8  | 8.7 Withdrawal .....                                            | 33        |
| 9  | 8.8 Trial Duration.....                                         | 33        |
| 10 | <b>9 Trial Procedures.....</b>                                  | <b>35</b> |
| 11 | 9.1 Procedures Defined as Standard Clinical Care.....           | 35        |
| 12 | 9.2 Medical History .....                                       | 35        |
| 13 | 9.3 Medication History .....                                    | 35        |
| 14 | 9.4 Physical Examination .....                                  | 36        |
| 15 | 9.5 Patient Reported Outcomes .....                             | 36        |
| 16 | 9.5.1 Choice of Outcomes and Qualitative Research.....          | 36        |
| 17 | 9.5.2 Data Collection for PROMs.....                            | 37        |
| 18 | 9.5.3 Outcome Appraisal .....                                   | 38        |
| 19 | 9.6 Transthoracic Echocardiography .....                        | 38        |
| 20 | 9.6.1 Reproducibility and Validity of Measurements .....        | 38        |
| 21 | 9.6.2 Systolic LV Function.....                                 | 38        |
| 22 | 9.6.3 Diastolic LV Function.....                                | 39        |
| 23 | 9.6.4 Left Atrial Size and Function.....                        | 40        |
| 24 | 9.6.5 Additional Echocardiography Parameters.....               | 40        |
| 25 | 9.7 Laboratory Evaluations.....                                 | 40        |
| 26 | 9.7.1 Laboratory Assays.....                                    | 41        |
| 27 | 9.7.2 Cellular Response to Rate Control .....                   | 41        |
| 28 | 9.7.3 Stored Blood Samples.....                                 | 41        |
| 29 | 9.7.4 Specimen Preparation, Handling, Storage and Shipment..... | 41        |
| 30 | 9.8 Economic Evaluation .....                                   | 41        |
| 31 | <b>10 Pharmacovigilance .....</b>                               | <b>43</b> |
| 32 | 10.1 Recording and Assessment of Adverse Events .....           | 43        |
| 33 | 10.2 Non-Serious Adverse Events/ Adverse Reactions .....        | 45        |
| 34 | 10.3 Serious Adverse Events .....                               | 45        |
| 35 |                                                                 |           |
| 36 |                                                                 |           |
| 37 |                                                                 |           |
| 38 |                                                                 |           |
| 39 |                                                                 |           |
| 40 |                                                                 |           |
| 41 |                                                                 |           |
| 42 |                                                                 |           |
| 43 |                                                                 |           |
| 44 |                                                                 |           |
| 45 |                                                                 |           |
| 46 |                                                                 |           |
| 47 |                                                                 |           |
| 48 |                                                                 |           |
| 49 |                                                                 |           |
| 50 |                                                                 |           |
| 51 |                                                                 |           |
| 52 |                                                                 |           |
| 53 |                                                                 |           |
| 54 |                                                                 |           |
| 55 |                                                                 |           |
| 56 |                                                                 |           |
| 57 |                                                                 |           |
| 58 |                                                                 |           |
| 59 |                                                                 |           |
| 60 |                                                                 |           |

1  
2  
3 10.3.1 Expected SAEs NOT to be Reported on a SAE Form..... 45  
4  
5 10.4 SUSARs ..... 45  
6  
7 10.5 Development Safety Update Reports..... 46  
8  
9 10.6 Annual Progress Reports..... 46  
10  
11 10.7 Pregnancy ..... 46  
12  
13 10.8 Reporting Urgent Safety Measures..... 46  
14  
15 **11 Quality Control and Quality Assurance..... 47**  
16  
17 11.1 Site Set-Up and Initiation ..... 47  
18  
19 11.2 Central Monitoring ..... 47  
20  
21 11.3 Audit and Inspection ..... 47  
22  
23 11.4 Notification of Serious Breaches..... 48  
24  
25 11.5 Data Handling and Analysis..... 48  
26  
27 11.6 End of Trial..... 49  
28  
29 11.7 Archiving ..... 49  
30  
31 **12 Statistical Considerations ..... 50**  
32  
33 12.1 Outcome measures ..... 50  
34  
35 12.1.1 Primary Outcome ..... 50  
36  
37 12.1.2 Secondary Outcomes ..... 50  
38  
39 12.1.3 Feasibility Outcomes ..... 50  
40  
41 12.2 Power Calculations..... 51  
42  
43 12.3 Statistical analysis ..... 51  
44  
45 12.3.1 Primary outcome analysis..... 52  
46  
47 12.3.2 Feasibility and Secondary outcomes analysis..... 52  
48  
49 12.3.3 Missing data and sensitivity analyses ..... 52  
50  
51 12.3.4 Interim analyses and Stopping rules..... 52  
52  
53 12.4 Final analysis..... 53  
54  
55 **13 Ethics and Regulatory Requirements..... 53**  
56  
57 **14 Oversight Committees..... 53**  
58  
59 14.1 Trial Management Group..... 53  
60  
14.2 Trial Oversight Committee ..... 54  
14.3 Protocol amendments..... 54  
**15 Finance ..... 54**

1  
2  
3  
4  
5  
6  
7  
8  
9  
10  
11  
12  
13  
14  
15  
16  
17  
18  
19  
20  
21  
22  
23  
24  
25  
26  
27  
28  
29  
30  
31  
32  
33  
34  
35  
36  
37  
38  
39  
40  
41  
42  
43  
44  
45  
46  
47  
48  
49  
50  
51  
52  
53  
54  
55  
56  
57  
58  
59  
60

**16 Confidentiality and Data Protection..... 54**

**17 Insurance and Indemnity ..... 55**

**18 Dissemination and Publication ..... 55**

**19 Statement of Compliance ..... 56**

**20 References ..... 57**

**Appendix A: Randomised treatment arm - Digoxin**

**Appendix B: Randomised treatment arm - Bisoprolol**

For peer review only

## List of Abbreviations

|                    |                                                                   |
|--------------------|-------------------------------------------------------------------|
| <b>ABPI</b>        | Association of the British Pharmaceutical Industry                |
| <b>AE</b>          | Adverse Event                                                     |
| <b>AF</b>          | Atrial Fibrillation                                               |
| <b>BCTU</b>        | Birmingham Clinical Trials Unit                                   |
| <b>BNP</b>         | B-type Natriuretic Peptide                                        |
| <b>BPM</b>         | Beats per Minute                                                  |
| <b>CCB</b>         | Calcium Channel Blocker                                           |
| <b>CI</b>          | Chief Investigator                                                |
| <b>CMR</b>         | Cardiac Magnetic Resonance                                        |
| <b>CRF</b>         | Case Report Form                                                  |
| <b>CTA</b>         | Clinical Trial Authorisation                                      |
| <b>CTIMP</b>       | Clinical Trial of Medicinal Product                               |
| <b>DIBD</b>        | Developmental International Birth Date                            |
| <b>DMC</b>         | Data Monitoring Committee                                         |
| <b>DSUR</b>        | Developmental Safety Update Report                                |
| <b>DT</b>          | Deceleration Time                                                 |
| <b>ECG</b>         | Electrocardiogram                                                 |
| <b>EHRA</b>        | European Heart Rhythm Association                                 |
| <b>EU</b>          | European Union                                                    |
| <b>EudraCT No.</b> | European Union Drug Regulating Authorities Clinical Trials Number |
| <b>GCP</b>         | Good Clinical Practice                                            |
| <b>GFR</b>         | Glomerular Filtration Rate                                        |
| <b>GP</b>          | General Practitioner                                              |
| <b>HF</b>          | Heart Failure                                                     |
| <b>HR</b>          | Hazard Ratio                                                      |
| <b>IMP</b>         | Investigational Medicinal Product                                 |
| <b>INR</b>         | International Normalised Ratio                                    |
| <b>ISRCTN</b>      | International Standard Randomised Controlled Trial Number         |
| <b>IVRT</b>        | Isovolumic Relaxation Time                                        |
| <b>LA</b>          | Left-Atrial                                                       |
| <b>LV</b>          | Left-Ventricular                                                  |
| <b>LVEDD</b>       | Left-Ventricle End-Diastolic Dimension                            |
| <b>LVEDV</b>       | Left-Ventricle End-Diastolic Volume                               |
| <b>LVEF</b>        | Left-Ventricular Ejection Fraction                                |

1  
2  
3  
4  
5  
6  
7  
8  
9  
10  
11  
12  
13  
14  
15  
16  
17  
18  
19  
20  
21  
22  
23  
24  
25  
26  
27  
28  
29  
30  
31  
32  
33  
34  
35  
36  
37  
38  
39  
40  
41  
42  
43  
44  
45  
46  
47  
48  
49  
50  
51  
52  
53  
54  
55  
56  
57  
58  
59  
60

|                |                                                                                        |
|----------------|----------------------------------------------------------------------------------------|
| <b>LVESD</b>   | Left-Ventricle End-Systolic Dimension                                                  |
| <b>LVESV</b>   | Left-Ventricle End-Systolic Volume                                                     |
| <b>LVSD</b>    | Left-Ventricular Systolic Dysfunction                                                  |
| <b>MHRA</b>    | Medicines and Healthcare Products Regulatory Agency                                    |
| <b>MREC</b>    | Main Research Ethics Committee                                                         |
| <b>NHS</b>     | National Health Service                                                                |
| <b>NICE</b>    | National Institute of Clinical Excellence                                              |
| <b>NOAC</b>    | Novel Oral Anticoagulants                                                              |
| <b>NYHA</b>    | New York Health Association                                                            |
| <b>PEF</b>     | Preserved Ejection Fraction                                                            |
| <b>PI</b>      | Principal Investigator                                                                 |
| <b>PIC</b>     | Patient Identification Centre                                                          |
| <b>PIL</b>     | Participant Information Leaflet                                                        |
| <b>PROBE</b>   | Prospective Randomised Open Blinded End-point                                          |
| <b>QALY</b>    | Quality-Adjusted Life Year                                                             |
| <b>QoL</b>     | Quality of Life                                                                        |
| <b>R&amp;D</b> | Research and Development                                                               |
| <b>RCT</b>     | Randomised Controlled Trial                                                            |
| <b>REC</b>     | Research Ethics Committee                                                              |
| <b>SAE</b>     | Serious Adverse Event                                                                  |
| <b>SAR</b>     | Serious Adverse Reaction                                                               |
| <b>SD</b>      | Standard Deviation                                                                     |
| <b>SmPC</b>    | Summary of Product Characteristics                                                     |
| <b>SUSAR</b>   | Suspected Unexpected Serious Adverse Reaction                                          |
| <b>TAPSE</b>   | Tricuspid Annular Plane Systolic Excursion                                             |
| <b>TDI</b>     | Tissue Doppler Imaging                                                                 |
| <b>TMF</b>     | Trial Master File                                                                      |
| <b>TMG</b>     | Trial Management Group                                                                 |
| <b>TSC</b>     | Trial Steering Committee                                                               |
| <b>UHB</b>     | University Hospitals Birmingham                                                        |
| <b>WTCRF</b>   | NIHR Wellcome Trust Clinical Research Facility at Queen Elizabeth Hospital, Birmingham |

# 1 Trial Summary

|                          |                                                                                                                                                                                                                                                                                                                                                                                                                                                                                                                                                                                                                                                                                                                                                                                                                                                                                                                                                                                                                                                                                                                                                                                                                                                                                                                                                                                                                                                                                                                                          |
|--------------------------|------------------------------------------------------------------------------------------------------------------------------------------------------------------------------------------------------------------------------------------------------------------------------------------------------------------------------------------------------------------------------------------------------------------------------------------------------------------------------------------------------------------------------------------------------------------------------------------------------------------------------------------------------------------------------------------------------------------------------------------------------------------------------------------------------------------------------------------------------------------------------------------------------------------------------------------------------------------------------------------------------------------------------------------------------------------------------------------------------------------------------------------------------------------------------------------------------------------------------------------------------------------------------------------------------------------------------------------------------------------------------------------------------------------------------------------------------------------------------------------------------------------------------------------|
| Title                    | <p>Evaluating different rate control therapies in permanent atrial fibrillation: A prospective, randomised, open-label, blinded endpoint trial comparing digoxin and beta-blockers as initial rate control therapy</p> <p><b><u>R</u>Ate control <u>T</u>herapy <u>E</u>valuation in <u>A</u>trial <u>F</u>ibrillation: RATE-AF</b></p>                                                                                                                                                                                                                                                                                                                                                                                                                                                                                                                                                                                                                                                                                                                                                                                                                                                                                                                                                                                                                                                                                                                                                                                                  |
| Acronym                  | RATE-AF                                                                                                                                                                                                                                                                                                                                                                                                                                                                                                                                                                                                                                                                                                                                                                                                                                                                                                                                                                                                                                                                                                                                                                                                                                                                                                                                                                                                                                                                                                                                  |
| Trial Design and Methods | <p>A prospective, randomised, open-label, blinded-endpoint (PROBE) trial design. The RATE-AF trial combines hypothesis testing (quality of life, cardiac function, exercise capacity and biomarkers), evaluation of measures (validity, reproducibility and correlation of outcomes) and a feasibility study for a future clinical event trial (assessing recruitment, retention and sample size).</p>                                                                                                                                                                                                                                                                                                                                                                                                                                                                                                                                                                                                                                                                                                                                                                                                                                                                                                                                                                                                                                                                                                                                   |
| Trial Medications        | <p>Digoxin 62.5 – 250 µg od<br/>Bisoprolol 1.25 – 15 mg od</p>                                                                                                                                                                                                                                                                                                                                                                                                                                                                                                                                                                                                                                                                                                                                                                                                                                                                                                                                                                                                                                                                                                                                                                                                                                                                                                                                                                                                                                                                           |
| Trial Outcomes           | <p><b><u>Primary Outcome:</u></b></p> <p>Patient-reported quality of life (QoL): SF-36 physical component summary score at six months</p> <p><b><u>Secondary Outcomes:</u></b></p> <p>Patient-reported QoL:</p> <ul style="list-style-type: none"> <li>• SF-36 global and domain-specific scores at 6 and 12 months</li> <li>• EQ-5D-5L summary index and visual analogue scale at six and twelve months</li> <li>• AFEQT overall score at six and twelve months</li> </ul> <p>Cardiac function:</p> <ul style="list-style-type: none"> <li>• Echocardiographic LVEF at 12 months</li> <li>• Diastolic function (E/e' and composite of diastolic indices) at 12 months</li> </ul> <p>Functional assessment:</p> <ul style="list-style-type: none"> <li>• Six-minute walking distance at 6 and 12 months</li> <li>• Change in European Heart Rhythm Association (EHRA) class at 6 and 12 months</li> </ul> <p>Biomarkers:</p> <ul style="list-style-type: none"> <li>• Change in B-type natriuretic peptide (BNP) levels at 6 months</li> </ul> <p>Change in heart rate using 24-hour ambulatory ECG</p> <p><b><u>Feasibility Outcomes:</u></b></p> <p>Recruitment target of 3 patients per week across all participating centres.</p> <p>Compliance and reasons for non-compliance</p> <p>Number of withdrawals and losses to follow-up (with reasons)</p> <p>Drug discontinuation rate and adverse reactions requiring drug discontinuation.</p> <p>Number of patients needing therapy-induced requirement for additional treatment</p> |



|                                           |                                                                                                                                                                                                                                                                                                                                                                                                |
|-------------------------------------------|------------------------------------------------------------------------------------------------------------------------------------------------------------------------------------------------------------------------------------------------------------------------------------------------------------------------------------------------------------------------------------------------|
|                                           | Population-specific standard deviations (SD) and proportions: <ul style="list-style-type: none"> <li>SD of SF36 physical functioning score at 6 and 12 months</li> <li>SD of SF36 overall score at 6 and 12 months</li> <li>SD of AFEQT overall score at 6 and 12 months</li> <li>SD of LVEF and E/e' scores at 6 and 12 months</li> <li>Unplanned hospitalisation admissions rates</li> </ul> |
|                                           | Cardiovascular Events (particularly mortality, thromboembolic events, myocardial infarction and cardiovascular interventions)                                                                                                                                                                                                                                                                  |
| <b>Trial Duration per Participant</b>     | 12 months of trial therapy                                                                                                                                                                                                                                                                                                                                                                     |
| <b>Planned Trial Sites</b>                | Multiple screening sites with single site recruitment                                                                                                                                                                                                                                                                                                                                          |
| <b>Total Number of Participants</b>       | 160                                                                                                                                                                                                                                                                                                                                                                                            |
| <b>Main Inclusion/ Exclusion Criteria</b> | <b><u>Inclusion Criteria</u></b>                                                                                                                                                                                                                                                                                                                                                               |
|                                           | Adult patients, aged 60 years or older                                                                                                                                                                                                                                                                                                                                                         |
|                                           | Permanent AF, characterised (at time of randomisation) as a physician decision for rate-control with no plans for cardioversion, anti-arrhythmic medication, or ablation therapy                                                                                                                                                                                                               |
|                                           | Symptoms of breathlessness (New York Heart Association Class II or more)                                                                                                                                                                                                                                                                                                                       |
|                                           | Able to provide written, informed consent                                                                                                                                                                                                                                                                                                                                                      |
|                                           | <b><u>Exclusion Criteria</u></b>                                                                                                                                                                                                                                                                                                                                                               |
|                                           | Established indication for beta-blocker therapy, e.g. myocardial infarction in the last 6 months                                                                                                                                                                                                                                                                                               |
|                                           | Known contraindications for therapy with beta-blockers or digoxin, e.g. a history of severe bronchospasm that would preclude use of beta-blockers, or known intolerance to these medications                                                                                                                                                                                                   |
|                                           | Baseline heart rate <60 bpm                                                                                                                                                                                                                                                                                                                                                                    |
|                                           | History of second or third-degree heart block                                                                                                                                                                                                                                                                                                                                                  |
|                                           | Supraventricular arrhythmias associated with accessory conducting pathways (e.g. Wolff-Parkinson-White syndrome) or a history of ventricular tachycardia or fibrillation                                                                                                                                                                                                                       |
|                                           | Planned pacemaker implantation (including cardiac resynchronisation therapy), pacemaker-dependent rhythm or history of atrioventricular node ablation                                                                                                                                                                                                                                          |
|                                           | Decompensated heart failure (evidenced by need for intravenous inotropes, vasodilators or diuretics) within 14 days prior to randomisation                                                                                                                                                                                                                                                     |
|                                           | A current diagnosis of obstructive hypertrophic cardiomyopathy, myocarditis or constrictive pericarditis                                                                                                                                                                                                                                                                                       |
|                                           | Received or on waiting list for heart transplantation                                                                                                                                                                                                                                                                                                                                          |
|                                           | Receiving renal replacement therapy                                                                                                                                                                                                                                                                                                                                                            |
|                                           | Major surgery, including thoracic or cardiac surgery, within 3 months of randomisation                                                                                                                                                                                                                                                                                                         |
|                                           | Severe, concomitant non-cardiovascular disease (including malignancy) that is expected to reduce life expectancy                                                                                                                                                                                                                                                                               |

# 1.1 Trial Schema

Figure 1



This protocol describes the **RATE-AF** trial only. The trial will be conducted in accordance with the protocol, Good Clinical Practice (GCP) and applicable regulatory requirements. Every care has been taken in the drafting of this protocol, but future amendments may be necessary, which will receive the required approvals prior to implementation.

## 2 Introduction

### 2.1 Background

Atrial fibrillation (AF) is an increasingly common cardiac condition that leads to a substantial burden on quality-of-life (QoL), an increased risk of cardiovascular events, hospitalisation and death, and significant healthcare costs for the NHS. In addition to anticoagulation and considerations for rhythm control therapy, most patients with AF are in need of pharmacological control of heart rate. This aspect of care has not received stringent investigation, with treatment guidelines based on small crossover studies and observational data rather than robust controlled trials.<sup>1-3</sup> Beta-blocker monotherapy remains the first-line option in the current NICE AF guidelines consultation document, with digoxin only for sedentary patients, although this recommendation is based on 'very low-quality evidence'.<sup>4</sup> The benefit of different rate-control therapies on symptoms and other intermediate outcomes (such as left-ventricular ejection fraction [LVEF] and diastolic function) are unknown, as are their effects on clinical events such as hospitalisation. This situation is unacceptable in light of the potential benefits and risk of different rate-control options in AF. It also limits our ability to personalise treatment according to patient characteristics.

The RAte control Therapy Evaluation in Atrial Fibrillation (**RATE-AF**) trial is informed by a number of in-depth systematic reviews of management and clinical outcomes in AF patients.<sup>5-11</sup> Taken together, this information provides a sound basis to plan a major randomised controlled trial (RCT).<sup>12, 13</sup> However as trials of rate-control in AF have typically been small or uncontrolled, further information is needed before designing a trial that can assess clinical outcomes. The **RATE-AF** trial will allow us to define appropriate primary and secondary outcome measures and their standard deviation in a contemporary population of patients with permanent AF. This information will allow us to estimate sample size, determination of recruitment, retention and adherence policies, and to ascertain the best methods of obtaining adverse event data and reliable economic costs for a larger trial assessing cardiovascular outcomes and hospitalisation. The **RATE-AF** trial will also be the largest RCT of its kind, allowing us to compare the effect of beta-blockers and digoxin on QoL as initial rate-control therapy in patients with permanent AF. The long-term aim of the research is to answer key questions about how to initiate therapy, stratified by relevant patient characteristics such as systolic and diastolic cardiac function, baseline symptoms and concurrent medication. The research will also define the pathophysiological mechanisms underlying AF-related symptoms, left-ventricular function and their association with adverse clinical outcomes, and to identify clinical markers for the response to different rate control therapy.

### 2.2 Epidemiology and Consequences of AF

AF is a common condition that is associated with increased rates of mortality and serious morbidity, including stroke, worsening of heart failure, sudden death, and reduced QoL.<sup>1</sup> The prevalence of AF increases with age, ranging from 0.7% in those aged 55–59 years to 17.8% in those aged above 85.<sup>14</sup> A doubling of both incidence and prevalence of AF is predicted in the next 20 years.<sup>15</sup>

1  
2  
3  
4  
5  
6  
7  
8  
9  
10  
11  
12  
13  
14  
15  
16  
17  
18  
19  
20  
21  
22  
23  
24  
25  
26  
27  
28  
29  
30  
31  
32  
33  
34  
35  
36  
37  
38  
39  
40  
41  
42  
43  
44  
45  
46  
47  
48  
49  
50  
51  
52  
53  
54  
55  
56  
57  
58  
59  
60

Patients with AF are twice as likely to be hospitalised as propensity score-matched controls, with direct medical costs estimated to be 73% higher.<sup>16</sup> Further, AF is an independent predictor of all-cause mortality, with a two-fold adjusted increase in death.<sup>17, 18</sup> While most strokes in AF can be prevented by oral anticoagulation, AF patients still have high cardiovascular death rates due to sudden death or progressive heart failure.<sup>19, 20</sup> Patients with AF also have significantly poorer QoL<sup>21</sup>, experiencing a variety of symptoms including lethargy, palpitations, dyspnoea, sleeping difficulties and psychosocial distress.<sup>22, 23</sup> In the context of patients diagnosed with heart failure, the presence of AF leads to higher rates of death and hospitalisation, independent of other risk variables or which condition comes first.<sup>24, 25</sup> From observational data, 40% of AF patients will be diagnosed with heart failure and vice-versa<sup>16</sup>, representing a large and growing unmet clinical need for healthcare improvement.

### 2.3 Rhythm-Control in AF

Numerous large RCTs comparing rhythm-control (using arrhythmic drugs and/or cardioversion) versus rate-control have identified no significant difference in clinical outcomes in patients with persistent AF.<sup>26-30</sup> In a number of studies, hospitalisation rates were actually higher in those randomised to rhythm-control.<sup>26, 29, 30</sup> Similar findings have been shown in AF patients with heart failure<sup>31, 32</sup>, both in those with impaired and preserved ejection fraction.<sup>33-35</sup> Although AF ablation is becoming increasingly popular to restore sinus rhythm, it remains a highly invasive method to improve AF-related symptoms.<sup>36, 37</sup> At present, European and NICE treatment guidelines recommend ablation only in symptomatic paroxysmal AF, or as a treatment option in symptomatic persistent AF that is refractory to other therapy.<sup>3</sup> Further trials are currently underway to determine the clinical value of prompt rhythm-control, including the Early treatment of Atrial fibrillation for Stroke prevention Trial (EAST).<sup>38</sup> In light of the high recurrence rate of AF (even in patients receiving intensive rhythm-control therapy), rate-control is an important part of AF management in almost all patients. Unfortunately, rate-control therapy has much less evidence underpinning its use.

### 2.4 Lack of Evidence to Guide Rate-Control Therapy

Rate-control in AF can be achieved with beta-blockers, non-dihydropyridine calcium-channel blockers (CCB), digoxin and their combinations. Unfortunately, little data exists to assist clinicians in choosing appropriate first-line and subsequent therapy. Current patterns of medication usage vary considerably (between and within countries). For example, in a worldwide registry, digoxin was prescribed in 2877 of 10,523 patients (27.3%), compared to 1599 of 3141 (50.9%) of patients in the German Competence NETwork on Atrial Fibrillation (AFNET).<sup>39, 40</sup>

Current European guidelines suggest “the choice of medication should be individualised and the dose modulated to avoid bradycardia”. This recommendation (Class 1, Level B) is based on a systematic review of trials addressing rate-control between 1983 and 1997.<sup>41</sup> Most of the studies included less than 50 participants (with several less than 10). The majority were low quality studies, as assessed by the risk of bias or confounding, and follow-up was typically in the order of

1  
2  
3 hours, days or weeks. Whilst this may be sufficient to assess an acute effect on heart-rate, it  
4 provides limited data on the longer-term effects of different treatments or the frequency of  
5 adverse reactions.  
6

7  
8 Beta-blockers are often preferred over other agents due to the prognostic benefit seen in patients  
9 with heart failure who are in sinus rhythm. However, in patients with heart failure, reduced LVEF  
10 and concomitant AF, we have shown that beta-blockers do not reduce mortality (hazard ratio  
11 0.97, 95% CI 0.83-1.14; p=0.73) or cardiovascular hospital admissions (hazard ratio 0.91; 95%  
12 CI 0.79-1.04; p=0.15).<sup>5</sup> This distinctly contrasts with the significant benefit seen in patients with  
13 sinus rhythm and highlights the need for further comparative RCTs specifically in patients with  
14 AF.  
15  
16  
17

18  
19 The most highly cited trial comparing beta-blockers and digoxin for rate-control in chronic AF was  
20 an open-label two-week crossover study of 5 drug regimes in 12 patients.<sup>42</sup> Peak heart-rate after  
21 exercise was significantly higher in those taking digoxin compared to beta-blockers but there  
22 were no differences in exercise duration. In a trial of 42 patients, rate-control was improved with  
23 combination beta-blocker/digoxin therapy compared to digoxin alone, however there were  
24 similarly no differences in exercise capacity.<sup>43</sup> Systematic review of other small randomised  
25 studies identify no difference in exercise tolerance with beta-blockers, despite a lowering of heart-  
26 rate.<sup>44</sup> From observational data, such as the Atrial Fibrillation Follow-up Investigation of Rhythm  
27 Management (AFFIRM) study, more cardiac and non-cardiac adverse effects have been noted  
28 with beta-blockers than digoxin (n=67 vs. n=38).<sup>28</sup> In a 3-week crossover study of 60  
29 participants, 10% withdrew during beta-blocker therapy due to adverse events.<sup>45</sup> Those in the  
30 beta-blocker group had a reduction in exercise capacity on cardio-pulmonary testing and a  
31 significant increase in B-type natriuretic peptide (BNP, a marker of ventricular strain) compared to  
32 patients treated with calcium-channel blockers.<sup>46</sup>  
33  
34  
35  
36  
37  
38  
39

40 Only a single RCT has been published comparing digoxin and beta-blockers in patients with AF  
41 and heart failure (mean LVEF 24%, n=47).<sup>47</sup> Although there was a marginally-significant  
42 improvement in LVEF with carvedilol/digoxin versus placebo/digoxin, blinded withdrawal of  
43 digoxin then led to a deterioration in LVEF, accompanied by an increase in BNP. There was no  
44 difference in the number of heart-rate pauses >3 seconds or in daytime/exercise heart-rate  
45 comparing the two therapies alone.  
46  
47  
48

49 Digoxin itself has been associated with an increased mortality in observational cohorts of AF  
50 patients<sup>48</sup>, however careful adjustment of baseline differences reject a true excess in adverse  
51 outcomes.<sup>49-51</sup> In a detailed systematic review of all studies published on digoxin, we identified  
52 that confounding was the main reason that digoxin was associated with increased mortality in  
53 observational studies, and confirmed a neutral association in RCTs (risk ratio 0.99, 95% CI 0.93  
54 to 1.05).<sup>6</sup> Lower rates of hospitalisation have been noted with digoxin therapy, independent of  
55 the type of heart failure<sup>52</sup>, however the lack of randomised data versus placebo (despite  
56 widespread clinical use) makes true comparison difficult. Small RCTs comparing CCB with  
57 digoxin have been inconsistent; two have identified lower heart-rates with CCB but no significant  
58 difference in exercise capacity<sup>42, 43</sup>, one demonstrated higher post-exercise cardiac output after  
59  
60

1  
2  
3 digoxin<sup>53</sup> and another showed improved exercise duration and QoL with CCB.<sup>54</sup> These results  
4 highlight the need for randomised data with appropriately-defined outcomes to accurately identify  
5 the benefits and risks of common therapies in patients with AF.  
6  
7

8 An example where RCT data have impacted on clinical practice is the Rate Control Efficacy in  
9 Permanent Atrial Fibrillation (RACE II) trial. This study challenged conventional wisdom that  
10 stricter control of heart-rate would allow time for diastolic filling and improve haemodynamics. In  
11 summary, 614 patients with permanent AF were randomised to strict or lenient rate-control and  
12 followed for 2-3 years.<sup>55</sup> There was no significant difference in the cumulative incidence of the  
13 composite primary outcome; 14.9% in the strict-control arm and 12.9% in the lenient-control  
14 group. There were also no differences in symptoms, New York Heart Association (NYHA) class  
15 or hospitalisations<sup>55, 56</sup>, no interaction with baseline heart failure<sup>57</sup>, and those participants  
16 achieving strict rate-control required more clinic visits and higher doses of medical therapy.<sup>58</sup>  
17 Current guidelines therefore suggest that lenient rate-control is acceptable, except for patients  
18 with adverse symptoms or clinical deterioration.<sup>1</sup> Whilst this study provides important data on the  
19 intensity of rate-control in AF, the more clinically-relevant questions of how to initiate therapy and  
20 the choice of optimal agents for individual patients remain unanswered.  
21  
22  
23  
24  
25  
26  
27

## 28 2.5 Patient Wellbeing

29  
30 Patient-reported outcomes are any report of a patient's health status (for example QoL) that is  
31 derived directly from the patient, without interpretation by a clinician.<sup>59</sup> There is limited data on  
32 the effect of pharmacological rate-control therapy on QoL and no comparative data assessing the  
33 benefit of different strategies.<sup>22, 60</sup> Rate-control has been associated with improved QoL scores in  
34 trials assessing rate versus rhythm-control.<sup>61, 62</sup> In the PIAF study, over 50% of participants  
35 randomised to calcium-channel blockers reported an improvement in health with significant  
36 benefits in the physical aspects of the SF-36.<sup>63</sup> A number of smaller studies have shown  
37 inconsistent effects on QoL in AF, although the data is limited by inclusion of patients with  
38 paroxysmal AF, a focus on heart rate and the use of a variety of QoL tools.  
39  
40  
41  
42  
43

44 Current QoL questionnaires can be divided into disease-specific evaluations or generic health  
45 assessments (such as the Short Form Health Survey SF-36<sup>64</sup> or the EuroQol EQ-5D<sup>65, 66</sup>).  
46 However there is a distinct lack of knowledge regarding the mechanisms that underpin AF-related  
47 symptoms, the responsiveness of QoL questionnaires and their validity.<sup>60</sup> The Atrial Fibrillation  
48 Effect on QualiTy-of-life (AFEQT) questionnaire was designed to address these disparities by  
49 using more robust methods.<sup>67</sup> Although there is limited clinical application to-date, AFEQT has  
50 demonstrated sensitivity to clinical change.<sup>68</sup> An important objective of the research is to  
51 ascertain appropriate and responsive QoL tools for this population, as well as determine the  
52 acceptability and delivery of the questionnaires to patients.  
53  
54  
55  
56  
57

## 58 2.6 Rationale for the RATE-AF Trial

59 Rate-control is an integral part of management in all AF patients but hardly any controlled trial  
60 evidence exists to guide the choice of agents. We have shown that neither beta-blockers nor

1  
2  
3 digoxin has an impact on mortality in AF patients, even with concomitant heart failure, which  
4 highlights the need to determine treatment effects on quality of life and cardiac function.  
5  
6

### 7 8 **3 Trial Design and Objectives**

9  
10 **RATE-AF** is Prospective, Randomised Open-label Blinded Endpoint (PROBE) clinical trial  
11 comparing the use of digoxin and beta-blockers as initial rate control therapy.  
12  
13

14  
15 In this section, we discuss the trial design and study objectives. Detailed outcome measures are  
16 listed in **Section 12**.  
17

#### 18 19 **Justification for a PROBE rather than a Double Blind Trial Design**

20  
21 Although a double blind design would be the most robust trial design with respect to bias, it would  
22 not be ethical to do so in this scenario as clinicians would feel the need to add therapy according  
23 to heart rate. In addition, the RATE-AF Trial aims to test a strategy of initial care. PROBE trial  
24 design maintains the benefits associated with a strict randomisation procedure, while the blinded  
25 end points help to eliminate bias.  
26  
27

28  
29 The trial design aims for a pragmatic 'all-comers' approach, applicable to those seen in clinical  
30 practice to allow transfer of the findings to routine clinical management of patients with  
31 permanent AF.  
32  
33

#### 34 35 **Assessment and Management of Risk**

36  
37 This trial is categorised by the Medicines and Healthcare products Regulatory Agency (MHRA)  
38 as:  
39

##### 40 41 **Type A = No higher than the risk of standard medical care**

42  
43 The assessment and management of risk is detailed in the separate **RATE-AF** Risk Assessment  
44 document. An on-going evaluation of risk will continue throughout the recruitment period.  
45  
46

### 47 48 **3.1 Hypothesis**

#### 49 50 **Null Hypothesis for primary outcome:**

51  
52 No difference in patient-reported quality of life (measured using the physical functioning domain  
53 of the SF36 questionnaire) when comparing a strategy of digoxin versus beta-blocker therapy for  
54 initial rate control in patients with permanent AF.  
55  
56

#### 57 58 **Alternative Hypothesis:**

59  
60 Use of digoxin or beta-blocker therapy as initial rate control in patients with permanent AF is  
superior based on patient reported quality of life (measured using the physical functioning domain  
of the SF36 questionnaire).

### 3.2 Primary objective

- Patient-reported quality of life (QoL), with a predefined focus on physical well-being using the SF-36 physical component summary at six months.

### 3.3 Secondary objectives

- Generic and AF-specific patient-reported QoL using the SF-36 global and domain-specific scores, the AFEQT overall score and the EQ-5D-5L summary index and visual analogue scale at six and twelve months.
- Echocardiographic left-ventricular ejection fraction (LVEF) and diastolic function (E/e' and composite of diastolic indices) at twelve months.
- Functional assessment, including 6-minute walking distance achieved, change in European Heart Rhythm Association (EHRA) class and cognitive function at six and twelve months.
- Change in B-type natriuretic peptide (BNP) levels as a surrogate for total cardiac strain at six months.
- Change in heart rate from baseline and group comparison using 24-hour ambulatory ECG.

### 3.4 Feasibility objectives

- Successful methods for recruitment
- Key issues that affect retention of participants, such as convenience, compliance and cross-over (target of 85% study completion rate).
- Drug discontinuation rate and adverse reactions leading to drug discontinuation.
- Therapy-induced requirement for additional treatment (e.g. pacemaker implantation).
- Population-specific standard deviations and proportions to enable sample size calculation for a future trial.
- Assessment of cardiovascular outcomes including a composite of adverse clinical events (mortality, thromboembolic events, myocardial infarction and cardiovascular interventions).

### 3.5 Exploratory objectives

- Correlation of baseline measures, including QoL questionnaires and unblinded baseline investigations such as QoL, BNP, LVEF, E/e', EHRA, intracellular methods and heart rate.
- Impact of therapy on intracellular sodium and calcium concentration and cardiotonic steroid levels as biomarkers of cellular response at six and twelve months.



- Impact of combination therapy on outcomes, including comparison of bisoprolol/non-dihydropyridine calcium channel blocker (CCB) vs. bisoprolol/digoxin vs. digoxin/CCB vs. single therapies.
- Change in cognitive function at twelve months
- Qualitative research of patient-reported QoL using focus groups to explore patient acceptability, optimal delivery methods and responsiveness.
- Assessment of the validity and reproducibility of echocardiographic measures in patients with AF.
- Correlation of serum digoxin concentration with change in QoL and intracellular methods.
- Cost-consequence economic analysis from an NHS perspective.

## 4 Selection of Participants

Participants who potentially fulfil the inclusion criteria for this trial must have their eligibility confirmed by medically qualified personnel with access to and a full understanding of the potential participant's medical history. If eligibility has been assessed and documented by medically qualified personnel, then the process of obtaining informed consent may be delegated as appropriate and as documented on the **RATE-AF** Delegation and Signature Log.

### 4.1 Inclusion Criteria

- Adult patients aged 60 years or older
- Permanent AF, characterised (at time of randomisation) as a physician decision for rate-control with no plans for cardioversion, anti-arrhythmic medication, or ablation therapy
- Symptoms of breathlessness (New York Heart Association Class II or more)
- Able to provide written informed consent

### 4.2 Exclusion Criteria

- Established clinical indication for beta-blocker therapy, e.g. myocardial infarction in the last 6 months
- Known contraindications for therapy with beta-blockers or digoxin, e.g. a history of severe bronchospasm that would preclude use of beta-blockers, or known intolerance to these medications
- Baseline heart rate <60 bpm
- History of second or third-degree heart block
- Supraventricular arrhythmias associated with accessory conducting pathways (e.g. Wolff-Parkinson-White syndrome) or a history of ventricular tachycardia or fibrillation

- Planned pacemaker implantation (including cardiac resynchronisation therapy), pacemaker-dependent rhythm or history of atrioventricular node ablation
- Decompensated heart failure (evidenced by need for intravenous inotropes, vasodilators or diuretics) within 14 days prior to randomisation
- A current diagnosis of obstructive hypertrophic cardiomyopathy, myocarditis or constrictive pericarditis
- Received or on waiting list for heart transplantation
- Receiving renal replacement therapy
- Major surgery, including thoracic or cardiac surgery, within 3 months of randomisation
- Severe, concomitant non-cardiovascular disease (including malignancy) that is expected to reduce life expectancy

## 5 Informed Consent Process

It will be the responsibility of the Investigator to obtain written informed consent for each participant prior to performing any trial related procedure. If local practice allows, this responsibility may be delegated by the Principal Investigator, to a Research Nurse as captured on the Site Signature and Delegation Log. A Participant Information Leaflet (PIL) will be provided to facilitate this process. Investigators or delegate(s) will ensure that they adequately explain the aim, trial treatment, anticipated benefits and potential hazards of taking part in the trial to the participant. They will also stress that participation is voluntary and that the participant is free to refuse to take part and may withdraw from the trial at any time. The participant will be given adequate time to read the PIL and to discuss their participation with others outside of the site research team. The participant will be given the opportunity to ask questions.

If the participant expresses an interest in participating in the trial they will be asked to sign and date the latest version of the Informed Consent Form (ICF). The participant must give explicit consent for the regulatory authorities, members of the research team and representatives of the sponsor to be given direct access to the participant's medical records.

The Investigator or delegate(s) will then sign and date the form. A copy of the ICF will be given to the participant, a copy will be filed in the medical notes, and the original placed in the Investigator Site File (ISF). Once the participant is entered into the trial, the participant's unique trial identification number will be entered on the ICF maintained in the ISF. As part of the consent process, the participant will be asked to give explicit consent to their trial-related information being sent to the Trials Office at the University of Birmingham.

This trial will include **optional consent** to allow linkage to patient data available in NHS routine clinical datasets, including primary care data (e.g. Clinical Practice Research Datalink; CPRD, The Health Improvement Network; THIN, QResearch), secondary care data (Hospital Episode Statistics; HES) and mortality data from the Office of National Statistics (ONS) through The Health and Social Care Information Centre and other central UK NHS bodies. The consent will

1  
2  
3 also allow access to other new central UK NHS databases that will appear in the future. This will  
4 allow us to double check the main outcomes against routine data sources, and extend the follow-  
5 up of patients in the trial and collect long-term outcome and health resource usage data without  
6 needing further contact with the trial participants. This is important as it will link a trial of  
7 treatments that may become a clinical standard of care to long-term outcomes that are routinely  
8 collected in clinical data but which may be collected during the follow-up period of the trial.  
9  
10

11  
12 Details of the informed consent discussions will be recorded in the participant's medical notes.  
13 This will include date of discussion, the name of the trial, summary of discussion, version number  
14 of the PIL given to participant and version number of ICF signed and date consent received.  
15 Where consent is obtained on the same day that the trial related assessments are due to start, a  
16 note will be made in the medical notes as to what time the consent was obtained and what time  
17 the procedures started.  
18  
19  
20  
21

22 At each visit the participant's willingness to continue in the trial will be ascertained and  
23 documented in the medical notes. Throughout the trial the participant will have the opportunity to  
24 ask questions about the trial. Any new information that may be relevant to the participant's  
25 continued participation will be provided. Where new information becomes available which may  
26 affect the participants' decision to continue, participants will be given time to consider and if  
27 happy to continue will be re-consented. Re-consent will be documented in the medical notes.  
28 The participant's right to withdraw from the trial will remain.  
29  
30  
31  
32

33 Electronic copies of the PIL and ICF will be available from the Trials Office and will be presented  
34 on the headed paper of the local institution. Details of all participants approached about the trial  
35 will be recorded on the Participant Screening/Enrolment Log and with the participant's prior  
36 consent, their General Practitioner (GP) will also be informed that they are taking part in the trial.  
37  
38  
39  
40

## 41 **6 Enrolment and Randomisation**

42  
43 A flowchart of the recruitment process is shown in the Trial Schema (**Figure 1**) together with the  
44 schedule of investigation. **Section 9** gives more detailed information of trial procedures and  
45 assessments.  
46  
47  
48

49 In the majority, potentially eligible participants will be identified by their Cardiologist, usually  
50 following referral from their General Practitioner (GP), and provided with an ethically-approved  
51 patient information leaflet (PIL). The patient will then be invited to attend a baseline visit at the  
52 NIHR Wellcome Trust Clinical Research Facility (WTCRF) at Queen Elizabeth Hospital,  
53 Birmingham. Potentially eligible participants may also be identified from inpatient referrals; these  
54 patients will be provided with a PIL and invited to attend a baseline visit following the same  
55 procedure.  
56  
57  
58  
59

60 GP Practices in the Birmingham area may be asked to refer patients that present with AF, but are  
not on medication, to the RATE-AF Research Team at University Hospitals Birmingham (UHB).  
These patients will be given a one-page, ethics committee-approved trial summary and asked to

1  
2  
3 sign a contact details form to confirm that they are happy to be contacted by a member of the  
4 Research Team to arrange an appointment.  
5  
6

7 Prior to patients undertaking any trial-related procedures, informed consent will be obtained.  
8

9  
10 Details of all patients approached about the trial should be recorded on the **RATE-AF** Screening  
11 & Enrolment Log. This Log should be maintained within the Investigator Site File.  
12  
13

## 14 **6.1 Randomisation Procedures**

15  
16 After all eligibility criteria have been confirmed and informed consent has been received, the  
17 participants can be randomised into the **RATE-AF** trial.  
18  
19

20  
21 Participants will be randomised in a 1:1 ratio to either **Digoxin 62.5 – 250 µg od or Bisoprolol**  
22 **1.25 – 15 mg od**. The time between randomisation and commencement of trial therapy should  
23 be minimised (ideally <24 hours). Randomisation will be provided by a computer generated  
24 programme at the Birmingham Clinical Trials Unit (BCTU), using a minimisation algorithm to  
25 ensure balance between the arms with regard to important clinical variables, stratifying for  
26 baseline EHRA (class 1/2a and 2b/3/4) and gender.  
27  
28  
29

### 30 **Telephone and Online Randomisation**

31  
32 Participants can be randomised into the trial via a secure 24 hour internet based randomisation  
33 service (<https://www.trials.bham.ac.uk/RATEAF>) or by a telephone call to the BCTU (telephone  
34 number **0800 953 0274**). Telephone randomisations are available Monday-Friday, 09:00-17:00.  
35 For the secure internet randomisation, each site and each randomiser will be provided with a  
36 unique log-in username and password in order to access the online system. Online  
37 randomisation is available 24 hours a day, 7 days a week, apart from short periods of scheduled  
38 maintenance and occasional network problems.  
39  
40  
41  
42

43 Randomisation Forms will be provided to investigators and should be completed and used to  
44 collate the necessary information prior to randomisation. Once all eligibility criteria have been  
45 provided and confirmed, a Trial Number and treatment allocation be given and relevant parties  
46 notified, including the participant's GP.  
47  
48  
49

### 50 **Back-up Randomisation**

51  
52 If the internet based randomisation service is unavailable for an extended period of time, a back-  
53 up paper randomisation will also be available at the BCTU. The randomisation list will be  
54 produced using a random length block design. In this instance, investigators should ring the  
55 BCTU randomisation service (telephone number **0800 953 0274**).  
56  
57  
58  
59  
60

## 7 Trial Treatment

### 7.1 Treatment

The Investigational Medicinal Products (IMPs) for this trial are Digoxin and Bisoprolol.

At randomisation, participants will be allocated to open-label treatment with either Digoxin 62.5 – 250 µg od or Bisoprolol 1.25 – 15 mg od.

#### Digoxin

Digoxin is a cardiac glycoside derived from the foxglove plant. The cardiac effects of digoxin therapy are summarised by:

- Positive inotropic effects: increased intracellular calcium due to direct inhibition of sodium-potassium adenosine triphosphatase (Na/K-ATPase)
- Negative chronotropic effects: decreased conduction velocity through the atrioventricular node, an increase in the effective refractory period and an increase in vagal activity leading to sinus node depression.

Clinically, digoxin is commonly prescribed in two conditions, heart failure and AF.

#### Bisoprolol

Bisoprolol fumarate is a highly beta-1 selective adrenoreceptor blocker first approved by the U.S. Food and Drug Administration in 1992. The cardiac effects of bisoprolol therapy are summarised by:

- Negative chronotropic effects: a reduction in resting and exercise heart rate due to prevention of norepinephrine and epinephrine from binding to the beta-receptor in cardiac conduction tissue.
- Negative (mild) inotropic effects: an initial fall in resting and exercise cardiac output with little observed change in stroke volume and only a small increase in right atrial pressure or pulmonary capillary wedge pressure.

Clinically, bisoprolol is commonly prescribed in a range of cardiology conditions, including post-myocardial infarction, heart failure and in patients with atrial tachyarrhythmia, including AF.

### 7.2 Treatment Supply and Storage

Due to the participant population and the fact that the trial closely aligns with standard care, trial medication may be dispensed from routine standard stock by both the pharmacy at the research site and community pharmacies local to the participant. Both treatments are used as per normal clinical practice therefore there is no additional requirement, above that of local policy, to monitor temperature during storage.

## Digoxin

Digoxin is available as an oral tablet in doses of 62.5, 125 and 250 µg or as an elixir (50 µg/mL). It is packaged in 28 or 500 tablet packs under the generic title digoxin and trade label Lanoxin.<sup>69</sup> Digoxin should be stored according to local policy.

## Bisoprolol

Bisoprolol is available as an oral tablet in doses of 1.25, 2.5, 3.75, 5.0, 7.5 and 10 mg. It is packaged as 28 tablets under the generic title bisoprolol fumarate and trade labels Cardicor and Emcor.<sup>69</sup> Bisoprolol should be stored according to local policy.

## 7.3 Dosing Schedule

### Digoxin

An advice sheet for the investigator is presented in **Appendix A**.

Trial maintenance doses will initially be 62.5 or 125 µg orally (at the clinician's discretion, taking into account age and renal function), with planned up-titration to 125/250 µg. The maximum trial dose will be 250 µg daily.

A single loading dose of four tablets (250 or 500 µg according to target maintenance dose) will be prescribed in digoxin-naïve participants. The clinician is permitted to omit the loading dose or prescribe a second, where necessary.

Unblinded serum digoxin concentrations will be assessed at visits 2 and 3, with results reported back to the relevant clinician(s). This process will assist in monitoring compliance, adjusting dosage in cases of low serum levels and avoiding toxicity.

### Bisoprolol

An advice sheet for the investigator is presented in **Appendix B**.

Trial starting doses will be 1.25 or 2.5 or 5 mg (at the clinician's discretion), with planned up-titration to 10 mg in increments of 1.25 or 2.5 mg. The maximum trial dose will be 15 mg daily. No loading dose is required.

Plasma concentrations have not shown to be associated with toxicity and are not part of standard clinical practice.

## 7.4 Drug Interactions and Contraindications

### Digoxin

Following oral administration of digoxin, approximately 60–85% of the dose is usually absorbed, mainly from the small intestine. The onset of action is 0.5-2 hours and maximal effects occur in

1  
2  
3 2-6 hours. Digoxin has a large volume of distribution and approximately 20-30% of digoxin in  
4 blood is bound to plasma proteins. Metabolism is minimal but variable, with the majority of drug  
5 excreted unchanged in the urine by glomerular filtration and tubular secretion. With normal renal  
6 function, the elimination half-life is 34-44 hours which is prolonged in patients with renal failure by  
7 two to threefold. Dose adjustment is unnecessary in patients with hepatic impairment.  
8 Therapeutic plasma concentrations of digoxin have been described as 0.5-2.0 ng/mL.<sup>70</sup> In  
9 digoxin-naïve patients with normal renal function, approximately seven days are required to reach  
10 steady-state therapeutic concentrations if a loading dose is omitted. As such, the majority of  
11 clinicians prescribe one or two loading doses, totalling 500 to 1000 µg over 24 hours.  
12  
13  
14

15  
16 Caution is recommended in patients with electrolyte disturbance (due to increased risk of toxicity)  
17 and reduced doses are recommended in patients with renal impairment. There are no concerns  
18 in pregnancy or with breast-feeding, although dose adjustment may be required.  
19  
20  
21

22 Contraindications for digoxin therapy include heart block, accessory pathway supraventricular  
23 tachycardia and a current diagnosis of obstructive hypertrophic cardiomyopathy, myocarditis or  
24 constrictive pericarditis.  
25  
26

27 Digoxin has been associated with a number of adverse effects, although data from randomised  
28 trials show little difference in comparison to placebo, apart from cases of toxicity (2% versus 0.9%  
29 respectively in the DIG trial of patients with HF)<sup>71</sup>. The most common side effects are  
30 gastrointestinal upset, dizziness, blurred vision, headache and rash. In toxic states (serum levels  
31 >2 ng/mL), digoxin is pro-arrhythmic and can aggravate heart failure, particularly with co-existent  
32 hypokalaemia. In cases of overdose, repeated early doses of activated charcoal may be given to  
33 reduce absorption and in severe toxicity, digoxin-specific antibody fragments are available as an  
34 intravenous infusion.  
35  
36  
37  
38  
39

40 In rigorous assessment, drug interactions with digoxin have proved inconsistent.<sup>72</sup> Serum digoxin  
41 concentrations are increased by amiodarone, dronedarone, propafenone and quinidine but  
42 increased bioavailability with CCB and certain antibiotics (such as erythromycin and tetracycline)  
43 only occur in selected patients. The risk of toxicity increases with drugs that cause electrolyte  
44 disturbances, such as thiazide and loop diuretics.  
45  
46  
47  
48

## 49 **Bisoprolol**

50 Following oral administration of digoxin, the absolute bioavailability is approximately 80%, first  
51 pass metabolism of 20% and 30% protein binding. Peak plasma concentrations occur within 2-4  
52 hours, the elimination half-life is 9-12 hours and steady state is attained within 5 days.  
53 Elimination occurs equally by renal and non-renal pathways with about 50% of the dose  
54 remaining unchanged in the urine.  
55  
56  
57

58 Caution is recommended in patients with first-degree heart block, portal hypertension, diabetes, a  
59 history of obstructive airways disease, myasthenia gravis, a history of hypersensitivity and  
60 psoriasis, although many cardiologists use beta-blockers frequently in these groups with  
appropriate supervision. In pregnancy, beta-blockers may cause intra-uterine growth restriction,

1  
2  
3 neonatal hypoglycaemia, and bradycardia (although as above, these agents are frequently used  
4 in pregnancy). There is a theoretical risk of toxicity in breast feeding, although the amount  
5 present in milk is likely too small to affect infants. Abrupt withdrawal should be avoided,  
6 especially in cases of ischaemic heart disease. Up-titration should be more cautious in patients  
7 with renal or hepatic impairment.  
8  
9

10  
11 Contraindications for bisoprolol therapy include cardiogenic shock, overt cardiac failure, second  
12 or third degree heart block, marked sinus bradycardia and severe peripheral arterial disease.  
13  
14

15 Bisoprolol has been associated with a wide variety of adverse effects although data from RCTs  
16 suggest similar discontinuation rates compare to placebo.<sup>5, 73</sup> The most common adverse  
17 symptoms are lethargy, headache, peripheral oedema, upper respiratory tract symptoms,  
18 gastrointestinal upset and dizziness. In cases of overdose, bradycardia, hypotension, congestive  
19 heart failure, bronchospasm and hypoglycaemia may be expected, with treatment directed to  
20 supportive methods and atropine, fluids, glucagon or diuretics as required.  
21  
22  
23

24  
25 Pharmacokinetic interactions with beta-blockers have not shown to be clinically significant. Drugs  
26 that reduce absorption include aluminium salts and cholestyramine, whilst metabolism can be  
27 increased by barbiturates and rifampicin and decreased with cimetidine, erythromycin,  
28 flvoxamine, and hydralazine.  
29  
30

### 31 **7.5 Accountability Procedures and Labelling**

32  
33  
34 Through the risk-adapted approach, a full risk assessment of the **RATE-AF** trial has been  
35 conducted including the drug accountability requirements. The IMPs will be used within their  
36 authorisations, prescribed on an NHS prescription and dispensed by pharmacy from standard  
37 stock. The risk assessment has determined that a normal dispensing label is appropriate and an  
38 additional clinical trial label is not necessary (as covered by Regulation 46 (2) of SI 2004/1031).  
39 Drug accountability will be according to standard practice for NHS prescriptions. Details of how  
40 compliance will be assessed can be found in **Section 7.7**.  
41  
42  
43  
44

### 45 **7.6 Treatment Modification**

46  
47  
48 Patients that withdraw from medication for any reason will do so under strict clinical supervision.  
49  
50

51 The trial is designed to assess the impact of **initial** impact of rate control therapy; it is expected  
52 that treatments will modify during the trial period (in particular, the addition of therapy to attain  
53 heart rate targets). Patients will not be withdrawn from the trial if they commence therapy from  
54 the other arm of the trial due to any absolute or relative clinical indications (for example, patients  
55 in the digoxin arm starting beta-blockers due to incident myocardial infarction, or heart failure with  
56 reduced LVEF).  
57  
58  
59  
60



## 7.7 Assessment of Compliance

We will ask participants about compliance with their trial medication at each follow-up visit and this will be documented in the CRFs. It may also be clinically evident from the heart rate check, performed as part of all visits, whether or not the patient has been compliant with their trial medication.

In addition, patients that are randomised to the digoxin arm will have a serum digoxin sample taken as part of Visit 2 (month 6) and Visit 3 (month 12) follow-ups. The results will indicate whether the patient has been compliant with their trial medication.

## 8 Trial Procedures and Schedule of Assessments

### 8.1 Baseline Visit

The baseline visit will occur as soon as possible after screening and will involve the following procedures (see **Section 9** for procedure details):

- Verify inclusion/exclusion criteria.
- Obtain written informed consent from the potential participant.
- Randomise the patient via telephone or the secure web-based system as outlined in **Section 6**
- Administer QoL and functional capacity questionnaires.
- Review recent blood results (within 6 months of Baseline Visit)
  - Assessing renal function to aid in dose assignment and serum potassium level as part of standard clinical care.
- Document the use of oral anticoagulation and arrange appropriate prescription for patients not on therapy according to clinical guidelines. If the participant is already receiving vitamin-K antagonists (VKA), recent INR results will be documented.
- Record results of physical examinations.
- Collect blood samples for baseline blood tests and biomarker analysis.
- Complete case report form (CRF)
- Perform a 12-lead electrocardiogram.
- Supervise a 6-minute walk test, recording distance walked and peak heart rate.
- Arrange the baseline echocardiogram; images will be delivered to the echocardiographic core laboratory for blinded reporting.
- Discuss the randomised allocation with the participant including schedule for drug therapy and up-titration.

Participants will be followed up by telephone call two weeks after the Baseline Visit to ensure they have commenced trial medication.

## 8.2 Up-Titration Visits

For the majority of participants, two up-titration visits will be planned to supervise the appropriate use of medications as per the up-titration schedule (see **Appendices A and B**). Additional up-titration visits, as required, are acceptable in order to attain a heart rate at rest of  $\leq 100$ bpm.

Up-titration visits will involve the following procedures:

- Record adverse events as reported by the participant or observed by the investigator.
- Review of medications and plan for trial drug up-titration
- Assessment of compliance
- Symptom-directed clinical examination
- Vital signs, including heart rate and blood pressure
- Administer QoL and functional capacity questionnaires (last up-titration visit only).
- Organise a 24-hour ambulatory ECG once up-titration completed (results to be forwarded to the clinician).

## 8.3 Visit 2, Month 6

Visit 2 will occur at an interval of six months ( $\pm$  four weeks) after the Baseline Visit and involve the following procedures:

- Administer QoL and functional capacity questionnaires.
- Record adverse events as reported by the participant or observed by the investigator.
- Confirm current rate control therapy (including dosage) and check concomitant medications.
- Assessment of compliance.
- Collect blood samples for biomarker analysis.
- Collect blood sample for serum digoxin concentration, potassium and creatinine as part of standard clinical care.
- Record time in therapeutic range for patients on anticoagulation with vitamin-K antagonists and compliance in patients receiving non-VKA oral anticoagulants.
- Obtain a twelve lead ECG.
- Record the results of physical examinations and vital signs.
- Supervise a 6-minute walk test, recording distance walked and peak heart rate.
- Complete other CRF requirements.
- If an echocardiogram has been performed for clinical reasons since the previous visit, images will be retrieved and sent to the core echocardiographic laboratory.

- Confirm appointment date for Visit 3.

#### 8.4 Visit 3, Month 12 (Final Trial Assessment)

Visit 3 will occur at an interval of 12 months ( $\pm$  four weeks) after the Baseline Visit and involve the following procedures:

- Administer QoL and functional capacity questionnaires.
- Record adverse events as reported by the participant or observed by the investigator.
- Confirm current rate control therapy (including dosage) and check concomitant medications.
- Assessment of compliance.
- Transthoracic echocardiography (as per **Section 9.6**), with images delivered to the echocardiographic core laboratory for blinded reporting.
- Collect blood sample for serum digoxin concentration, potassium and creatinine as part of standard clinical care.
- Record time in therapeutic range for patients on anticoagulation with vitamin-K antagonists and compliance in patients receiving non-VKA oral anticoagulants.
- Obtain a twelve lead ECG.
- Record the results of physical examinations and vital signs.
- Supervise a 6-minute walk test, recording distance walked and peak heart rate.
- Complete other CRF requirements.
- If an echocardiogram has been performed for clinical reasons since the previous visit, images will be retrieved and sent to the core echocardiographic laboratory.
- Complete the end of trial standardised letter to the GP and clinician explaining that the participant has reached the end of the trial protocol and is no longer bound by their allocated medication strategy. Advise that all participants are invited for continued follow up and long term clinical outcome assessment.
- Provide final instructions to participant (e.g. follow-up of ongoing adverse events).

#### 8.5 Investigator-blinded Endpoints

Investigator-blinded endpoints (PROMs, echocardiography and biomarkers) will be assessed by the core laboratory, identified only by the trial number. Ambulatory ECG and serum digoxin level will remain unblinded and results delivered to the responsible clinician.

#### 8.6 Long Term Follow-Up

In patients who have agreed to NHS data linkage, a follow-up CRF will be completed. The CRF will capture items that include, but are not limited to death, hospital admissions and

1  
2  
3 cardiovascular events. The planned interval for outcome assessment is 2 and 5 years post-  
4 enrolment.  
5  
6

## 7 **8.7 Withdrawal**

8  
9  
10 Participants may withdraw at any time during the main **RATE-AF** trial if they choose not to  
11 continue or if their clinical team feel that continued participation in the trial is inappropriate.  
12

13 An investigator may deem it necessary to withdraw a participant from the trial if:

- 14  
15 1) Any clinical adverse event, laboratory abnormality, or other medical condition or situation  
16 occurs such that continued participation in the trial would not be in the best interest of the  
17 participant.  
18
- 19  
20 2) The participant meets an exclusion criterion (either newly developed or not previously  
21 recognised) that precludes further trial participation.  
22

23 Full details of the reason(s) for withdrawal should be recorded on the Case Report Forms (CRFs)  
24 if healthcare professional-initiated, otherwise a simple statement reflecting patient preference will  
25 suffice.  
26

27 Clear distinction will be made between withdrawals from trial treatments whilst allowing further  
28 follow-up, and any participants who refuse any follow-up. If a participant explicitly withdraws  
29 consent to any further data recording, then this decision will be respected. All communications  
30 surrounding the withdrawal will be noted in the participant's records and no further data will be  
31 collected for the participant.  
32  
33

34  
35 In the case of missing echocardiographic outcome data due to withdrawal (but with consent for  
36 ongoing follow-up) or death, results of recent clinical echocardiography will be retrieved. The  
37 participant's permission to obtain such data will be obtained and documented during the consent  
38 process. As with all trial echocardiograms, the scan will be reported by the core  
39 echocardiographic laboratory. With respect to patient-reported outcomes, QoL questionnaires  
40 will be mailed to participants who withdraw from trial treatment but consent to ongoing follow up.  
41 Those patients where adverse symptoms were related to withdrawal will be invited to a focus  
42 group for further discussion.  
43  
44  
45  
46  
47

## 48 **8.8 Trial Duration**

49  
50  
51 Patients will be on trial medication for 12 months and will be followed-up, during this period  
52 according to the protocol. At the end of the 12 months, the participants may, as determined by  
53 their clinician, continue on medication but it will not be considered part of the trial intervention.  
54 The trial will cease when the 12-month follow-up has been completed for the last participant  
55 recruited.  
56  
57  
58  
59  
60

Table 1: Schedule of Assessments

| Procedures                          |                  | Baseline Visit | Up-titration Visits<br>(Day 14 to 60) | Visit 2, Month 6<br>(± 4 weeks) | Visit 3, Month 12<br>(± 4 weeks) |
|-------------------------------------|------------------|----------------|---------------------------------------|---------------------------------|----------------------------------|
| Assessment of eligibility criteria  |                  | X              |                                       |                                 |                                  |
| Informed consent taken              |                  | X              |                                       |                                 |                                  |
| Review of medical history           |                  | X              |                                       |                                 |                                  |
| Review of medications               |                  | X              | X                                     | X                               | X                                |
| Physical exam                       | Complete         | X              |                                       |                                 |                                  |
|                                     | Symptom-directed |                | X                                     | X                               | X                                |
|                                     | Vital signs      | X              | X                                     | X                               | X                                |
| Quality of life assessment          |                  | X              | (X)                                   | X                               | X                                |
| Functional and cognitive assessment |                  | X              |                                       | X                               | X                                |
| Transthoracic echocardiogram        |                  | X              |                                       |                                 | X                                |
| 12-lead electrocardiogram           |                  | X              |                                       | X                               | X                                |
| 6-minute walk test                  |                  | X              |                                       | X                               | X                                |
| 24-hour ambulatory ECG              |                  |                | X                                     | (X)                             |                                  |
| Clinical labs                       | Chemistry        | X              |                                       | X                               | X                                |
|                                     | Haematology      | X              |                                       | X                               | X                                |
|                                     | Serum digoxin    |                |                                       | (X)                             | (X)                              |
| Trial labs                          | BNP              | X              |                                       | X                               |                                  |
|                                     | Stored sample    | X              |                                       | X                               |                                  |
| Assessment of compliance            |                  |                | X                                     | X                               | X                                |
| Assessment of adverse events        |                  |                | X                                     | X                               | X                                |

Parentheses denote where a procedure is dependent on the stage of participants within the trial.

## 9 Trial Procedures

### 9.1 Procedures Defined as Standard Clinical Care

The following assessments are considered part of the standard clinical care of AF patients receiving heart rate control therapy and will occur at all trial visits:

- Blood tests for haemoglobin, serum creatinine, potassium and serum digoxin concentration; these will be obtained by the research nurse and submitted to the site-specific hospital laboratory as per local guidelines and SOPs, ensuring that all specimens are accurately labelled and handled appropriately. In the case of results requiring urgent action, local policies will be followed which may include the participant visiting their GP, local hospital or investigator. In all cases, appropriate trial documentation will be completed.
- A 12-lead ECG; these will be completed by appropriately trained local staff.

### 9.2 Medical History

Medical history will be obtained by interview and from medical records (physical and electronic) at the Baseline Visit comprising:

- Cardiovascular history, including prior ischaemic coronary disease, interventions and surgery, history of hypertension, heart failure or hyperlipidaemia, stroke or transient ischaemic attack, pulmonary embolus/deep vein thrombosis and peripheral vascular disease.
- AF history, including year of diagnosis, previous cardioversions, previous ablation therapy and anti-arrhythmic drug history.
- Pacemaker history, including date and reason for implantation, type of device (single-chamber, dual-chamber, biventricular, implanted defibrillator) and dependency.
- Non-cardiac history, including diabetes mellitus, airways disease (asthma/COPD), renal impairment, bleeding history and other major co-morbidities.
- Social and demographic history, including smoking status (current/ex/never), race (Caucasian/Indian subcontinent/Asian/African/other) and physical activity using the International Physical Activity Questionnaire (short form).

### 9.3 Medication History

Medications history will be assessed according to the categories below and include current dosage. Except for anticoagulation, antiarrhythmic and rate control therapies, only current medications will be included.

- Anticoagulation therapy (vitamin-K antagonists and novel agents), including past use, INR results and time in therapeutic range.
- Antiarrhythmic therapy, including past use.

- Rate control therapy (beta-blockers, digoxin, CCB), including past use.
- Antiplatelet therapy.
- Angiotensin-converting enzyme inhibitors or angiotensin receptor blockers.
- Aldosterone antagonists.
- Diuretics (loop, thiazide, potassium-sparing, others).
- Nitrates.
- Other anti-hypertensive/anti-anginal therapy.
- Statins.
- Other lipid-lowering medication.
- Diabetic medication and insulin.
- Asthma/COPD medication (including inhalers).
- Non-steroidal anti-inflammatory agents.

## 9.4 Physical Examination

Physical and vital signs will be assessed at all up-titration and trial visits. In most cases, a targeted physical examination will be performed, comprising of cardiovascular elements as summarised below:

- Heart rate (manual palpation at radial artery and apex).
- Heart sounds.
- Lung auscultation.
- Assessment of jugular venous pressure and/or peripheral oedema.
- Other focused examinations according to symptoms and complaints.
- Blood pressure (two measurements at the right brachial in a seated position preferred, using a validated oscillometric device).
- Height (Baseline Visit only), weight (all listed visits) and waist circumference (Baseline Visit; defined as the narrowest point between ribs and hips when viewed from the front after exhaling to the nearest centimetre).

## 9.5 Patient Reported Outcomes

### 9.5.1 Choice of Outcomes and Qualitative Research

A systematic review (according to and in collaboration with the COnsensus-based Standards for the selection of health Measurement Instruments, COSMIN<sup>74</sup>) is underway to evaluate PROMs in AF, with a focus on psychometric properties including internal consistency, reliability, and measurement error. Additional assessment and practical evaluation of PROMs will follow published guidance<sup>75, 76</sup>, complementing qualitative research using patient focus groups, surveys

1  
2  
3 and directed interviews guided by the PROMs and qualitative research centres at the University  
4 of Birmingham.<sup>77</sup>  
5  
6

7 Instruments for assessment will be selected on the basis of overall validity, preferably in this  
8 patient population but including other groups where data are limited. Patient focus groups will  
9 allow exploration of patient perspectives on appropriate instruments that adequately reflect the  
10 experience of living with AF.<sup>78</sup> They will also allow comparison of QoL questionnaires that  
11 adequately summarise patient-prioritised components of their health and well-being. Additional  
12 focus groups and individual interviews will occur at interim and final follow-up during the trial.  
13 These aim to understand the patient experience of trial participation and processes, including the  
14 ease of completion of QoL questionnaires, relevance, reasons for non-completion and other  
15 feasibility issues that emerge during the trial e.g. non-compliance and recruitment, with reference  
16 to core outcome sets for this population.<sup>79</sup> A patient and public involvement (PPI) panel will  
17 contribute to all stages in the focus group process.<sup>80</sup>  
18  
19  
20  
21  
22

23 This protocol was developed in accordance with the Standard Protocol Items for Randomized  
24 Trials [SPIRIT] statement<sup>81</sup>, and the latest PROM-specific guidance from the International Society  
25 for Quality of Life Research (ISOQOL) Best Practice taskforce.<sup>77, 82, 83</sup>  
26  
27  
28  
29

### 30 **9.5.2 Data Collection for PROMs**

31 PROMs will be assessed at all main visits (Baseline, 2 and 3) and at the participants final up-  
32 titration visit (if applicable). The QoL tools used will be EQ-5D-5L, SF-36 and AFEQT. To avoid  
33 introducing co-intervention bias, all QoL data will be kept confidential and will not be used to  
34 inform clinical care.<sup>84</sup> Patients will be advised of this in the patient information sheet. PROMs will  
35 be collected at the start of each visit, before other trial procedures. In cases where the visit  
36 coincides with a clinician review, questionnaires should be completed in advance. The feasibility  
37 of using an online data collection tool will be explored, administered by trained research nurses  
38 and according to good-practice guidelines.<sup>85</sup> We will use this trial to perform an initial small-group  
39 assessment of electronic PROMs-equivalence to inform a future clinical event trial.  
40  
41  
42  
43  
44

45 Qualitative research will be performed using a focus group of 10 volunteer patients enrolled at the  
46 start of the trial (5 in each randomised group). The focus group will meet after up-titration and  
47 then at 6 and 12 months. Detailed methods will be established before the first meeting, in  
48 collaboration with the University of Birmingham Qualitative Research Group.  
49  
50  
51

52 All staff will receive training in QoL collection, with specific guidance on reducing introduced bias,  
53 minimising missing data and coaching participants to use the QoL software. Levels of missing  
54 PROMs data will be monitored. The site personnel responsible for collection of patient reported  
55 outcomes will be the Research Nurse under the supervision of the Principal Investigator.  
56  
57  
58  
59  
60



### 9.5.3 Outcome Appraisal

Each QoL tool will be scored according to their published requirements ([www.euroqol.org](http://www.euroqol.org); [www.sf-36.org](http://www.sf-36.org); [www.afect.org](http://www.afect.org)), using total and sub-category scores where appropriate.

To avoid dilution of effect over time, the primary analysis will be at six months (adjusting for baseline QoL and stratification variables). We have predefined a focus on physical well-being, which we hypothesize are where the greatest treatment effects will be observed, but will explore all aspects of QoL. Exploratory analysis of medication effects over the 12-month period will also be analysed and remain clinically important, as little data currently exists on the longer-term profile of QoL in AF.

Qualitative research outcomes will focus on the clinical responsiveness of the QoL instruments. The findings of the COSMIN systematic report will determine these outcomes and their relevant appraisal.

The RATE-AF trial will allow us to gain an initial understanding and framework of the patient experience of AF. We aim to begin the process of determining appropriate and responsive PROMs for AF patients and the optimum methods for delivery into a subsequent large-scale clinical trial.

## 9.6 Transthoracic Echocardiography

Echocardiography will be performed at Visits 1 and 3 and focus on systolic left-ventricular (LV) function, diastolic function and left-atrial assessment. Images will be obtained by an accredited echocardiographer. All trial echocardiograms will be labelled with the Trial Number and pseudoanonymised patient data, with specific instruction that the echocardiographer will remain blinded to the treatment assignment. All images will be archived to the core echocardiographic laboratory, with a copy retained in the site file.

### 9.6.1 Reproducibility and Validity of Measurements

Inter-observer and intra-observer variability in measurement will be assessed by comparing results of the stated methods discussed below across the cardiac cycle. To evaluate the minimum number of repeat measurements required that maintains clinical utility, reproducibility of single measurements will be compared to averages of 3/5/10 beats. This will also include the reliability of using an 'index beat' with a cycle length equivalent to a heart rate of 70-80 beats per minute, or with similar preceding and pre-preceding RR intervals.

### 9.6.2 Systolic LV Function

Systolic LV function will be determined by the following methods:

- Two-dimensional biplane Simpson's method utilising the simultaneous multi-planar approach to obtain LVEF in a single heartbeat (four and two-chamber views). In each

view, LV end-diastolic and end-systolic volumes (LVEDV, LVESV) are computed, with LVEF calculated as  $(LVEDV - LVESV) / LVEDV$ . Two-dimensional echocardiography has excellent spatial resolution but is limited by potential foreshortening of the ventricular apex and drop-out of the endocardial border.

- Standard Simpson's biplane method with four and two-chamber volumes obtained from separate heartbeats. This is the conventional method in current clinical use but is limited by varying RR intervals in AF.
- Fractional shortening on M-mode along the minor-axis of the left-ventricle (parasternal long-axis), calculated by the formula:  $(LV \text{ internal dimension in diastole} - LV \text{ internal dimension in systole}) / LV \text{ internal dimension in diastole}$ . M-mode measurements are reproducible and easy to perform with excellent temporal resolution, but are limited in cases of regional wall motion abnormalities and in patients where the true minor-axis is difficult to visualise.
- Both automated endocardial tracking and speckle-tracking analysis will be utilised (where available) by the echocardiographic core laboratory. Multiple planes will be obtained (four-chamber, two-chamber and short-axis mid-ventricle views). These methods have the advantage of reducing operator time and are angle-independent, but rely on good ultrasound windowing. Global longitudinal systolic strain using 2D speckle-tracking has recently been proposed as an important marker for adverse cardiovascular outcomes in AF.<sup>86</sup>
- Three-dimensional full-volume analyses of LV function, with single-beat analysis where feasible. This method has the advantage of not relying on geometric assumptions and allows the acquisition of full volume data within a single heartbeat. It correlates well with gold standard methods such as cardiac magnetic resonance imaging, but relies on adequate ultrasound windowing.
- Peak S-wave on tissue Doppler imaging (TDI) of the mitral valve annular sub-endocardium. This method has good correlation with LVEF across a wide range of function and is obtainable in patients with poor acoustic windows, but is limited in cases of regional wall motion abnormality.

Where poor quality acoustic windows limit accurate assessment of LV function, use of an intravenous contrast agent is recommended in participants without known allergy.

### 9.6.3 Diastolic LV Function

Diastolic LV function will be determined using the following methods (in all cases repeated over 3-5 cardiac cycles):

- Mitral inflow pulse-wave Doppler peak E velocity and deceleration time (DT).
- Mitral annular TDI to calculate septal E', lateral E' and the individual and averaged E/E' ratios.
- LV outflow tract pulse-wave Doppler to calculate isovolumic relaxation time (IVRT).

- Pulmonary vein pulse-wave Doppler to calculate peak systolic (where present) and diastolic velocities, ratio of peak velocities and DT of diastolic PV flow.
- Colour M-mode Doppler assessment of mitral flow propagation velocity (Vp) and ratio of E/Vp.

Overall diastolic function will be categorised according to the British Society of Echocardiography guidelines into normal function or mild/moderate/severe dysfunction based on a combination of the above variables. Individual parameters will also be categorised using cut-points identified from published studies.<sup>87</sup>

#### 9.6.4 Left Atrial Size and Function

Left atrial (LA) size will be measured in the anteroposterior (parasternal long-axis), transverse and longitudinal dimensions (apical 4-chamber). LA volumes will be calculated using the biplane area-length method:  $(0.85 \times 4\text{-chamber LA area} \times 2\text{-chamber LA area}) / \text{LA length}$ . The length is measured from the middle of the plane of the mitral annulus to the superior aspect of the LA (shortest of 4- and 2-chamber measurements). LA volumes will be indexed for body surface area.

Where suitable datasets are obtained, 3D LA volumetric analysis and assessment of LA function and strain will also be performed.

#### 9.6.5 Additional Echocardiography Parameters

The following parameters will be obtained in all participants:

- Tricuspid annular plane systolic excursion (TAPSE) for estimation of right ventricular function using pulse-wave Doppler.
- Where applicable, mitral regurgitation dP/dt.

### 9.7 Laboratory Evaluations

The use of biomarkers that can affect treatment decisions in AF is at an early stage of development.<sup>88</sup> The RATE-AF trial will allow us to collect and store blood samples on patients at baseline and follow-up, providing a unique biobank of AF patients receiving rate-control. In collaboration with the Human Biomaterials Resource Centre (HBRC) at the University of Birmingham, we will also isolate DNA for future work on predictors of response, including known polymorphisms of rate-responsiveness.<sup>89</sup>

Laboratories at each clinical site will process the standard laboratory investigations required as part of standard clinical care (see **Section 9.1**). Trial laboratory evaluations will be performed at the core laboratory and processed according to the guidelines in **Sections 9.7.1, 9.7.2 and 9.7.3**.

### 9.7.1 Laboratory Assays

NT-pro B-type natriuretic peptide will be analysed using a Sandwich immunoassay using monoclonal ruthenium labelled antibody and Roche Cobas 8000 e602. The total coefficient of variation for repeatability with this assay is <2% with an estimated volume of 250 microlitres required for each test and measurement range of 5-35000 pg/mL (0.6-4130 pmol/L).

### 9.7.2 Cellular Response to Rate Control

The effect of baseline and follow-up serum on intracellular sodium/calcium, force of contraction and activation of ERK1/2-dependent cascades will be examined in human induced pluripotent stem cell-derived cardiomyocytes, using well-established integrated fluorescence/contractility photometry and western blotting techniques.<sup>90, 91</sup> DigiFAB<sup>92</sup>, will be used to determine whether changes are dependent on endogenous cardiotoxic steroids, which can modulate intracellular ion concentration in cardiomyocytes<sup>93, 94</sup>, and potentially contribute to treatment discontinuation (or the development of toxicity).<sup>95</sup> The concentration of serum cardiotoxic steroids will be determined using liquid chromatography–tandem mass spectrometry. Individual change in cardiotoxic steroids and intracellular sodium/calcium will be correlated with the change in heart rate, LVEF, B-type natriuretic peptide and quality of life. In addition, we will identify patterns in patients withdrawing from treatment or experiencing adverse reactions.

### 9.7.3 Stored Blood Samples

Blood samples will be stored at HBRC for future biomarker and genetic analysis, with participants providing explicit consent for this process. Any future use of these samples will be undertaken with ethical approval.

### 9.7.4 Specimen Preparation, Handling, Storage and Shipment

Specimens will be handled according to local standard operating procedures consisting of the time requirements for processing, required temperatures, aliquots of specimens, where they will be stored, how they will be labelled, the process for remnant samples/disposal and appropriate instructions for transportation.

## 9.8 Economic Evaluation

The RATE-AF trial will allow determination of the most appropriate data collection methods and ease of acquiring resource use and cost data for a subsequent outcomes trial. Specifically, how data is obtained from secondary care records, patient-reported resource use and the feasibility of obtaining primary care records. A preliminary economic evaluation from an NHS perspective will be performed to estimate costs over the 12-month period. The patient-level cost-analysis will determine all AF-related costs, with respect to trial interventions and secondary-care resource use (including adverse events) in the two arms of the trial. We will collect both cost and outcome data and present them in a cost-consequence analysis. Costing for this trial suggests that simplifying medication alone could result in a saving of £5900 over each 12-month period.

1  
2  
3 Considering the high and increasing prevalence of AF, this could result in a substantial NHS cost  
4 savings, particularly if adverse reactions are also reduced. The aim of this objective within the  
5 trial is to prepare the groundwork for a future cost-per-quality adjusted life year (QALY) analysis  
6 of rate-control in AF.  
7  
8

9  
10 Costs of care will be derived from patient level resource-use data, focusing on secondary care  
11 costs, and including adverse effects, such as pacemaker implantation. Other major drivers of  
12 cost are hospitalisation (including visits to Accident & Emergency), unplanned outpatient visits  
13 and outpatient tests such as echocardiography or ambulatory ECG. The cost analysis will also  
14 consider therapy costs, both trial drug and additional treatments. Unit costs will be obtained from  
15 standard sources including NHS Reference Costs, Unit Costs of Health and Social Care<sup>96</sup> and  
16 health care providers. Total per-patient health care costs will initially be calculated thus allowing  
17 the estimation of mean costs per trial arm over 12 months follow-up. Responses to the EQ-5D-  
18 5L questionnaire at baseline, visit 2 (6 months) and visit 3 (12 months) will be used to plan a  
19 future QALY analysis.  
20  
21  
22  
23  
24

25 Key feasibility elements are:

- 26 • Determining the best methods for obtaining hospitalisation data, including where  
27 participants have been hospitalised outside of research site
- 28 • Whether robust primary care costs can be estimated and the method(s) for acquiring this  
29 type of data
- 30 • How key cost drivers can be incorporated into data collection for any future trial  
31  
32  
33  
34  
35  
36  
37  
38  
39  
40  
41  
42  
43  
44  
45  
46  
47  
48  
49  
50  
51  
52  
53  
54  
55  
56  
57  
58  
59  
60

## 10 Pharmacovigilance

Definitions of different types of AE are listed in **Table 2**. The Investigator should assess the seriousness and causality (relatedness) of AEs experienced by the participant (this should be documented in the source data). For further information please refer to **Section 10.1**.

**Table 2: Standard AE Definitions**

| Term                                                                                                      | Definition                                                                                                                                                                                                                                                                                                                                                                                                                                                         |
|-----------------------------------------------------------------------------------------------------------|--------------------------------------------------------------------------------------------------------------------------------------------------------------------------------------------------------------------------------------------------------------------------------------------------------------------------------------------------------------------------------------------------------------------------------------------------------------------|
| <b>Adverse Event (AE)</b>                                                                                 | Any untoward medical occurrence in a patient or clinical trial participant administered a medicinal product and which does not necessarily have a causal relationship with this treatment                                                                                                                                                                                                                                                                          |
| <b>Adverse Reaction (AR)</b>                                                                              | Any untoward and unintended response in a participant to an investigational medicinal product which is related to any dose administered to that participant                                                                                                                                                                                                                                                                                                        |
| <b>Serious adverse event (SAE), serious adverse reaction (SAR) or unexpected serious adverse reaction</b> | Any adverse event, adverse reaction or unexpected adverse reaction, respectively, that: <ul style="list-style-type: none"> <li>• results in death;</li> <li>• is life-threatening;</li> <li>• requires hospitalisation or prolongation of existing hospitalisation;</li> <li>• results in persistent or significant disability or incapacity; or</li> <li>• consists of a congenital anomaly or birth defect</li> </ul>                                            |
| <b>Unexpected Adverse Reaction</b>                                                                        | An adverse reaction the nature and severity of which is not consistent with the information about the medicinal product in question set out: <ol style="list-style-type: none"> <li>(a) in the case of a product with a marketing authorisation, in the summary of product characteristics for that product;</li> <li>(b) in the case of any other investigational medicinal product, in the investigator's brochure relating to the trial in question.</li> </ol> |
| <b>SUSAR</b>                                                                                              | Suspected Unexpected Serious Adverse Reaction                                                                                                                                                                                                                                                                                                                                                                                                                      |

### 10.1 Recording and Assessment of Adverse Events

All adverse events will be reportable to the **RATE-AF** Trial Office up to 30 days post last IMP administration. Any SUSAR related to the IMP should to be reported irrespective of how long after IMP administration the reaction has occurred.

Adverse events will be recorded in the medical records and CRFs. Most AE/ARs that occur in this trial, whether they are serious or not, will be 'expected' treatment-related toxicities due to the drugs used in this trial.

Refer to **Table 3** for definition of expectedness.

**Table 3: Expectedness**

| Category          | Definition                                                                                                                                                                                                         |
|-------------------|--------------------------------------------------------------------------------------------------------------------------------------------------------------------------------------------------------------------|
| <b>Expected</b>   | An adverse event that is classed in nature as serious and which is consistent with the information about the IMP listed in the Investigator Brochure (or SmPC if Licensed IMP) or clearly defined in this protocol |
| <b>Unexpected</b> | An adverse event that is classed in nature as serious and which is not consistent with the information about the IMP listed in the Investigator Brochure (or SmPC if Licensed IMP)                                 |

Adverse events will be recorded with clinical symptoms and accompanied with a simple, brief description of the event, including dates as appropriate.

The assessment of relationship of adverse events to the administration of IMP is a clinical decision based on all available information at the time. The following categories as outlined in **Table 4** will be used to define the causality of the adverse event.

**Table 4: Categorisation of Causality**

| Category           | Definition                                                                                                                                                                                                                                                                                           |
|--------------------|------------------------------------------------------------------------------------------------------------------------------------------------------------------------------------------------------------------------------------------------------------------------------------------------------|
| <b>Definitely</b>  | There is clear evidence to suggest a causal relationship, and other possible contributing factors can be ruled out                                                                                                                                                                                   |
| <b>Probably</b>    | There is evidence to suggest a causal relationship, and the influence of other factors is unlikely                                                                                                                                                                                                   |
| <b>Possibly</b>    | There is some evidence to suggest a causal relationship (e.g. the event occurred within a reasonable time after administration of the trial medication). However, the influence of other factors may have contributed to the event (e.g. the patient's clinical condition, other concomitant events) |
| <b>Unlikely</b>    | There is little evidence to suggest there is a causal relationship (e.g. the event did not occur within a reasonable time after administration of the trial medication). There is another reasonable explanation for the event (e.g. the patient's clinical condition, other concomitant treatments) |
| <b>Not related</b> | There is no evidence of any causal relationship                                                                                                                                                                                                                                                      |

The relevant SmPC for Digoxin and Bisoprolol (which will be dependent on which generic is being used according to local practice at each site) should be filed in the site file by the local research team.

1  
2  
3 The **RATE-AF** Trial protocol and the reference safety information will be used to assess disease  
4 related and/or expected events related to the trial treatment.  
5  
6

## 7 **10.2 Non-Serious Adverse Events/ Adverse Reactions**

8  
9 *Refer to Table 2 for definitions*  
10  
11

12  
13 Common adverse reactions (see Section 7.4) will be recorded on the relevant CRF and sent to  
14 the **RATE-AF** Trial Office.  
15  
16

## 17 **10.3 Serious Adverse Events**

18  
19 *Refer to Table 2 for definitions*  
20  
21

22  
23 All Serious Adverse Events (SAEs), that are not excluded from expedited reporting will be  
24 recorded in the hospital notes and should be reported to the **RATE-AF** Trial Office on a SAE  
25 Form. The completed form should be **faxed to the RATE-AF Trial Office on 0121 415 9135 or**  
26 **0121 415 9136**, as soon as possible and ideally within one working day of becoming aware of the  
27 event. The site Investigator should be able to respond to any related queries raised by the  
28 **RATE-AF** Trial Office as soon as possible.  
29  
30  
31

### 32 **10.3.1 Expected SAEs NOT to be Reported on a SAE Form**

33  
34 Expected SAEs are those listed in the current SmPC for the trial IMPs and can be excluded from  
35 the expedited reporting outlined in **Section 10.1**, for example if they are expected to occur on a  
36 regular basis and offer no further new information to the safety profile. These events should  
37 continue to be recorded in the source data and relevant CRFs.  
38  
39  
40

41  
42 In addition, events **NOT** considered to be SAEs are hospitalisations for:

- 43 • Routine treatment or monitoring of the studied indication, not associated with any  
44 deterioration in condition
  - 45 • Treatment, which was elective or pre-planned, for a pre-existing condition that is unrelated  
46 to the indication under trial, and has not worsened
- 47  
48  
49  
50

51 **Note:** Death from any cause should be reported on an SAE Form and returned to the **RATE-AF**  
52 Trial Office.  
53  
54

## 55 **10.4 SUSARs**

56  
57 *Refer to Table 2 for definitions*  
58  
59

60 SAEs classed by as both suspected to be related to the trial IMP and unexpected are categorised  
as SUSARs, and are always subject to expedited reporting. An SAE Form should be completed,



1  
2  
3 and faxed to the RATE-AF Trial Office within 24 hours of the research staff at site becoming  
4 aware of the event. The local investigator will provide the causality assessment.  
5  
6

7 The Chief Investigator (or nominated individual) will undertake urgent review of all such SAEs  
8 and may request further information immediately from the clinical team at site. The Chief  
9 Investigator will not overrule the causality or seriousness assessment given by the local  
10 investigator but may add additional comment on these. The Chief Investigator will provide the  
11 determination of expectedness according to the reference safety information.  
12  
13

14  
15 SUSARs will be notified to the MHRA and REC by the RATE-AF Trial Office. SUSARs that are  
16 fatal or life-threatening will be notified to the MHRA and REC within 7 days after the RATE-AF  
17 Trial Office has been notified. Other SUSARs will be reported to the REC and MHRA within 15  
18 days after the Trial Office has been notified.  
19  
20  
21

## 22 **10.5 Development Safety Update Reports**

23  
24  
25 The RATE-AF Trial Office will provide the MHRA with Development Safety Update Reports  
26 (DSURs). The reports will be submitted within 60 days of the Developmental International Birth  
27 Date (DIBD) of the trial each year until the trial is declared ended.  
28  
29  
30

## 31 **10.6 Annual Progress Reports**

32  
33 An annual progress report will be submitted to the REC within 30 days of the anniversary date on  
34 which the favourable opinion was given, and annually until the trial is declared ended.  
35  
36  
37

## 38 **10.7 Pregnancy**

39  
40 Due to the age of participants that will be randomised into the RATE-AF Trial ( $\geq 60$  years), it is  
41 highly improbable that female participants will be pregnant at the time of randomisation, or  
42 become pregnant during the trial. Any pregnancies will be followed up for outcome; any outcome  
43 meeting the definition of an SAE will be reported to the RATE-AF Trial Office on the relevant  
44 CRF.  
45  
46  
47  
48

## 49 **10.8 Reporting Urgent Safety Measures**

50  
51  
52 If any urgent safety measures are taken the Principal Investigator/BCTU/Sponsor shall  
53 immediately and in any event no later than 3 days from the date the measures are taken, give  
54 written notice to the MHRA and the REC of the measures taken and the circumstances giving rise  
55 to those measures.  
56  
57  
58  
59  
60

## 11 Quality Control and Quality Assurance

### 11.1 Site Set-Up and Initiation

All participating Principal Investigators will be asked to sign the necessary agreements and supply a current CV to the Trials Office. All members of the site research team will also be required to sign a site signature and delegation log. Prior to commencing recruitment all sites will undergo a process of initiation and will have completed GCP training. Key members of the site research team will be required to attend either a meeting or a teleconference covering aspects of the trial design, protocol procedures, Adverse Event reporting, collection and reporting of data and record keeping. Sites will be provided with an Investigator Site File containing essential documentation, instructions, and other documentation required for the conduct of the trial. The Trials Office must be informed immediately of any change in the site research team.

### 11.2 Central Monitoring

Monitoring of this trial will be to ensure compliance with Good Clinical Practice. A risk proportionate approach to the initiation, management and monitoring of the trial will be adopted (as per the MRC/DH/MHRA Joint Project: Risk-adapted Approaches to the Management of Clinical Trials of Investigational Medicinal Products) and outlined in the trial-specific risk assessment.

The Trials Office will be in regular contact with the site research team to check on progress and address any queries that they may have. The Trials Office will check incoming CRFs for compliance with the protocol, data consistency, missing data and timing. Sites will be asked for missing data or clarification of inconsistencies or discrepancies. Sites will be requested to send in copies of signed Informed Consent Forms and other documentation for in-house review for all participants providing explicit consent.

Additional on-site monitoring visits may be triggered, for example by poor CRF return, poor data quality, low SAE reporting rates, excessive number of participant withdrawals or deviations. This will be detailed in the monitoring plan. If a monitoring visit is required the Trials Office will contact the site to arrange a date for the proposed visit and will provide the site with written confirmation. Investigators will allow the **RATE-AF** trial staff access to source documents as requested.

### 11.3 Audit and Inspection

The Principal Investigator will permit trial-related monitoring, quality checks, audits, ethical reviews, and regulatory inspection(s) at their site, providing direct access to source data/documents. The Principal Investigator will comply with these visits and any required follow up. Sites are also requested to notify the Trials Office of any MHRA inspections.

## 11.4 Notification of Serious Breaches

In accordance with Regulation 29A of the Medicines for Human Use (Clinical Trials) Regulations 2004 and its amendments the Sponsor of the trial is responsible for notifying the licensing authority in writing of any serious breach of the conditions and principles of GCP in connection with that trial or the protocol relating to that trial, within 7 days of becoming aware of that breach.

For the purposes of this regulation, a “serious breach” is a breach which is likely to effect to a significant degree the safety or physical or mental integrity of the participants of the trial; or the scientific value of the trial. Sites are therefore requested to notify the Trials office of any suspected trial-related serious breach of GCP and/or the trial protocol. Where the Trials Office is investigating whether or not a serious breach has occurred sites are also requested to cooperate with the Trials Office in providing sufficient information to report the breach to the MHRA where required and in undertaking any corrective and/or preventive action. Sites may be suspended from further recruitment in the event of serious and persistent non-compliance with the protocol and/or GCP, and/or poor recruitment. Any major problems identified during monitoring may be reported to Trial Management Group and Trial Oversight Committee, the REC and the relevant regulatory bodies. This includes reporting serious breaches of GCP and/or the trial protocol to the REC and MHRA. A copy is sent to the University of Birmingham Clinical Research Compliance Team at the time of reporting to the REC and/or relevant regulatory bodies.

## 11.5 Data Handling and Analysis

Paper CRFs must be completed, signed/ dated and either entered directly online or returned to the **RATE-AF** Trial Office by the PI or an authorised member of the site research team (as delegated on the **RATE-AF** Trial Signature and Delegation Log) within the timeframe listed in **Table 5**. Copies of all completed CRFs should be filed in the site file. Entries on paper CRFs should be made in ballpoint pen, in black ink, and must be legible. Any errors should be crossed out with a single stroke, the correction inserted and the change initialled and dated. If it is not obvious why a change has been made, an explanation should be written next to the change.

CRFs can be entered online at <http://www.bctu.bham.ac.uk/RATEAF>. Authorised staff at sites will require an individual secure login username and password to access this online data entry system.

Data reported on each CRF should be consistent with the source data or the discrepancies should be explained. If information is not known, this must be clearly indicated on the CRF. All missing and ambiguous data will be queried. All sections are to be completed.

CRF versions may be updated by the **RATE-AF** Trial Office, as appropriate, throughout the duration of the trial. Whilst this will not constitute a protocol amendment, new versions of the CRFs must be implemented by participating sites immediately on receipt.

It will be the responsibility of the Principal Investigator to ensure the accuracy of all data entered in the CRFs. The **RATE-AF** Trial Signature & Delegation Log will identify all those personnel with responsibilities for data collection.

Access to data, including the final trial dataset, will be limited to members of the Research Team.

The investigator(s)/institution(s) will permit trial-related monitoring, audits, REC review, and regulatory inspection(s), providing direct access to source data/documents. Trial participants are informed of this during the informed consent discussion and will consent to provide access to their medical notes.

**Table 5: Data Collection Forms**

| Form Name                   | Schedule for submission                                              |
|-----------------------------|----------------------------------------------------------------------|
| Randomisation Form          | Collected at randomisation                                           |
| Baseline and Follow-Up CRFs | As soon as possible after each follow-up assessment time point       |
| Serious Adverse Event Form  | Faxed within 24hrs of research staff at site becoming aware of event |

### 11.6 End of Trial

The end of trial will be 30 days after the last data capture. This will allow sufficient time for the completion of protocol procedures, data collection and data input. The Trials Office will notify the MHRA and REC that the trial has ended within 90 days of the end of trial. Where the trial has terminated early, the Trials Office will inform the MHRA and REC within 15 days of the end of trial. The Trials Office will provide them with a summary of the clinical trial report within 12 months of the end of trial.

A copy of the end of trial notification as well as the summary report is also sent to the University of Birmingham Research Governance Team at the time of sending these are sent to the MHRA and REC.

### 11.7 Archiving

Archiving will be authorised by the BCTU on behalf of the Sponsor following submission of the end of trial report.

Principal Investigators are responsible for the secure archiving of essential trial documents (for their site) as per their NHS Trust policy. All essential documents will be archived for a minimum of 25 years after completion of trial.

Destruction of essential documents will require authorisation from the BCTU on behalf of the Sponsor.

## 12 Statistical Considerations

### 12.1 Outcome measures

#### 12.1.1 Primary Outcome

Patient-reported quality of life (QoL) - SF-36 physical component summary score at six months

#### 12.1.2 Secondary Outcomes

##### Patient-reported QoL:

- SF-36 global and domain-specific scores at 6 and 12 months
- EQ-5D-5L summary index and visual analogue scale at six and twelve months
- AFEQT overall score at six and twelve months

##### Cardiac function:

- Echocardiographic LVEF at 12 months
- Diastolic function (E/e' and composite of diastolic indices) at 12 months
- Functional assessment:
- Six-minute walking distance at 6 and 12 months
- Change in European Heart Rhythm Association (EHRA) class at 6 and 12 months

##### Biomarkers:

- Change in B-type natriuretic peptide (BNP) levels at 6 months
- Change in heart rate using 24-hour ambulatory ECG

#### 12.1.3 Feasibility Outcomes

- Recruitment target of 3 patients per week across all participating centres.
- Compliance and reasons for non-compliance
- Number of withdrawals and losses to follow-up (with reasons)
- Drug discontinuation rate and adverse reactions requiring drug discontinuation.
- Number of patients needing therapy-induced requirement for additional treatment
- Population-specific standard deviations (SD) and proportions

- *SD of SF36 physical functioning score at 6 and 12 months*
- *SD of SF36 overall score at 6 and 12 months*
- *SD of AFEQT overall score at 6 and 12 months*
- *SD of LVEF and E/e' score at 6 and 12 months*
- *Unplanned hospitalisation admissions rates*
- Cardiovascular Events (particularly mortality, thromboembolic events, myocardial infarction and cardiovascular interventions)

The final analyses will follow a pre-specified analysis plan, drafted in conjunction with the Birmingham Clinical Trials Unit and submitted to the steering committee at the penultimate meeting. We intend to perform a primary intention-to-treat analysis, in addition to a per-protocol analysis.

Any additional (exploratory) analyses will be explicitly labelled as such in any subsequent manuscript.

## 12.2 Power Calculations

Randomising 144 patients we can assume an 85% power to detect an effect size of half a standard deviation in a continuous outcome measure of QoL (two-sided alpha of 0.05). A sample size of 160 patients would account for an estimated 10% loss to follow-up (including withdrawal and death prior to 12-month assessment). There is some evidence from existing research to support the notion that the treatment effect could be this large. The mean SF-36 role-physical score from the rate-control arm of the RACE study was 47, with a 17% improvement with rate-control over time.<sup>62</sup> In another study, CCB resulted in 22% improvement in a proprietary symptom-checklist, compared to a non-significant 8% change in those assigned to beta-blockers (SD 10-points in both groups). These values are also consistent with a 17% improvement in SF-36 scores in a third trial, PIAF.<sup>63</sup> Thus whilst it is possible that this trial may provide a clear indication of effect, it is accepted that the trial will be underpowered to detect smaller differences, reinforcing the requirement for a larger definitive trial which would also be powered to assess impact on clinical event rates.

## 12.3 Statistical analysis

A separate Statistical Analysis Plan for the RATE-AF trial provides a detailed description of the planned statistical analyses. A brief outline of these analyses is given below.

The primary comparison groups will be composed of those who are randomised to digoxin group and those randomised to the beta-blockers group. All analyses will be based on the intention to treat principle, with all patients analysed in the arms to which they were allocated irrespective of compliance with the randomised allocated treatment, and all patients will be included in the analyses. We will, as a sensitivity analysis, conduct per-protocol analyses, where appropriate.

For all analyses, a p-value <0.05 will be considered statistically significant.

### 12.3.1 Primary outcome analysis

The primary outcome for this trial is the continuous SF36 physical functioning domain score at 6 months. This outcome will be analysed using an ANCOVA model adjusting for treatment arm, baseline score and all minimisation variables. Results will be presented as difference in means and 95% confidence intervals.

### 12.3.2 Feasibility and Secondary outcomes analysis

The feasibility and secondary outcomes for the trial comprise of a combination of both continuous and categorical (dichotomous) data items.

#### Categorical endpoints:

For outcomes which are categorical (dichotomous) in nature, the proportion of participants and percentages will be analysed between arms.

Logistic/Log-binomial regression models will be fitted (where appropriate) to adjust for treatment arm, baseline scores and all minimisation variables.

Results will be presented as odds ratios/relative risks and 95% confidence intervals.

#### Continuous endpoints:

Any outcomes that are continuous in nature will be analysed in the same way as the primary outcome.

### 12.3.3 Missing data and sensitivity analyses

Primary analysis will concentrate on available data only, with no attempt made to impute missing data. Where appropriate, sensitivity analyses will be carried out to examine the possible impact of missing data on the results (full details will be discussed within the Statistical Analysis Plan).

### 12.3.4 Interim analyses and Stopping rules

Analysis of the data with respect to efficacy and safety will be performed at 12 months and sent to Data Monitoring Committee (DMC); see **Section 16**. The DMC will outline and agree the stopping rules for the trial which will be documented in the DMC charter. It is likely that the Haybittle-Peto boundary will be used. This states that if an interim analysis shows a probability of less than 0.001 that the treatments are different, then the trial should be stopped early. This will be used alongside data on important secondary endpoints and all other relevant evidence. A DMC report and charter outlining the terms of reference (including information on stopping rules) will be agreed with the DMEC.

## 12.4 Final analysis

The final analysis for the RATE-AF trial will occur once the last randomised participant completes their 12-month follow-up.

## 13 Ethics and Regulatory Requirements

The trial will be performed in accordance with the recommendations guiding physicians in biomedical research involving human participants, adopted by the 18<sup>th</sup> World Medical Association General Assembly, Helsinki, Finland, June 1964, amended at the 48<sup>th</sup> World Medical Association General Assembly, Somerset West, Republic of South Africa, October 1996 (website: <http://www.wma.net/en/30publications/10policies/b3/index.html>).

The trial will be conducted in accordance with the Research Governance Framework for Health and Social Care, the applicable UK Statutory Instruments, (which include the Medicines for Human Use Clinical Trials 2004 and subsequent amendments and the Data Protection Act 1998 and Human Tissue Act 2008, EU Clinical Trials Directive and amendment Regulations as appropriate) and Guidelines for Good Clinical Practice (GCP). This trial will be carried out under a Clinical Trial Authorisation in accordance with the Medicines for Human Use Clinical Trials regulations. The protocol will be submitted to and approved by the REC prior to circulation.

Before any participants are enrolled into the trial, the Principal Investigator at each site is required to obtain local R&D approval. Sites will not be permitted to enrol participants until written confirmation of R&D approval is received by the Principal Investigator.

It is the responsibility of the Principal Investigator to ensure that all subsequent amendments gain the necessary local approval. This does not affect the individual clinicians' responsibility to take immediate action if thought necessary to protect the health and interest of individual participants.

Within 90 days after the end of the trial, the Chief Investigator/Sponsor will ensure that the REC and the MHRA are notified that the trial has finished. If the trial is terminated prematurely, those reports will be made within 15 days after the end of the trial. The Chief Investigator will provide the Sponsor with a summary report of the clinical trial, which will then be submitted to the MHRA and REC within one year after the end of the trial.

## 14 Oversight Committees

### 14.1 Trial Management Group

The Trial Management Group (TMG) will comprise the CI, other lead investigators (clinical and non-clinical) and members of the BCTU. The TMG will be responsible for the day-to-day running and management of **RATE-AF**. The TMG will convene at regular intervals.



## 14.2 Trial Oversight Committee

A joint oversight committee comprising a Trial Steering Committee (TSC) and Data Monitoring Committee (DMC) will be engaged for this trial.

The role of the TSC is to provide the overall supervision of the trial. The TSC will monitor trial progress and conduct and advice on scientific credibility. The TSC will consider and act, as appropriate, upon the recommendations of the Data Monitoring Committee. Further details of the remit and role of the TSC are available in the TSC Charter.

An independent DMC will be established to oversee the safety of participants in the trial. The DMC will meet prior to the trial opening to enrolment, and then meet at least annually, or as per a timetable agreed by the DMC prior to trial commencement. Data analyses will be supplied in confidence to the DMC, which will be asked to give advice on whether the accumulated data from the trial, together with the results from other relevant research, justifies the continuing recruitment of further participants. The DMC will operate in accordance with the trial specific charter.

## 14.3 Protocol amendments

Where important protocol modifications are required as a result of oversight (for example, changes to eligibility criteria, outcomes or analyses), this information will be communicated to relevant parties, such as investigators, the REC, trial registries and regulators.

## 15 Finance

The RATE-AF Trial is funded through a Career Development Fellowship awarded to the Chief Investigator by the National Institute for Health Research (NIHR).

## 16 Confidentiality and Data Protection

Personal data recorded on all documents will be regarded as strictly confidential and will be handled and stored in accordance with the Data Protection Act 1998.

Participants will be identified using their unique trial identification number, date of birth and hospital number on the CRFs. and correspondence between the Trials Office and the participating site. Participants will give their explicit consent for the movement of their consent form, giving permission for the Trials Office to be sent a copy. This will be used to perform in-house monitoring of the consent process.

The Investigator must maintain documents not for submission to the Trials Office (e.g. Participant Identification Logs) in strict confidence. In the case of specific issues and/or queries from the

regulatory authorities, it will be necessary to have access to the complete trial records, provided that participant confidentiality is protected.

The Trials Office will maintain the confidentiality of all participants' data and will not disclose information by which participants may be identified to any third party other than those directly involved in the treatment of the participant and organisations for which the participant has given explicit consent for data transfer (e.g. competent authority, sponsor). Representatives of the RATE-AF Trials Office and sponsor may be required to have access to participant's notes for quality assurance purposes but participants should be reassured that their confidentiality will be respected at all times.

## 17 Insurance and Indemnity

The University of Birmingham has in place Clinical Trials indemnity coverage for this trial which provides cover to the University for harm which comes about through the University's, or its staff's, negligence in relation to the design or management of the trial and may alternatively, and at the University's discretion provide cover for non-negligent harm to participants.

With respect to the conduct of the trial at the Clinical Site and other clinical care of the patient, responsibility for the care of the patients remains with the NHS organisation responsible for the Clinical Site and is therefore indemnified through the NHS Litigation Authority.

The University of Birmingham is independent of any pharmaceutical company, and as such it is not covered by the Association of the British Pharmaceutical Industry (ABPI) guidelines for participant compensation.

## 18 Dissemination and Publication

Regular newsletters will keep collaborators informed of trial progress and regular meetings will be held to report the progress of the trial and to address any problems encountered in the conduct of the trial. The CI will coordinate dissemination of data from this trial. All publications and presentations, including abstracts, relating to the main trial will be authorised by the RATE-AF TMG. The results of the analysis will be published in the name of the RATE-AF Collaborative Group in a peer reviewed journal (provided that this does not conflict with the journal's policy).

Named authors must satisfy the International Committee of Medical Journal Editors (ICMJE) criteria for authorship (contribute to drafting of the article or revision for important intellectual content), provide timely approval of the final version to be published and supply detailed statements on any potential conflict of interest or financial relationship (<http://www.icmje.org/>). Members of the group who do not fulfil ICMJE criteria for authorship will be listed in the article appendix. Trial participants will be sent a lay summary of the final results of the trial, which will contain a reference to the full paper.

1  
2  
3  
4  
5 **19 Statement of Compliance**  
6

7 The **RATE-AF** trial will be conducted in compliance with the approved protocol, EU GCP and the  
8 applicable regulatory requirements.  
9

10  
11  
12  
13  
14  
15  
16  
17  
18  
19  
20  
21  
22  
23  
24  
25  
26  
27  
28  
29  
30  
31  
32  
33  
34  
35  
36  
37  
38  
39  
40  
41  
42  
43  
44  
45  
46  
47  
48  
49  
50  
51  
52  
53  
54  
55  
56  
57  
58  
59  
60

For peer review only

## 20 References

1. Camm AJ, Kirchhof P, Lip GY, Schotten U, Savelieva I, Ernst S, Van Gelder IC, Al-Attar N, Hindricks G, Prendergast B, Heidbuchel H, Alfieri O, Angelini A, Atar D, Colonna P, De Caterina R, De Sutter J, Goette A, Gorenek B, Heldal M, Hohloser SH, Kolh P, Le Heuzey JY, Ponikowski P, Rutten FH. Guidelines for the management of atrial fibrillation: the Task Force for the Management of Atrial Fibrillation of the European Society of Cardiology (ESC). *Eur Heart J*. 2010;31:2369-2429
2. Anderson JL, Halperin JL, Albert NM, Bozkurt B, Brindis RG, Curtis LH, DeMets D, Guyton RA, Hochman JS, Kovacs RJ, Ohman EM, Pressler SJ, Sellke FW, Shen W-K. Management of patients with atrial fibrillation (Compilation of 2006 ACCF/AHA/ESC and 2011 ACCF/AHA/HRS recommendations). *Circulation*. 2013;127:1916-1926
3. Camm AJ, Lip GY, De Caterina R, Savelieva I, Atar D, Hohnloser SH, Hindricks G, Kirchhof P, E. S. C. Committee for Practice Guidelines. 2012 focused update of the ESC Guidelines for the management of atrial fibrillation: an update of the 2010 ESC Guidelines for the management of atrial fibrillation. Developed with the special contribution of the European Heart Rhythm Association. *Eur Heart J*. 2012;33:2719-2747
4. National Institute for Health and Care Excellence. Atrial fibrillation: the management of atrial fibrillation. *NICE clinical guideline 180*. 2014; Accessed 15/09/2014; <http://www.nice.org.uk/guidance/cg180/>
5. Kotecha D, Holmes J, Krum H, Altman DG, Manzano L, Cleland JG, Lip GY, Coats AJ, Andersson B, Kirchhof P, von Lueder TG, Wedel H, Rosano G, Shibata MC, Rigby A, Flather MD, Beta-Blockers in Heart Failure Collaborative Group. Efficacy of beta blockers in patients with heart failure plus atrial fibrillation: an individual-patient data meta-analysis. *Lancet*. 2014;384:2235-2243
6. Ziff OJ, Lane DA, Samra M, Griffith M, Kirchhof P, Lip GY, Steeds RP, Townend J, Kotecha D. Safety and efficacy of digoxin: systematic review and meta-analysis of observational and controlled trial data. *BMJ*. 2015;351:h4451
7. Kotecha D, Banerjee A, Lip GY. Increased stroke risk in atrial fibrillation patients with heart failure: does ejection fraction matter? *Stroke*. 2015;46:608-609
8. Kotecha D, Kirchhof P. Rate and rhythm control have comparable effects on mortality and stroke in atrial fibrillation but better data are needed. *Evid Based Med*. 2014;19:222-223
9. Kotecha D, Piccini JP. Atrial fibrillation in heart failure: what should we do? *Eur Heart J*. 2015;36:3250-3257
10. Senoo K, Lip GY, Lane DA, Buller HR, Kotecha D. Residual risk of stroke and death in anticoagulated patients according to the type of atrial fibrillation: AMADEUS Trial. *Stroke*. 2015;46:2523-2528
11. Kotecha D, Chudasama R, Lane DA, Kirchhof P, Lip GY. Atrial fibrillation and heart failure due to reduced versus preserved ejection fraction: A systematic review and meta-analysis of death and adverse outcomes. *Int J Cardiol*. 2016;203:660-666
12. Arain M, Campbell MJ, Cooper CL, Lancaster GA. What is a pilot or feasibility study? A review of current practice and editorial policy. *BMC Med Res Methodol*. 2010;10:67
13. Thabane L, Ma J, Chu R, Cheng J, Ismaila A, Rios LP, Robson R, Thabane M, Giangregorio L, Goldsmith CH. A tutorial on pilot studies: the what, why and how. *BMC Med Res Methodol*. 2010;10:1
14. Heeringa J, van der Kuip DAM, Hofman A, Kors JA, van Herpen G, Stricker BHC, Stijnen T, Lip GYH, Witteman JCM. Prevalence, incidence and lifetime risk of atrial fibrillation: the Rotterdam study. *Eur Heart J*. 2006;27:949-953

15. Colilla S, Crow A, Petkun W, Singer DE, Simon T, Liu X. Estimates of Current and Future Incidence and Prevalence of Atrial Fibrillation in the U.S. Adult Population. *Am J Cardiol.* 2013;112:1142-1147
16. Kim MH, Johnston SS, Chu BC, Dalal MR, Schulman KL. Estimation of total incremental health care costs in patients with atrial fibrillation in the United States. *Circ Cardiovasc Qual Outcomes.* 2011;4:313-320
17. Benjamin EJ, Wolf PA, D'Agostino RB, Silbershatz H, Kannel WB, Levy D. Impact of Atrial Fibrillation on the Risk of Death: The Framingham Heart Study. *Circulation.* 1998;98:946-952
18. Stewart S, Hart CL, Hole DJ, McMurray JJV. A population-based study of the long-term risks associated with atrial fibrillation: 20-year follow-up of the Renfrew/Paisley study. *Am J Med.* 2002;113:359-364
19. Marijon E, Le Heuzey JY, Connolly S, Yang S, Pogue J, Brueckmann M, Eikelboom J, Themeles E, Ezekowitz M, Wallentin L, Yusuf S. Causes of death and influencing factors in patients with atrial fibrillation: a competing-risk analysis from the randomized evaluation of long-term anticoagulant therapy study. *Circulation.* 2013;128:2192-2201
20. Chen LY, Sotoodehnia N, Buzkova P, Lopez FL, Yee LM, Heckbert SR, Prineas R, Soliman EZ, Adabag S, Konety S, Folsom AR, Siscovick D, Alonso A. Atrial fibrillation and the risk of sudden cardiac death: the atherosclerosis risk in communities study and cardiovascular health study. *JAMA Intern Med.* 2013;173:29-35
21. Dorian P, Jung W, Newman D, Paquette M, Wood K, Ayers GM, Camm J, Akhtar M, Luderitz B. The impairment of health-related quality of life in patients with intermittent atrial fibrillation: implications for the assessment of investigational therapy. *J Am Coll Cardiol.* 2000;36:1303-1309
22. Thrall G, Lane D, Carroll D, Lip GYH. Quality of Life in Patients with Atrial Fibrillation: A Systematic Review. *Am J Med.* 2006;119:448.e441-419
23. Sears SF, Serber ER, Alvarez LG, Schwartzman DS, Hoyt RH, Ujhelyi MR. Understanding Atrial Symptom Reports: Objective versus Subjective Predictors. *Pacing Clin Electrophysiol.* 2005;28:801-807
24. Dries D, Exner D, Gersh B, Domanski M, Waclawiw M, Stevenson L. Atrial fibrillation is associated with an increased risk for mortality and heart failure progression in patients with asymptomatic and symptomatic left ventricular systolic dysfunction: a retrospective analysis of the SOLVD trials. *J Am Coll Cardiol.* 1998;32:695-703
25. Wang TJ, Larson MG, Levy D, Vasan RS, Leip EP, Wolf PA, D'Agostino RB, Murabito JM, Kannel WB, Benjamin EJ. Temporal Relations of Atrial Fibrillation and Congestive Heart Failure and Their Joint Influence on Mortality: The Framingham Heart Study. *Circulation.* 2003;107:2920-2925
26. The Atrial Fibrillation Follow-up Investigation of Rhythm Management (AFFIRM) Investigators. A Comparison of Rate Control and Rhythm Control in Patients with Atrial Fibrillation. *N Engl J Med.* 2002;347:1825-1833
27. Van Gelder IC, Hagens VE, Bosker HA, Kingma JH, Kamp O, Kingma T, Said SA, Darmanata JI, Timmermans AJM, Tijssen JGP, Crijns HJGM. A Comparison of Rate Control and Rhythm Control in Patients with Recurrent Persistent Atrial Fibrillation. *N Engl J Med.* 2002;347:1834-1840
28. Olshansky B, Rosenfeld LE, Warner AL, Solomon AJ, O'Neill G, Sharma A, Platia E, Feld GK, Akiyama T, Brodsky MA, Greene HL. The Atrial Fibrillation Follow-up Investigation of Rhythm Management (AFFIRM) study: approaches to control rate in atrial fibrillation. *J Am Coll Cardiol.* 2004;43:1201-1208
29. Hohnloser SH, Kuck KH, Lilienthal J. Rhythm or rate control in atrial fibrillation--Pharmacological Intervention in Atrial Fibrillation (PIAF): a randomised trial. *Lancet.* 2000;356:1789-1794

- 1
- 2
- 3 30. Carlsson J, Miketic S, Windeler J, Cuneo A, Haun S, Micus S, Walter S, Tebbe U, Investigators S. Randomized trial of rate-control versus rhythm-control in persistent atrial fibrillation: the Strategies of Treatment of Atrial Fibrillation (STAF) study. *J Am Coll Cardiol.* 2003;41:1690-1696
- 4
- 5
- 6 31. de Denus S, Sanoski CA, Carlsson J, Opolski G, Spinler SA. Rate vs rhythm control in patients with atrial fibrillation: a meta-analysis. *Arch Intern Med.* 2005;165:258-262
- 7
- 8
- 9 32. Chatterjee S, Sardar P, Lichstein E, Mukherjee D, Aikat S. Pharmacologic rate versus rhythm-control strategies in atrial fibrillation: an updated comprehensive review and meta-analysis. *PACE.* 2013;36:122-133
- 10
- 11
- 12
- 13 33. Shelton RJ, Clark AL, Goode K, Rigby AS, Houghton T, Kaye GC, Cleland JG. A randomised, controlled study of rate versus rhythm control in patients with chronic atrial fibrillation and heart failure: (CAFE-II Study). *Heart.* 2009;95:924-930
- 14
- 15
- 16
- 17 34. Roy D, Talajic M, Nattel S, Wyse DG, Dorian P, Lee KL, Bourassa MG, Arnold JMO, Buxton AE, Camm AJ, Connolly SJ, Dubuc M, Ducharme A, Guerra PG, Hohnloser SH, Lambert J, Le Heuzey J-Y, O'Hara G, Pedersen OD, Rouleau J-L, Singh BN, Stevenson LW, Stevenson WG, Thibault B, Waldo AL. Rhythm Control versus Rate Control for Atrial Fibrillation and Heart Failure. *N Engl J Med.* 2008;358:2667-2677
- 18
- 19
- 20
- 21
- 22
- 23 35. Kong MH, Shaw LK, O'Connor C, Califf RM, Blazing MA, Al-Khatib SM. Is rhythm-control superior to rate-control in patients with atrial fibrillation and diastolic heart failure? *Ann Noninvasive Electrocardiol.* 2010;15:209-217
- 24
- 25
- 26
- 27 36. Wazni O, Wilkoff B, Saliba W. Catheter Ablation for Atrial Fibrillation. *N Engl J Med.* 2011;365:2296-2304
- 28
- 29
- 30 37. Jones DG, Haldar SK, Hussain W, Sharma R, Francis DP, Rahman-Haley SL, McDonagh TA, Underwood SR, Markides V, Wong T. A randomized trial to assess catheter ablation versus rate control in the management of persistent atrial fibrillation in heart failure. *J Am Coll Cardiol.* 2013;61:1894-1903
- 31
- 32
- 33
- 34
- 35 38. Kirchhof P, Breithardt G, Camm AJ, Crijns HJ, Kuck KH, Vardas P, Wegscheider K. Improving outcomes in patients with atrial fibrillation: rationale and design of the Early treatment of Atrial fibrillation for Stroke prevention Trial. *Am Heart J.* 2013;166:442-448
- 36
- 37
- 38
- 39 39. Steg PG, Alam S, Chiang C-E, Gamra H, Goethals M, Inoue H, Krapf L, Lewalter T, Merioua I, Murin J, Naditch-Brûlé L, Ponikowski P, Rosenqvist M, Silva-Cardoso J, Zharinov O, Brette S, Neill JO. Symptoms, functional status and quality of life in patients with controlled and uncontrolled atrial fibrillation: data from the RealiseAF cross-sectional international registry. *Heart.* 2012;98:195-201
- 40
- 41
- 42
- 43
- 44 40. Nabauer M, Gerth A, Limbourg T, Schneider S, Oeff M, Kirchhof P, Goette A, Lewalter T, Ravens U, Meinertz T, Breithardt G, Steinbeck G. The Registry of the German Competence NETwork on Atrial Fibrillation: patient characteristics and initial management. *Europace.* 2009;11:423-434
- 45
- 46
- 47
- 48 41. Segal JB, McNamara RL, Miller MR, Kim N, Goodman SN, Powe NR, Robinson K, Yu D, Bass EB. The evidence regarding the drugs used for ventricular rate control. *J Fam Practice.* 2000;49:47-59
- 49
- 50
- 51 42. Farshi R, Kistner D, Sarma JSM, Longmate JA, Singh BN. Ventricular rate control in chronic atrial fibrillation during daily activity and programmed exercise: a crossover open-label study of five drug regimens. *J Am Coll Cardiol.* 1999;33:304-310
- 52
- 53
- 54
- 55 43. Koh KK, Kwon KS, Park HB, Baik SH, Park SJ, Lee KH, Kim EJ, Kim SH, Cho SK, Kim SS. Efficacy and safety of digoxin alone and in combination with low-dose diltiazem or betaxolol to control ventricular rate in chronic atrial fibrillation. *Am J Cardiol.* 1995;75:88-90
- 56
- 57
- 58
- 59 44. Nikolaidou T, Channer KS. Chronic atrial fibrillation: a systematic review of medical heart rate control management. *Postgrad Med J.* 2009;85:303-312
- 60

- 1  
2  
3 45. Ulimoen SR, Enger S, Carlson J, Platonov PG, Pripp AH, Abdelnoor M, Arnesen H, Gjesdal K, Tveit A. Comparison of four single-drug regimens on ventricular rate and arrhythmia-related symptoms in patients with permanent atrial fibrillation. *Am J Cardiol.* 2013;111:225-230
- 4  
5  
6  
7 46. Ulimoen SR, Enger S, Pripp AH, Abdelnoor M, Arnesen H, Gjesdal K, Tveit A. Calcium channel blockers improve exercise capacity and reduce N-terminal Pro-B-type natriuretic peptide levels compared with beta-blockers in patients with permanent atrial fibrillation. *Eur Heart J.* 2014;35:517-524
- 8  
9  
10  
11 47. Khand AU, Rankin AC, Martin W, Taylor J, Gemmell I, Cleland JG. Carvedilol alone or in combination with digoxin for the management of atrial fibrillation in patients with heart failure? *J Am Coll Cardiol.* 2003;42:1944-1951
- 12  
13  
14  
15 48. Vamos M, Erath JW, Hohnloser SH. Digoxin-associated mortality: a systematic review and meta-analysis of the literature. *Eur Heart J.* 2015; In press: 10.1093/eurheartj/ehv143
- 16  
17  
18 49. Gheorghide M, Fonarow GC, van Veldhuisen DJ, Cleland JG, Butler J, Epstein AE, Patel K, Aban IB, Aronow WS, Anker SD, Ahmed A. Lack of evidence of increased mortality among patients with atrial fibrillation taking digoxin: findings from post hoc propensity-matched analysis of the AFFIRM trial. *Eur Heart J.* 2013;34:1489-1497
- 19  
20  
21  
22  
23 50. Friberg L, Hammar N, Rosenqvist M. Digoxin in atrial fibrillation: report from the Stockholm Cohort study of Atrial Fibrillation (SCAF). *Heart.* 2010;96:275-280
- 24  
25  
26 51. Flory JH, Ky B, Haynes K, S MB, Munson J, Rowan C, Strom BL, Hennessy S. Observational cohort study of the safety of digoxin use in women with heart failure. *BMJ Open.* 2012;2:e000888
- 27  
28  
29 52. Andrey JL, Romero S, Garcia-Egido A, Escobar MA, Corzo R, Garcia-Dominguez G, Lechuga V, Gomez F. Mortality and morbidity of heart failure treated with digoxin. A propensity-matched study. *Int J Clin Pract.* 2011;65:1250-1258
- 30  
31  
32  
33 53. Lewis RV, Irvine N, McDevitt DG. Relationships between heart rate, exercise tolerance and cardiac output in atrial fibrillation: the effects of treatment with digoxin, verapamil and diltiazem. *Eur Heart J.* 1988;9:777-781
- 34  
35  
36  
37 54. Tsuneda T, Yamashita T, Fukunami M, Kumagai K, Niwano S, Okumura K, Inoue H. Rate control and quality of life in patients with permanent atrial fibrillation: the Quality of Life and Atrial Fibrillation (QOLAF) Study. *Circ J.* 2006;70:965-970
- 38  
39  
40  
41 55. Van Gelder IC, Groenveld HF, Crijns HJGM, Tuininga YS, Tijssen JGP, Alings AM, Hillege HL, Bergsma-Kadijk JA, Cornel JH, Kamp O, Tukkie R, Bosker HA, Van Veldhuisen DJ, Van den Berg MP. Lenient versus Strict Rate Control in Patients with Atrial Fibrillation. *N Engl J Med.* 2010;362:1363-1373
- 42  
43  
44  
45  
46 56. Groenveld HF, Crijns HJGM, Van den Berg MP, Van Sonderen E, Alings AM, Tijssen JGP, Hillege HL, Tuininga YS, Van Veldhuisen DJ, Ranchor AV, Van Gelder IC. The Effect of Rate Control on Quality of Life in Patients With Permanent Atrial Fibrillation: Data From the RACE II (Rate Control Efficacy in Permanent Atrial Fibrillation II) Study. *J Am Coll Cardiol.* 2011;58:1795-1803
- 47  
48  
49  
50  
51 57. Mulder BA, Van Veldhuisen DJ, Crijns HJGM, Tijssen JGP, Hillege HL, Alings M, Rienstra M, Groenveld HF, Van den Berg MP, Van Gelder IC. Lenient vs. strict rate control in patients with atrial fibrillation and heart failure: a post-hoc analysis of the RACE II study. *Eur J Heart Fail.* 2013;15:1311-1318
- 52  
53  
54  
55  
56 58. Groenveld HF, Tijssen JG, Crijns HJ, Van den Berg MP, Hillege HL, Alings M, Van Veldhuisen DJ, Van Gelder IC. Rate control efficacy in permanent atrial fibrillation: successful and failed strict rate control against a background of lenient rate control: data from RACE II (Rate Control Efficacy in Permanent Atrial Fibrillation). *J Am Coll Cardiol.* 2013;61:741-748
- 57  
58  
59  
60 59. US Department of Health and Human Services Food and Drug Administration. Guidance for industry: patient-reported outcome measures: use in medical product development to support

- 1  
2 labeling claims.  
3 [www.fda.gov/downloads/Drugs/GuidanceComplianceRegulatoryInformation/Guidances/UCM19328](http://www.fda.gov/downloads/Drugs/GuidanceComplianceRegulatoryInformation/Guidances/UCM193282.pdf)  
4 [2.pdf](http://www.fda.gov/downloads/Drugs/GuidanceComplianceRegulatoryInformation/Guidances/UCM193282.pdf). 2009  
5  
6  
7 60. Rienstra M, Lubitz SA, Mahida S, Magnani JW, Fontes JD, Sinner MF, Van Gelder IC, Ellinor PT,  
8 Benjamin EJ. Symptoms and Functional Status of Patients With Atrial Fibrillation: State of the Art  
9 and Future Research Opportunities. *Circulation*. 2012;125:2933-2943  
10  
11 61. Pepine CJ. Effects of pharmacologic therapy on health-related quality of life in elderly patients with  
12 atrial fibrillation: a systematic review of randomized and nonrandomized trials. *Clin Med Insights*  
13 *Cardiol*. 2013;7:1-20  
14  
15 62. Hagens VE, Ranchor AV, Van Sonderen E, Bosker HA, Kamp O, Tijssen JGP, Kingma JH, Crijns  
16 HJGM, Van Gelder IC. Effect of rate or rhythm control on quality of life in persistent atrial fibrillation:  
17 Results from the Rate Control Versus Electrical Cardioversion (RACE) study. *J Am Coll Cardiol*.  
18 2004;43:241-247  
19  
20 63. Grönefeld GC, Lilienthal J, Kuck K-H, Hohnloser SH. Impact of rate versus rhythm control on  
21 quality of life in patients with persistent atrial fibrillation: Results from a prospective randomized  
22 study. *Eur Heart J*. 2003;24:1430-1436  
23  
24 64. Ware Jr JE, Gandek B. Overview of the SF-36 Health Survey and the International Quality of Life  
25 Assessment (IQOLA) Project. *J Clin Epidemiol*. 1998;51:903-912  
26  
27 65. Herdman M, Gudex C, Lloyd A, Janssen M, Kind P, Parkin D, Bonser G, Badia X. Development  
28 and preliminary testing of the new five-level version of EQ-5D (EQ-5D-5L). *Qual Life Res*.  
29 2011;20:1727-1736  
30  
31 66. Devlin NJ, Krabbe PF. The development of new research methods for the valuation of EQ-5D-5L.  
32 *Eur J Health Econ*. 2013;14 Suppl 1:S1-3  
33  
34 67. Spertus J, Dorian P, Bubien R, Lewis S, Godejohn D, Reynolds MR, Lakkireddy DR, Wimmer AP,  
35 Bhandari A, Burk C. Development and validation of the Atrial Fibrillation Effect on QualiTy-of-Life  
36 (AFEQT) Questionnaire in patients with atrial fibrillation. *Circ Arrhythm Electrophysiol*. 2011;4:15-  
37 25  
38  
39 68. Dorian P, Burk C, Mullin CM, Bubien R, Godejohn D, Reynolds MR, Lakkireddy DR, Wimmer AP,  
40 Bhandari A, Spertus J. Interpreting changes in quality of life in atrial fibrillation: How much change  
41 is meaningful? *Am Heart J*. 2013;166:381-387.e388  
42  
43 69. Joint Formulary Committee. *British National Formulary*. London: BMJ Group and Pharmaceutical  
44 Press; 2013.  
45  
46 70. American Hospital Formulary Service. *Drug Information*. Bethesda: American Society of Health-  
47 System Pharmacists; 2013.  
48  
49 71. The Digitalis Investigation Group. The effect of digoxin on mortality and morbidity in patients with  
50 heart failure. *N Engl J Med*. 1997;336:525-533  
51  
52 72. Magnani B, Malini PL. Cardiac glycosides. Drug interactions of clinical significance. *Drug Safety*.  
53 1995;12:97-109  
54  
55 73. Ko DT, Hebert PR, Coffey CS, Sedrakyan A, Curtis JP, Krumholz HM. Beta-blocker therapy and  
56 symptoms of depression, fatigue, and sexual dysfunction. *JAMA*. 2002;288:351-357  
57  
58 74. Terwee C, Mokkink L, Knol D, Ostelo RJG, Bouter L, Vet HW. Rating the methodological quality in  
59 systematic reviews of studies on measurement properties: a scoring system for the COSMIN  
60 checklist. *Qual Life Res*. 2012;21:651-657  
  
75. Streiner DL, Norman GR. *Health measurement scales : a practical guide to their development and  
use*. Oxford ; New York: Oxford University Press; 2008.



- 1  
2  
3 76. Staniszewska S, Haywood KL, Brett J, Tutton L. Patient and public involvement in patient-reported  
4 outcome measures: evolution not revolution. *Patient*. 2012;5:79-87
- 5  
6 77. Calvert M, Kyte D, Duffy H, Gheorghe A, Mercieca-Bebber R, Ives J, Draper H, Brundage M,  
7 Blazeby J, King M. Patient-reported outcome (PRO) assessment in clinical trials: a systematic  
8 review of guidance for trial protocol writers. *PLoS One*. 2014;9:e110216
- 9  
10 78. McCabe PJ, Schumacher K, Barnason SA. Living with atrial fibrillation: a qualitative study. *J*  
11 *Cardiovasc Nurs*. 2011;26:336-344
- 12  
13 79. Kirchhof P, Auricchio A, Bax J, Crijns H, Camm J, Diener H-C, Goette A, Hindricks G, Hohnloser S,  
14 Kappenberger L, Kuck K-H, Lip GYH, Olsson B, Meinertz T, Priori S, Ravens U, Steinbeck G,  
15 Svernhage E, Tijssen J, Vincent A, Breithardt G. Outcome parameters for trials in atrial fibrillation:  
16 Recommendations from a consensus conference organized by the German Atrial Fibrillation  
17 Competence NETwork (AFNET) and the European Heart Rhythm Association (EHRA). *Eur Heart*  
18 *J*. 2007;28:2803-2817
- 19  
20 80. Haywood K, Brett J, Salek S, Marlett N, Penman C, Shklarov S, Norris C, Santana MJ,  
21 Staniszewska S. Patient and public engagement in health-related quality of life and patient-  
22 reported outcomes research: what is important and why should we care? Findings from the first  
23 ISOQOL patient engagement symposium. *Qual Life Res*. 2014: Epub ahead of print; PMID  
24 25194573
- 25  
26 81. Chan AW, Tetzlaff JM, Gotzsche PC, Altman DG, Mann H, Berlin JA, Dickersin K, Hrobjartsson A,  
27 Schulz KF, Parulekar WR, Krleza-Jeric K, Laupacis A, Moher D. SPIRIT 2013 explanation and  
28 elaboration: guidance for protocols of clinical trials. *BMJ*. 2013;346:e7586
- 29  
30 82. Calvert M, Kyte D, von Hildebrand M, King M, Moher D. Putting patients at the heart of health-care  
31 research. *Lancet*. 2015;385:1073-1074
- 32  
33 83. Kyte D, Duffy H, Fletcher B, Gheorghe A, Mercieca-Bebber R, King M, Draper H, Ives J, Brundage  
34 M, Blazeby J, Calvert M. Systematic evaluation of the patient-reported outcome (PRO) content of  
35 clinical trial protocols. *PLoS One*. 2014;9:e110229
- 36  
37 84. Kyte D, Draper H, Calvert M. Patient-reported outcome alerts: ethical and logistical considerations  
38 in clinical trials. *JAMA*. 2013;310:1229-1230
- 39  
40 85. Zbrozek A, Hebert J, Gogates G, Thorell R, Dell C, Molsen E, Craig G, Grice K, Kern S, Hines S.  
41 Validation of electronic systems to collect patient-reported outcome (PRO) data-recommendations  
42 for clinical trial teams: report of the ISPOR ePRO systems validation good research practices task  
43 force. *Value Health*. 2013;16:480-489
- 44  
45 86. Su H-M, Lin T-H, Hsu P-C, Lee W-H, Chu C-Y, Lee C-S, Voon W-C, Lai W-T, Sheu S-H. Global left  
46 ventricular longitudinal systolic strain as a major predictor of cardiovascular events in patients with  
47 atrial fibrillation. *Heart*. 2013;99:1588-1596
- 48  
49 87. Al-Omari MA, Finstuen J, Appleton CP, Barnes ME, Tsang TSM. Echocardiographic assessment of  
50 left ventricular diastolic function and filling pressure in atrial fibrillation. *Am J Cardiol*.  
51 2008;101:1759-1765
- 52  
53 88. Hijazi Z, Oldgren J, Siegbahn A, Granger CB, Wallentin L. Biomarkers in atrial fibrillation: a clinical  
54 review. *Eur Heart J*. 2013;34:1475-1480
- 55  
56 89. Parvez B, Chopra N, Rowan S, Vaglio JC, Muhammad R, Roden DM, Darbar D. A common beta1-  
57 adrenergic receptor polymorphism predicts favorable response to rate-control therapy in atrial  
58 fibrillation. *J Am Coll Cardiol*. 2012;59:49-56
- 59  
60 90. Mahmmoud YA, Shattock M, Cornelius F, Pavlovic D. Inhibition of K<sup>+</sup> transport through Na<sup>+</sup>, K<sup>+</sup>-  
ATPase by capsazepine: role of membrane span 10 of the alpha-subunit in the modulation of ion  
gating. *PLoS One*. 2014;9:e96909

- 1  
2  
3 91. Pavlovic D, Hall AR, Kennington EJ, Aughton K, Boguslavskyi A, Fuller W, Despa S, Bers DM, Shattock MJ. Nitric oxide regulates cardiac intracellular Na(+) and Ca(2)(+) by modulating Na/K ATPase via PKCepsilon and phospholemman-dependent mechanism. *J Mol Cell Cardiol.* 2013;61:164-171  
4  
5  
6  
7  
8 92. Pullen MA, Brooks DP, Edwards RM. Characterization of the neutralizing activity of digoxin-specific Fab toward ouabain-like steroids. *J Pharmacol Exp Ther.* 2004;310:319-325  
9  
10 93. Manunta P, Messaggio E, Casamassima N, Gatti G, Carpini SD, Zagato L, Hamlyn JM. Endogenous ouabain in renal Na(+) handling and related diseases. *Biochim Biophys Acta.* 2010;1802:1214-1218  
11  
12  
13  
14 94. Pavlovic D. The role of cardiotonic steroids in the pathogenesis of cardiomyopathy in chronic kidney disease. *Nephron Clin Pract.* 2014;128:11-21  
15  
16  
17 95. Song H, Karashima E, Hamlyn JM, Blaustein MP. Ouabain-digoxin antagonism in rat arteries and neurones. *J Physiol.* 2014;592:941-969  
18  
19  
20 96. Curtis L. Unit Costs of Health & Social Care 2012. *Personal Social Services Research Unit.* 2012:<http://www.pssru.ac.uk/archive/pdf/uc/uc2012/full-with-covers.pdf>  
21  
22  
23 97. Jerosch-Herold M. Quantification of myocardial perfusion by cardiovascular magnetic resonance. *Journal of Cardiovascular Magnetic Resonance.* 2010;12:57  
24  
25  
26  
27  
28  
29  
30  
31  
32  
33  
34  
35  
36  
37  
38  
39  
40  
41  
42  
43  
44  
45  
46  
47  
48  
49  
50  
51  
52  
53  
54  
55  
56  
57  
58  
59  
60

APPENDIX A – Dosing Schedule (Digoxin)

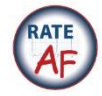

Randomised treatment arm: Group A

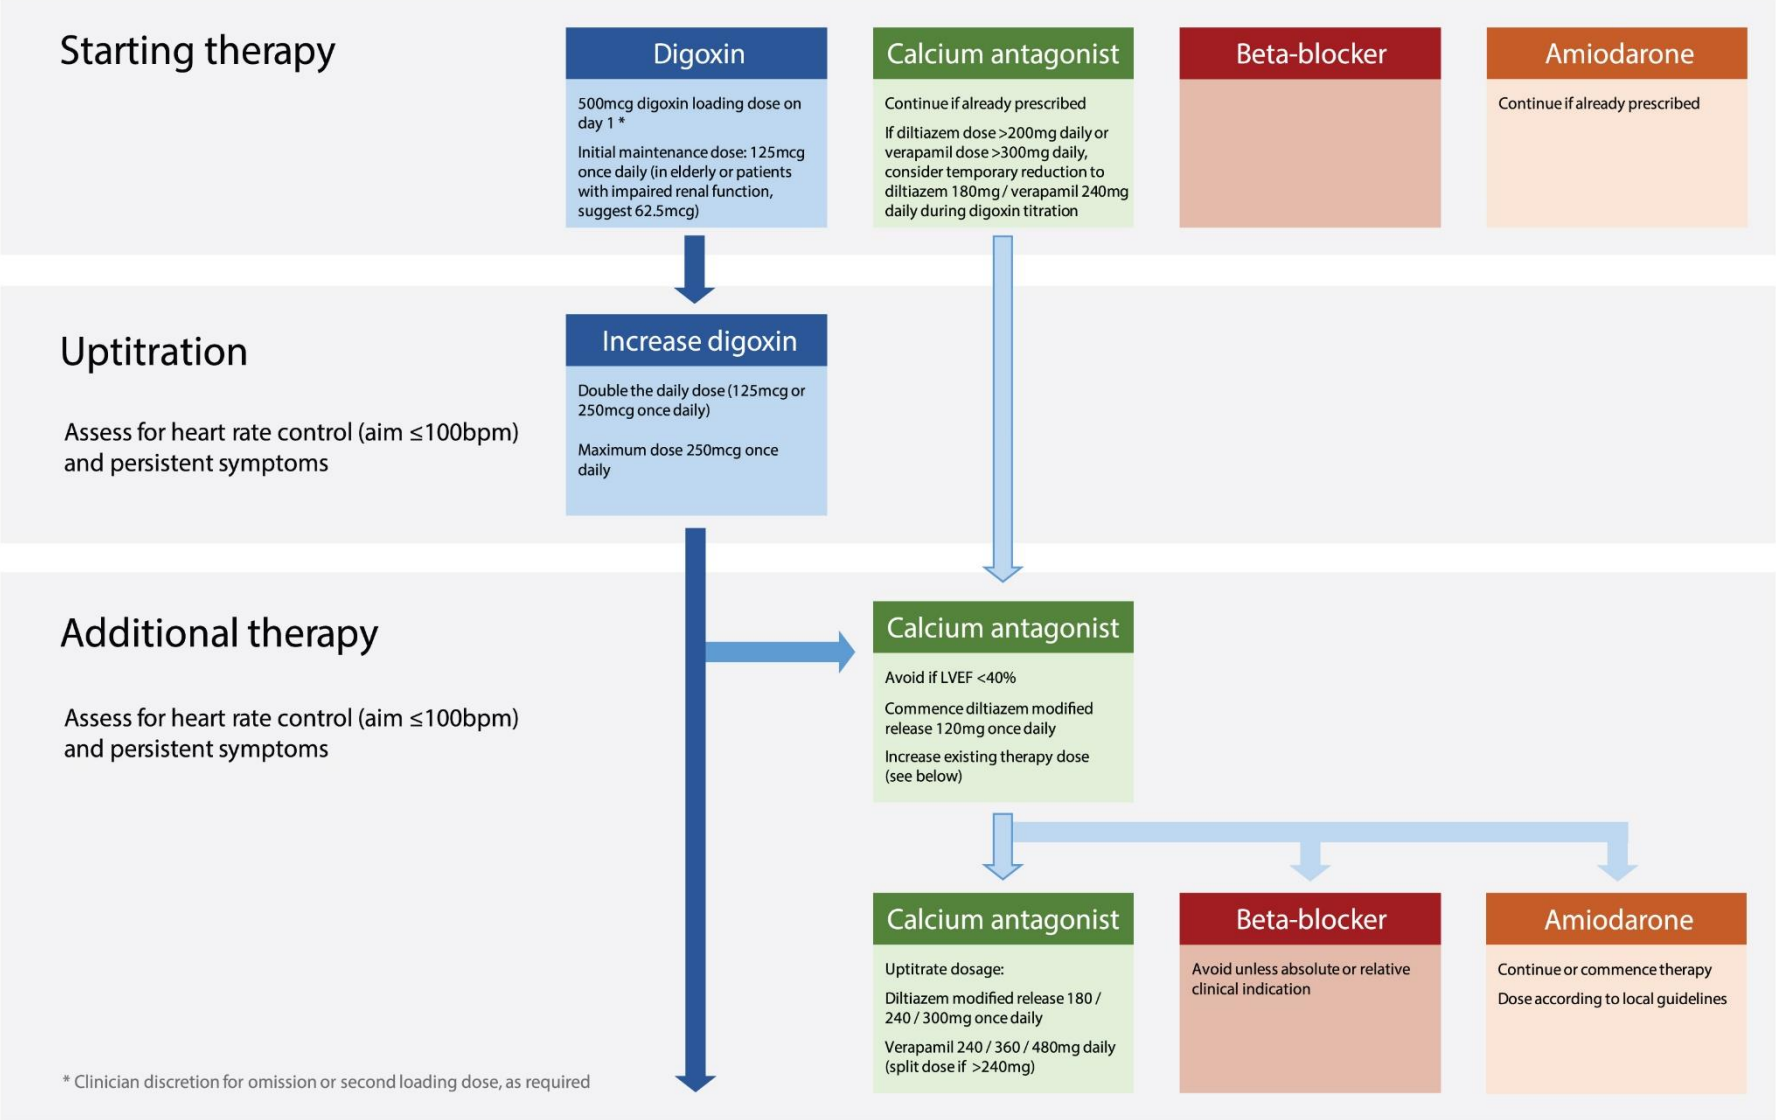

1  
2  
3  
4  
5  
6  
7  
8  
9  
10  
11  
12  
13  
14  
15  
16  
17  
18  
19  
20  
21  
22  
23  
24  
25  
26  
27  
28  
29  
30  
31  
32  
33  
34  
35  
36  
37  
38  
39  
40  
41  
42  
43  
44  
45  
46  
47

APPENDIX B – Dosing Schedule (Bisoprolol)

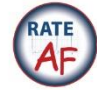

Randomised treatment arm: Group B

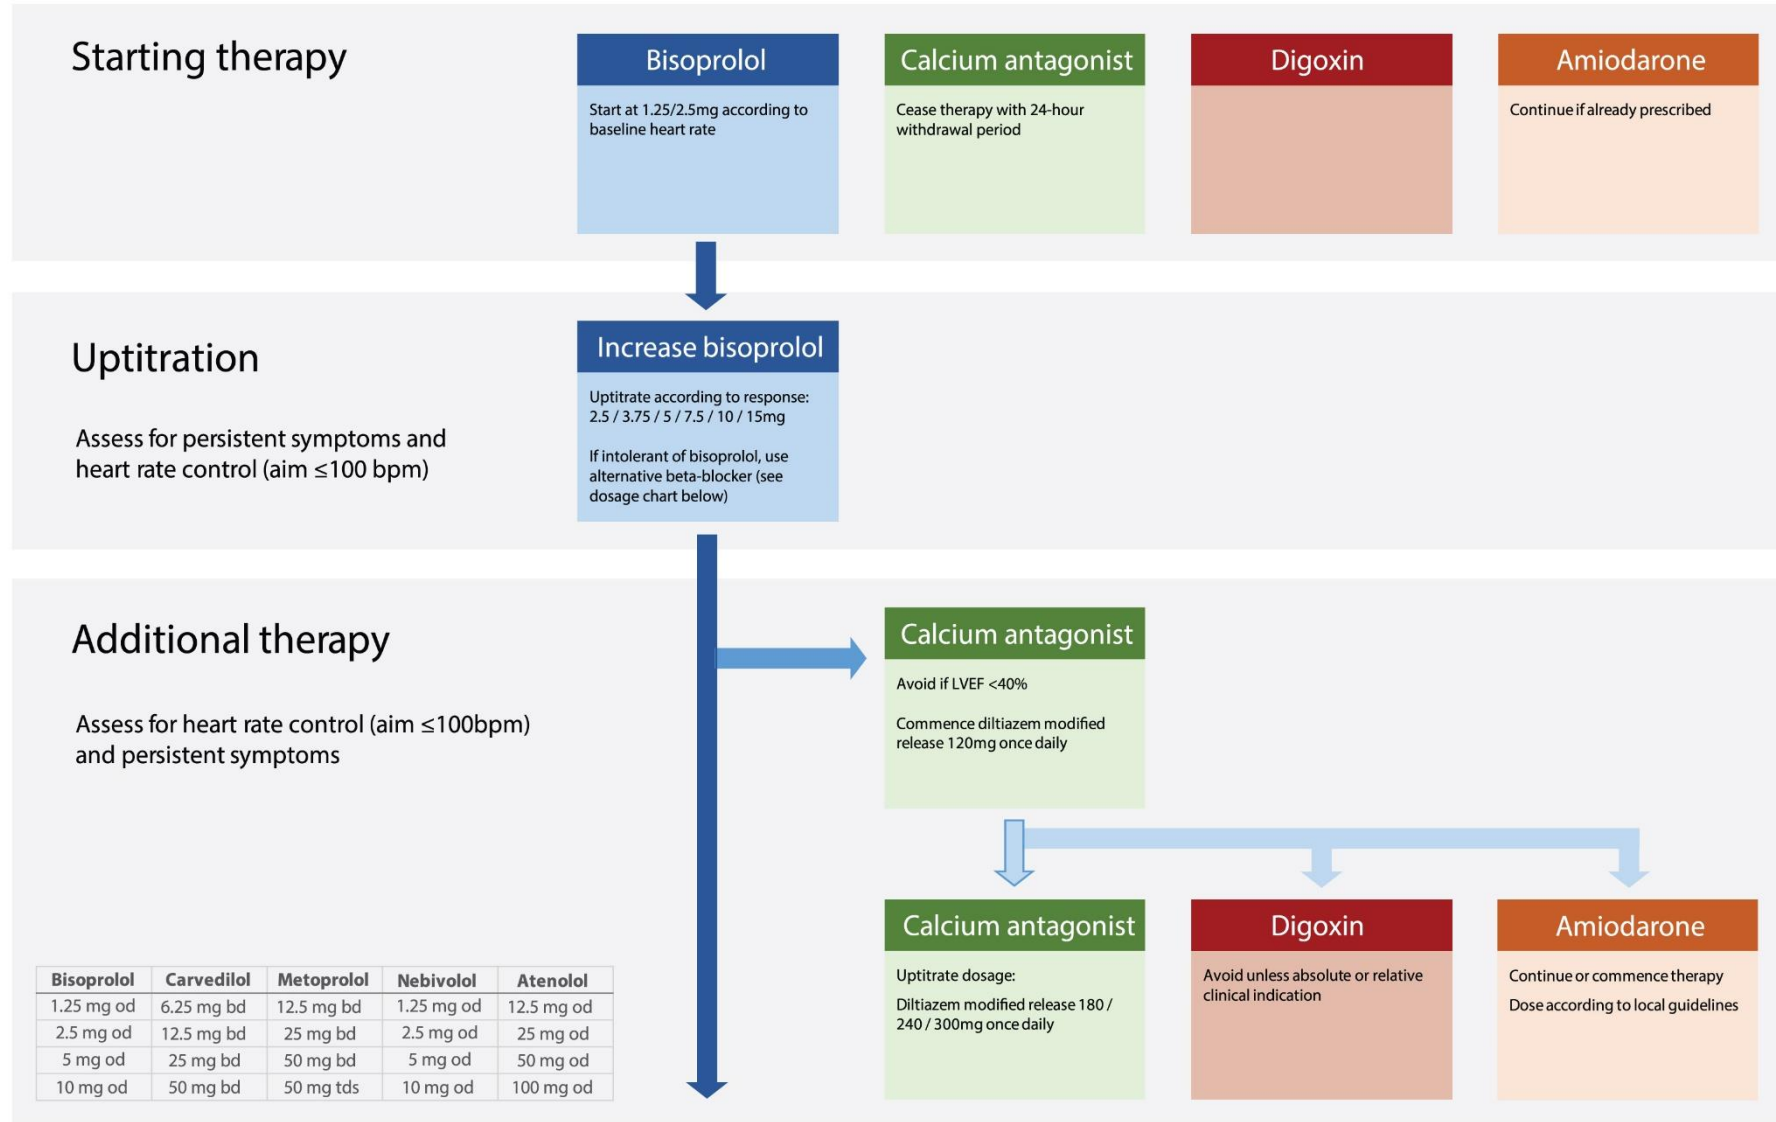

1  
2  
3  
4  
5  
6  
7  
8  
9  
10  
11  
12  
13  
14  
15  
16  
17  
18  
19  
20  
21  
22  
23  
24  
25  
26  
27  
28  
29  
30  
31  
32  
33  
34  
35  
36  
37  
38  
39  
40  
41  
42  
43  
44  
45  
46  
47

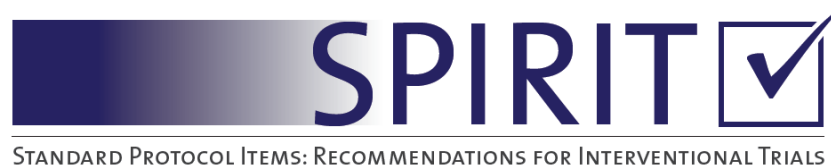

STANDARD PROTOCOL ITEMS: RECOMMENDATIONS FOR INTERVENTIONAL TRIALS

SPIRIT 2013 Checklist: Recommended items to address in a clinical trial protocol and related documents\*

| Section/item                      | Item No | Description                                                                                                                                                                                                                                                                              | Addressed on page number |
|-----------------------------------|---------|------------------------------------------------------------------------------------------------------------------------------------------------------------------------------------------------------------------------------------------------------------------------------------------|--------------------------|
| <b>Administrative information</b> |         |                                                                                                                                                                                                                                                                                          |                          |
| Title                             | 1       | Descriptive title identifying the study design, population, interventions, and, if applicable, trial acronym                                                                                                                                                                             | _____                    |
| Trial registration                | 2a      | Trial identifier and registry name. If not yet registered, name of intended registry                                                                                                                                                                                                     | _____                    |
|                                   | 2b      | All items from the World Health Organization Trial Registration Data Set                                                                                                                                                                                                                 | _____                    |
| Protocol version                  | 3       | Date and version identifier                                                                                                                                                                                                                                                              | _____                    |
| Funding                           | 4       | Sources and types of financial, material, and other support                                                                                                                                                                                                                              | _____                    |
| Roles and responsibilities        | 5a      | Names, affiliations, and roles of protocol contributors                                                                                                                                                                                                                                  | _____                    |
|                                   | 5b      | Name and contact information for the trial sponsor                                                                                                                                                                                                                                       | _____                    |
|                                   | 5c      | Role of study sponsor and funders, if any, in study design; collection, management, analysis, and interpretation of data; writing of the report; and the decision to submit the report for publication, including whether they will have ultimate authority over any of these activities | _____                    |
|                                   | 5d      | Composition, roles, and responsibilities of the coordinating centre, steering committee, endpoint adjudication committee, data management team, and other individuals or groups overseeing the trial, if applicable (see Item 21a for data monitoring committee)                         | _____                    |

1 **Introduction**

2

3 Background and 6a Description of research question and justification for undertaking the trial, including summary of relevant  
4 rationale studies (published and unpublished) examining benefits and harms for each intervention \_\_\_\_\_  
5

6 6b Explanation for choice of comparators \_\_\_\_\_  
7

8 Objectives 7 Specific objectives or hypotheses \_\_\_\_\_  
9

10 Trial design 8 Description of trial design including type of trial (eg, parallel group, crossover, factorial, single group),  
11 allocation ratio, and framework (eg, superiority, equivalence, noninferiority, exploratory) \_\_\_\_\_  
12  
13

14 **Methods: Participants, interventions, and outcomes**

15

16 Study setting 9 Description of study settings (eg, community clinic, academic hospital) and list of countries where data will  
17 be collected. Reference to where list of study sites can be obtained \_\_\_\_\_  
18

19 Eligibility criteria 10 Inclusion and exclusion criteria for participants. If applicable, eligibility criteria for study centres and  
20 individuals who will perform the interventions (eg, surgeons, psychotherapists) \_\_\_\_\_  
21

22 Interventions 11a Interventions for each group with sufficient detail to allow replication, including how and when they will be  
23 administered \_\_\_\_\_  
24

25 11b Criteria for discontinuing or modifying allocated interventions for a given trial participant (eg, drug dose  
26 change in response to harms, participant request, or improving/worsening disease) \_\_\_\_\_  
27

28 11c Strategies to improve adherence to intervention protocols, and any procedures for monitoring adherence  
29 (eg, drug tablet return, laboratory tests) \_\_\_\_\_  
30

31 11d Relevant concomitant care and interventions that are permitted or prohibited during the trial \_\_\_\_\_  
32

33 Outcomes 12 Primary, secondary, and other outcomes, including the specific measurement variable (eg, systolic blood  
34 pressure), analysis metric (eg, change from baseline, final value, time to event), method of aggregation (eg,  
35 median, proportion), and time point for each outcome. Explanation of the clinical relevance of chosen  
36 efficacy and harm outcomes is strongly recommended \_\_\_\_\_  
37

38 Participant timeline 13 Time schedule of enrolment, interventions (including any run-ins and washouts), assessments, and visits for  
39 participants. A schematic diagram is highly recommended (see Figure) \_\_\_\_\_  
40  
41  
42  
43

1 Sample size 14 Estimated number of participants needed to achieve study objectives and how it was determined, including \_\_\_\_\_  
 2 clinical and statistical assumptions supporting any sample size calculations

4 Recruitment 15 Strategies for achieving adequate participant enrolment to reach target sample size \_\_\_\_\_

7 **Methods: Assignment of interventions (for controlled trials)**

9 Allocation:

11 Sequence 16a Method of generating the allocation sequence (eg, computer-generated random numbers), and list of any \_\_\_\_\_  
 12 generation factors for stratification. To reduce predictability of a random sequence, details of any planned restriction  
 13 (eg, blocking) should be provided in a separate document that is unavailable to those who enrol participants  
 14 or assign interventions

17 Allocation 16b Mechanism of implementing the allocation sequence (eg, central telephone; sequentially numbered, \_\_\_\_\_  
 18 concealment opaque, sealed envelopes), describing any steps to conceal the sequence until interventions are assigned  
 19 mechanism

21 Implementation 16c Who will generate the allocation sequence, who will enrol participants, and who will assign participants to \_\_\_\_\_  
 22 interventions

25 Blinding (masking) 17a Who will be blinded after assignment to interventions (eg, trial participants, care providers, outcome \_\_\_\_\_  
 26 assessors, data analysts), and how

28 17b If blinded, circumstances under which unblinding is permissible, and procedure for revealing a participant's \_\_\_\_\_  
 29 allocated intervention during the trial

32 **Methods: Data collection, management, and analysis**

34 Data collection 18a Plans for assessment and collection of outcome, baseline, and other trial data, including any related \_\_\_\_\_  
 35 methods processes to promote data quality (eg, duplicate measurements, training of assessors) and a description of  
 36 study instruments (eg, questionnaires, laboratory tests) along with their reliability and validity, if known.  
 37 Reference to where data collection forms can be found, if not in the protocol

40 18b Plans to promote participant retention and complete follow-up, including list of any outcome data to be \_\_\_\_\_  
 41 collected for participants who discontinue or deviate from intervention protocols

|    |                                 |     |                                                                                                              |       |
|----|---------------------------------|-----|--------------------------------------------------------------------------------------------------------------|-------|
| 1  | Data management                 | 19  | Plans for data entry, coding, security, and storage, including any related processes to promote data quality | _____ |
| 2  |                                 |     | (eg, double data entry; range checks for data values). Reference to where details of data management         |       |
| 3  |                                 |     | procedures can be found, if not in the protocol                                                              |       |
| 4  |                                 |     |                                                                                                              |       |
| 5  | Statistical methods             | 20a | Statistical methods for analysing primary and secondary outcomes. Reference to where other details of the    | _____ |
| 6  |                                 |     | statistical analysis plan can be found, if not in the protocol                                               |       |
| 7  |                                 |     |                                                                                                              |       |
| 8  |                                 | 20b | Methods for any additional analyses (eg, subgroup and adjusted analyses)                                     | _____ |
| 9  |                                 |     |                                                                                                              |       |
| 10 |                                 | 20c | Definition of analysis population relating to protocol non-adherence (eg, as randomised analysis), and any   | _____ |
| 11 |                                 |     | statistical methods to handle missing data (eg, multiple imputation)                                         |       |
| 12 |                                 |     |                                                                                                              |       |
| 13 |                                 |     |                                                                                                              |       |
| 14 |                                 |     |                                                                                                              |       |
| 15 | <b>Methods: Monitoring</b>      |     |                                                                                                              |       |
| 16 |                                 |     |                                                                                                              |       |
| 17 | Data monitoring                 | 21a | Composition of data monitoring committee (DMC); summary of its role and reporting structure; statement of    | _____ |
| 18 |                                 |     | whether it is independent from the sponsor and competing interests; and reference to where further details   |       |
| 19 |                                 |     | about its charter can be found, if not in the protocol. Alternatively, an explanation of why a DMC is not    |       |
| 20 |                                 |     | needed                                                                                                       |       |
| 21 |                                 |     |                                                                                                              |       |
| 22 |                                 | 21b | Description of any interim analyses and stopping guidelines, including who will have access to these interim | _____ |
| 23 |                                 |     | results and make the final decision to terminate the trial                                                   |       |
| 24 |                                 |     |                                                                                                              |       |
| 25 |                                 |     |                                                                                                              |       |
| 26 | Harms                           | 22  | Plans for collecting, assessing, reporting, and managing solicited and spontaneously reported adverse        | _____ |
| 27 |                                 |     | events and other unintended effects of trial interventions or trial conduct                                  |       |
| 28 |                                 |     |                                                                                                              |       |
| 29 | Auditing                        | 23  | Frequency and procedures for auditing trial conduct, if any, and whether the process will be independent     | _____ |
| 30 |                                 |     | from investigators and the sponsor                                                                           |       |
| 31 |                                 |     |                                                                                                              |       |
| 32 |                                 |     |                                                                                                              |       |
| 33 | <b>Ethics and dissemination</b> |     |                                                                                                              |       |
| 34 |                                 |     |                                                                                                              |       |
| 35 | Research ethics                 | 24  | Plans for seeking research ethics committee/institutional review board (REC/IRB) approval                    | _____ |
| 36 | approval                        |     |                                                                                                              |       |
| 37 |                                 |     |                                                                                                              |       |
| 38 | Protocol                        | 25  | Plans for communicating important protocol modifications (eg, changes to eligibility criteria, outcomes,     | _____ |
| 39 | amendments                      |     | analyses) to relevant parties (eg, investigators, REC/IRBs, trial participants, trial registries, journals,  |       |
| 40 |                                 |     | regulators)                                                                                                  |       |
| 41 |                                 |     |                                                                                                              |       |
| 42 |                                 |     |                                                                                                              |       |
| 43 |                                 |     |                                                                                                              |       |
| 44 |                                 |     |                                                                                                              |       |
| 45 |                                 |     |                                                                                                              |       |
| 46 |                                 |     |                                                                                                              |       |
| 47 |                                 |     |                                                                                                              |       |



|    |                      |     |                                                                                                                 |       |
|----|----------------------|-----|-----------------------------------------------------------------------------------------------------------------|-------|
| 1  | Consent or assent    | 26a | Who will obtain informed consent or assent from potential trial participants or authorised surrogates, and      | _____ |
| 2  |                      |     | how (see Item 32)                                                                                               |       |
| 3  |                      |     |                                                                                                                 |       |
| 4  |                      | 26b | Additional consent provisions for collection and use of participant data and biological specimens in ancillary  | _____ |
| 5  |                      |     | studies, if applicable                                                                                          |       |
| 6  |                      |     |                                                                                                                 |       |
| 7  | Confidentiality      | 27  | How personal information about potential and enrolled participants will be collected, shared, and maintained    | _____ |
| 8  |                      |     | in order to protect confidentiality before, during, and after the trial                                         |       |
| 9  |                      |     |                                                                                                                 |       |
| 10 | Declaration of       | 28  | Financial and other competing interests for principal investigators for the overall trial and each study site   | _____ |
| 11 | interests            |     |                                                                                                                 |       |
| 12 |                      |     |                                                                                                                 |       |
| 13 |                      |     |                                                                                                                 |       |
| 14 | Access to data       | 29  | Statement of who will have access to the final trial dataset, and disclosure of contractual agreements that     | _____ |
| 15 |                      |     | limit such access for investigators                                                                             |       |
| 16 |                      |     |                                                                                                                 |       |
| 17 | Ancillary and post-  | 30  | Provisions, if any, for ancillary and post-trial care, and for compensation to those who suffer harm from trial | _____ |
| 18 | trial care           |     | participation                                                                                                   |       |
| 19 |                      |     |                                                                                                                 |       |
| 20 | Dissemination policy | 31a | Plans for investigators and sponsor to communicate trial results to participants, healthcare professionals,     | _____ |
| 21 |                      |     | the public, and other relevant groups (eg, via publication, reporting in results databases, or other data       |       |
| 22 |                      |     | sharing arrangements), including any publication restrictions                                                   |       |
| 23 |                      |     |                                                                                                                 |       |
| 24 |                      |     |                                                                                                                 |       |
| 25 |                      | 31b | Authorship eligibility guidelines and any intended use of professional writers                                  | _____ |
| 26 |                      |     |                                                                                                                 |       |
| 27 |                      | 31c | Plans, if any, for granting public access to the full protocol, participant-level dataset, and statistical code | _____ |
| 28 |                      |     |                                                                                                                 |       |
| 29 |                      |     |                                                                                                                 |       |
| 30 | <b>Appendices</b>    |     |                                                                                                                 |       |
| 31 |                      |     |                                                                                                                 |       |
| 32 | Informed consent     | 32  | Model consent form and other related documentation given to participants and authorised surrogates              | _____ |
| 33 | materials            |     |                                                                                                                 |       |
| 34 |                      |     |                                                                                                                 |       |
| 35 | Biological           | 33  | Plans for collection, laboratory evaluation, and storage of biological specimens for genetic or molecular       | _____ |
| 36 | specimens            |     | analysis in the current trial and for future use in ancillary studies, if applicable                            |       |
| 37 |                      |     |                                                                                                                 |       |

38  
39 \*It is strongly recommended that this checklist be read in conjunction with the SPIRIT 2013 Explanation & Elaboration for important clarification on the items.  
40 Amendments to the protocol should be tracked and dated. The SPIRIT checklist is copyrighted by the SPIRIT Group under the Creative Commons  
41 "[Attribution-NonCommercial-NoDerivs 3.0 Unported](https://creativecommons.org/licenses/by-nc-nd/3.0/)" license.  
42  
43  
44

# BMJ Open

## A review of rate control in atrial fibrillation, and the rationale and protocol for the RATE-AF trial

|                                 |                                                                                                                                                                                                                                                                                                                                                                                                                                                                                                                                                                                                                                                                                                                                                                                                                                                                                                                                                                                                                                                                                                                                                                                                                                                                                                                                                                                                                                                                 |
|---------------------------------|-----------------------------------------------------------------------------------------------------------------------------------------------------------------------------------------------------------------------------------------------------------------------------------------------------------------------------------------------------------------------------------------------------------------------------------------------------------------------------------------------------------------------------------------------------------------------------------------------------------------------------------------------------------------------------------------------------------------------------------------------------------------------------------------------------------------------------------------------------------------------------------------------------------------------------------------------------------------------------------------------------------------------------------------------------------------------------------------------------------------------------------------------------------------------------------------------------------------------------------------------------------------------------------------------------------------------------------------------------------------------------------------------------------------------------------------------------------------|
| Journal:                        | <i>BMJ Open</i>                                                                                                                                                                                                                                                                                                                                                                                                                                                                                                                                                                                                                                                                                                                                                                                                                                                                                                                                                                                                                                                                                                                                                                                                                                                                                                                                                                                                                                                 |
| Manuscript ID                   | bmjopen-2016-015099.R2                                                                                                                                                                                                                                                                                                                                                                                                                                                                                                                                                                                                                                                                                                                                                                                                                                                                                                                                                                                                                                                                                                                                                                                                                                                                                                                                                                                                                                          |
| Article Type:                   | Protocol                                                                                                                                                                                                                                                                                                                                                                                                                                                                                                                                                                                                                                                                                                                                                                                                                                                                                                                                                                                                                                                                                                                                                                                                                                                                                                                                                                                                                                                        |
| Date Submitted by the Author:   | 29-Apr-2017                                                                                                                                                                                                                                                                                                                                                                                                                                                                                                                                                                                                                                                                                                                                                                                                                                                                                                                                                                                                                                                                                                                                                                                                                                                                                                                                                                                                                                                     |
| Complete List of Authors:       | <p>Kotecha, Dipak; University of Birmingham, Institute of Cardiovascular Sciences; University Hospitals Birmingham NHS Trust, Cardiology<br/>           Calvert, Melanie; University of Birmingham, Centre for Patient Reported Outcomes Research; University of Birmingham, Institute of Applied Health Research<br/>           Deeks, Jon; University of Birmingham, Birmingham Clinical Trials Unit; University of Birmingham, Institute of Applied Health Research<br/>           Griffith, Mike; University Hospitals Birmingham NHS Trust, Cardiology<br/>           Kirchhof, Paulus; University of Birmingham, Institute of Cardiovascular Sciences; Sandwell &amp; West Birmingham Hospitals NHS Trust, Cardiology<br/>           Lip, Gregory; University of Birmingham, Institute of Cardiovascular Sciences; Sandwell &amp; West Birmingham Hospitals NHS Trust, Cardiology<br/>           Mehta, Samir; University of Birmingham, Birmingham Clinical Trials Unit<br/>           Slinn, Gemma; University of Birmingham, Birmingham Clinical Trials Unit<br/>           Stanbury, Mary; (Lead for the patient involvement panel)<br/>           Steeds, Richard; University Hospitals Birmingham NHS Trust, Cardiology; University of Birmingham, Institute of Cardiovascular Sciences<br/>           Townend, Jonathan; University Hospitals Birmingham NHS Trust, Cardiology; University of Birmingham, Institute of Cardiovascular Sciences</p> |
| <b>Primary Subject Heading</b>: | Cardiovascular medicine                                                                                                                                                                                                                                                                                                                                                                                                                                                                                                                                                                                                                                                                                                                                                                                                                                                                                                                                                                                                                                                                                                                                                                                                                                                                                                                                                                                                                                         |
| Secondary Subject Heading:      | Evidence based practice, Medical management, Patient-centred medicine                                                                                                                                                                                                                                                                                                                                                                                                                                                                                                                                                                                                                                                                                                                                                                                                                                                                                                                                                                                                                                                                                                                                                                                                                                                                                                                                                                                           |
| Keywords:                       | Atrial fibrillation, heart rate, quality of life, Echocardiography < CARDIOLOGY, Protocols & guidelines < HEALTH SERVICES ADMINISTRATION & MANAGEMENT, RATE-AF                                                                                                                                                                                                                                                                                                                                                                                                                                                                                                                                                                                                                                                                                                                                                                                                                                                                                                                                                                                                                                                                                                                                                                                                                                                                                                  |
|                                 |                                                                                                                                                                                                                                                                                                                                                                                                                                                                                                                                                                                                                                                                                                                                                                                                                                                                                                                                                                                                                                                                                                                                                                                                                                                                                                                                                                                                                                                                 |

SCHOLARONE™  
Manuscripts

**Title: A review of rate control in atrial fibrillation,  
and the rationale and protocol for the RATE-  
AF trial**



Brief Title: Kotecha *et al*, Rate control therapy evaluation in atrial fibrillation

Authors: Dr Dipak Kotecha MBChB PhD MRCP FESC FHEA<sup>1,2,3,4\*</sup>, Prof Melanie Calvert BSc PhD FHEA<sup>4,5</sup>, Prof Jonathan J Deeks BSc MSc PhD CStat<sup>5,6</sup>, Dr Michael Griffith MD FRCP<sup>2</sup>, Prof Paulus Kirchhof MD FRCP FESC<sup>1,2,3,4</sup>, Prof Gregory YH Lip MD FRCP DFM FESC<sup>1,3,4</sup>, Samir Mehta MSc BSc<sup>6</sup>, Gemma Slinn BSc MPhil<sup>6</sup>, Mary Stanbury RGN RDN RHV\*\*, Dr Richard P Steeds MA MD FRCP FESC<sup>1,2</sup> and Prof Jonathan N Townend BSc MBChB MD FESC<sup>1,2</sup>.

From the (1) Institute of Cardiovascular Sciences, University of Birmingham, Birmingham, UK; (2) University Hospitals Birmingham NHS Trust, Birmingham, UK; (3) Sandwell & West Birmingham Hospitals NHS Trust, Birmingham, UK; (4) Centre for Patient Reported Outcomes Research, University of Birmingham, Birmingham, UK; (5) Institute of Applied Health Research, University of Birmingham, Birmingham, UK; and (6) Birmingham Clinical Trials Unit, University of Birmingham, Birmingham, UK. \* Authors after the Chief Investigator listed in alphabetical order. \*\* Lead for the Patient Involvement Panel.

Address for correspondence:

Dr Dipak Kotecha

University of Birmingham Institute of Cardiovascular Sciences, Medical School, Vincent Drive, Birmingham, B15 2TT, UK.

Email: [d.kotecha@bham.ac.uk](mailto:d.kotecha@bham.ac.uk) Tel: +44 121 371 8122 Fax: +44 121 554 4083

Word count (text): 2963

Word count (abstract): 300

1  
2 **Key Words:** Atrial fibrillation; heart rate; Protocols & guidelines<health services  
3  
4 administration & management; RATE-AF trial; quality of life;  
5  
6 echocardiography<cardiology.  
7  
8  
9  
10  
11  
12  
13  
14  
15  
16  
17  
18  
19  
20  
21  
22  
23  
24  
25  
26  
27  
28  
29  
30  
31  
32  
33  
34  
35  
36  
37  
38  
39  
40  
41  
42  
43  
44  
45  
46  
47  
48  
49  
50  
51  
52  
53  
54  
55  
56  
57  
58  
59  
60

For peer review only

## Abstract

**Background & Objective:** Atrial fibrillation (AF) is common and causes impaired quality of life, an increased risk of stroke and death, as well as frequent hospital admissions. The majority of patients with AF require control of heart rate. In this article we summarise the limited evidence from clinical trials that guides prescription, and present the rationale and protocol for a new randomised trial. As rate control has not yet been shown to reduce mortality, there is a clear need to compare the impact of therapy on quality of life, cardiac function and exercise capacity. Such a trial should concentrate on the longer-term effects of treatment in the largest proportion of AF patients, those with symptomatic permanent AF, with the aim of improving patient well-being.

**Design & Intervention:** The RAte control Therapy Evaluation in permanent Atrial Fibrillation (RATE-AF) trial will enrol 160 participants with a prospective, randomised, open-label, blinded end-point design comparing initial rate control with digoxin or bisoprolol. This will be the first head-to-head randomised trial of digoxin and beta-blockers in AF.

**Participants:** Recruited patients will be aged  $\geq 60$  years with permanent AF and symptoms of breathlessness (NYHA Class II or above), with few exclusion criteria to maximise generalisability to routine clinical practice.

**Outcome measures:** The primary outcome is patient-reported quality of life, with secondary outcomes including echocardiographic ventricular function, exercise capacity and biomarkers of cellular and clinical response. Follow-up will occur at 6 and 12 months, with feasibility components to inform the design of a future trial powered to detect a difference in hospital admission. The RATE-AF trial will underpin an integrated approach to management including biomarkers, function and symptoms that will guide future research into optimal, personalised rate control in patients with AF.

**Ethics and Dissemination:** East Midlands-Derby Research Ethics Committee (16/EM/0178); Peer-reviewed publications.

1  
2 **Trial registration:** [clinicaltrials.gov:NCT02391337](https://clinicaltrials.gov/ct2/show/study/NCT02391337); [ISRCTN:95259705](https://www.isrctn.com/ISRCTN95259705).  
3  
4  
5  
6  
7  
8  
9  
10  
11  
12  
13  
14  
15  
16  
17  
18  
19  
20  
21  
22  
23  
24  
25  
26  
27  
28  
29  
30  
31  
32  
33  
34  
35  
36  
37  
38  
39  
40  
41  
42  
43  
44  
45  
46  
47  
48  
49  
50  
51  
52  
53  
54  
55  
56  
57  
58  
59  
60

For peer review only

## Strengths and limitations of this study

- Control of heart rate is universally used in patients with atrial fibrillation, but evidence from good quality randomised trials is extremely limited.
- Despite common clinical use, there has never been a direct randomised comparison of beta-blockers and digoxin for heart rate control in AF patients (with or without heart failure).
- The RATE-AF trial will assess the effect of therapy on patient-reported quality of life, and improve methods to capture this information in patients with AF. The trial will also evaluate the longer-term impact on cardiac function, define reproducible methods to measure systolic and diastolic function in AF, and develop new biomarkers for personalisation of treatment.
- The trial will not have the power to identify differences in clinical events, but will allow us to plan a future trial designed to detect a difference in the need for admissions to hospital.

## Introduction

Atrial fibrillation (AF) is a common cause of stroke and cardiovascular death, leads to poor quality of life and doubles the risk of hospital admission.<sup>1</sup> We are currently in the midst of an epidemic of AF, with both incidence and prevalence expected to double in the next 20 years.<sup>2-4</sup> Although AF can affect any age-group, patients are typically elderly with significant comorbidities, including up to 50% suffering from heart failure.<sup>5</sup> AF is both a cause and consequence of heart failure, with complex interactions leading to impairment of systolic and diastolic function.<sup>6,7</sup> The combination of these two conditions is expected to have a dramatic impact on the burden of healthcare worldwide.<sup>8-11</sup>

Management of AF involves anticoagulation to prevent strokes, selecting appropriate patients for restoration of sinus rhythm and almost universal need for control of heart rate. In contrast to other management strategies, the choice of rate control therapy has a very low-quality evidence-base (**Figure 1**).<sup>12</sup> Guidelines from the National Institute for Health and Care Excellence (NICE) and the European Society of Cardiology (ESC) have mandated further research specifically on rate control<sup>1,13</sup>, which is also reflected in the level of recommendations from the American Heart Association.<sup>14</sup> The small studies currently available are often uncontrolled or with short follow-up<sup>15-19</sup>, providing few insights on the biological effects of treatment or the mechanisms underpinning the response to therapy. With no evidence for any impact of rate control on mortality<sup>20,21</sup>, and limited data for any difference in quality of life or functional outcomes, the choice of rate control agent is currently informed by expert consensus and physician experience.

In this paper, we review the current evidence-base for rate control in AF and the rationale for a new randomised controlled trial (RCT). The Rate control Therapy Evaluation in permanent Atrial Fibrillation (RATE-AF) trial will compare initial therapy with beta-blockers versus digoxin in older patients with symptomatic permanent AF, assessing quality of life, functional



1 capacity, left-ventricular ejection fraction (LVEF), diastolic function and biomarkers of  
2  
3 treatment response.  
4  
5  
6  
7  
8  
9

## 10 **Rationale for a new trial of rate control in AF**

### 11 **Why not choose a rhythm control strategy?**

12  
13  
14  
15  
16  
17 A number of RCTs have assessed the addition of rhythm control strategies to control of heart  
18 rate in AF patients, most often with anti-arrhythmic drugs (AAD) and direct current  
19 cardioversion. Neither of the two largest trials (AFFIRM or RACE) found any difference in  
20 clinical outcomes comparing these approaches.<sup>22 23</sup> Meta-analyses and other smaller trials have  
21 confirmed that rhythm control is not superior to regulation of heart rate alone,<sup>24-26</sup> including  
22 heart failure patients with both impaired and preserved ejection fraction.<sup>27 28</sup> These studies  
23 have analysed heterogeneous populations, including both paroxysmal and permanent AF that  
24 may differ with regards to mechanism, prognosis and the response to treatment.<sup>15</sup> However  
25 there is also evidence that a rhythm control strategy may increase hospital admissions. A meta-  
26 analysis of major published trials is presented in **Figure 2**, highlighting a 17% increase in the  
27 risk of hospitalisation in the rhythm control group (after exclusion of hospital visits related to  
28 cardioversion). Although limited by patient crossover and the association between AAD and  
29 adverse events,<sup>29</sup> the results highlight the importance of trials comparing different rate control  
30 options and associated healthcare costs.  
31  
32  
33  
34  
35  
36  
37  
38  
39  
40  
41  
42  
43  
44  
45  
46  
47

48 Although AF ablation is becoming increasingly popular, it remains a highly invasive  
49 method to restore sinus rhythm.<sup>30 31</sup> Current guidelines recommend ablation to improve AF-  
50 related symptoms in patients with paroxysmal AF, or as a treatment option in symptomatic  
51 persistent AF that is refractory to other therapy.<sup>1 14</sup> Long-term outcome studies are awaited and  
52 need to be balanced against procedural complications and AF recurrence. Even in patients  
53  
54  
55  
56  
57  
58  
59  
60

1 receiving intensive rhythm control therapy, rate control is often necessary to reduce symptoms  
2 during AF paroxysms. Further, 40-50% of AF patients are deemed as unsuitable for rhythm  
3 control (permanent AF),<sup>5,32</sup> and are maintained on rate control therapy to reduce potential  
4 symptoms and avoid tachycardia that may worsen ventricular function.<sup>6</sup> Patients with  
5 permanent AF have a higher residual risk of cardiovascular death, stroke or systemic  
6 embolism, despite anticoagulation.<sup>33</sup>

### **What is the optimal heart rate target in AF?**

7  
8  
9  
10  
11  
12  
13  
14  
15  
16  
17  
18  
19  
20 There is clinical uncertainty about how to control heart rate and the intensity of rate-reduction.  
21 In the RACE II trial of 614 randomised patients with permanent AF, there were no benefits of  
22 strict (<80 bpm at rest) compared to lenient rate control (resting heart rate <110 bpm) over 3  
23 years of follow-up.<sup>34</sup> Although interpretation was limited by the narrow difference in heart rate  
24 between groups, lenient rate control was found to be non-inferior with an adjusted hazard ratio  
25 of 0.80 (90% CI 0.55-1.17) for a wide composite of adverse clinical outcomes (12.9%,  
26 compared to 14.9% in the strict control arm). In addition, there were no differences in  
27 symptoms or NYHA class,<sup>34,35</sup> and patients achieving strict rate control required more clinic  
28 visits.<sup>36</sup> These findings are consistent with other trials,<sup>37-39</sup> registries,<sup>32</sup> and even randomized<sup>40</sup>  
29 and observational<sup>41</sup> cohorts in patients with concomitant heart failure, suggesting that intensity  
30 of heart rate control is not the key determinant of outcomes in AF.

### **Do outcomes vary with different rate control therapies?**

31  
32  
33  
34  
35  
36  
37  
38  
39  
40  
41  
42  
43  
44  
45  
46  
47  
48  
49 Medical therapy to achieve rate control in AF can be achieved with beta-blockers, digoxin and  
50 non-dihydropyridine calcium channel blockers (CCB; diltiazem or verapamil).<sup>1</sup> Only a limited  
51 evidence-base is available to assist clinicians in choosing first-line and subsequent therapy,  
52 resulting in wide variations in clinical practice<sup>42-44</sup> and frequent use of combination therapy.  
53  
54  
55  
56  
57  
58  
59  
60  
61 Guidelines suggest the choice of medication should be individualised, dependent on the

1 presence of ongoing symptoms.<sup>1 14</sup> However, these recommendations are based on low quality  
2 trials and observational data, often with small numbers of participants and follow-up over a  
3 few weeks.<sup>16</sup> There are no RCTs comparing long-term rate control options in AF.  
4  
5  
6  
7

8 Demonstrating any reduction in hard clinical outcomes with rate control has proved elusive. In  
9 patients with heart failure, reduced ejection fraction and concomitant AF, an individual patient  
10 level meta-analysis of double-blind RCT data has suggested that beta-blockers do not reduce  
11 all-cause mortality or hospital admissions compared to placebo<sup>20</sup>, in contrast to the substantial  
12 benefit seen in sinus rhythm.<sup>45</sup> Similarly, the use of digoxin was not associated with any  
13 increase, or reduction, in mortality in a comprehensive systematic review.<sup>21</sup> This finding  
14 deviates from prior observational analyses which are confounded by the fact that sicker  
15 patients tend to receive digoxin more often, which can only be addressed within a randomised  
16 trial. Although digoxin is known to reduce hospital admissions in patients with heart failure  
17 and reduced ejection fraction in sinus rhythm<sup>46</sup>, the impact in patients with AF is unknown.  
18  
19  
20  
21  
22  
23  
24  
25  
26  
27  
28  
29  
30  
31  
32

33 If rate control has limited effect on mortality, what about evidence for a differential effect on  
34 other outcomes, such as functional capacity, cardiac function or quality of life? Beta-blockers  
35 are the most commonly-used rate control agents and although they have a greater impact than  
36 digoxin on heart rate during exertion, there is no evidence that this results in better exercise  
37 capacity.<sup>17 18 47-49</sup> Beta-blockers were not associated with any improvement in arrhythmia-  
38 related symptoms in a small RCT of 60 low-risk patients with permanent AF, compared to  
39 diltiazem and verapamil which reduced the frequency of symptoms.<sup>50</sup> Those in the beta-  
40 blocker group had a reduction in exercise capacity and increase in B-type natriuretic peptide  
41 (BNP) compared to those treated with CCB.<sup>51</sup> Analysis of smaller trials comparing beta-  
42 blockers with CCB are inconsistent.<sup>17</sup> Compared to verapamil or diltiazem, digoxin has less  
43 effect on heart rate but there is no consistent evidence for any difference in functional  
44 outcomes.<sup>17 18 47 49 52</sup> Importantly, diltiazem and verapamil are usually avoided in patients with  
45  
46  
47  
48  
49  
50  
51  
52  
53  
54  
55  
56  
57  
58  
59  
60

1 reduced ejection fraction due to the risk of adverse outcomes,<sup>53-57</sup> leaving only beta-blockers or  
2 digoxin as suitable therapy. Only a single RCT has been published comparing beta-blockers  
3 with digoxin in patients with AF and heart failure (mean LVEF 24%, n=47).<sup>58</sup> Although there  
4 was a marginally-significant improvement in LVEF with combined carvedilol/digoxin versus  
5 placebo/digoxin, blinded withdrawal of digoxin then led to a deterioration in LVEF,  
6 accompanied by an increase in BNP. The direct effects of digoxin on LVEF and diastolic  
7 function have only been studied in patients with sinus rhythm, where digoxin increased LVEF  
8 by 3-11% and improved diastolic filling.<sup>59-61</sup> Magnesium has been shown to complement  
9 digoxin therapy to achieve lower ventricular rates in AF<sup>62</sup>, but is not in common use due to the  
10 availability of beta-blockers and CCB which are more potent agents for acute heart rate  
11 control.<sup>1</sup> Although data on patient-reported quality of life is limited,<sup>63 64</sup> rate control has been  
12 associated with improved quality of life in trials assessing rate versus rhythm control.<sup>65-67</sup> The  
13 mechanism by which rate control therapy mediates an increase in physical functioning and  
14 quality of life is unknown but conceivably due to improvements in LVEF and/or diastolic  
15 function.

16  
17  
18  
19  
20  
21  
22  
23  
24  
25  
26  
27  
28  
29  
30  
31  
32  
33  
34  
35  
36  
37 In summary, rate control is an important part of treatment in all AF patients but the evidence-  
38 base is poor, particularly in those with permanent AF who form the majority of patients in  
39 clinical practice. Rate control in AF is also subject to considerable, and poorly characterised  
40 individual variability in response, with limited information about the effects of therapy on  
41 cardiac function, quality of life and functional capacity.

## 52 **The RATE-AF trial**

53  
54  
55  
56 The RATE-AF trial is the first head-to-head randomised assessment of beta-blockers versus  
57 digoxin as the initial rate control agent in patients with AF. The trial has a prospective,  
58  
59  
60

1 randomised, open-label, investigator-blinded endpoint (PROBE) design, and is planned as an  
2 inclusive study that reflects and will have an important impact on clinical practice (see  
3 Information for Patients in **Table 1**). The primary outcome is patient-reported quality of life  
4 using the SF-36 physical component summary score at 6 months' post-randomisation. The  
5 major secondary outcomes are change in LVEF and diastolic function on echocardiography,  
6 functional capacity, global and AF-specific quality of life, and cardiovascular biomarkers  
7 (**Table 2**). A key objective of the trial is to improve the methods used for measuring quality of  
8 life in AF patients, as well as optimising the validity, reproducibility and acquisition of  
9 echocardiographic left-ventricular function. The RATE-AF trial will also act as a feasibility  
10 study to plan a future, event-driven clinical trial exploring the impact of different rate control  
11 strategies on cardiovascular events and unplanned hospital admissions. The study is sponsored  
12 by the University of Birmingham and funded by the National Institute for Health Research  
13 (NIHR), as part of a Career Development Fellowship awarded to the Chief Investigator (DK).

## 32 **Methods**

### 33 **Patients**

34 Inclusion criteria are patients aged 60 years or older with breathlessness (equivalent to New  
35 York Heart Association Class II or more) and permanent AF, characterised as a physician  
36 decision for rate control with no plans for cardioversion, AAD or ablation therapy. Only  
37 limited exclusion criteria apply (**Figure 3**), reflecting any clear requirements or  
38 contraindications for either beta-blockers or digoxin. As neither agent impacts on mortality in  
39 patients with heart failure<sup>20 21</sup>, reduced LVEF is not an exclusion criterion. All patients are  
40 expected to be anticoagulated if appropriate, according to their clinical risk of stroke and  
41 thromboembolism.

### **Study procedures and outcomes**

One hundred and sixty eligible patients in need of rate control will be invited to participate in the study from primary and secondary care across two major NHS Trusts in Birmingham, UK. The RATE-AF trial is managed by the Birmingham Clinical Trials Unit (BCTU; University of Birmingham) and situated within the Birmingham NIHR/Wellcome Trust Clinical Research Facility.

Following written informed consent, participants will be randomised in a 1:1 ratio to either bisoprolol or digoxin therapy. Randomisation will be provided by a computer-generated minimisation algorithm to ensure balance between the treatment arms for baseline European Heart Rhythm Association (EHRA) class and gender. Allocation will be concealed until the patient has been recruited and consented, thereafter the trial will be open-label.

Baseline assessment procedures will include patient-reported quality of life questionnaires (**Table 3**), 6-minute walk distance, echocardiography and biomarker assessment. Participants will then receive study medication (bisoprolol 1.25-15 milligrams once daily or low-dose digoxin 62.5-250 micrograms once daily), with scheduled uptitration visits to attain a heart rate at rest of  $\leq 100$  bpm. This heart rate is in line with international recommendations<sup>1</sup> and was chosen pragmatically to reflect the opinion of many cardiologists that tachycardia can lead to, or worsen, systolic and diastolic dysfunction. Ambulatory 24-hour ECG monitoring will be performed at the end of uptitration (unblinded). Investigator-blinded endpoints will be assessed at the interim (6 month) and final (12 month) visit, which include patient-reported quality of life, echocardiographic parameters of systolic and diastolic left-ventricular function and biomarker assessment (**Figure 3**).

### **Exploratory work and clinical practice improvement**

During the trial, qualitative research using focus groups and structured interviews will assess whether the quality of life questionnaires adequately and acceptably assess changes in

1 symptom burden in a sample of patients from each treatment arm. We will also compare and  
2  
3 contrast the generic and AF-specific questionnaires. The aim of this work is to improve the  
4  
5 methods used for measuring patient-reported outcomes in AF, and to address some of the  
6  
7 limitations we have identified in published validation studies.<sup>68</sup>  
8  
9

10 Optimal acquisition of echocardiography in patients with AF will be determined by  
11  
12 reproducibility studies, comparing repeated measures of systolic/diastolic function according to  
13  
14 cardiac cycle length. The RATE-AF trial will address the evidence-gaps we have identified in  
15  
16 a systematic review of echocardiography in patients with AF<sup>69</sup>, and explore the diagnostic  
17  
18 difficulty of categorising heart failure in the context of AF (particularly with preserved ejection  
19  
20 fraction, where symptom classification is confounded and BNP levels are consistently raised  
21  
22 due to AF<sup>7</sup>).  
23  
24

25  
26 Blood samples from participants will analysed for the cellular effects of rate control, including  
27  
28 intracellular sodium, calcium and endogenous cardiotoxic steroids (CTS) using photometry in  
29  
30 cultured human cardiomyocytes. This work will give mechanistic insight into the cellular  
31  
32 response to beta-blockers and digoxin, identify novel markers of treatment effect, and develop  
33  
34 assays that are more robust than serum digoxin concentration (SDC) for determining individual  
35  
36 patient dosage. SDC is an immunoassay known to be a poor marker of digoxin toxicity<sup>70</sup>,  
37  
38 which can cross-react with other targets<sup>71</sup> (for example, endogenous CTS). Although SDC will  
39  
40 be performed at six months follow-up and as required during the trial to advise clinicians on  
41  
42 dose and avoid high digoxin levels, digoxin toxicity remains a clinical diagnosis at present.  
43  
44 Serum will also be stored for the development of new blood-based and genetic biomarkers that  
45  
46 aid in personalisation of rate control therapy.  
47  
48  
49  
50  
51  
52

### 53 **Statistical considerations**

54

55 The null hypothesis is of no difference in the physical functioning domain of the SF-36 quality  
56  
57 of life questionnaire when comparing a strategy of digoxin versus beta-blocker therapy for  
58  
59  
60

1  
2  
3  
4  
5  
6  
7  
8  
9  
10  
11  
12  
13  
14  
15  
16  
17  
18  
19  
20  
21  
22  
23  
24  
25  
26  
27  
28  
29  
30  
31  
32  
33  
34  
35  
36  
37  
38  
39  
40  
41  
42  
43  
44  
45  
46  
47  
48  
49  
50  
51  
52  
53  
54  
55  
56  
57  
58  
59  
60

initial rate control in older patients with permanent AF. The alternative hypothesis is superiority of one over the other therapy as an initial strategy of care. Randomising 144 patients we can assume an 85% power to detect an effect size of half a standard deviation in a continuous outcome measure of quality of life (two-sided alpha of 0.05). Assuming that 10% of patients will be lost to follow-up, 160 patients are needed. There is some evidence from existing research to support the notion that the treatment effect could be this large. This includes a 17% improvement in SF-36 role-physical score in the rate control arm of the RACE study,<sup>66</sup> a 22% improvement in a proprietary symptom-checklist with CCB (compared to 8% change in those assigned beta-blockers),<sup>19</sup> and 17% improvement with rate control using SF-36 in the PIAF trial.<sup>67</sup> The RATE-AF trial will also us to explore surrogates for clinical outcomes, such as LVEF using echocardiography and B-type natriuretic peptide, and provide estimates for a future definitive trial of rate control in AF, including reliable information on recruitment rates, study drug titration, cross-over, retention and healthcare costs.

### **Trial oversight, management and registration**

RATE-AF will be conducted in accordance with guidelines for Good Clinical Practice (GCP) and the Declaration of Helsinki, and has regulatory approval from the Medicines and Healthcare products Regulatory Agency (MHRA).

Oversight will be provided by a Trial Steering Committee, comprising an independent Data Monitoring Committee and members of the RATE-AF Trial Management Group. This includes representatives of the patient and public involvement panel, involved in both the design and management of the trial. A Clinical Events Committee will be formed to adjudicate on adverse events.

The RATE-AF trial is registered at clinicaltrials.gov ([NCT02391337](https://clinicaltrials.gov/ct2/show/study/NCT02391337)), ISRCTN ([95259705](https://www.isrctn.com/ISRCTN95259705)) and EudraCT ([2015-005043-13](https://eudract.eu/number/2015-005043-13)). Further information can be obtained from the trial website, <http://www.birmingham.ac.uk/rate-af>, and the trial protocol (see **Appendix**). The protocol was



1 developed in accordance with the Standard Protocol Items for Randomized Trials [SPIRIT]  
2  
3 statement<sup>72</sup>, and the latest guidance from the International Society for Quality of Life Research  
4  
5 (ISOQOL) Best Practice taskforce.<sup>73-75</sup>  
6  
7  
8  
9

## 10 **Ethics and Dissemination**

11  
12  
13 The trial has ethical approval from the East Midlands - Derby Research Ethics Committee  
14 (16/EM/0178) and approval from the National Health Service (NHS) Health Research  
15 Authority (IRAS project ID: 191437).  
16  
17

18  
19  
20 The research findings will be submitted for publication to peer-reviewed journals after review  
21  
22 by the oversight committees and the Patient Involvement Panel, and presented to relevant  
23  
24 national and international meetings. Trial participants will be sent a lay summary of the final  
25  
26 results of the trial, written by the Patient Involvement Panel.  
27  
28  
29  
30  
31  
32  
33  
34  
35  
36  
37  
38  
39  
40  
41  
42  
43  
44  
45  
46  
47  
48  
49  
50  
51  
52  
53  
54  
55  
56  
57  
58  
59  
60

## Conclusion

Defining appropriate rate control therapy is vital, particularly in the rapidly growing number of older patients with permanent AF where current evidence is extremely limited. Rate control is an integral part of management in almost all AF patients but hardly any controlled trial evidence exists to guide the choice of agents. This is unacceptable in light of the potential benefits and possible adverse effects of treatment. In addition, the complete lack of data on the impact of medical therapy on symptom burden and heart function necessitate a programme of reproducibility and validity of both patient-reported quality of life and cardiac imaging in AF. The RATE-AF trial will answer key clinical questions about how to initiate therapy in order to improve patient well-being, stratified by relevant patient characteristics such as baseline symptoms, systolic and diastolic cardiac function, and biomarkers of treatment effect.

## Acknowledgements

We would like to acknowledge other members of the wider RATE-AF team, including Karina Bunting, Patience Domingos, Dannie Fobian, Margaret Grant, Emma Hayes, Hannah Lack, Susan Jowett, Jonathan Mathers, and Davor Pavlovic (University of Birmingham). We are indebted to the independent members of the trial oversight committees, as well as the Patient and Public Involvement (PPI) Team.

### Competing interests

None of the authors report a conflict of interest. All authors have completed the ICMJE uniform disclosure form ([www.icmje.org/coi\\_disclosure.pdf](http://www.icmje.org/coi_disclosure.pdf)) and declare:

DK reports grants from Menarini, during the conduct of the study; non-financial support from Daiichi Sankyo and personal fees from AtriCure, outside the submitted work. MC reports grants from the National Institute of Health Research, during the conduct of the study; and personal fees from Astella Pharma and Ferring Pharma, outside the submitted work. PK reports consulting fees and honoraria from Bayer Healthcare, Boehringer Ingelheim, Bristol-Myers Squibb, Daiichi-Sankyo, Medtronic, Pfizer and Servier, all outside the submitted work; research grants from Bristol-Myers Squibb, Pfizer, Cardiovascular Therapeutics, Daiichi Sankyo, Sanofi, St. Jude Medical, German Federal Ministry for Education and Research (BMBF), Fondation Leducq, German Research Foundation (DFG), European Union, British Heart Foundation and Medical Research Council UK, all outside the submitted work; and is listed on two patent applications on AF therapy and markers for AF, both outside the submitted work. GYHL has served as a consultant for Bayer, Astellas, Merck, AstraZeneca, Sanofi, BMS/Pfizer, Biotronik, Portola and Boehringer Ingelheim, and has been on the speaker's bureau for Bayer, BMS/Pfizer, Boehringer Ingelheim, and Sanofi-Aventis. RPS is the President of the British Society of Echocardiography. JJD, MG, MS, JNT, SM, GS report no

1  
2 competing interests.  
3  
4  
5

6 **Authors' contributions**  
7

8  
9 The manuscript was drafted by DK who is the Chief Investigator for the RATE-AF trial. MG  
10 and GYHL are Principal Investigators. MC, PK, RPS and JNT are members of the Trial  
11 Management Group. JJD, SM and GS are representatives from the Clinical Trials Unit. MS is  
12 the Lead for the Patient Involvement Panel, and a member of the Steering Committee. All  
13 authors contributed to the writing of the RATE-AF protocol or patient information, and edited  
14 this manuscript for intellectual content.  
15  
16  
17  
18  
19  
20  
21  
22  
23

24 **Funding**  
25

26  
27 DK and the RATE-AF trial are supported by the National Institute of Health Research (NIHR)  
28 as part of a Career Development Fellowship (CDF-2015-08-074). The opinions expressed in  
29 this paper are those of the authors and do not represent the NIHR or the UK Department of  
30 Health.  
31  
32  
33  
34  
35  
36  
37

38 **Data Sharing Statement**  
39

40 No additional data available at this time.  
41  
42  
43  
44  
45  
46  
47  
48  
49  
50  
51  
52  
53  
54  
55  
56  
57  
58  
59  
60

## References

1. Kirchhof P, Benussi S, Kotecha D, et al. 2016 ESC Guidelines for the management of atrial fibrillation developed in collaboration with EACTS. *Eur Heart J* 2016;37:2893-962.
2. Chugh SS, Havmoeller R, Narayanan K, et al. Worldwide epidemiology of atrial fibrillation: a Global Burden of Disease 2010 Study. *Circulation* 2014;129:837-47.
3. Krijthe BP, Kunst A, Benjamin EJ, et al. Projections on the number of individuals with atrial fibrillation in the European Union, from 2000 to 2060. *Eur Heart J* 2013;34:2746-51.
4. Lane DA, Skøjth F, Larsen TB, Lip GYH, Kotecha D. Temporal trends in atrial fibrillation incidence, comorbidity and mortality: comprehensive linked data from primary care. *J Am Heart Assoc* 2017; 10.1161/JAHA.116.005155.
5. Chiang CE, Naditch-Brule L, Murin J, et al. Distribution and risk profile of paroxysmal, persistent, and permanent atrial fibrillation in routine clinical practice: insight from the real-life global survey evaluating patients with atrial fibrillation international registry. *Circ Arrhythm Electrophysiol* 2012;5:632-9.
6. Kotecha D, Piccini JP. Atrial fibrillation in heart failure: what should we do? *Eur Heart J* 2015;36:3250-7.
7. Kotecha D, Lam CS, Van Veldhuisen DJ, Van Gelder IC, Voors AA, Rienstra M. Heart failure with preserved ejection fraction and atrial fibrillation: Vicious twins. *J Am Coll Cardiol* 2016;68:2217-28.
8. Kotecha D, Banerjee A, Lip GY. Increased stroke risk in atrial fibrillation patients with heart failure: does ejection fraction matter? *Stroke* 2015;46:608-9.
9. Christiansen CB, Olesen JB, Gislason G, Lock-Hansen M, Torp-Pedersen C. Cardiovascular and non-cardiovascular hospital admissions associated with atrial fibrillation: a Danish nationwide, retrospective cohort study. *BMJ Open* 2013;3.
10. Ambrosy AP, Fonarow GC, Butler J, et al. The global health and economic burden of hospitalizations for heart failure: lessons learned from hospitalized heart failure registries. *J Am Coll Cardiol* 2014;63:1123-33.
11. Kotecha D, Chudasama R, Lane DA, Kirchhof P, Lip GY. Atrial fibrillation and heart

- 1 failure due to reduced versus preserved ejection fraction: A systematic review and  
2 meta-analysis of death and adverse outcomes. *Int J Cardiol* 2016;203:660-6.  
3  
4  
5  
6 12. Kirchhof P, Breithardt G, Bax J, et al. A roadmap to improve the quality of atrial  
7 fibrillation management: proceedings from the fifth Atrial Fibrillation  
8 Network/European Heart Rhythm Association consensus conference. *Europace*  
9 2016;18:37-50.  
10  
11  
12  
13 13. National Institute for Health and Care Excellence. Atrial fibrillation: the management of  
14 atrial fibrillation. *NICE clinical guideline 180* 2014; Accessed 15/09/2016;  
15 <http://www.nice.org.uk/guidance/cg180/>.  
16  
17  
18  
19 14. January CT, Wann LS, Alpert JS, et al. 2014 AHA/ACC/HRS guideline for the  
20 management of patients with atrial fibrillation: executive summary: a report of the  
21 American College of Cardiology/American Heart Association Task Force on practice  
22 guidelines and the Heart Rhythm Society. *Circulation* 2014;130:2071-104.  
23  
24  
25  
26  
27 15. Kotecha D, Kirchhof P. Rate and rhythm control have comparable effects on mortality and  
28 stroke in atrial fibrillation but better data are needed. *Evid Based Med* 2014;19:222-3.  
29  
30  
31  
32 16. Segal JB, McNamara RL, Miller MR, et al. The evidence regarding the drugs used for  
33 ventricular rate control. *J Fam Practice*, 2000;47-59.  
34  
35  
36 17. Nikolaidou T, Channer KS. Chronic atrial fibrillation: a systematic review of medical heart  
37 rate control management. *Postgrad Med J* 2009;85:303-12.  
38  
39  
40 18. Farshi R, Kistner D, Sarma JSM, Longmate JA, Singh BN. Ventricular rate control in  
41 chronic atrial fibrillation during daily activity and programmed exercise: a crossover  
42 open-label study of five drug regimens. *J Am Coll Cardiol* 1999;33:304-10.  
43  
44  
45  
46 19. Ulimoen SR, Enger S, Carlson J, et al. Comparison of four single-drug regimens on  
47 ventricular rate and arrhythmia-related symptoms in patients with permanent atrial  
48 fibrillation. *Am J Cardiol* 2013;111:225-30.  
49  
50  
51  
52 20. Kotecha D, Holmes J, Krum H, et al. Efficacy of beta blockers in patients with heart failure  
53 plus atrial fibrillation: an individual-patient data meta-analysis. *Lancet* 2014;384:2235-  
54 43.  
55  
56  
57  
58 21. Ziff OJ, Lane DA, Samra M, et al. Safety and efficacy of digoxin: systematic review and  
59  
60

- 1 meta-analysis of observational and controlled trial data. *BMJ* 2015;351:h4451.
- 2
- 3
- 4 22. Wyse DG, Waldo AL, DiMarco JP, et al. A comparison of rate control and rhythm control
- 5 in patients with atrial fibrillation. *N Engl J Med* 2002;347:1825-33.
- 6
- 7
- 8 23. Van Gelder IC, Hagens VE, Bosker HA, et al. A Comparison of Rate Control and Rhythm
- 9 Control in Patients with Recurrent Persistent Atrial Fibrillation. *N Engl J Med*
- 10 2002;347:1834-40.
- 11
- 12
- 13 24. de Denus S, Sanoski CA, Carlsson J, Opolski G, Spinler SA. Rate vs rhythm control in
- 14 patients with atrial fibrillation: a meta-analysis. *Arch Intern Med* 2005;165:258-62.
- 15
- 16
- 17 25. Chatterjee S, Sardar P, Lichstein E, Mukherjee D, Aikat S. Pharmacologic rate versus
- 18 rhythm-control strategies in atrial fibrillation: an updated comprehensive review and
- 19 meta-analysis. *PACE* 2013;36:122-33.
- 20
- 21
- 22 26. Al-Khatib SM, Allen LaPointe NM, Chatterjee R, et al. Rate- and rhythm-control therapies
- 23 in patients with atrial fibrillation: a systematic review. *Ann Intern Med* 2014;160:760-
- 24 73.
- 25
- 26
- 27 27. Roy D, Talajic M, Nattel S, et al. Rhythm Control versus Rate Control for Atrial
- 28 Fibrillation and Heart Failure. *N Engl J Med* 2008;358:2667-77.
- 29
- 30
- 31 28. Kong MH, Shaw LK, O'Connor C, Califf RM, Blazing MA, Al-Khatib SM. Is rhythm-
- 32 control superior to rate-control in patients with atrial fibrillation and diastolic heart
- 33 failure? *Ann Noninvasive Electrocardiol* 2010;15:209-17.
- 34
- 35
- 36 29. Corley SD, Epstein AE, DiMarco JP, et al. Relationships between sinus rhythm, treatment,
- 37 and survival in the Atrial Fibrillation Follow-Up Investigation of Rhythm Management
- 38 (AFFIRM) Study. *Circulation* 2004;109:1509-13.
- 39
- 40
- 41 30. Wazni O, Wilkoff B, Saliba W. Catheter Ablation for Atrial Fibrillation. *N Engl J Med*
- 42 2011;365:2296-304.
- 43
- 44
- 45 31. Jones DG, Haldar SK, Hussain W, et al. A randomized trial to assess catheter ablation
- 46 versus rate control in the management of persistent atrial fibrillation in heart failure. *J*
- 47 *Am Coll Cardiol* 2013;61:1894-903.
- 48
- 49
- 50 32. Kirchhof P, Ammentorp B, Darius H, et al. Management of atrial fibrillation in seven
- 51 European countries after the publication of the 2010 ESC Guidelines on atrial
- 52
- 53
- 54
- 55
- 56
- 57
- 58
- 59
- 60

- 1  
2  
3  
4  
5  
6  
7  
8  
9  
10  
11  
12  
13  
14  
15  
16  
17  
18  
19  
20  
21  
22  
23  
24  
25  
26  
27  
28  
29  
30  
31  
32  
33  
34  
35  
36  
37  
38  
39  
40  
41  
42  
43  
44  
45  
46  
47  
48  
49  
50  
51  
52  
53  
54  
55  
56  
57  
58  
59  
60
- fibrillation: primary results of the PREvention of thromboemolic events--European Registry in Atrial Fibrillation (PREFER in AF). *Europace* 2014;16:6-14.
33. Senoo K, Lip GY, Lane DA, Buller HR, Kotecha D. Residual risk of stroke and death in anticoagulated patients according to the type of atrial fibrillation: AMADEUS Trial. *Stroke* 2015;46:2523-8.
34. Van Gelder IC, Groenveld HF, Crijns HJGM, et al. Lenient versus Strict Rate Control in Patients with Atrial Fibrillation. *N Engl J Med* 2010;362:1363-73.
35. Groenveld HF, Crijns HJGM, Van den Berg MP, et al. The Effect of Rate Control on Quality of Life in Patients With Permanent Atrial Fibrillation: Data From the RACE II (Rate Control Efficacy in Permanent Atrial Fibrillation II) Study. *J Am Coll Cardiol* 2011;58:1795-803.
36. Groenveld HF, Tijssen JG, Crijns HJ, et al. Rate control efficacy in permanent atrial fibrillation: successful and failed strict rate control against a background of lenient rate control: data from RACE II (Rate Control Efficacy in Permanent Atrial Fibrillation). *J Am Coll Cardiol* 2013;61:741-8.
37. Van Gelder IC, Wyse DG, Chandler ML, et al. Does intensity of rate-control influence outcome in atrial fibrillation? An analysis of pooled data from the RACE and AFFIRM studies. *Europace* 2006;8:935-42.
38. Cooper HA, Bloomfield DA, Bush DE, et al. Relation between achieved heart rate and outcomes in patients with atrial fibrillation (from the Atrial Fibrillation Follow-up Investigation of Rhythm Management [AFFIRM] Study). *Am J Cardiol* 2004;93:1247-53.
39. Groenveld HF, Crijns HJ, Rienstra M, et al. Does intensity of rate control influence outcome in persistent atrial fibrillation? Data of the RACE study. *Am Heart J* 2009;158:785-91.
40. Kotecha D, Flather MD, Altman DG, et al. Heart rate, heart rhythm and prognostic benefits of beta-blockers in heart failure: individual patient-data meta-analysis. *J Am Coll Cardiol* 2017; 10.1016/j.jacc.2017.04.001.
41. Cullington D, Goode KM, Zhang J, Cleland JG, Clark AL. Is heart rate important for patients with heart failure in atrial fibrillation? *JACC Heart Fail* 2014;2:213-20.



- 1  
2  
3  
4  
5  
6  
7  
8  
9  
10  
11  
12  
13  
14  
15  
16  
17  
18  
19  
20  
21  
22  
23  
24  
25  
26  
27  
28  
29  
30  
31  
32  
33  
34  
35  
36  
37  
38  
39  
40  
41  
42  
43  
44  
45  
46  
47  
48  
49  
50  
51  
52  
53  
54  
55  
56  
57  
58  
59  
60
42. Steg PG, Alam S, Chiang C-E, et al. Symptoms, functional status and quality of life in patients with controlled and uncontrolled atrial fibrillation: data from the RealiseAF cross-sectional international registry. *Heart* 2012;98:195-201.
43. Nabauer M, Gerth A, Limbourg T, et al. The Registry of the German Competence NETwork on Atrial Fibrillation: patient characteristics and initial management. *Europace* 2009;11:423-34.
44. Lip GY, Laroche C, Dan GA, et al. A prospective survey in European Society of Cardiology member countries of atrial fibrillation management: baseline results of EURObservational Research Programme Atrial Fibrillation (EORP-AF) Pilot General Registry. *Europace* 2014;16:308-19.
45. Kotecha D, Manzano L, Krum H, et al. Effect of age and sex on efficacy and tolerability of beta blockers in patients with heart failure with reduced ejection fraction: individual patient data meta-analysis. *BMJ* 2016;353:i1855.
46. The Digitalis Investigation Group. The effect of digoxin on mortality and morbidity in patients with heart failure. *N Engl J Med* 1997;336:525-33.
47. Koh KK, Kwon KS, Park HB, et al. Efficacy and safety of digoxin alone and in combination with low-dose diltiazem or betaxolol to control ventricular rate in chronic atrial fibrillation. *Am J Cardiol* 1995;75:88-90.
48. Lewis RV, McMurray J, McDevitt DG. Effects of atenolol, verapamil, and xamoterol on heart rate and exercise tolerance in digitalised patients with chronic atrial fibrillation. *J Cardiovasc Pharmacol* 1989;13:1-6.
49. Tsuneda T, Yamashita T, Fukunami M, et al. Rate control and quality of life in patients with permanent atrial fibrillation: the Quality of Life and Atrial Fibrillation (QOLAF) Study. *Circ J* 2006;70:965-70.
50. Ulimoen SR, Enger S, Carlson J, et al. Comparison of four single-drug regimens on ventricular rate and arrhythmia-related symptoms in patients with permanent atrial fibrillation. *Am J Cardiol* 2013;111:225-30.
51. Ulimoen SR, Enger S, Pripp AH, et al. Calcium channel blockers improve exercise capacity and reduce N-terminal Pro-B-type natriuretic peptide levels compared with beta-blockers in patients with permanent atrial fibrillation. *Eur Heart J* 2014;35:517-

- 1  
2  
3  
4  
5  
6  
7  
8  
9  
10  
11  
12  
13  
14  
15  
16  
17  
18  
19  
20  
21  
22  
23  
24  
25  
26  
27  
28  
29  
30  
31  
32  
33  
34  
35  
36  
37  
38  
39  
40  
41  
42  
43  
44  
45  
46  
47  
48  
49  
50  
51  
52  
53  
54  
55  
56  
57  
58  
59  
60
- 24.
52. Lewis RV, Irvine N, McDevitt DG. Relationships between heart rate, exercise tolerance and cardiac output in atrial fibrillation: the effects of treatment with digoxin, verapamil and diltiazem. *Eur Heart J* 1988;9:777-81.
53. McMurray JJ, Adamopoulos S, Anker SD, et al. ESC Guidelines for the diagnosis and treatment of acute and chronic heart failure 2012: The Task Force for the Diagnosis and Treatment of Acute and Chronic Heart Failure 2012 of the European Society of Cardiology. Developed in collaboration with the Heart Failure Association (HFA) of the ESC. *Eur Heart J* 2012;33:1787-847.
54. Elkayam U. Calcium channel blockers in heart failure. *Cardiology* 1998;89 Suppl 1:38-46.
55. The effect of diltiazem on mortality and reinfarction after myocardial infarction. The Multicenter Diltiazem Postinfarction Trial Research Group. *N Engl J Med* 1988;319:385-92.
56. Goldstein RE, Boccuzzi SJ, Cruess D, Nattel S. Diltiazem increases late-onset congestive heart failure in postinfarction patients with early reduction in ejection fraction. *Circulation* 1991;83:52-60.
57. The Danish Study Group on Verapamil in Myocardial Infarction. Secondary prevention with verapamil after myocardial infarction. *Am J Cardiol* 1990;66:33-40.
58. Khand AU, Rankin AC, Martin W, Taylor J, Gemmell I, Cleland JG. Carvedilol alone or in combination with digoxin for the management of atrial fibrillation in patients with heart failure? *J Am Coll Cardiol* 2003;42:1944-51.
59. Partanen J, Heikkila J, Pellinen T, Nieminen MS. Effect of digoxin on the heart in normal subjects: influence of isometric exercise and autonomic blockade: a noninvasive study. *Br J Clin Pharmacol* 1988;25:331-40.
60. Dernellis JM, Panaretou MP. Effects of digoxin on left atrial function in heart failure. *Heart* 2003;89:1308-15.
61. Giunta A, Maione S, Arnese MR, et al. Effects of intravenous digoxin on pulmonary venous and transmitral flows in patients with chronic heart failure of different degrees. *Clin Cardiol* 1995;18:27-33.

- 1  
2  
3  
4  
5  
6  
7  
8  
9  
10  
11  
12  
13  
14  
15  
16  
17  
18  
19  
20  
21  
22  
23  
24  
25  
26  
27  
28  
29  
30  
31  
32  
33  
34  
35  
36  
37  
38  
39  
40  
41  
42  
43  
44  
45  
46  
47  
48  
49  
50  
51  
52  
53  
54  
55  
56  
57  
58  
59  
60
62. Kotecha D. Magnesium for Atrial Fibrillation, Myth or Magic? *Circ Arrhythm Electrophysiol* 2016;9.
63. Thrall G, Lane D, Carroll D, Lip GYH. Quality of Life in Patients with Atrial Fibrillation: A Systematic Review. *Am J Med* 2006;119:448.e1-19.
64. Rienstra M, Lubitz SA, Mahida S, et al. Symptoms and Functional Status of Patients With Atrial Fibrillation: State of the Art and Future Research Opportunities. *Circulation* 2012;125:2933-43.
65. Pepine CJ. Effects of pharmacologic therapy on health-related quality of life in elderly patients with atrial fibrillation: a systematic review of randomized and nonrandomized trials. *Clin Med Insights Cardiol* 2013;7:1-20.
66. Hagens VE, Ranchor AV, Van Sonderen E, et al. Effect of rate or rhythm control on quality of life in persistent atrial fibrillation: Results from the Rate Control Versus Electrical Cardioversion (RACE) study. *J Am Coll Cardiol* 2004;43:241-47.
67. Grönefeld GC, Lilienthal J, Kuck K-H, Hohnloser SH. Impact of rate versus rhythm control on quality of life in patients with persistent atrial fibrillation: Results from a prospective randomized study. *Eur Heart J* 2003;24:1430-36.
68. Kotecha D, Ahmed A, Calvert M, Lencioni M, Terwee CB, Lane DA. Patient-reported outcomes for quality of life assessment in atrial fibrillation: A systematic review of measurement properties. *PLoS ONE* 2016;11:e0165790.
69. Kotecha D, Mohamed M, Shantsila E, Popescu BA, Steeds RP. Is echocardiography valid and reproducible in patients with atrial fibrillation? A systematic review. *Europace* 2017; 10.1093/europace/eux027.
70. Ziff OJ, Kotecha D. Digoxin: The good and the bad. *Trends Cardiovasc Med* 2016;26:585-95.
71. Dasgupta A. Impact of interferences including metabolite crossreactivity on therapeutic drug monitoring results. *Ther Drug Monit* 2012;34:496-506.
72. Chan AW, Tetzlaff JM, Gøtzsche PC, et al. SPIRIT 2013 explanation and elaboration: guidance for protocols of clinical trials. *BMJ* 2013;346:e7586.
73. Calvert M, Kyte D, von Hildebrand M, King M, Moher D. Putting patients at the heart of

- 1 health-care research. *Lancet* 2015;385:1073-74.
- 2
- 3
- 4 74. Calvert M, Kyte D, Duffy H, et al. Patient-reported outcome (PRO) assessment in clinical
- 5 trials: a systematic review of guidance for trial protocol writers. *PLoS One*
- 6 2014;9:e110216.
- 7
- 8
- 9
- 10 75. Kyte D, Duffy H, Fletcher B, et al. Systematic evaluation of the patient-reported outcome
- 11 (PRO) content of clinical trial protocols. *PLoS One* 2014;9:e110229.
- 12
- 13
- 14 76. Ware JE, Gandek B. Overview of the SF-36 Health Survey and the International Quality of
- 15 Life Assessment (IQOLA) Project. *J Clin Epidemiol* 1998;51:903-12.
- 16
- 17
- 18
- 19 77. Gandek B, Sinclair SJ, Kosinski M, Ware JE, Jr. Psychometric evaluation of the SF-36
- 20 health survey in Medicare managed care. *Health Care Financ Rev* 2004;25:5-25.
- 21
- 22
- 23 78. Herdman M, Gudex C, Lloyd A, et al. Development and preliminary testing of the new
- 24 five-level version of EQ-5D (EQ-5D-5L). *Qual Life Res* 2011;20:1727-36.
- 25
- 26
- 27
- 28 79. Devlin NJ, Krabbe PF. The development of new research methods for the valuation of EQ-
- 29 5D-5L. *Eur J Health Econ* 2013;14 Suppl 1:S1-3.
- 30
- 31
- 32 80. Janssen MF, Pickard AS, Golicki D, et al. Measurement properties of the EQ-5D-5L
- 33 compared to the EQ-5D-3L across eight patient groups: a multi-country study. *Qual*
- 34 *Life Res* 2013;22:1717-27.
- 35
- 36
- 37
- 38 81. Spertus J, Dorian P, Bubien R, et al. Development and validation of the Atrial Fibrillation
- 39 Effect on QualiTy-of-Life (AFEQT) Questionnaire in patients with atrial fibrillation.
- 40 *Circ Arrhythm Electrophysiol* 2011;4:15-25.
- 41
- 42
- 43 82. Dorian P, Burk C, Mullin CM, et al. Interpreting changes in quality of life in atrial
- 44 fibrillation: How much change is meaningful? *Am Heart J* 2013;166:381-87.e8.
- 45
- 46
- 47
- 48 83. Wynn GJ, Todd DM, Webber M, et al. The European Heart Rhythm Association symptom
- 49 classification for atrial fibrillation: validation and improvement through a simple
- 50 modification. *Europace* 2014;16:965-72.
- 51
- 52
- 53
- 54 84. Carlsson J, Miketic S, Windeler J, et al. Randomized trial of rate-control versus rhythm-
- 55 control in persistent atrial fibrillation: the Strategies of Treatment of Atrial Fibrillation
- 56 (STAF) study. *J Am Coll Cardiol* 2003;41:1690-6.
- 57
- 58
- 59
- 60

- 1  
2  
3  
4  
5  
6  
7  
8  
9  
10  
11  
12  
13  
14  
15  
16  
17  
18  
19  
20  
21  
22  
23  
24  
25  
26  
27  
28  
29  
30  
31  
32  
33  
34  
35  
36  
37  
38  
39  
40  
41  
42  
43  
44  
45  
46  
47  
48  
49  
50  
51  
52  
53  
54  
55  
56  
57  
58  
59  
60
85. Hohnloser SH, Kuck KH, Lilienthal J. Rhythm or rate control in atrial fibrillation--  
Pharmacological Intervention in Atrial Fibrillation (PIAF): a randomised trial. *Lancet*  
2000;356:1789-94.
86. Opolski G, Torbicki A, Kosior DA, et al. Rate control vs rhythm control in patients with  
nonvalvular persistent atrial fibrillation: the results of the Polish How to Treat Chronic  
Atrial Fibrillation (HOT CAFE) Study. *Chest* 2004;126:476-86.
87. Vora A, Karnad D, Goyal V, et al. Control of heart rate versus rhythm in rheumatic atrial  
fibrillation: a randomized study. *J Cardiovasc Pharmacol Ther* 2004;9:65-73.

Table 1: The RATE-AF trial – Information for Patients

|                                                                                                                                                                                                                                                                                                                                                                                                                                                                                                                                                                                  |
|----------------------------------------------------------------------------------------------------------------------------------------------------------------------------------------------------------------------------------------------------------------------------------------------------------------------------------------------------------------------------------------------------------------------------------------------------------------------------------------------------------------------------------------------------------------------------------|
| <b>About atrial fibrillation</b>                                                                                                                                                                                                                                                                                                                                                                                                                                                                                                                                                 |
| Atrial fibrillation is a common heart condition that leads to an irregular and often rapid heart rate. Atrial fibrillation causes 1 in 4 strokes, and patients have frequent hospital admissions and a higher risk of dying. In addition, atrial fibrillation makes many patients feel unwell, with reduced quality of life.                                                                                                                                                                                                                                                     |
| <b>What is the purpose of the trial?</b>                                                                                                                                                                                                                                                                                                                                                                                                                                                                                                                                         |
| Atrial fibrillation usually requires medication to control heart rate, but we currently don't know which medication is better for patients. The aim of this study is to find out which of two treatments improves quality of life and the function of the heart, digoxin or bisoprolol (a beta-blocker).                                                                                                                                                                                                                                                                         |
| <b>What will happen in the trial?</b>                                                                                                                                                                                                                                                                                                                                                                                                                                                                                                                                            |
| The RATE-AF trial is designed to compare two approaches for control of heart rate, based on initial treatment with either digoxin or beta-blockers, medications which are commonly used by doctors. The main objective of the trial is to research the effects of treatment on quality of life in patients with atrial fibrillation. We will also test whether quality of life questionnaires respond to changes in symptoms experienced by patients, how we use ultrasound to look at the function of the heart, and develop new markers in the blood to personalise treatment. |
| <b>More information</b>                                                                                                                                                                                                                                                                                                                                                                                                                                                                                                                                                          |
| RATE-AF trial video: <a href="https://www.youtube.com/watch?v=4oxe8AcVo0E">https://www.youtube.com/watch?v=4oxe8AcVo0E</a> or search 'rateaf' in YouTube.                                                                                                                                                                                                                                                                                                                                                                                                                        |
| Patient information (British Heart Foundation): <a href="https://www.bhf.org.uk/heart-health/conditions/atrial-fibrillation">https://www.bhf.org.uk/heart-health/conditions/atrial-fibrillation</a> .                                                                                                                                                                                                                                                                                                                                                                            |

Table 2: Outcomes and objectives of the RATE-AF trial

|                                                                                                                                                                                                                                                          |
|----------------------------------------------------------------------------------------------------------------------------------------------------------------------------------------------------------------------------------------------------------|
| <b>Primary outcome:</b>                                                                                                                                                                                                                                  |
| Comparison of two strategies for rate control on patient-reported quality of life, based on initial use of digoxin versus beta-blocker therapy, with a predefined focus on physical well-being using the SF-36 physical component summary at six months. |
| <b>Secondary outcomes:</b>                                                                                                                                                                                                                               |
| Patient-reported quality of life at six and twelve months, including SF-36 global and domain-specific scores, EQ-5D-5L summary index and visual analogue scale, and AFEQT overall score.                                                                 |
| Echocardiographic left-ventricular function at 12 months, including LVEF and diastolic function (E/e' and composite of diastolic indices).                                                                                                               |
| Functional assessment at 6 and 12 months, including six-minute walking distance and change in EHRA class.                                                                                                                                                |
| Change in BNP levels at 6 months.                                                                                                                                                                                                                        |
| Change in heart rate from baseline and group comparison using 24-hour ambulatory ECG at end of uptitration.                                                                                                                                              |
| <b>Feasibility assessment:</b>                                                                                                                                                                                                                           |
| Successful methods for recruitment across primary and secondary care.                                                                                                                                                                                    |
| Key issues that affect retention of participants, such as convenience, compliance and cross-over.                                                                                                                                                        |
| Drug discontinuation rate and adverse reactions leading to drug discontinuation.                                                                                                                                                                         |
| Therapy-induced requirement for additional treatment (e.g. pacemaker implantation).                                                                                                                                                                      |
| Population-specific standard deviations and proportions to enable sample size calculation for a future trial.                                                                                                                                            |
| Assessment of unplanned hospital admissions and cardiovascular outcomes.                                                                                                                                                                                 |
| <b>Exploratory objectives:</b>                                                                                                                                                                                                                           |
| Assessment of the validity and reproducibility of echocardiographic measures in patients with AF.                                                                                                                                                        |
| Correlation of baseline measures, including quality of life questionnaires and unblinded baseline investigations such as quality of life, BNP, LVEF, E/e', EHRA class, intracellular biomarkers and heart rate.                                          |
| Impact of therapy on intracellular sodium and calcium concentration and cardiotoxic steroid levels as biomarkers of cellular response.                                                                                                                   |
| Impact of combination therapy on outcomes.                                                                                                                                                                                                               |
| Change in cognitive function at twelve months.                                                                                                                                                                                                           |
| Qualitative research of patient-reported quality of life using focus groups to explore patient acceptability, optimal delivery methods and responsiveness.                                                                                               |
| Correlation of serum digoxin concentration with change in quality of life and intracellular methods.                                                                                                                                                     |
| Cost-consequence economic analysis from an NHS healthcare perspective.                                                                                                                                                                                   |

AF, Atrial Fibrillation; AFEQT, Atrial Fibrillation Effect on QualiTY-of-life questionnaire; BNP, B-type natriuretic peptide; ECG, electrocardiogram; EHRA, European Heart Rhythm Association functional class; EQ-5D-5L, EuroQol five dimensions five level questionnaire; LVEF, left ventricular ejection fraction; NHS, National Health Service; SF-36, Short Form (36) Health Survey.

Table 3: Patient-reported quality of life questionnaires used in RATE-AF

| Questionnaire                                                                               | Details                                                                                                                                                                                                                                                                                                                                                                                                                                                                                                                       | Advantages and disadvantages                                                                                                                                                                                                                                                                                                               |
|---------------------------------------------------------------------------------------------|-------------------------------------------------------------------------------------------------------------------------------------------------------------------------------------------------------------------------------------------------------------------------------------------------------------------------------------------------------------------------------------------------------------------------------------------------------------------------------------------------------------------------------|--------------------------------------------------------------------------------------------------------------------------------------------------------------------------------------------------------------------------------------------------------------------------------------------------------------------------------------------|
| SF-36<br>Short Form (36)<br>Health Survey <sup>76</sup>                                     | <p>Generic instrument with 4-week recall period in eight domains (vitality, physical functioning, bodily pain, general health perceptions, physical role functioning, emotional role functioning, social role functioning and mental health).</p> <p>11 subdivided questions, each recorded with a Likert scale.</p> <p>Scoring: Each response is given a numerical value (0 to 100, with 100 representing the best level of functioning possible), which are averaged across each domain.</p>                                | <p>Extensively validated across a wide variety of conditions and the elderly.<sup>77</sup></p> <p>Not specific to AF and hence other comorbidities may dominate responses.</p> <p>Requires a license fee.</p>                                                                                                                              |
| EQ-5D-5L<br>EuroQol five<br>dimensions five<br>level<br>questionnaire <sup>78 79</sup>      | <p>Generic instrument about today's health with a five-answer scale in five domains (mobility, self-care, usual activities, pain/discomfort and anxiety/depression).</p> <p>Scoring: Each question is scored (1 to 5, with 1 representing the best health). The overall profile can be indexed to country specific value sets giving a continuous value.</p> <p>Also includes a visual analogue scale denoting current health perception (0 to 100 scale, with 100 representing the best health the patient can imagine).</p> | <p>Simple questionnaire that is quick to complete and includes a visual scale.</p> <p>Extensive utilisation, particularly for health economic assessment, with improvement discrimination over prior versions.<sup>80</sup></p> <p>Not specific to AF and hence other comorbidities may dominate responses.</p>                            |
| AFEQT<br>Atrial Fibrillation<br>Effect on<br>Quality-of-life<br>questionnaire <sup>81</sup> | <p>AF-specific quality of life instrument with 4-week recall period in domains relating to symptoms, daily activities and treatment.</p> <p>20 questions (18 on health-related quality and life and 2 on treatment satisfaction), each recorded with a 7-point Likert scale.</p> <p>Scoring: Responses to the 18 questions are summed and converted to a continuous score (0 to 100, with 100 corresponding to no patient concerns nor disability due to AF). Component domains are scored in a similar way.</p>              | <p>Specific to the impact of AF on quality of life.</p> <p>Better than other AF-specific tools in a systematic review of methodological/psychometric assessment.<sup>68</sup></p> <p>Limited validation as yet in comparison to generic tools<sup>82 83</sup>, particularly for clinical responsiveness.</p> <p>License fee may apply.</p> |



## Figure legends

### Figure 1: Evidenced-based summary for management of AF

Summary of evidence for main components of clinical management, highlighting paucity of robust data for key issues regarding rate control therapy. RCT, randomised controlled trial; LV, left-ventricular; NOAC, novel oral anticoagulants.

### Figure 2: Hospitalisation in rate versus rhythm control trials

Meta-analysis of hospitalisation in the six largest rate versus rhythm control trials, excluding hospital visits for cardioversion procedures, where applicable. Studies are pooled with a random-effects model. Significant heterogeneity was identified, with an  $I^2$  value of 66.8% ( $p=0.01$ ). Grey boxes represent the comparative weight of the study.

STAF, Strategies of Treatment of Atrial Fibrillation study (cardioversion/AAD versus rate control in persistent AF)<sup>84</sup>; PIAF, Pharmacological Intervention in Atrial Fibrillation trial (amiodarone/cardioversion versus diltiazem in persistent AF)<sup>85</sup>; HOT CAFE, How to Treat Chronic Atrial Fibrillation study (cardioversion/AAD versus rate control in persistent AF)<sup>86</sup>; AF-CHF, Atrial Fibrillation and Congestive Heart Failure trial (cardioversion/AAD versus rate control in paroxysmal/persistent AF with LVEF  $\leq 35\%$ )<sup>27</sup>; CRAAFT, Control of Rate versus Rhythm in rheumatic Atrial Fibrillation Trial (cardioversion/amiodarone versus diltiazem in persistent AF due to rheumatic heart disease)<sup>87</sup>; AFFIRM, Atrial Fibrillation Follow-up Investigation of Rhythm Management study (AAD/cardioversion versus rate control in paroxysmal/persistent AF).<sup>22</sup>

### Figure 3: RATE-AF trial schema

Trial flowchart, including major endpoints and inclusion/exclusion criteria.

1  
2  
3  
4 **Appendix: RATE-AF trial protocol**  
5  
6  
7  
8  
9

10 Please see attached file.  
11  
12  
13  
14  
15  
16  
17  
18  
19  
20  
21  
22  
23  
24  
25  
26  
27  
28  
29  
30  
31  
32  
33  
34  
35  
36  
37  
38  
39  
40  
41  
42  
43  
44  
45  
46  
47  
48  
49  
50  
51  
52  
53  
54  
55  
56  
57  
58  
59  
60

For peer review only

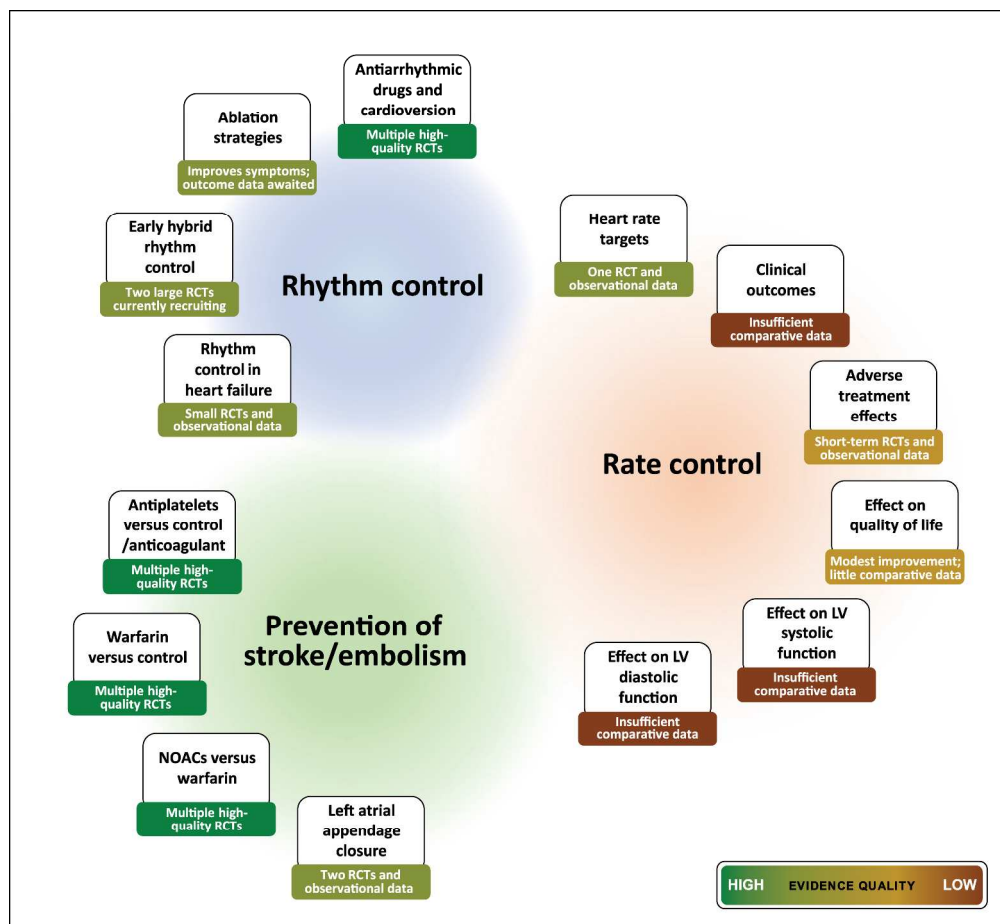

Figure 1: Evidence-based summary for management of AF  
 Summary of evidence for main components of clinical management, highlighting paucity of robust data for key issues regarding rate control therapy. RCT, randomised controlled trial; LV, left-ventricular; NOAC, novel oral anticoagulants.

291x267mm (300 x 300 DPI)

Hospitalisation: Rate versus rhythm-control

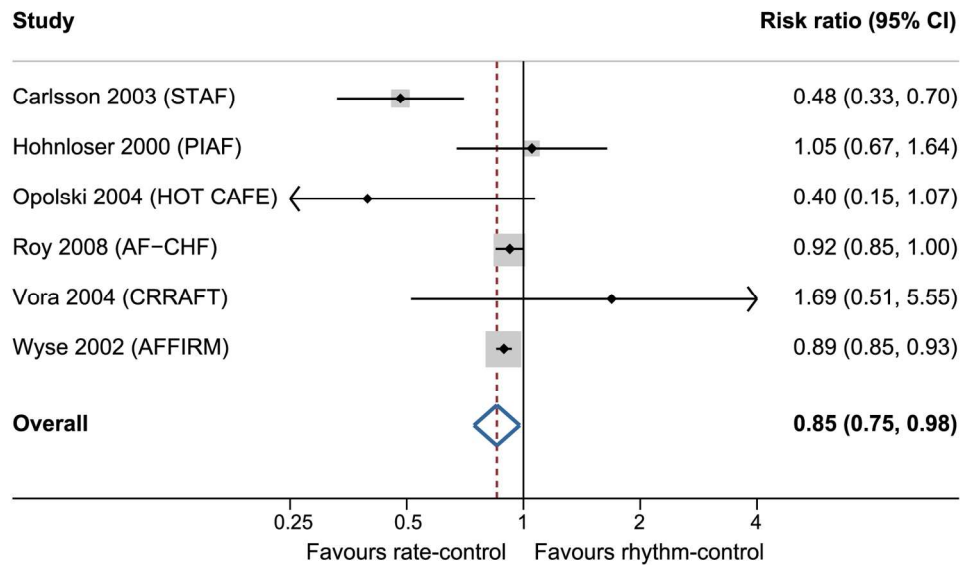

Figure 2: Hospitalisation in rate versus rhythm control trials  
 Meta-analysis of hospitalisation in the six largest rate versus rhythm control trials, excluding hospital visits for cardioversion procedures, where applicable. Studies are pooled with a random-effects model. Significant heterogeneity was identified, with an I2 value of 66.8% (p=0.01). Grey boxes represent the comparative weight of the study.  
 STAF, Strategies of Treatment of Atrial Fibrillation study (cardioversion/AAD versus rate control in persistent AF)<sup>81</sup>; PIAF, Pharmacological Intervention in Atrial Fibrillation trial (amiodarone/cardioversion versus diltiazem in persistent AF)<sup>82</sup>; HOT CAFE, How to Treat Chronic Atrial Fibrillation study (cardioversion/AAD versus rate control in persistent AF)<sup>83</sup>; AF-CHF, Atrial Fibrillation and Congestive Heart Failure trial (cardioversion/AAD versus rate control in paroxysmal/persistent AF with LVEF ≤35%)<sup>27</sup>; CRAAFT, Control of Rate versus Rhythm in rheumatic Atrial Fibrillation Trial (cardioversion/amiodarone versus diltiazem in persistent AF due to rheumatic heart disease)<sup>84</sup>; AFFIRM, Atrial Fibrillation Follow-up Investigation of Rhythm Management study (AAD/cardioversion versus rate control in paroxysmal/persistent AF).<sup>22</sup>

157x106mm (300 x 300 DPI)





28 Figure 3: RATE-AF trial schema  
29 Trial flowchart, including major endpoints and inclusion/exclusion criteria.

30 183x114mm (300 x 300 DPI)

1  
2  
3  
4  
5  
6  
7  
8  
9  
10  
11  
12  
13  
14  
15  
16  
17  
18  
19  
20  
21  
22  
23  
24  
25  
26  
27  
28  
29  
30  
31  
32  
33  
34  
35  
36  
37  
38  
39  
40  
41  
42  
43  
44  
45  
46  
47  
48  
49  
50  
51  
52  
53  
54  
55  
56  
57  
58  
59  
60

# Evaluating different rate control therapies in permanent atrial fibrillation: A prospective, randomised, open-label, blinded endpoint trial comparing digoxin and beta-blockers as initial rate control therapy

## Rate control Therapy Evaluation in Atrial Fibrillation:

### RATE-AF



### RATE-AF TRIAL PROTOCOL

Version 1.0, 23<sup>rd</sup> March 2016

|                            |                                                                                |
|----------------------------|--------------------------------------------------------------------------------|
| <b>Sponsor:</b>            | University of Birmingham                                                       |
| <b>Chief Investigator:</b> | Dr Dipak Kotecha                                                               |
| <b>Coordinating Unit:</b>  | Birmingham Clinical Trials Unit                                                |
| <b>Funder:</b>             | National Institute for Health Research (NIHR)<br>Career Development Fellowship |
| <b>ISRCTN:</b>             | TBC                                                                            |
| <b>EudraCT No.:</b>        | 2015-005043-13                                                                 |
| <b>REC Ref. No.:</b>       | TBC                                                                            |

UNIVERSITY OF  
BIRMINGHAM



**NHS**  
National Institute for  
Health Research

## TRIAL COMMITTEES AND CONTACT DETAILS

### Trial Management Group

|                              |                                                                                                                                                                                                                                                                                                                             |
|------------------------------|-----------------------------------------------------------------------------------------------------------------------------------------------------------------------------------------------------------------------------------------------------------------------------------------------------------------------------|
| <b>Chief Investigator</b>    | <b>NIHR Career Development Fellow &amp; Clinician Scientist</b>                                                                                                                                                                                                                                                             |
| <b>Dr Dipak Kotecha</b>      | Institute of Cardiovascular Sciences, University of Birmingham, The Medical School, Vincent Drive, Birmingham, B15 2TT, UK<br>Email: <a href="mailto:d.kotecha@bham.ac.uk">d.kotecha@bham.ac.uk</a><br>Telephone: 07974 115676                                                                                              |
| <b>Prof Paulus Kirchhof</b>  | <b>Professor of Cardiovascular Medicine</b><br>Institute of Cardiovascular Sciences, University of Birmingham, Institute of Biomedical Research, Vincent Drive, Birmingham B15 2TT, UK<br>Email: <a href="mailto:p.kirchhof@bham.ac.uk">p.kirchhof@bham.ac.uk</a><br>Telephone: 0121 414 7042                               |
| <b>Dr Michael Griffith</b>   | <b>Consultant Electrophysiologist</b><br>University Hospitals Birmingham NHS Trust, Nuffield House, Queen Elizabeth Hospital, Birmingham, B15 2TH, UK<br>Email: <a href="mailto:michael.griffith@uhb.nhs.uk">michael.griffith@uhb.nhs.uk</a><br>Telephone: 0121 371 4038                                                    |
| <b>Prof Gregory Y H Lip</b>  | <b>Professor of Cardiovascular Medicine &amp; Director, Haemostasis Thrombosis &amp; Vascular Biology Unit</b><br>Institute of Cardiovascular Sciences, University of Birmingham, City Hospital, Birmingham, B18 7QH, UK<br>Email <a href="mailto:g.y.h.lip@bham.ac.uk">g.y.h.lip@bham.ac.uk</a><br>Telephone: 0121 5075080 |
| <b>Prof Jonathan Townend</b> | <b>Professor of Cardiology</b><br>University Hospitals Birmingham NHS Trust, Nuffield House, Queen Elizabeth Hospital, Birmingham, B15 2TH, UK<br>Email: <a href="mailto:john.townend@uhb.nhs.uk">john.townend@uhb.nhs.uk</a><br>Telephone: 0121 371 4623                                                                   |
| <b>Dr Rick Steeds</b>        | <b>Consultant Cardiologist and Head of Cardiac Imaging</b><br>University Hospitals Birmingham NHS Trust, Nuffield House, Queen Elizabeth Hospital, Birmingham, B15 2TH, UK<br>Email: <a href="mailto:rick.steeds@uhb.nhs.uk">rick.steeds@uhb.nhs.uk</a><br>Telephone: 0121 371 6130                                         |
| <b>Prof Melanie Calvert</b>  | <b>Professor of Outcomes Methodology</b><br>Institute of Applied Health Research, University of Birmingham, Birmingham, B15 2TT, UK<br>Email: <a href="mailto:m.calvert@bham.ac.uk">m.calvert@bham.ac.uk</a><br>Telephone: 0121 414 8595                                                                                    |
| <b>Dr Susan Jowett</b>       | <b>Senior Lecturer, Health Economics</b><br>Institute of Applied Health Research, University of Birmingham, Birmingham, B15 2TT, UK<br>Email <a href="mailto:s.jowett@bham.ac.uk">s.jowett@bham.ac.uk</a><br>Telephone: 0121 414 7898                                                                                       |
| <b>Dr Jonathan Mathers</b>   | <b>Senior Lecturer, Qualitative and Mixed Methods Applied Health Research</b><br>Institute of Applied Health Research, University of Birmingham, Birmingham, B15 2TT, UK<br>Email <a href="mailto:j.m.mathers@bham.ac.uk">j.m.mathers@bham.ac.uk</a><br>Telephone: 0121 414 6024                                            |

### Birmingham Clinical Trials Unit

|                          |                                                                                                                                                                                                                                                |
|--------------------------|------------------------------------------------------------------------------------------------------------------------------------------------------------------------------------------------------------------------------------------------|
| <b>Prof Jon Deeks</b>    | <b>Professor of Biostatistics and Director, BCTU</b><br><br>Birmingham Clinical Trials Unit, University of Birmingham, Birmingham, B15 2TT, UK<br>Email <a href="mailto:j.deeks@bham.ac.uk">j.deeks@bham.ac.uk</a><br>Telephone: 0121 414 5328 |
| <b>Dr Margaret Grant</b> | <b>Operations Manager</b><br><br>Birmingham Clinical Trials Unit, University of Birmingham, Birmingham, B15 2TT, UK<br>Email <a href="mailto:m.r.grant@bham.ac.uk">m.r.grant@bham.ac.uk</a><br>Telephone: 0121 415 9106                        |
| <b>Gemma Slinn</b>       | <b>Senior Trial Coordinator</b><br><br>Birmingham Clinical Trials Unit, University of Birmingham, Birmingham, B15 2TT, UK<br>Email <a href="mailto:g.slinn@bham.ac.uk">g.slinn@bham.ac.uk</a><br>Telephone: 0121 415 8445                      |
| <b>Samir Mehta</b>       | <b>Statistician</b><br><br>Birmingham Clinical Trials Unit, University of Birmingham, Birmingham, B15 2TT, UK<br>Email <a href="mailto:s.mehta.1@bham.ac.uk">s.mehta.1@bham.ac.uk</a><br>Telephone: 0121 415 9117                              |

### Trial Oversight Committee

#### Co-Chairs

|                        |                                                                                                                                                                                                                                                                                                                                                                                         |
|------------------------|-----------------------------------------------------------------------------------------------------------------------------------------------------------------------------------------------------------------------------------------------------------------------------------------------------------------------------------------------------------------------------------------|
| <b>Dr Kazem Rahimi</b> | <b>Associate Professor of Cardiovascular Medicine, University of Oxford<br/>Deputy Director, The George Institute for Global Health</b><br><br>The George Institute for Global Health, University of Oxford, 34 Broad Street, Oxford OX1 3BD, UK<br>Email: <a href="mailto:kazem.rahimi@georgeinstitute.ox.ac.uk">kazem.rahimi@georgeinstitute.ox.ac.uk</a><br>Telephone: 01865 617 201 |
| <b>Prof. John Camm</b> | <b>BHF Professor of Clinical Cardiology</b><br><br>St George's University of London, Cranmer Terrace, London SW17 0RE, UK<br>Email: <a href="mailto:jcam@sgul.ac.uk">jcam@sgul.ac.uk</a><br>Telephone: 0208 725 3414                                                                                                                                                                    |

#### Patient Representative

|                      |                                                                                                  |
|----------------------|--------------------------------------------------------------------------------------------------|
| <b>Mary Stanbury</b> | Lead PPI Representative<br>Email: <a href="mailto:dms27@btinternet.com">dms27@btinternet.com</a> |
|----------------------|--------------------------------------------------------------------------------------------------|

#### On behalf of the Trial Management Group

|                              |                                                 |
|------------------------------|-------------------------------------------------|
| <b>Dr Dipak Kotecha</b>      |                                                 |
| <b>Prof. Jon Deeks</b>       | For contact details, see Trial Management Group |
| <b>Prof. Paulus Kirchhof</b> |                                                 |



## RATE-AF Trial Office

For general protocol related queries and supply of trial materials:

Birmingham Clinical Trials Unit (BCTU), Institute of Applied Health Research, College of Medical & Dental Sciences, Public Health Building, University of Birmingham, Edgbaston, Birmingham B15 2TT

Telephone: 0121 415 8445  
 Fax: 0121 415 9135  
 Email: RATE-AF@trials.bham.ac.uk  
 Website: www.birmingham.ac.uk/RATE-AF

## Randomisation

Telephone: 0800 953 0274

Website: <https://www.birmingham.ac.uk/RATEAF>

## Safety Reporting

Fax SAE Forms to: 0121 415 9135 or 0121 415 9136



## Protocol Development and Sign Off

### Protocol Amendments

The following amendments and/ or administrative changes have been made to this protocol since the implementation of the first approved version

| Amendment number | Date of amendment | Protocol version number | Type of amendment | Summary of amendment |
|------------------|-------------------|-------------------------|-------------------|----------------------|
|                  |                   |                         |                   |                      |

**Chief Investigator Signature Page**

Trial Name: **RATE-AF**

Protocol Version Number: Version: \_\_ \_\_

Protocol Version Date: \_\_ \_\_ / \_\_ \_\_ \_\_ / \_\_ \_\_ \_\_ \_\_

**This protocol has been approved by:**

CI Name: Dr Dipak Kotecha

Trial Role: Chief Investigator

Signature and date: \_\_\_\_\_ \_\_ \_\_ / \_\_ \_\_ \_\_ / \_\_ \_\_ \_\_ \_\_

**Sponsor Statement**

Where the University of Birmingham takes on the sponsor role for protocol development oversight, the signing of the IRAS form by the Sponsor will serve as confirmation of the approval of this protocol.

1  
2  
3  
4  
5  
6  
7  
8  
9  
10  
11  
12  
13  
14  
15  
16  
17  
18  
19  
20  
21  
22  
23  
24  
25  
26  
27  
28  
29  
30  
31  
32  
33  
34  
35  
36  
37  
38  
39  
40  
41  
42  
43  
44  
45  
46  
47  
48  
49  
50  
51  
52  
53  
54  
55  
56  
57  
58  
59  
60

## Principal Investigator Signature Page

### Principal Investigator:

I have read and agree to the protocol, as detailed in this document. I agree to adhere to the protocol as outlined and agree that any suggested changes to the protocol must be approved by the Trial Oversight Committee prior to seeking approval from the Research Ethics Committee and Regulatory Authority.

I am aware of my responsibilities as an Investigator under the guidelines of Good Clinical Practice (GCP), the Declaration of Helsinki, local regulations (as applicable) and the trial protocol and I agree to conduct the trial according to these guidelines and to appropriately direct and assist the staff under my control, who will be involved in the trial.

Trial Name: **RATE-AF**

Protocol Version Number:      Version: \_\_\_\_\_

Protocol Version Date:    \_\_\_ / \_\_\_ / \_\_\_

PI Name:                      <Enter>

Trial Role:                  Principal Investigator

Signature and date:                      \_\_\_\_\_ / \_\_\_ / \_\_\_

**The Principal Investigator should sign this page and return a copy to the RATE-AF Trial Office**

# Table of Contents

|          |                                                           |           |
|----------|-----------------------------------------------------------|-----------|
| <b>1</b> | <b>Trial Summary</b> .....                                | <b>13</b> |
| 1.1      | Trial Schema .....                                        | 15        |
| <b>2</b> | <b>Introduction</b> .....                                 | <b>16</b> |
| 2.1      | Background .....                                          | 16        |
| 2.2      | Epidemiology and Consequences of AF .....                 | 16        |
| 2.3      | Rhythm-Control in AF .....                                | 17        |
| 2.4      | Lack of Evidence to Guide Rate-Control Therapy .....      | 17        |
| 2.5      | Patient Wellbeing .....                                   | 19        |
| 2.6      | Rationale for the RATE-AF Trial .....                     | 19        |
| <b>3</b> | <b>Trial Design and Objectives</b> .....                  | <b>20</b> |
| 3.1      | Hypothesis .....                                          | 20        |
| 3.2      | Primary objective .....                                   | 21        |
| 3.3      | Secondary objectives .....                                | 21        |
| 3.4      | Feasibility objectives .....                              | 21        |
| 3.5      | Exploratory objectives .....                              | 21        |
| <b>4</b> | <b>Selection of Participants</b> .....                    | <b>22</b> |
| 4.1      | Inclusion Criteria .....                                  | 22        |
| 4.2      | Exclusion Criteria .....                                  | 22        |
| <b>5</b> | <b>Informed Consent Process</b> .....                     | <b>23</b> |
| <b>6</b> | <b>Enrolment and Randomisation</b> .....                  | <b>24</b> |
| 6.1      | Randomisation Procedures .....                            | 25        |
| <b>7</b> | <b>Trial Treatment</b> .....                              | <b>26</b> |
| 7.1      | Treatment .....                                           | 26        |
| 7.2      | Treatment Supply and Storage .....                        | 26        |
| 7.3      | Dosing Schedule .....                                     | 27        |
| 7.4      | Drug Interactions and Contraindications .....             | 27        |
| 7.5      | Accountability Procedures and Labelling .....             | 29        |
| 7.6      | Treatment Modification .....                              | 29        |
| 7.7      | Assessment of Compliance .....                            | 30        |
| <b>8</b> | <b>Trial Procedures and Schedule of Assessments</b> ..... | <b>30</b> |
| 8.1      | Baseline Visit .....                                      | 30        |

1  
2  
3  
4  
5  
6  
7  
8  
9  
10  
11  
12  
13  
14  
15  
16  
17  
18  
19  
20  
21  
22  
23  
24  
25  
26  
27  
28  
29  
30  
31  
32  
33  
34  
35  
36  
37  
38  
39  
40  
41  
42  
43  
44  
45  
46  
47  
48  
49  
50  
51  
52  
53  
54  
55  
56  
57  
58  
59  
60

|                                                                 |           |
|-----------------------------------------------------------------|-----------|
| 8.2 Up-Titration Visits .....                                   | 31        |
| 8.3 Visit 2, Month 6.....                                       | 31        |
| 8.4 Visit 3, Month 12 (Final Trial Assessment).....             | 32        |
| 8.5 Investigator-blinded Endpoints .....                        | 32        |
| 8.6 Long Term Follow-Up .....                                   | 32        |
| 8.7 Withdrawal .....                                            | 33        |
| 8.8 Trial Duration.....                                         | 33        |
| <b>9 Trial Procedures.....</b>                                  | <b>35</b> |
| 9.1 Procedures Defined as Standard Clinical Care.....           | 35        |
| 9.2 Medical History .....                                       | 35        |
| 9.3 Medication History .....                                    | 35        |
| 9.4 Physical Examination .....                                  | 36        |
| 9.5 Patient Reported Outcomes .....                             | 36        |
| 9.5.1 Choice of Outcomes and Qualitative Research.....          | 36        |
| 9.5.2 Data Collection for PROMs.....                            | 37        |
| 9.5.3 Outcome Appraisal .....                                   | 38        |
| 9.6 Transthoracic Echocardiography .....                        | 38        |
| 9.6.1 Reproducibility and Validity of Measurements .....        | 38        |
| 9.6.2 Systolic LV Function.....                                 | 38        |
| 9.6.3 Diastolic LV Function.....                                | 39        |
| 9.6.4 Left Atrial Size and Function.....                        | 40        |
| 9.6.5 Additional Echocardiography Parameters.....               | 40        |
| 9.7 Laboratory Evaluations.....                                 | 40        |
| 9.7.1 Laboratory Assays.....                                    | 41        |
| 9.7.2 Cellular Response to Rate Control .....                   | 41        |
| 9.7.3 Stored Blood Samples.....                                 | 41        |
| 9.7.4 Specimen Preparation, Handling, Storage and Shipment..... | 41        |
| 9.8 Economic Evaluation .....                                   | 41        |
| <b>10 Pharmacovigilance .....</b>                               | <b>43</b> |
| 10.1 Recording and Assessment of Adverse Events .....           | 43        |
| 10.2 Non-Serious Adverse Events/ Adverse Reactions .....        | 45        |
| 10.3 Serious Adverse Events .....                               | 45        |

|    |           |                                                        |
|----|-----------|--------------------------------------------------------|
| 1  |           |                                                        |
| 2  |           |                                                        |
| 3  | 10.3.1    | Expected SAEs NOT to be Reported on a SAE Form..... 45 |
| 4  | 10.4      | SUSARs ..... 45                                        |
| 5  | 10.5      | Development Safety Update Reports..... 46              |
| 6  | 10.6      | Annual Progress Reports..... 46                        |
| 7  | 10.7      | Pregnancy ..... 46                                     |
| 8  | 10.8      | Reporting Urgent Safety Measures..... 46               |
| 9  |           |                                                        |
| 10 | <b>11</b> | <b>Quality Control and Quality Assurance..... 47</b>   |
| 11 | 11.1      | Site Set-Up and Initiation ..... 47                    |
| 12 | 11.2      | Central Monitoring ..... 47                            |
| 13 | 11.3      | Audit and Inspection ..... 47                          |
| 14 | 11.4      | Notification of Serious Breaches..... 48               |
| 15 | 11.5      | Data Handling and Analysis..... 48                     |
| 16 | 11.6      | End of Trial..... 49                                   |
| 17 | 11.7      | Archiving ..... 49                                     |
| 18 |           |                                                        |
| 19 | <b>12</b> | <b>Statistical Considerations ..... 50</b>             |
| 20 | 12.1      | Outcome measures ..... 50                              |
| 21 | 12.1.1    | Primary Outcome ..... 50                               |
| 22 | 12.1.2    | Secondary Outcomes ..... 50                            |
| 23 | 12.1.3    | Feasibility Outcomes ..... 50                          |
| 24 | 12.2      | Power Calculations..... 51                             |
| 25 | 12.3      | Statistical analysis ..... 51                          |
| 26 | 12.3.1    | Primary outcome analysis..... 52                       |
| 27 | 12.3.2    | Feasibility and Secondary outcomes analysis..... 52    |
| 28 | 12.3.3    | Missing data and sensitivity analyses ..... 52         |
| 29 | 12.3.4    | Interim analyses and Stopping rules..... 52            |
| 30 | 12.4      | Final analysis..... 53                                 |
| 31 |           |                                                        |
| 32 | <b>13</b> | <b>Ethics and Regulatory Requirements..... 53</b>      |
| 33 |           |                                                        |
| 34 | <b>14</b> | <b>Oversight Committees..... 53</b>                    |
| 35 | 14.1      | Trial Management Group..... 53                         |
| 36 | 14.2      | Trial Oversight Committee ..... 54                     |
| 37 | 14.3      | Protocol amendments..... 54                            |
| 38 |           |                                                        |
| 39 | <b>15</b> | <b>Finance ..... 54</b>                                |
| 40 |           |                                                        |
| 41 |           |                                                        |
| 42 |           |                                                        |
| 43 |           |                                                        |
| 44 |           |                                                        |
| 45 |           |                                                        |
| 46 |           |                                                        |
| 47 |           |                                                        |
| 48 |           |                                                        |
| 49 |           |                                                        |
| 50 |           |                                                        |
| 51 |           |                                                        |
| 52 |           |                                                        |
| 53 |           |                                                        |
| 54 |           |                                                        |
| 55 |           |                                                        |
| 56 |           |                                                        |
| 57 |           |                                                        |
| 58 |           |                                                        |
| 59 |           |                                                        |
| 60 |           |                                                        |

1  
2  
3  
4  
5  
6  
7  
8  
9  
10  
11  
12  
13  
14  
15  
16  
17  
18  
19  
20  
21  
22  
23  
24  
25  
26  
27  
28  
29  
30  
31  
32  
33  
34  
35  
36  
37  
38  
39  
40  
41  
42  
43  
44  
45  
46  
47  
48  
49  
50  
51  
52  
53  
54  
55  
56  
57  
58  
59  
60

**16 Confidentiality and Data Protection..... 54**

**17 Insurance and Indemnity ..... 55**

**18 Dissemination and Publication ..... 55**

**19 Statement of Compliance ..... 56**

**20 References ..... 57**

**Appendix A: Randomised treatment arm - Digoxin**

**Appendix B: Randomised treatment arm - Bisoprolol**

For peer review only

## List of Abbreviations

|                    |                                                                   |
|--------------------|-------------------------------------------------------------------|
| <b>ABPI</b>        | Association of the British Pharmaceutical Industry                |
| <b>AE</b>          | Adverse Event                                                     |
| <b>AF</b>          | Atrial Fibrillation                                               |
| <b>BCTU</b>        | Birmingham Clinical Trials Unit                                   |
| <b>BNP</b>         | B-type Natriuretic Peptide                                        |
| <b>BPM</b>         | Beats per Minute                                                  |
| <b>CCB</b>         | Calcium Channel Blocker                                           |
| <b>CI</b>          | Chief Investigator                                                |
| <b>CMR</b>         | Cardiac Magnetic Resonance                                        |
| <b>CRF</b>         | Case Report Form                                                  |
| <b>CTA</b>         | Clinical Trial Authorisation                                      |
| <b>CTIMP</b>       | Clinical Trial of Medicinal Product                               |
| <b>DIBD</b>        | Developmental International Birth Date                            |
| <b>DMC</b>         | Data Monitoring Committee                                         |
| <b>DSUR</b>        | Developmental Safety Update Report                                |
| <b>DT</b>          | Deceleration Time                                                 |
| <b>ECG</b>         | Electrocardiogram                                                 |
| <b>EHRA</b>        | European Heart Rhythm Association                                 |
| <b>EU</b>          | European Union                                                    |
| <b>EudraCT No.</b> | European Union Drug Regulating Authorities Clinical Trials Number |
| <b>GCP</b>         | Good Clinical Practice                                            |
| <b>GFR</b>         | Glomerular Filtration Rate                                        |
| <b>GP</b>          | General Practitioner                                              |
| <b>HF</b>          | Heart Failure                                                     |
| <b>HR</b>          | Hazard Ratio                                                      |
| <b>IMP</b>         | Investigational Medicinal Product                                 |
| <b>INR</b>         | International Normalised Ratio                                    |
| <b>ISRCTN</b>      | International Standard Randomised Controlled Trial Number         |
| <b>IVRT</b>        | Isovolumic Relaxation Time                                        |
| <b>LA</b>          | Left-Atrial                                                       |
| <b>LV</b>          | Left-Ventricular                                                  |
| <b>LVEDD</b>       | Left-Ventricle End-Diastolic Dimension                            |
| <b>LVEDV</b>       | Left-Ventricle End-Diastolic Volume                               |
| <b>LVEF</b>        | Left-Ventricular Ejection Fraction                                |



## RATE-AF Trial Protocol

|    |                |                                                                                        |
|----|----------------|----------------------------------------------------------------------------------------|
| 1  |                |                                                                                        |
| 2  |                |                                                                                        |
| 3  | <b>LVESD</b>   | Left-Ventricle End-Systolic Dimension                                                  |
| 4  | <b>LVESV</b>   | Left-Ventricle End-Systolic Volume                                                     |
| 5  |                |                                                                                        |
| 6  | <b>LVSD</b>    | Left-Ventricular Systolic Dysfunction                                                  |
| 7  |                |                                                                                        |
| 8  | <b>MHRA</b>    | Medicines and Healthcare Products Regulatory Agency                                    |
| 9  | <b>MREC</b>    | Main Research Ethics Committee                                                         |
| 10 |                |                                                                                        |
| 11 | <b>NHS</b>     | National Health Service                                                                |
| 12 |                |                                                                                        |
| 13 | <b>NICE</b>    | National Institute of Clinical Excellence                                              |
| 14 | <b>NOAC</b>    | Novel Oral Anticoagulants                                                              |
| 15 |                |                                                                                        |
| 16 | <b>NYHA</b>    | New York Health Association                                                            |
| 17 | <b>PEF</b>     | Preserved Ejection Fraction                                                            |
| 18 |                |                                                                                        |
| 19 | <b>PI</b>      | Principal Investigator                                                                 |
| 20 |                |                                                                                        |
| 21 | <b>PIC</b>     | Patient Identification Centre                                                          |
| 22 | <b>PIL</b>     | Participant Information Leaflet                                                        |
| 23 |                |                                                                                        |
| 24 | <b>PROBE</b>   | Prospective Randomised Open Blinded End-point                                          |
| 25 | <b>QALY</b>    | Quality-Adjusted Life Year                                                             |
| 26 |                |                                                                                        |
| 27 | <b>QoL</b>     | Quality of Life                                                                        |
| 28 |                |                                                                                        |
| 29 | <b>R&amp;D</b> | Research and Development                                                               |
| 30 | <b>RCT</b>     | Randomised Controlled Trial                                                            |
| 31 |                |                                                                                        |
| 32 | <b>REC</b>     | Research Ethics Committee                                                              |
| 33 | <b>SAE</b>     | Serious Adverse Event                                                                  |
| 34 |                |                                                                                        |
| 35 | <b>SAR</b>     | Serious Adverse Reaction                                                               |
| 36 |                |                                                                                        |
| 37 | <b>SD</b>      | Standard Deviation                                                                     |
| 38 | <b>SmPC</b>    | Summary of Product Characteristics                                                     |
| 39 |                |                                                                                        |
| 40 | <b>SUSAR</b>   | Suspected Unexpected Serious Adverse Reaction                                          |
| 41 |                |                                                                                        |
| 42 | <b>TAPSE</b>   | Tricuspid Annular Plane Systolic Excursion                                             |
| 43 | <b>TDI</b>     | Tissue Doppler Imaging                                                                 |
| 44 |                |                                                                                        |
| 45 | <b>TMF</b>     | Trial Master File                                                                      |
| 46 |                |                                                                                        |
| 47 | <b>TMG</b>     | Trial Management Group                                                                 |
| 48 | <b>TSC</b>     | Trial Steering Committee                                                               |
| 49 |                |                                                                                        |
| 50 | <b>UHB</b>     | University Hospitals Birmingham                                                        |
| 51 |                |                                                                                        |
| 52 | <b>WTCRF</b>   | NIHR Wellcome Trust Clinical Research Facility at Queen Elizabeth Hospital, Birmingham |
| 53 |                |                                                                                        |
| 54 |                |                                                                                        |
| 55 |                |                                                                                        |
| 56 |                |                                                                                        |
| 57 |                |                                                                                        |
| 58 |                |                                                                                        |
| 59 |                |                                                                                        |
| 60 |                |                                                                                        |

# 1 Trial Summary

|                          |                                                                                                                                                                                                                                                                                                                                                                                                                                                                                                                                                                                                                                                                                                                                                                                                                                                                                                                                                                                                                                                                                                                                                                                                                                                                                                                                                                                                                                                                                                                                          |
|--------------------------|------------------------------------------------------------------------------------------------------------------------------------------------------------------------------------------------------------------------------------------------------------------------------------------------------------------------------------------------------------------------------------------------------------------------------------------------------------------------------------------------------------------------------------------------------------------------------------------------------------------------------------------------------------------------------------------------------------------------------------------------------------------------------------------------------------------------------------------------------------------------------------------------------------------------------------------------------------------------------------------------------------------------------------------------------------------------------------------------------------------------------------------------------------------------------------------------------------------------------------------------------------------------------------------------------------------------------------------------------------------------------------------------------------------------------------------------------------------------------------------------------------------------------------------|
| Title                    | <p>Evaluating different rate control therapies in permanent atrial fibrillation: A prospective, randomised, open-label, blinded endpoint trial comparing digoxin and beta-blockers as initial rate control therapy</p> <p><b><u>R</u>Ate control <u>T</u>herapy <u>E</u>valuation in <u>A</u>trial <u>F</u>ibrillation: RATE-AF</b></p>                                                                                                                                                                                                                                                                                                                                                                                                                                                                                                                                                                                                                                                                                                                                                                                                                                                                                                                                                                                                                                                                                                                                                                                                  |
| Acronym                  | RATE-AF                                                                                                                                                                                                                                                                                                                                                                                                                                                                                                                                                                                                                                                                                                                                                                                                                                                                                                                                                                                                                                                                                                                                                                                                                                                                                                                                                                                                                                                                                                                                  |
| Trial Design and Methods | <p>A prospective, randomised, open-label, blinded-endpoint (PROBE) trial design. The RATE-AF trial combines hypothesis testing (quality of life, cardiac function, exercise capacity and biomarkers), evaluation of measures (validity, reproducibility and correlation of outcomes) and a feasibility study for a future clinical event trial (assessing recruitment, retention and sample size).</p>                                                                                                                                                                                                                                                                                                                                                                                                                                                                                                                                                                                                                                                                                                                                                                                                                                                                                                                                                                                                                                                                                                                                   |
| Trial Medications        | <p>Digoxin 62.5 – 250 µg od<br/>Bisoprolol 1.25 – 15 mg od</p>                                                                                                                                                                                                                                                                                                                                                                                                                                                                                                                                                                                                                                                                                                                                                                                                                                                                                                                                                                                                                                                                                                                                                                                                                                                                                                                                                                                                                                                                           |
| Trial Outcomes           | <p><b><u>Primary Outcome:</u></b></p> <p>Patient-reported quality of life (QoL): SF-36 physical component summary score at six months</p> <p><b><u>Secondary Outcomes:</u></b></p> <p>Patient-reported QoL:</p> <ul style="list-style-type: none"> <li>• SF-36 global and domain-specific scores at 6 and 12 months</li> <li>• EQ-5D-5L summary index and visual analogue scale at six and twelve months</li> <li>• AFEQT overall score at six and twelve months</li> </ul> <p>Cardiac function:</p> <ul style="list-style-type: none"> <li>• Echocardiographic LVEF at 12 months</li> <li>• Diastolic function (E/e' and composite of diastolic indices) at 12 months</li> </ul> <p>Functional assessment:</p> <ul style="list-style-type: none"> <li>• Six-minute walking distance at 6 and 12 months</li> <li>• Change in European Heart Rhythm Association (EHRA) class at 6 and 12 months</li> </ul> <p>Biomarkers:</p> <ul style="list-style-type: none"> <li>• Change in B-type natriuretic peptide (BNP) levels at 6 months</li> </ul> <p>Change in heart rate using 24-hour ambulatory ECG</p> <p><b><u>Feasibility Outcomes:</u></b></p> <p>Recruitment target of 3 patients per week across all participating centres.</p> <p>Compliance and reasons for non-compliance</p> <p>Number of withdrawals and losses to follow-up (with reasons)</p> <p>Drug discontinuation rate and adverse reactions requiring drug discontinuation.</p> <p>Number of patients needing therapy-induced requirement for additional treatment</p> |

|                                           |                                                                                                                                                                                                                                                                                                                                                                                                                                                                                                                                                                                                                                                                                                                                                                                                                                                                                                                                                                                                                                                                                                                                                                                                                                                                                                                                                                                                                                                                                                                                                                                                                                                                                                                                                                                                            |
|-------------------------------------------|------------------------------------------------------------------------------------------------------------------------------------------------------------------------------------------------------------------------------------------------------------------------------------------------------------------------------------------------------------------------------------------------------------------------------------------------------------------------------------------------------------------------------------------------------------------------------------------------------------------------------------------------------------------------------------------------------------------------------------------------------------------------------------------------------------------------------------------------------------------------------------------------------------------------------------------------------------------------------------------------------------------------------------------------------------------------------------------------------------------------------------------------------------------------------------------------------------------------------------------------------------------------------------------------------------------------------------------------------------------------------------------------------------------------------------------------------------------------------------------------------------------------------------------------------------------------------------------------------------------------------------------------------------------------------------------------------------------------------------------------------------------------------------------------------------|
|                                           | Population-specific standard deviations (SD) and proportions: <ul style="list-style-type: none"> <li>SD of SF36 physical functioning score at 6 and 12 months</li> <li>SD of SF36 overall score at 6 and 12 months</li> <li>SD of AFEQT overall score at 6 and 12 months</li> <li>SD of LVEF and E/e' scores at 6 and 12 months</li> <li>Unplanned hospitalisation admissions rates</li> </ul>                                                                                                                                                                                                                                                                                                                                                                                                                                                                                                                                                                                                                                                                                                                                                                                                                                                                                                                                                                                                                                                                                                                                                                                                                                                                                                                                                                                                             |
|                                           | Cardiovascular Events (particularly mortality, thromboembolic events, myocardial infarction and cardiovascular interventions)                                                                                                                                                                                                                                                                                                                                                                                                                                                                                                                                                                                                                                                                                                                                                                                                                                                                                                                                                                                                                                                                                                                                                                                                                                                                                                                                                                                                                                                                                                                                                                                                                                                                              |
| <b>Trial Duration per Participant</b>     | 12 months of trial therapy                                                                                                                                                                                                                                                                                                                                                                                                                                                                                                                                                                                                                                                                                                                                                                                                                                                                                                                                                                                                                                                                                                                                                                                                                                                                                                                                                                                                                                                                                                                                                                                                                                                                                                                                                                                 |
| <b>Planned Trial Sites</b>                | Multiple screening sites with single site recruitment                                                                                                                                                                                                                                                                                                                                                                                                                                                                                                                                                                                                                                                                                                                                                                                                                                                                                                                                                                                                                                                                                                                                                                                                                                                                                                                                                                                                                                                                                                                                                                                                                                                                                                                                                      |
| <b>Total Number of Participants</b>       | 160                                                                                                                                                                                                                                                                                                                                                                                                                                                                                                                                                                                                                                                                                                                                                                                                                                                                                                                                                                                                                                                                                                                                                                                                                                                                                                                                                                                                                                                                                                                                                                                                                                                                                                                                                                                                        |
| <b>Main Inclusion/ Exclusion Criteria</b> | <p><b><u>Inclusion Criteria</u></b></p> <p>Adult patients, aged 60 years or older</p> <p>Permanent AF, characterised (at time of randomisation) as a physician decision for rate-control with no plans for cardioversion, anti-arrhythmic medication, or ablation therapy</p> <p>Symptoms of breathlessness (New York Heart Association Class II or more)</p> <p>Able to provide written, informed consent</p> <p><b><u>Exclusion Criteria</u></b></p> <p>Established indication for beta-blocker therapy, e.g. myocardial infarction in the last 6 months</p> <p>Known contraindications for therapy with beta-blockers or digoxin, e.g. a history of severe bronchospasm that would preclude use of beta-blockers, or known intolerance to these medications</p> <p>Baseline heart rate &lt;60 bpm</p> <p>History of second or third-degree heart block</p> <p>Supraventricular arrhythmias associated with accessory conducting pathways (e.g. Wolff-Parkinson-White syndrome) or a history of ventricular tachycardia or fibrillation</p> <p>Planned pacemaker implantation (including cardiac resynchronisation therapy), pacemaker-dependent rhythm or history of atrioventricular node ablation</p> <p>Decompensated heart failure (evidenced by need for intravenous inotropes, vasodilators or diuretics) within 14 days prior to randomisation</p> <p>A current diagnosis of obstructive hypertrophic cardiomyopathy, myocarditis or constrictive pericarditis</p> <p>Received or on waiting list for heart transplantation</p> <p>Receiving renal replacement therapy</p> <p>Major surgery, including thoracic or cardiac surgery, within 3 months of randomisation</p> <p>Severe, concomitant non-cardiovascular disease (including malignancy) that is expected to reduce life expectancy</p> |

# 1.1 Trial Schema

Figure 1

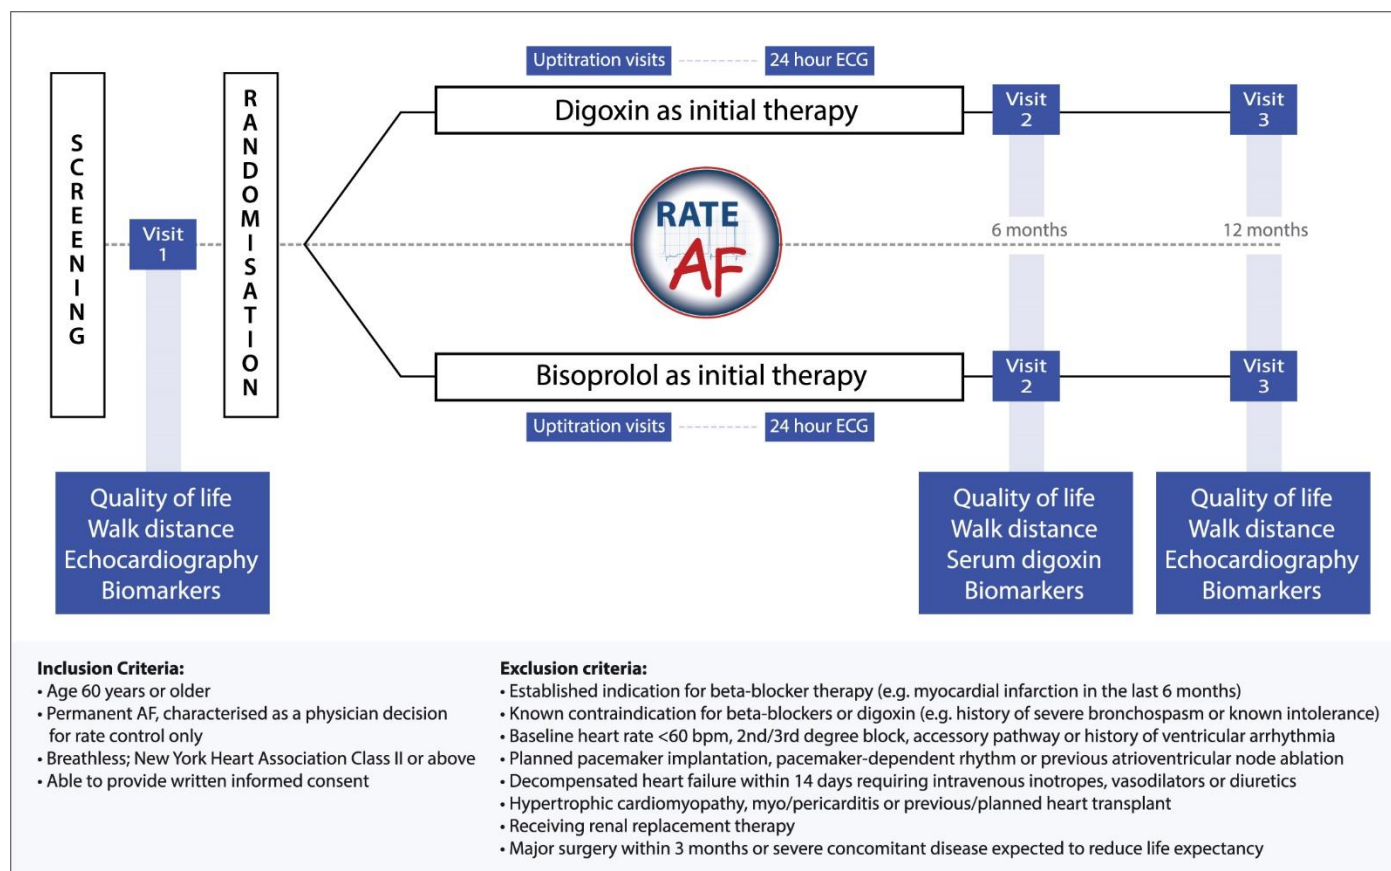

This protocol describes the **RATE-AF** trial only. The trial will be conducted in accordance with the protocol, Good Clinical Practice (GCP) and applicable regulatory requirements. Every care has been taken in the drafting of this protocol, but future amendments may be necessary, which will receive the required approvals prior to implementation.

## 2 Introduction

### 2.1 Background

Atrial fibrillation (AF) is an increasingly common cardiac condition that leads to a substantial burden on quality-of-life (QoL), an increased risk of cardiovascular events, hospitalisation and death, and significant healthcare costs for the NHS. In addition to anticoagulation and considerations for rhythm control therapy, most patients with AF are in need of pharmacological control of heart rate. This aspect of care has not received stringent investigation, with treatment guidelines based on small crossover studies and observational data rather than robust controlled trials.<sup>1-3</sup> Beta-blocker monotherapy remains the first-line option in the current NICE AF guidelines consultation document, with digoxin only for sedentary patients, although this recommendation is based on 'very low-quality evidence'.<sup>4</sup> The benefit of different rate-control therapies on symptoms and other intermediate outcomes (such as left-ventricular ejection fraction [LVEF] and diastolic function) are unknown, as are their effects on clinical events such as hospitalisation. This situation is unacceptable in light of the potential benefits and risk of different rate-control options in AF. It also limits our ability to personalise treatment according to patient characteristics.

The RAte control Therapy Evaluation in Atrial Fibrillation (**RATE-AF**) trial is informed by a number of in-depth systematic reviews of management and clinical outcomes in AF patients.<sup>5-11</sup> Taken together, this information provides a sound basis to plan a major randomised controlled trial (RCT).<sup>12, 13</sup> However as trials of rate-control in AF have typically been small or uncontrolled, further information is needed before designing a trial that can assess clinical outcomes. The **RATE-AF** trial will allow us to define appropriate primary and secondary outcome measures and their standard deviation in a contemporary population of patients with permanent AF. This information will allow us to estimate sample size, determination of recruitment, retention and adherence policies, and to ascertain the best methods of obtaining adverse event data and reliable economic costs for a larger trial assessing cardiovascular outcomes and hospitalisation. The **RATE-AF** trial will also be the largest RCT of its kind, allowing us to compare the effect of beta-blockers and digoxin on QoL as initial rate-control therapy in patients with permanent AF. The long-term aim of the research is to answer key questions about how to initiate therapy, stratified by relevant patient characteristics such as systolic and diastolic cardiac function, baseline symptoms and concurrent medication. The research will also define the pathophysiological mechanisms underlying AF-related symptoms, left-ventricular function and their association with adverse clinical outcomes, and to identify clinical markers for the response to different rate control therapy.

### 2.2 Epidemiology and Consequences of AF

AF is a common condition that is associated with increased rates of mortality and serious morbidity, including stroke, worsening of heart failure, sudden death, and reduced QoL.<sup>1</sup> The prevalence of AF increases with age, ranging from 0.7% in those aged 55–59 years to 17.8% in those aged above 85.<sup>14</sup> A doubling of both incidence and prevalence of AF is predicted in the next 20 years.<sup>15</sup>

1  
2  
3  
4  
5  
6  
7  
8  
9  
10  
11  
12  
13  
14  
15  
16  
17  
18  
19  
20  
21  
22  
23  
24  
25  
26  
27  
28  
29  
30  
31  
32  
33  
34  
35  
36  
37  
38  
39  
40  
41  
42  
43  
44  
45  
46  
47  
48  
49  
50  
51  
52  
53  
54  
55  
56  
57  
58  
59  
60

Patients with AF are twice as likely to be hospitalised as propensity score-matched controls, with direct medical costs estimated to be 73% higher.<sup>16</sup> Further, AF is an independent predictor of all-cause mortality, with a two-fold adjusted increase in death.<sup>17, 18</sup> While most strokes in AF can be prevented by oral anticoagulation, AF patients still have high cardiovascular death rates due to sudden death or progressive heart failure.<sup>19, 20</sup> Patients with AF also have significantly poorer QoL<sup>21</sup>, experiencing a variety of symptoms including lethargy, palpitations, dyspnoea, sleeping difficulties and psychosocial distress.<sup>22, 23</sup> In the context of patients diagnosed with heart failure, the presence of AF leads to higher rates of death and hospitalisation, independent of other risk variables or which condition comes first.<sup>24, 25</sup> From observational data, 40% of AF patients will be diagnosed with heart failure and vice-versa<sup>16</sup>, representing a large and growing unmet clinical need for healthcare improvement.

### 2.3 Rhythm-Control in AF

Numerous large RCTs comparing rhythm-control (using arrhythmic drugs and/or cardioversion) versus rate-control have identified no significant difference in clinical outcomes in patients with persistent AF.<sup>26-30</sup> In a number of studies, hospitalisation rates were actually higher in those randomised to rhythm-control.<sup>26, 29, 30</sup> Similar findings have been shown in AF patients with heart failure<sup>31, 32</sup>, both in those with impaired and preserved ejection fraction.<sup>33-35</sup> Although AF ablation is becoming increasingly popular to restore sinus rhythm, it remains a highly invasive method to improve AF-related symptoms.<sup>36, 37</sup> At present, European and NICE treatment guidelines recommend ablation only in symptomatic paroxysmal AF, or as a treatment option in symptomatic persistent AF that is refractory to other therapy.<sup>3</sup> Further trials are currently underway to determine the clinical value of prompt rhythm-control, including the Early treatment of Atrial fibrillation for Stroke prevention Trial (EAST).<sup>38</sup> In light of the high recurrence rate of AF (even in patients receiving intensive rhythm-control therapy), rate-control is an important part of AF management in almost all patients. Unfortunately, rate-control therapy has much less evidence underpinning its use.

### 2.4 Lack of Evidence to Guide Rate-Control Therapy

Rate-control in AF can be achieved with beta-blockers, non-dihydropyridine calcium-channel blockers (CCB), digoxin and their combinations. Unfortunately, little data exists to assist clinicians in choosing appropriate first-line and subsequent therapy. Current patterns of medication usage vary considerably (between and within countries). For example, in a worldwide registry, digoxin was prescribed in 2877 of 10,523 patients (27.3%), compared to 1599 of 3141 (50.9%) of patients in the German Competence NETwork on Atrial Fibrillation (AFNET).<sup>39, 40</sup>

Current European guidelines suggest “the choice of medication should be individualised and the dose modulated to avoid bradycardia”. This recommendation (Class 1, Level B) is based on a systematic review of trials addressing rate-control between 1983 and 1997.<sup>41</sup> Most of the studies included less than 50 participants (with several less than 10). The majority were low quality studies, as assessed by the risk of bias or confounding, and follow-up was typically in the order of

1  
2  
3 hours, days or weeks. Whilst this may be sufficient to assess an acute effect on heart-rate, it  
4 provides limited data on the longer-term effects of different treatments or the frequency of  
5 adverse reactions.  
6

7  
8 Beta-blockers are often preferred over other agents due to the prognostic benefit seen in patients  
9 with heart failure who are in sinus rhythm. However, in patients with heart failure, reduced LVEF  
10 and concomitant AF, we have shown that beta-blockers do not reduce mortality (hazard ratio  
11 0.97, 95% CI 0.83-1.14; p=0.73) or cardiovascular hospital admissions (hazard ratio 0.91; 95%  
12 CI 0.79-1.04; p=0.15).<sup>5</sup> This distinctly contrasts with the significant benefit seen in patients with  
13 sinus rhythm and highlights the need for further comparative RCTs specifically in patients with  
14 AF.  
15  
16  
17

18  
19 The most highly cited trial comparing beta-blockers and digoxin for rate-control in chronic AF was  
20 an open-label two-week crossover study of 5 drug regimes in 12 patients.<sup>42</sup> Peak heart-rate after  
21 exercise was significantly higher in those taking digoxin compared to beta-blockers but there  
22 were no differences in exercise duration. In a trial of 42 patients, rate-control was improved with  
23 combination beta-blocker/digoxin therapy compared to digoxin alone, however there were  
24 similarly no differences in exercise capacity.<sup>43</sup> Systematic review of other small randomised  
25 studies identify no difference in exercise tolerance with beta-blockers, despite a lowering of heart-  
26 rate.<sup>44</sup> From observational data, such as the Atrial Fibrillation Follow-up Investigation of Rhythm  
27 Management (AFFIRM) study, more cardiac and non-cardiac adverse effects have been noted  
28 with beta-blockers than digoxin (n=67 vs. n=38).<sup>28</sup> In a 3-week crossover study of 60  
29 participants, 10% withdrew during beta-blocker therapy due to adverse events.<sup>45</sup> Those in the  
30 beta-blocker group had a reduction in exercise capacity on cardio-pulmonary testing and a  
31 significant increase in B-type natriuretic peptide (BNP, a marker of ventricular strain) compared to  
32 patients treated with calcium-channel blockers.<sup>46</sup>  
33  
34  
35  
36  
37  
38  
39

40 Only a single RCT has been published comparing digoxin and beta-blockers in patients with AF  
41 and heart failure (mean LVEF 24%, n=47).<sup>47</sup> Although there was a marginally-significant  
42 improvement in LVEF with carvedilol/digoxin versus placebo/digoxin, blinded withdrawal of  
43 digoxin then led to a deterioration in LVEF, accompanied by an increase in BNP. There was no  
44 difference in the number of heart-rate pauses >3 seconds or in daytime/exercise heart-rate  
45 comparing the two therapies alone.  
46  
47  
48

49 Digoxin itself has been associated with an increased mortality in observational cohorts of AF  
50 patients<sup>48</sup>, however careful adjustment of baseline differences reject a true excess in adverse  
51 outcomes.<sup>49-51</sup> In a detailed systematic review of all studies published on digoxin, we identified  
52 that confounding was the main reason that digoxin was associated with increased mortality in  
53 observational studies, and confirmed a neutral association in RCTs (risk ratio 0.99, 95% CI 0.93  
54 to 1.05).<sup>6</sup> Lower rates of hospitalisation have been noted with digoxin therapy, independent of  
55 the type of heart failure<sup>52</sup>, however the lack of randomised data versus placebo (despite  
56 widespread clinical use) makes true comparison difficult. Small RCTs comparing CCB with  
57 digoxin have been inconsistent; two have identified lower heart-rates with CCB but no significant  
58 difference in exercise capacity<sup>42, 43</sup>, one demonstrated higher post-exercise cardiac output after  
59  
60

1  
2  
3 digoxin<sup>53</sup> and another showed improved exercise duration and QoL with CCB.<sup>54</sup> These results  
4 highlight the need for randomised data with appropriately-defined outcomes to accurately identify  
5 the benefits and risks of common therapies in patients with AF.  
6  
7

8  
9 An example where RCT data have impacted on clinical practice is the Rate Control Efficacy in  
10 Permanent Atrial Fibrillation (RACE II) trial. This study challenged conventional wisdom that  
11 stricter control of heart-rate would allow time for diastolic filling and improve haemodynamics. In  
12 summary, 614 patients with permanent AF were randomised to strict or lenient rate-control and  
13 followed for 2-3 years.<sup>55</sup> There was no significant difference in the cumulative incidence of the  
14 composite primary outcome; 14.9% in the strict-control arm and 12.9% in the lenient-control  
15 group. There were also no differences in symptoms, New York Heart Association (NYHA) class  
16 or hospitalisations<sup>55, 56</sup>, no interaction with baseline heart failure<sup>57</sup>, and those participants  
17 achieving strict rate-control required more clinic visits and higher doses of medical therapy.<sup>58</sup>  
18 Current guidelines therefore suggest that lenient rate-control is acceptable, except for patients  
19 with adverse symptoms or clinical deterioration.<sup>1</sup> Whilst this study provides important data on the  
20 intensity of rate-control in AF, the more clinically-relevant questions of how to initiate therapy and  
21 the choice of optimal agents for individual patients remain unanswered.  
22  
23  
24  
25  
26  
27

## 28 2.5 Patient Wellbeing

29  
30 Patient-reported outcomes are any report of a patient's health status (for example QoL) that is  
31 derived directly from the patient, without interpretation by a clinician.<sup>59</sup> There is limited data on  
32 the effect of pharmacological rate-control therapy on QoL and no comparative data assessing the  
33 benefit of different strategies.<sup>22, 60</sup> Rate-control has been associated with improved QoL scores in  
34 trials assessing rate versus rhythm-control.<sup>61, 62</sup> In the PIAF study, over 50% of participants  
35 randomised to calcium-channel blockers reported an improvement in health with significant  
36 benefits in the physical aspects of the SF-36.<sup>63</sup> A number of smaller studies have shown  
37 inconsistent effects on QoL in AF, although the data is limited by inclusion of patients with  
38 paroxysmal AF, a focus on heart rate and the use of a variety of QoL tools.  
39  
40  
41  
42  
43

44  
45 Current QoL questionnaires can be divided into disease-specific evaluations or generic health  
46 assessments (such as the Short Form Health Survey SF-36<sup>64</sup> or the EuroQol EQ-5D<sup>65, 66</sup>).  
47 However there is a distinct lack of knowledge regarding the mechanisms that underpin AF-related  
48 symptoms, the responsiveness of QoL questionnaires and their validity.<sup>60</sup> The Atrial Fibrillation  
49 Effect on QualiTy-of-life (AFEQT) questionnaire was designed to address these disparities by  
50 using more robust methods.<sup>67</sup> Although there is limited clinical application to-date, AFEQT has  
51 demonstrated sensitivity to clinical change.<sup>68</sup> An important objective of the research is to  
52 ascertain appropriate and responsive QoL tools for this population, as well as determine the  
53 acceptability and delivery of the questionnaires to patients.  
54  
55  
56  
57

## 58 2.6 Rationale for the RATE-AF Trial

59  
60 Rate-control is an integral part of management in all AF patients but hardly any controlled trial  
evidence exists to guide the choice of agents. We have shown that neither beta-blockers nor



1  
2  
3 digoxin has an impact on mortality in AF patients, even with concomitant heart failure, which  
4 highlights the need to determine treatment effects on quality of life and cardiac function.  
5  
6

### 7 8 **3 Trial Design and Objectives**

9  
10 **RATE-AF** is Prospective, Randomised Open-label Blinded Endpoint (PROBE) clinical trial  
11 comparing the use of digoxin and beta-blockers as initial rate control therapy.  
12  
13

14  
15 In this section, we discuss the trial design and study objectives. Detailed outcome measures are  
16 listed in **Section 12**.  
17

#### 18 19 **Justification for a PROBE rather than a Double Blind Trial Design**

20  
21 Although a double blind design would be the most robust trial design with respect to bias, it would  
22 not be ethical to do so in this scenario as clinicians would feel the need to add therapy according  
23 to heart rate. In addition, the RATE-AF Trial aims to test a strategy of initial care. PROBE trial  
24 design maintains the benefits associated with a strict randomisation procedure, while the blinded  
25 end points help to eliminate bias.  
26  
27

28  
29 The trial design aims for a pragmatic 'all-comers' approach, applicable to those seen in clinical  
30 practice to allow transfer of the findings to routine clinical management of patients with  
31 permanent AF.  
32  
33

#### 34 35 **Assessment and Management of Risk**

36  
37 This trial is categorised by the Medicines and Healthcare products Regulatory Agency (MHRA)  
38 as:  
39

##### 40 41 **Type A = No higher than the risk of standard medical care**

42  
43 The assessment and management of risk is detailed in the separate **RATE-AF** Risk Assessment  
44 document. An on-going evaluation of risk will continue throughout the recruitment period.  
45  
46

### 47 48 **3.1 Hypothesis**

#### 49 50 **Null Hypothesis for primary outcome:**

51  
52 No difference in patient-reported quality of life (measured using the physical functioning domain  
53 of the SF36 questionnaire) when comparing a strategy of digoxin versus beta-blocker therapy for  
54 initial rate control in patients with permanent AF.  
55  
56

#### 57 58 **Alternative Hypothesis:**

59  
60 Use of digoxin or beta-blocker therapy as initial rate control in patients with permanent AF is  
superior based on patient reported quality of life (measured using the physical functioning domain  
of the SF36 questionnaire).

### 3.2 Primary objective

- Patient-reported quality of life (QoL), with a predefined focus on physical well-being using the SF-36 physical component summary at six months.

### 3.3 Secondary objectives

- Generic and AF-specific patient-reported QoL using the SF-36 global and domain-specific scores, the AFEQT overall score and the EQ-5D-5L summary index and visual analogue scale at six and twelve months.
- Echocardiographic left-ventricular ejection fraction (LVEF) and diastolic function (E/e' and composite of diastolic indices) at twelve months.
- Functional assessment, including 6-minute walking distance achieved, change in European Heart Rhythm Association (EHRA) class and cognitive function at six and twelve months.
- Change in B-type natriuretic peptide (BNP) levels as a surrogate for total cardiac strain at six months.
- Change in heart rate from baseline and group comparison using 24-hour ambulatory ECG.

### 3.4 Feasibility objectives

- Successful methods for recruitment
- Key issues that affect retention of participants, such as convenience, compliance and cross-over (target of 85% study completion rate).
- Drug discontinuation rate and adverse reactions leading to drug discontinuation.
- Therapy-induced requirement for additional treatment (e.g. pacemaker implantation).
- Population-specific standard deviations and proportions to enable sample size calculation for a future trial.
- Assessment of cardiovascular outcomes including a composite of adverse clinical events (mortality, thromboembolic events, myocardial infarction and cardiovascular interventions).

### 3.5 Exploratory objectives

- Correlation of baseline measures, including QoL questionnaires and unblinded baseline investigations such as QoL, BNP, LVEF, E/e', EHRA, intracellular methods and heart rate.
- Impact of therapy on intracellular sodium and calcium concentration and cardiotonic steroid levels as biomarkers of cellular response at six and twelve months.

- Impact of combination therapy on outcomes, including comparison of bisoprolol/non-dihydropyridine calcium channel blocker (CCB) vs. bisoprolol/digoxin vs. digoxin/CCB vs. single therapies.
- Change in cognitive function at twelve months
- Qualitative research of patient-reported QoL using focus groups to explore patient acceptability, optimal delivery methods and responsiveness.
- Assessment of the validity and reproducibility of echocardiographic measures in patients with AF.
- Correlation of serum digoxin concentration with change in QoL and intracellular methods.
- Cost-consequence economic analysis from an NHS perspective.

## 4 Selection of Participants

Participants who potentially fulfil the inclusion criteria for this trial must have their eligibility confirmed by medically qualified personnel with access to and a full understanding of the potential participant's medical history. If eligibility has been assessed and documented by medically qualified personnel, then the process of obtaining informed consent may be delegated as appropriate and as documented on the **RATE-AF** Delegation and Signature Log.

### 4.1 Inclusion Criteria

- Adult patients aged 60 years or older
- Permanent AF, characterised (at time of randomisation) as a physician decision for rate-control with no plans for cardioversion, anti-arrhythmic medication, or ablation therapy
- Symptoms of breathlessness (New York Heart Association Class II or more)
- Able to provide written informed consent

### 4.2 Exclusion Criteria

- Established clinical indication for beta-blocker therapy, e.g. myocardial infarction in the last 6 months
- Known contraindications for therapy with beta-blockers or digoxin, e.g. a history of severe bronchospasm that would preclude use of beta-blockers, or known intolerance to these medications
- Baseline heart rate <60 bpm
- History of second or third-degree heart block
- Supraventricular arrhythmias associated with accessory conducting pathways (e.g. Wolff-Parkinson-White syndrome) or a history of ventricular tachycardia or fibrillation

- Planned pacemaker implantation (including cardiac resynchronisation therapy), pacemaker-dependent rhythm or history of atrioventricular node ablation
- Decompensated heart failure (evidenced by need for intravenous inotropes, vasodilators or diuretics) within 14 days prior to randomisation
- A current diagnosis of obstructive hypertrophic cardiomyopathy, myocarditis or constrictive pericarditis
- Received or on waiting list for heart transplantation
- Receiving renal replacement therapy
- Major surgery, including thoracic or cardiac surgery, within 3 months of randomisation
- Severe, concomitant non-cardiovascular disease (including malignancy) that is expected to reduce life expectancy

## 5 Informed Consent Process

It will be the responsibility of the Investigator to obtain written informed consent for each participant prior to performing any trial related procedure. If local practice allows, this responsibility may be delegated by the Principal Investigator, to a Research Nurse as captured on the Site Signature and Delegation Log. A Participant Information Leaflet (PIL) will be provided to facilitate this process. Investigators or delegate(s) will ensure that they adequately explain the aim, trial treatment, anticipated benefits and potential hazards of taking part in the trial to the participant. They will also stress that participation is voluntary and that the participant is free to refuse to take part and may withdraw from the trial at any time. The participant will be given adequate time to read the PIL and to discuss their participation with others outside of the site research team. The participant will be given the opportunity to ask questions.

If the participant expresses an interest in participating in the trial they will be asked to sign and date the latest version of the Informed Consent Form (ICF). The participant must give explicit consent for the regulatory authorities, members of the research team and representatives of the sponsor to be given direct access to the participant's medical records.

The Investigator or delegate(s) will then sign and date the form. A copy of the ICF will be given to the participant, a copy will be filed in the medical notes, and the original placed in the Investigator Site File (ISF). Once the participant is entered into the trial, the participant's unique trial identification number will be entered on the ICF maintained in the ISF. As part of the consent process, the participant will be asked to give explicit consent to their trial-related information being sent to the Trials Office at the University of Birmingham.

This trial will include **optional consent** to allow linkage to patient data available in NHS routine clinical datasets, including primary care data (e.g. Clinical Practice Research Datalink; CPRD, The Health Improvement Network; THIN, QResearch), secondary care data (Hospital Episode Statistics; HES) and mortality data from the Office of National Statistics (ONS) through The Health and Social Care Information Centre and other central UK NHS bodies. The consent will

1  
2  
3 also allow access to other new central UK NHS databases that will appear in the future. This will  
4 allow us to double check the main outcomes against routine data sources, and extend the follow-  
5 up of patients in the trial and collect long-term outcome and health resource usage data without  
6 needing further contact with the trial participants. This is important as it will link a trial of  
7 treatments that may become a clinical standard of care to long-term outcomes that are routinely  
8 collected in clinical data but which may be collected during the follow-up period of the trial.  
9  
10

11  
12 Details of the informed consent discussions will be recorded in the participant's medical notes.  
13 This will include date of discussion, the name of the trial, summary of discussion, version number  
14 of the PIL given to participant and version number of ICF signed and date consent received.  
15 Where consent is obtained on the same day that the trial related assessments are due to start, a  
16 note will be made in the medical notes as to what time the consent was obtained and what time  
17 the procedures started.  
18  
19  
20  
21

22 At each visit the participant's willingness to continue in the trial will be ascertained and  
23 documented in the medical notes. Throughout the trial the participant will have the opportunity to  
24 ask questions about the trial. Any new information that may be relevant to the participant's  
25 continued participation will be provided. Where new information becomes available which may  
26 affect the participants' decision to continue, participants will be given time to consider and if  
27 happy to continue will be re-consented. Re-consent will be documented in the medical notes.  
28 The participant's right to withdraw from the trial will remain.  
29  
30  
31  
32

33 Electronic copies of the PIL and ICF will be available from the Trials Office and will be presented  
34 on the headed paper of the local institution. Details of all participants approached about the trial  
35 will be recorded on the Participant Screening/Enrolment Log and with the participant's prior  
36 consent, their General Practitioner (GP) will also be informed that they are taking part in the trial.  
37  
38  
39  
40

## 41 **6 Enrolment and Randomisation**

42  
43 A flowchart of the recruitment process is shown in the Trial Schema (**Figure 1**) together with the  
44 schedule of investigation. **Section 9** gives more detailed information of trial procedures and  
45 assessments.  
46  
47  
48

49 In the majority, potentially eligible participants will be identified by their Cardiologist, usually  
50 following referral from their General Practitioner (GP), and provided with an ethically-approved  
51 patient information leaflet (PIL). The patient will then be invited to attend a baseline visit at the  
52 NIHR Wellcome Trust Clinical Research Facility (WTCRF) at Queen Elizabeth Hospital,  
53 Birmingham. Potentially eligible participants may also be identified from inpatient referrals; these  
54 patients will be provided with a PIL and invited to attend a baseline visit following the same  
55 procedure.  
56  
57  
58  
59

60 GP Practices in the Birmingham area may be asked to refer patients that present with AF, but are  
not on medication, to the RATE-AF Research Team at University Hospitals Birmingham (UHB).  
These patients will be given a one-page, ethics committee-approved trial summary and asked to

1  
2  
3 sign a contact details form to confirm that they are happy to be contacted by a member of the  
4 Research Team to arrange an appointment.  
5  
6

7 Prior to patients undertaking any trial-related procedures, informed consent will be obtained.  
8

9  
10 Details of all patients approached about the trial should be recorded on the **RATE-AF** Screening  
11 & Enrolment Log. This Log should be maintained within the Investigator Site File.  
12  
13

## 14 **6.1 Randomisation Procedures**

15  
16 After all eligibility criteria have been confirmed and informed consent has been received, the  
17 participants can be randomised into the **RATE-AF** trial.  
18  
19

20  
21 Participants will be randomised in a 1:1 ratio to either **Digoxin 62.5 – 250 µg od or Bisoprolol**  
22 **1.25 – 15 mg od**. The time between randomisation and commencement of trial therapy should  
23 be minimised (ideally <24 hours). Randomisation will be provided by a computer generated  
24 programme at the Birmingham Clinical Trials Unit (BCTU), using a minimisation algorithm to  
25 ensure balance between the arms with regard to important clinical variables, stratifying for  
26 baseline EHRA (class 1/2a and 2b/3/4) and gender.  
27  
28  
29

### 30 **Telephone and Online Randomisation**

31  
32 Participants can be randomised into the trial via a secure 24 hour internet based randomisation  
33 service (<https://www.trials.bham.ac.uk/RATEAF>) or by a telephone call to the BCTU (telephone  
34 number **0800 953 0274**). Telephone randomisations are available Monday-Friday, 09:00-17:00.  
35 For the secure internet randomisation, each site and each randomiser will be provided with a  
36 unique log-in username and password in order to access the online system. Online  
37 randomisation is available 24 hours a day, 7 days a week, apart from short periods of scheduled  
38 maintenance and occasional network problems.  
39  
40  
41  
42

43 Randomisation Forms will be provided to investigators and should be completed and used to  
44 collate the necessary information prior to randomisation. Once all eligibility criteria have been  
45 provided and confirmed, a Trial Number and treatment allocation be given and relevant parties  
46 notified, including the participant's GP.  
47  
48  
49

### 50 **Back-up Randomisation**

51  
52 If the internet based randomisation service is unavailable for an extended period of time, a back-  
53 up paper randomisation will also be available at the BCTU. The randomisation list will be  
54 produced using a random length block design. In this instance, investigators should ring the  
55 BCTU randomisation service (telephone number **0800 953 0274**).  
56  
57  
58  
59  
60

## 7 Trial Treatment

### 7.1 Treatment

The Investigational Medicinal Products (IMPs) for this trial are Digoxin and Bisoprolol.

At randomisation, participants will be allocated to open-label treatment with either Digoxin 62.5 – 250 µg od or Bisoprolol 1.25 – 15 mg od.

#### Digoxin

Digoxin is a cardiac glycoside derived from the foxglove plant. The cardiac effects of digoxin therapy are summarised by:

- Positive inotropic effects: increased intracellular calcium due to direct inhibition of sodium-potassium adenosine triphosphatase (Na/K-ATPase)
- Negative chronotropic effects: decreased conduction velocity through the atrioventricular node, an increase in the effective refractory period and an increase in vagal activity leading to sinus node depression.

Clinically, digoxin is commonly prescribed in two conditions, heart failure and AF.

#### Bisoprolol

Bisoprolol fumarate is a highly beta-1 selective adrenoreceptor blocker first approved by the U.S. Food and Drug Administration in 1992. The cardiac effects of bisoprolol therapy are summarised by:

- Negative chronotropic effects: a reduction in resting and exercise heart rate due to prevention of norepinephrine and epinephrine from binding to the beta-receptor in cardiac conduction tissue.
- Negative (mild) inotropic effects: an initial fall in resting and exercise cardiac output with little observed change in stroke volume and only a small increase in right atrial pressure or pulmonary capillary wedge pressure.

Clinically, bisoprolol is commonly prescribed in a range of cardiology conditions, including post-myocardial infarction, heart failure and in patients with atrial tachyarrhythmia, including AF.

### 7.2 Treatment Supply and Storage

Due to the participant population and the fact that the trial closely aligns with standard care, trial medication may be dispensed from routine standard stock by both the pharmacy at the research site and community pharmacies local to the participant. Both treatments are used as per normal clinical practice therefore there is no additional requirement, above that of local policy, to monitor temperature during storage.

## Digoxin

Digoxin is available as an oral tablet in doses of 62.5, 125 and 250 µg or as an elixir (50 µg/mL). It is packaged in 28 or 500 tablet packs under the generic title digoxin and trade label Lanoxin.<sup>69</sup> Digoxin should be stored according to local policy.

## Bisoprolol

Bisoprolol is available as an oral tablet in doses of 1.25, 2.5, 3.75, 5.0, 7.5 and 10 mg. It is packaged as 28 tablets under the generic title bisoprolol fumarate and trade labels Cardicor and Emcor.<sup>69</sup> Bisoprolol should be stored according to local policy.

## 7.3 Dosing Schedule

### Digoxin

An advice sheet for the investigator is presented in **Appendix A**.

Trial maintenance doses will initially be 62.5 or 125 µg orally (at the clinician's discretion, taking into account age and renal function), with planned up-titration to 125/250 µg. The maximum trial dose will be 250 µg daily.

A single loading dose of four tablets (250 or 500 µg according to target maintenance dose) will be prescribed in digoxin-naïve participants. The clinician is permitted to omit the loading dose or prescribe a second, where necessary.

Unblinded serum digoxin concentrations will be assessed at visits 2 and 3, with results reported back to the relevant clinician(s). This process will assist in monitoring compliance, adjusting dosage in cases of low serum levels and avoiding toxicity.

### Bisoprolol

An advice sheet for the investigator is presented in **Appendix B**.

Trial starting doses will be 1.25 or 2.5 or 5 mg (at the clinician's discretion), with planned up-titration to 10 mg in increments of 1.25 or 2.5 mg. The maximum trial dose will be 15 mg daily. No loading dose is required.

Plasma concentrations have not shown to be associated with toxicity and are not part of standard clinical practice.

## 7.4 Drug Interactions and Contraindications

### Digoxin

Following oral administration of digoxin, approximately 60–85% of the dose is usually absorbed, mainly from the small intestine. The onset of action is 0.5-2 hours and maximal effects occur in



1  
2  
3 2-6 hours. Digoxin has a large volume of distribution and approximately 20-30% of digoxin in  
4 blood is bound to plasma proteins. Metabolism is minimal but variable, with the majority of drug  
5 excreted unchanged in the urine by glomerular filtration and tubular secretion. With normal renal  
6 function, the elimination half-life is 34-44 hours which is prolonged in patients with renal failure by  
7 two to threefold. Dose adjustment is unnecessary in patients with hepatic impairment.  
8 Therapeutic plasma concentrations of digoxin have been described as 0.5-2.0 ng/mL.<sup>70</sup> In  
9 digoxin-naïve patients with normal renal function, approximately seven days are required to reach  
10 steady-state therapeutic concentrations if a loading dose is omitted. As such, the majority of  
11 clinicians prescribe one or two loading doses, totalling 500 to 1000 µg over 24 hours.  
12  
13  
14

15  
16 Caution is recommended in patients with electrolyte disturbance (due to increased risk of toxicity)  
17 and reduced doses are recommended in patients with renal impairment. There are no concerns  
18 in pregnancy or with breast-feeding, although dose adjustment may be required.  
19  
20  
21

22 Contraindications for digoxin therapy include heart block, accessory pathway supraventricular  
23 tachycardia and a current diagnosis of obstructive hypertrophic cardiomyopathy, myocarditis or  
24 constrictive pericarditis.  
25  
26

27 Digoxin has been associated with a number of adverse effects, although data from randomised  
28 trials show little difference in comparison to placebo, apart from cases of toxicity (2% versus 0.9%  
29 respectively in the DIG trial of patients with HF)<sup>71</sup>. The most common side effects are  
30 gastrointestinal upset, dizziness, blurred vision, headache and rash. In toxic states (serum levels  
31 >2 ng/mL), digoxin is pro-arrhythmic and can aggravate heart failure, particularly with co-existent  
32 hypokalaemia. In cases of overdose, repeated early doses of activated charcoal may be given to  
33 reduce absorption and in severe toxicity, digoxin-specific antibody fragments are available as an  
34 intravenous infusion.  
35  
36  
37  
38

39 In rigorous assessment, drug interactions with digoxin have proved inconsistent.<sup>72</sup> Serum digoxin  
40 concentrations are increased by amiodarone, dronedarone, propafenone and quinidine but  
41 increased bioavailability with CCB and certain antibiotics (such as erythromycin and tetracycline)  
42 only occur in selected patients. The risk of toxicity increases with drugs that cause electrolyte  
43 disturbances, such as thiazide and loop diuretics.  
44  
45  
46  
47

## 48 **Bisoprolol**

49 Following oral administration of digoxin, the absolute bioavailability is approximately 80%, first  
50 pass metabolism of 20% and 30% protein binding. Peak plasma concentrations occur within 2-4  
51 hours, the elimination half-life is 9-12 hours and steady state is attained within 5 days.  
52 Elimination occurs equally by renal and non-renal pathways with about 50% of the dose  
53 remaining unchanged in the urine.  
54  
55  
56  
57

58 Caution is recommended in patients with first-degree heart block, portal hypertension, diabetes, a  
59 history of obstructive airways disease, myasthenia gravis, a history of hypersensitivity and  
60 psoriasis, although many cardiologists use beta-blockers frequently in these groups with  
appropriate supervision. In pregnancy, beta-blockers may cause intra-uterine growth restriction,

1  
2  
3 neonatal hypoglycaemia, and bradycardia (although as above, these agents are frequently used  
4 in pregnancy). There is a theoretical risk of toxicity in breast feeding, although the amount  
5 present in milk is likely too small to affect infants. Abrupt withdrawal should be avoided,  
6 especially in cases of ischaemic heart disease. Up-titration should be more cautious in patients  
7 with renal or hepatic impairment.  
8  
9

10  
11 Contraindications for bisoprolol therapy include cardiogenic shock, overt cardiac failure, second  
12 or third degree heart block, marked sinus bradycardia and severe peripheral arterial disease.  
13  
14

15 Bisoprolol has been associated with a wide variety of adverse effects although data from RCTs  
16 suggest similar discontinuation rates compare to placebo.<sup>5, 73</sup> The most common adverse  
17 symptoms are lethargy, headache, peripheral oedema, upper respiratory tract symptoms,  
18 gastrointestinal upset and dizziness. In cases of overdose, bradycardia, hypotension, congestive  
19 heart failure, bronchospasm and hypoglycaemia may be expected, with treatment directed to  
20 supportive methods and atropine, fluids, glucagon or diuretics as required.  
21  
22  
23

24  
25 Pharmacokinetic interactions with beta-blockers have not shown to be clinically significant. Drugs  
26 that reduce absorption include aluminium salts and cholestyramine, whilst metabolism can be  
27 increased by barbiturates and rifampicin and decreased with cimetidine, erythromycin,  
28 fluvoxamine, and hydralazine.  
29  
30

### 31 **7.5 Accountability Procedures and Labelling**

32  
33  
34 Through the risk-adapted approach, a full risk assessment of the **RATE-AF** trial has been  
35 conducted including the drug accountability requirements. The IMPs will be used within their  
36 authorisations, prescribed on an NHS prescription and dispensed by pharmacy from standard  
37 stock. The risk assessment has determined that a normal dispensing label is appropriate and an  
38 additional clinical trial label is not necessary (as covered by Regulation 46 (2) of SI 2004/1031).  
39 Drug accountability will be according to standard practice for NHS prescriptions. Details of how  
40 compliance will be assessed can be found in **Section 7.7**.  
41  
42  
43  
44

### 45 **7.6 Treatment Modification**

46  
47  
48 Patients that withdraw from medication for any reason will do so under strict clinical supervision.  
49  
50

51 The trial is designed to assess the impact of **initial** impact of rate control therapy; it is expected  
52 that treatments will modify during the trial period (in particular, the addition of therapy to attain  
53 heart rate targets). Patients will not be withdrawn from the trial if they commence therapy from  
54 the other arm of the trial due to any absolute or relative clinical indications (for example, patients  
55 in the digoxin arm starting beta-blockers due to incident myocardial infarction, or heart failure with  
56 reduced LVEF).  
57  
58  
59  
60

## 7.7 Assessment of Compliance

We will ask participants about compliance with their trial medication at each follow-up visit and this will be documented in the CRFs. It may also be clinically evident from the heart rate check, performed as part of all visits, whether or not the patient has been compliant with their trial medication.

In addition, patients that are randomised to the digoxin arm will have a serum digoxin sample taken as part of Visit 2 (month 6) and Visit 3 (month 12) follow-ups. The results will indicate whether the patient has been compliant with their trial medication.

## 8 Trial Procedures and Schedule of Assessments

### 8.1 Baseline Visit

The baseline visit will occur as soon as possible after screening and will involve the following procedures (see **Section 9** for procedure details):

- Verify inclusion/exclusion criteria.
- Obtain written informed consent from the potential participant.
- Randomise the patient via telephone or the secure web-based system as outlined in **Section 6**
- Administer QoL and functional capacity questionnaires.
- Review recent blood results (within 6 months of Baseline Visit)
  - Assessing renal function to aid in dose assignment and serum potassium level as part of standard clinical care.
- Document the use of oral anticoagulation and arrange appropriate prescription for patients not on therapy according to clinical guidelines. If the participant is already receiving vitamin-K antagonists (VKA), recent INR results will be documented.
- Record results of physical examinations.
- Collect blood samples for baseline blood tests and biomarker analysis.
- Complete case report form (CRF)
- Perform a 12-lead electrocardiogram.
- Supervise a 6-minute walk test, recording distance walked and peak heart rate.
- Arrange the baseline echocardiogram; images will be delivered to the echocardiographic core laboratory for blinded reporting.
- Discuss the randomised allocation with the participant including schedule for drug therapy and up-titration.

Participants will be followed up by telephone call two weeks after the Baseline Visit to ensure they have commenced trial medication.

## 8.2 Up-Titration Visits

For the majority of participants, two up-titration visits will be planned to supervise the appropriate use of medications as per the up-titration schedule (see **Appendices A and B**). Additional up-titration visits, as required, are acceptable in order to attain a heart rate at rest of  $\leq 100$ bpm.

Up-titration visits will involve the following procedures:

- Record adverse events as reported by the participant or observed by the investigator.
- Review of medications and plan for trial drug up-titration
- Assessment of compliance
- Symptom-directed clinical examination
- Vital signs, including heart rate and blood pressure
- Administer QoL and functional capacity questionnaires (last up-titration visit only).
- Organise a 24-hour ambulatory ECG once up-titration completed (results to be forwarded to the clinician).

## 8.3 Visit 2, Month 6

Visit 2 will occur at an interval of six months ( $\pm$  four weeks) after the Baseline Visit and involve the following procedures:

- Administer QoL and functional capacity questionnaires.
- Record adverse events as reported by the participant or observed by the investigator.
- Confirm current rate control therapy (including dosage) and check concomitant medications.
- Assessment of compliance.
- Collect blood samples for biomarker analysis.
- Collect blood sample for serum digoxin concentration, potassium and creatinine as part of standard clinical care.
- Record time in therapeutic range for patients on anticoagulation with vitamin-K antagonists and compliance in patients receiving non-VKA oral anticoagulants.
- Obtain a twelve lead ECG.
- Record the results of physical examinations and vital signs.
- Supervise a 6-minute walk test, recording distance walked and peak heart rate.
- Complete other CRF requirements.
- If an echocardiogram has been performed for clinical reasons since the previous visit, images will be retrieved and sent to the core echocardiographic laboratory.

- Confirm appointment date for Visit 3.

#### 8.4 Visit 3, Month 12 (Final Trial Assessment)

Visit 3 will occur at an interval of 12 months ( $\pm$  four weeks) after the Baseline Visit and involve the following procedures:

- Administer QoL and functional capacity questionnaires.
- Record adverse events as reported by the participant or observed by the investigator.
- Confirm current rate control therapy (including dosage) and check concomitant medications.
- Assessment of compliance.
- Transthoracic echocardiography (as per **Section 9.6**), with images delivered to the echocardiographic core laboratory for blinded reporting.
- Collect blood sample for serum digoxin concentration, potassium and creatinine as part of standard clinical care.
- Record time in therapeutic range for patients on anticoagulation with vitamin-K antagonists and compliance in patients receiving non-VKA oral anticoagulants.
- Obtain a twelve lead ECG.
- Record the results of physical examinations and vital signs.
- Supervise a 6-minute walk test, recording distance walked and peak heart rate.
- Complete other CRF requirements.
- If an echocardiogram has been performed for clinical reasons since the previous visit, images will be retrieved and sent to the core echocardiographic laboratory.
- Complete the end of trial standardised letter to the GP and clinician explaining that the participant has reached the end of the trial protocol and is no longer bound by their allocated medication strategy. Advise that all participants are invited for continued follow up and long term clinical outcome assessment.
- Provide final instructions to participant (e.g. follow-up of ongoing adverse events).

#### 8.5 Investigator-blinded Endpoints

Investigator-blinded endpoints (PROMs, echocardiography and biomarkers) will be assessed by the core laboratory, identified only by the trial number. Ambulatory ECG and serum digoxin level will remain unblinded and results delivered to the responsible clinician.

#### 8.6 Long Term Follow-Up

In patients who have agreed to NHS data linkage, a follow-up CRF will be completed. The CRF will capture items that include, but are not limited to death, hospital admissions and

1  
2  
3 cardiovascular events. The planned interval for outcome assessment is 2 and 5 years post-  
4 enrolment.  
5  
6

## 7 **8.7 Withdrawal**

8  
9  
10 Participants may withdraw at any time during the main **RATE-AF** trial if they choose not to  
11 continue or if their clinical team feel that continued participation in the trial is inappropriate.  
12

13 An investigator may deem it necessary to withdraw a participant from the trial if:

- 14  
15 1) Any clinical adverse event, laboratory abnormality, or other medical condition or situation  
16 occurs such that continued participation in the trial would not be in the best interest of the  
17 participant.  
18
- 19  
20 2) The participant meets an exclusion criterion (either newly developed or not previously  
21 recognised) that precludes further trial participation.  
22

23 Full details of the reason(s) for withdrawal should be recorded on the Case Report Forms (CRFs)  
24 if healthcare professional-initiated, otherwise a simple statement reflecting patient preference will  
25 suffice.  
26

27 Clear distinction will be made between withdrawals from trial treatments whilst allowing further  
28 follow-up, and any participants who refuse any follow-up. If a participant explicitly withdraws  
29 consent to any further data recording, then this decision will be respected. All communications  
30 surrounding the withdrawal will be noted in the participant's records and no further data will be  
31 collected for the participant.  
32  
33

34  
35 In the case of missing echocardiographic outcome data due to withdrawal (but with consent for  
36 ongoing follow-up) or death, results of recent clinical echocardiography will be retrieved. The  
37 participant's permission to obtain such data will be obtained and documented during the consent  
38 process. As with all trial echocardiograms, the scan will be reported by the core  
39 echocardiographic laboratory. With respect to patient-reported outcomes, QoL questionnaires  
40 will be mailed to participants who withdraw from trial treatment but consent to ongoing follow up.  
41 Those patients where adverse symptoms were related to withdrawal will be invited to a focus  
42 group for further discussion.  
43  
44  
45  
46  
47

## 48 **8.8 Trial Duration**

49  
50  
51 Patients will be on trial medication for 12 months and will be followed-up, during this period  
52 according to the protocol. At the end of the 12 months, the participants may, as determined by  
53 their clinician, continue on medication but it will not be considered part of the trial intervention.  
54 The trial will cease when the 12-month follow-up has been completed for the last participant  
55 recruited.  
56  
57  
58  
59  
60

Table 1: Schedule of Assessments

| Procedures                          |                  | Baseline Visit | Up-titration Visits<br>(Day 14 to 60) | Visit 2, Month 6<br>(± 4 weeks) | Visit 3, Month 12<br>(± 4 weeks) |
|-------------------------------------|------------------|----------------|---------------------------------------|---------------------------------|----------------------------------|
| Assessment of eligibility criteria  |                  | X              |                                       |                                 |                                  |
| Informed consent taken              |                  | X              |                                       |                                 |                                  |
| Review of medical history           |                  | X              |                                       |                                 |                                  |
| Review of medications               |                  | X              | X                                     | X                               | X                                |
| Physical exam                       | Complete         | X              |                                       |                                 |                                  |
|                                     | Symptom-directed |                | X                                     | X                               | X                                |
|                                     | Vital signs      | X              | X                                     | X                               | X                                |
| Quality of life assessment          |                  | X              | (X)                                   | X                               | X                                |
| Functional and cognitive assessment |                  | X              |                                       | X                               | X                                |
| Transthoracic echocardiogram        |                  | X              |                                       |                                 | X                                |
| 12-lead electrocardiogram           |                  | X              |                                       | X                               | X                                |
| 6-minute walk test                  |                  | X              |                                       | X                               | X                                |
| 24-hour ambulatory ECG              |                  |                | X                                     | (X)                             |                                  |
| Clinical labs                       | Chemistry        | X              |                                       | X                               | X                                |
|                                     | Haematology      | X              |                                       | X                               | X                                |
|                                     | Serum digoxin    |                |                                       | (X)                             | (X)                              |
| Trial labs                          | BNP              | X              |                                       | X                               |                                  |
|                                     | Stored sample    | X              |                                       | X                               |                                  |
| Assessment of compliance            |                  |                | X                                     | X                               | X                                |
| Assessment of adverse events        |                  |                | X                                     | X                               | X                                |

Parentheses denote where a procedure is dependent on the stage of participants within the trial.

## 9 Trial Procedures

### 9.1 Procedures Defined as Standard Clinical Care

The following assessments are considered part of the standard clinical care of AF patients receiving heart rate control therapy and will occur at all trial visits:

- Blood tests for haemoglobin, serum creatinine, potassium and serum digoxin concentration; these will be obtained by the research nurse and submitted to the site-specific hospital laboratory as per local guidelines and SOPs, ensuring that all specimens are accurately labelled and handled appropriately. In the case of results requiring urgent action, local policies will be followed which may include the participant visiting their GP, local hospital or investigator. In all cases, appropriate trial documentation will be completed.
- A 12-lead ECG; these will be completed by appropriately trained local staff.

### 9.2 Medical History

Medical history will be obtained by interview and from medical records (physical and electronic) at the Baseline Visit comprising:

- Cardiovascular history, including prior ischaemic coronary disease, interventions and surgery, history of hypertension, heart failure or hyperlipidaemia, stroke or transient ischaemic attack, pulmonary embolus/deep vein thrombosis and peripheral vascular disease.
- AF history, including year of diagnosis, previous cardioversions, previous ablation therapy and anti-arrhythmic drug history.
- Pacemaker history, including date and reason for implantation, type of device (single-chamber, dual-chamber, biventricular, implanted defibrillator) and dependency.
- Non-cardiac history, including diabetes mellitus, airways disease (asthma/COPD), renal impairment, bleeding history and other major co-morbidities.
- Social and demographic history, including smoking status (current/ex/never), race (Caucasian/Indian subcontinent/Asian/African/other) and physical activity using the International Physical Activity Questionnaire (short form).

### 9.3 Medication History

Medications history will be assessed according to the categories below and include current dosage. Except for anticoagulation, antiarrhythmic and rate control therapies, only current medications will be included.

- Anticoagulation therapy (vitamin-K antagonists and novel agents), including past use, INR results and time in therapeutic range.
- Antiarrhythmic therapy, including past use.



- Rate control therapy (beta-blockers, digoxin, CCB), including past use.
- Antiplatelet therapy.
- Angiotensin-converting enzyme inhibitors or angiotensin receptor blockers.
- Aldosterone antagonists.
- Diuretics (loop, thiazide, potassium-sparing, others).
- Nitrates.
- Other anti-hypertensive/anti-anginal therapy.
- Statins.
- Other lipid-lowering medication.
- Diabetic medication and insulin.
- Asthma/COPD medication (including inhalers).
- Non-steroidal anti-inflammatory agents.

## 9.4 Physical Examination

Physical and vital signs will be assessed at all up-titration and trial visits. In most cases, a targeted physical examination will be performed, comprising of cardiovascular elements as summarised below:

- Heart rate (manual palpation at radial artery and apex).
- Heart sounds.
- Lung auscultation.
- Assessment of jugular venous pressure and/or peripheral oedema.
- Other focused examinations according to symptoms and complaints.
- Blood pressure (two measurements at the right brachial in a seated position preferred, using a validated oscillometric device).
- Height (Baseline Visit only), weight (all listed visits) and waist circumference (Baseline Visit; defined as the narrowest point between ribs and hips when viewed from the front after exhaling to the nearest centimetre).

## 9.5 Patient Reported Outcomes

### 9.5.1 Choice of Outcomes and Qualitative Research

A systematic review (according to and in collaboration with the COnsensus-based Standards for the selection of health Measurement Instruments, COSMIN<sup>74</sup>) is underway to evaluate PROMs in AF, with a focus on psychometric properties including internal consistency, reliability, and measurement error. Additional assessment and practical evaluation of PROMs will follow published guidance<sup>75, 76</sup>, complementing qualitative research using patient focus groups, surveys

1  
2  
3 and directed interviews guided by the PROMs and qualitative research centres at the University  
4 of Birmingham.<sup>77</sup>  
5  
6

7 Instruments for assessment will be selected on the basis of overall validity, preferably in this  
8 patient population but including other groups where data are limited. Patient focus groups will  
9 allow exploration of patient perspectives on appropriate instruments that adequately reflect the  
10 experience of living with AF.<sup>78</sup> They will also allow comparison of QoL questionnaires that  
11 adequately summarise patient-prioritised components of their health and well-being. Additional  
12 focus groups and individual interviews will occur at interim and final follow-up during the trial.  
13 These aim to understand the patient experience of trial participation and processes, including the  
14 ease of completion of QoL questionnaires, relevance, reasons for non-completion and other  
15 feasibility issues that emerge during the trial e.g. non-compliance and recruitment, with reference  
16 to core outcome sets for this population.<sup>79</sup> A patient and public involvement (PPI) panel will  
17 contribute to all stages in the focus group process.<sup>80</sup>  
18  
19  
20  
21  
22

23 This protocol was developed in accordance with the Standard Protocol Items for Randomized  
24 Trials [SPIRIT] statement<sup>81</sup>, and the latest PROM-specific guidance from the International Society  
25 for Quality of Life Research (ISOQOL) Best Practice taskforce.<sup>77, 82, 83</sup>  
26  
27  
28  
29

### 30 **9.5.2 Data Collection for PROMs**

31 PROMs will be assessed at all main visits (Baseline, 2 and 3) and at the participants final up-  
32 titration visit (if applicable). The QoL tools used will be EQ-5D-5L, SF-36 and AFEQT. To avoid  
33 introducing co-intervention bias, all QoL data will be kept confidential and will not be used to  
34 inform clinical care.<sup>84</sup> Patients will be advised of this in the patient information sheet. PROMs will  
35 be collected at the start of each visit, before other trial procedures. In cases where the visit  
36 coincides with a clinician review, questionnaires should be completed in advance. The feasibility  
37 of using an online data collection tool will be explored, administered by trained research nurses  
38 and according to good-practice guidelines.<sup>85</sup> We will use this trial to perform an initial small-group  
39 assessment of electronic PROMs-equivalence to inform a future clinical event trial.  
40  
41  
42  
43  
44

45 Qualitative research will be performed using a focus group of 10 volunteer patients enrolled at the  
46 start of the trial (5 in each randomised group). The focus group will meet after up-titration and  
47 then at 6 and 12 months. Detailed methods will be established before the first meeting, in  
48 collaboration with the University of Birmingham Qualitative Research Group.  
49  
50  
51

52 All staff will receive training in QoL collection, with specific guidance on reducing introduced bias,  
53 minimising missing data and coaching participants to use the QoL software. Levels of missing  
54 PROMs data will be monitored. The site personnel responsible for collection of patient reported  
55 outcomes will be the Research Nurse under the supervision of the Principal Investigator.  
56  
57  
58  
59  
60

### 9.5.3 Outcome Appraisal

Each QoL tool will be scored according to their published requirements ([www.euroqol.org](http://www.euroqol.org); [www.sf-36.org](http://www.sf-36.org); [www.afect.org](http://www.afect.org)), using total and sub-category scores where appropriate.

To avoid dilution of effect over time, the primary analysis will be at six months (adjusting for baseline QoL and stratification variables). We have predefined a focus on physical well-being, which we hypothesize are where the greatest treatment effects will be observed, but will explore all aspects of QoL. Exploratory analysis of medication effects over the 12-month period will also be analysed and remain clinically important, as little data currently exists on the longer-term profile of QoL in AF.

Qualitative research outcomes will focus on the clinical responsiveness of the QoL instruments. The findings of the COSMIN systematic report will determine these outcomes and their relevant appraisal.

The RATE-AF trial will allow us to gain an initial understanding and framework of the patient experience of AF. We aim to begin the process of determining appropriate and responsive PROMs for AF patients and the optimum methods for delivery into a subsequent large-scale clinical trial.

## 9.6 Transthoracic Echocardiography

Echocardiography will be performed at Visits 1 and 3 and focus on systolic left-ventricular (LV) function, diastolic function and left-atrial assessment. Images will be obtained by an accredited echocardiographer. All trial echocardiograms will be labelled with the Trial Number and pseudoanonymised patient data, with specific instruction that the echocardiographer will remain blinded to the treatment assignment. All images will be archived to the core echocardiographic laboratory, with a copy retained in the site file.

### 9.6.1 Reproducibility and Validity of Measurements

Inter-observer and intra-observer variability in measurement will be assessed by comparing results of the stated methods discussed below across the cardiac cycle. To evaluate the minimum number of repeat measurements required that maintains clinical utility, reproducibility of single measurements will be compared to averages of 3/5/10 beats. This will also include the reliability of using an 'index beat' with a cycle length equivalent to a heart rate of 70-80 beats per minute, or with similar preceding and pre-preceding RR intervals.

### 9.6.2 Systolic LV Function

Systolic LV function will be determined by the following methods:

- Two-dimensional biplane Simpson's method utilising the simultaneous multi-planar approach to obtain LVEF in a single heartbeat (four and two-chamber views). In each

view, LV end-diastolic and end-systolic volumes (LVEDV, LVESV) are computed, with LVEF calculated as  $(LVEDV - LVESV) / LVEDV$ . Two-dimensional echocardiography has excellent spatial resolution but is limited by potential foreshortening of the ventricular apex and drop-out of the endocardial border.

- Standard Simpson's biplane method with four and two-chamber volumes obtained from separate heartbeats. This is the conventional method in current clinical use but is limited by varying RR intervals in AF.
- Fractional shortening on M-mode along the minor-axis of the left-ventricle (parasternal long-axis), calculated by the formula:  $(LV \text{ internal dimension in diastole} - LV \text{ internal dimension in systole}) / LV \text{ internal dimension in diastole}$ . M-mode measurements are reproducible and easy to perform with excellent temporal resolution, but are limited in cases of regional wall motion abnormalities and in patients where the true minor-axis is difficult to visualise.
- Both automated endocardial tracking and speckle-tracking analysis will be utilised (where available) by the echocardiographic core laboratory. Multiple planes will be obtained (four-chamber, two-chamber and short-axis mid-ventricle views). These methods have the advantage of reducing operator time and are angle-independent, but rely on good ultrasound windowing. Global longitudinal systolic strain using 2D speckle-tracking has recently been proposed as an important marker for adverse cardiovascular outcomes in AF.<sup>86</sup>
- Three-dimensional full-volume analyses of LV function, with single-beat analysis where feasible. This method has the advantage of not relying on geometric assumptions and allows the acquisition of full volume data within a single heartbeat. It correlates well with gold standard methods such as cardiac magnetic resonance imaging, but relies on adequate ultrasound windowing.
- Peak S-wave on tissue Doppler imaging (TDI) of the mitral valve annular sub-endocardium. This method has good correlation with LVEF across a wide range of function and is obtainable in patients with poor acoustic windows, but is limited in cases of regional wall motion abnormality.

Where poor quality acoustic windows limit accurate assessment of LV function, use of an intravenous contrast agent is recommended in participants without known allergy.

### 9.6.3 Diastolic LV Function

Diastolic LV function will be determined using the following methods (in all cases repeated over 3-5 cardiac cycles):

- Mitral inflow pulse-wave Doppler peak E velocity and deceleration time (DT).
- Mitral annular TDI to calculate septal E', lateral E' and the individual and averaged E/E' ratios.
- LV outflow tract pulse-wave Doppler to calculate isovolumic relaxation time (IVRT).

- Pulmonary vein pulse-wave Doppler to calculate peak systolic (where present) and diastolic velocities, ratio of peak velocities and DT of diastolic PV flow.
- Colour M-mode Doppler assessment of mitral flow propagation velocity (Vp) and ratio of E/Vp.

Overall diastolic function will be categorised according to the British Society of Echocardiography guidelines into normal function or mild/moderate/severe dysfunction based on a combination of the above variables. Individual parameters will also be categorised using cut-points identified from published studies.<sup>87</sup>

#### 9.6.4 Left Atrial Size and Function

Left atrial (LA) size will be measured in the anteroposterior (parasternal long-axis), transverse and longitudinal dimensions (apical 4-chamber). LA volumes will be calculated using the biplane area-length method:  $(0.85 \times 4\text{-chamber LA area} \times 2\text{-chamber LA area}) / \text{LA length}$ . The length is measured from the middle of the plane of the mitral annulus to the superior aspect of the LA (shortest of 4- and 2-chamber measurements). LA volumes will be indexed for body surface area.

Where suitable datasets are obtained, 3D LA volumetric analysis and assessment of LA function and strain will also be performed.

#### 9.6.5 Additional Echocardiography Parameters

The following parameters will be obtained in all participants:

- Tricuspid annular plane systolic excursion (TAPSE) for estimation of right ventricular function using pulse-wave Doppler.
- Where applicable, mitral regurgitation dP/dt.

### 9.7 Laboratory Evaluations

The use of biomarkers that can affect treatment decisions in AF is at an early stage of development.<sup>88</sup> The RATE-AF trial will allow us to collect and store blood samples on patients at baseline and follow-up, providing a unique biobank of AF patients receiving rate-control. In collaboration with the Human Biomaterials Resource Centre (HBRC) at the University of Birmingham, we will also isolate DNA for future work on predictors of response, including known polymorphisms of rate-responsiveness.<sup>89</sup>

Laboratories at each clinical site will process the standard laboratory investigations required as part of standard clinical care (see **Section 9.1**). Trial laboratory evaluations will be performed at the core laboratory and processed according to the guidelines in **Sections 9.7.1, 9.7.2 and 9.7.3**.

### 9.7.1 Laboratory Assays

NT-pro B-type natriuretic peptide will be analysed using a Sandwich immunoassay using monoclonal ruthenium labelled antibody and Roche Cobas 8000 e602. The total coefficient of variation for repeatability with this assay is <2% with an estimated volume of 250 microlitres required for each test and measurement range of 5-35000 pg/mL (0.6-4130 pmol/L).

### 9.7.2 Cellular Response to Rate Control

The effect of baseline and follow-up serum on intracellular sodium/calcium, force of contraction and activation of ERK1/2-dependent cascades will be examined in human induced pluripotent stem cell-derived cardiomyocytes, using well-established integrated fluorescence/contractility photometry and western blotting techniques.<sup>90, 91</sup> DigiFAB<sup>92</sup>, will be used to determine whether changes are dependent on endogenous cardiotoxic steroids, which can modulate intracellular ion concentration in cardiomyocytes<sup>93, 94</sup>, and potentially contribute to treatment discontinuation (or the development of toxicity).<sup>95</sup> The concentration of serum cardiotoxic steroids will be determined using liquid chromatography–tandem mass spectrometry. Individual change in cardiotoxic steroids and intracellular sodium/calcium will be correlated with the change in heart rate, LVEF, B-type natriuretic peptide and quality of life. In addition, we will identify patterns in patients withdrawing from treatment or experiencing adverse reactions.

### 9.7.3 Stored Blood Samples

Blood samples will be stored at HBRC for future biomarker and genetic analysis, with participants providing explicit consent for this process. Any future use of these samples will be undertaken with ethical approval.

### 9.7.4 Specimen Preparation, Handling, Storage and Shipment

Specimens will be handled according to local standard operating procedures consisting of the time requirements for processing, required temperatures, aliquots of specimens, where they will be stored, how they will be labelled, the process for remnant samples/disposal and appropriate instructions for transportation.

## 9.8 Economic Evaluation

The RATE-AF trial will allow determination of the most appropriate data collection methods and ease of acquiring resource use and cost data for a subsequent outcomes trial. Specifically, how data is obtained from secondary care records, patient-reported resource use and the feasibility of obtaining primary care records. A preliminary economic evaluation from an NHS perspective will be performed to estimate costs over the 12-month period. The patient-level cost-analysis will determine all AF-related costs, with respect to trial interventions and secondary-care resource use (including adverse events) in the two arms of the trial. We will collect both cost and outcome data and present them in a cost-consequence analysis. Costing for this trial suggests that simplifying medication alone could result in a saving of £5900 over each 12-month period.

1  
2  
3 Considering the high and increasing prevalence of AF, this could result in a substantial NHS cost  
4 savings, particularly if adverse reactions are also reduced. The aim of this objective within the  
5 trial is to prepare the groundwork for a future cost-per-quality adjusted life year (QALY) analysis  
6 of rate-control in AF.  
7

8  
9  
10 Costs of care will be derived from patient level resource-use data, focusing on secondary care  
11 costs, and including adverse effects, such as pacemaker implantation. Other major drivers of  
12 cost are hospitalisation (including visits to Accident & Emergency), unplanned outpatient visits  
13 and outpatient tests such as echocardiography or ambulatory ECG. The cost analysis will also  
14 consider therapy costs, both trial drug and additional treatments. Unit costs will be obtained from  
15 standard sources including NHS Reference Costs, Unit Costs of Health and Social Care<sup>96</sup> and  
16 health care providers. Total per-patient health care costs will initially be calculated thus allowing  
17 the estimation of mean costs per trial arm over 12 months follow-up. Responses to the EQ-5D-  
18 5L questionnaire at baseline, visit 2 (6 months) and visit 3 (12 months) will be used to plan a  
19 future QALY analysis.  
20  
21  
22

23  
24  
25 Key feasibility elements are:

- 26 • Determining the best methods for obtaining hospitalisation data, including where  
27 participants have been hospitalised outside of research site
- 28 • Whether robust primary care costs can be estimated and the method(s) for acquiring this  
29 type of data
- 30 • How key cost drivers can be incorporated into data collection for any future trial  
31  
32  
33  
34  
35  
36  
37  
38  
39  
40  
41  
42  
43  
44  
45  
46  
47  
48  
49  
50  
51  
52  
53  
54  
55  
56  
57  
58  
59  
60

## 10 Pharmacovigilance

Definitions of different types of AE are listed in **Table 2**. The Investigator should assess the seriousness and causality (relatedness) of AEs experienced by the participant (this should be documented in the source data). For further information please refer to **Section 10.1**.

**Table 2: Standard AE Definitions**

| Term                                                                                                      | Definition                                                                                                                                                                                                                                                                                                                                                                                                              |
|-----------------------------------------------------------------------------------------------------------|-------------------------------------------------------------------------------------------------------------------------------------------------------------------------------------------------------------------------------------------------------------------------------------------------------------------------------------------------------------------------------------------------------------------------|
| <b>Adverse Event (AE)</b>                                                                                 | Any untoward medical occurrence in a patient or clinical trial participant administered a medicinal product and which does not necessarily have a causal relationship with this treatment                                                                                                                                                                                                                               |
| <b>Adverse Reaction (AR)</b>                                                                              | Any untoward and unintended response in a participant to an investigational medicinal product which is related to any dose administered to that participant                                                                                                                                                                                                                                                             |
| <b>Serious adverse event (SAE), serious adverse reaction (SAR) or unexpected serious adverse reaction</b> | Any adverse event, adverse reaction or unexpected adverse reaction, respectively, that: <ul style="list-style-type: none"> <li>• results in death;</li> <li>• is life-threatening;</li> <li>• requires hospitalisation or prolongation of existing hospitalisation;</li> <li>• results in persistent or significant disability or incapacity; or</li> <li>• consists of a congenital anomaly or birth defect</li> </ul> |
| <b>Unexpected Adverse Reaction</b>                                                                        | An adverse reaction the nature and severity of which is not consistent with the information about the medicinal product in question set out: <p>(a) in the case of a product with a marketing authorisation, in the summary of product characteristics for that product;</p> <p>(b) in the case of any other investigational medicinal product, in the investigator's brochure relating to the trial in question.</p>   |
| <b>SUSAR</b>                                                                                              | Suspected Unexpected Serious Adverse Reaction                                                                                                                                                                                                                                                                                                                                                                           |

### 10.1 Recording and Assessment of Adverse Events

All adverse events will be reportable to the **RATE-AF** Trial Office up to 30 days post last IMP administration. Any SUSAR related to the IMP should to be reported irrespective of how long after IMP administration the reaction has occurred.

Adverse events will be recorded in the medical records and CRFs. Most AE/ARs that occur in this trial, whether they are serious or not, will be 'expected' treatment-related toxicities due to the drugs used in this trial.



Refer to **Table 3** for definition of expectedness.

**Table 3: Expectedness**

| Category          | Definition                                                                                                                                                                                                         |
|-------------------|--------------------------------------------------------------------------------------------------------------------------------------------------------------------------------------------------------------------|
| <b>Expected</b>   | An adverse event that is classed in nature as serious and which is consistent with the information about the IMP listed in the Investigator Brochure (or SmPC if Licensed IMP) or clearly defined in this protocol |
| <b>Unexpected</b> | An adverse event that is classed in nature as serious and which is not consistent with the information about the IMP listed in the Investigator Brochure (or SmPC if Licensed IMP)                                 |

Adverse events will be recorded with clinical symptoms and accompanied with a simple, brief description of the event, including dates as appropriate.

The assessment of relationship of adverse events to the administration of IMP is a clinical decision based on all available information at the time. The following categories as outlined in **Table 4** will be used to define the causality of the adverse event.

**Table 4: Categorisation of Causality**

| Category           | Definition                                                                                                                                                                                                                                                                                           |
|--------------------|------------------------------------------------------------------------------------------------------------------------------------------------------------------------------------------------------------------------------------------------------------------------------------------------------|
| <b>Definitely</b>  | There is clear evidence to suggest a causal relationship, and other possible contributing factors can be ruled out                                                                                                                                                                                   |
| <b>Probably</b>    | There is evidence to suggest a causal relationship, and the influence of other factors is unlikely                                                                                                                                                                                                   |
| <b>Possibly</b>    | There is some evidence to suggest a causal relationship (e.g. the event occurred within a reasonable time after administration of the trial medication). However, the influence of other factors may have contributed to the event (e.g. the patient's clinical condition, other concomitant events) |
| <b>Unlikely</b>    | There is little evidence to suggest there is a causal relationship (e.g. the event did not occur within a reasonable time after administration of the trial medication). There is another reasonable explanation for the event (e.g. the patient's clinical condition, other concomitant treatments) |
| <b>Not related</b> | There is no evidence of any causal relationship                                                                                                                                                                                                                                                      |

The relevant SmPC for Digoxin and Bisoprolol (which will be dependent on which generic is being used according to local practice at each site) should be filed in the site file by the local research team.

1  
2  
3 The **RATE-AF** Trial protocol and the reference safety information will be used to assess disease  
4 related and/or expected events related to the trial treatment.  
5  
6

## 7 **10.2 Non-Serious Adverse Events/ Adverse Reactions**

8  
9 *Refer to Table 2 for definitions*  
10  
11

12  
13 Common adverse reactions (see Section 7.4) will be recorded on the relevant CRF and sent to  
14 the **RATE-AF** Trial Office.  
15  
16

## 17 **10.3 Serious Adverse Events**

18  
19 *Refer to Table 2 for definitions*  
20  
21

22  
23 All Serious Adverse Events (SAEs), that are not excluded from expedited reporting will be  
24 recorded in the hospital notes and should be reported to the **RATE-AF** Trial Office on a SAE  
25 Form. The completed form should be **faxed to the RATE-AF Trial Office on 0121 415 9135 or**  
26 **0121 415 9136**, as soon as possible and ideally within one working day of becoming aware of the  
27 event. The site Investigator should be able to respond to any related queries raised by the  
28 **RATE-AF** Trial Office as soon as possible.  
29  
30  
31

### 32 **10.3.1 Expected SAEs NOT to be Reported on a SAE Form**

33  
34 Expected SAEs are those listed in the current SmPC for the trial IMPs and can be excluded from  
35 the expedited reporting outlined in **Section 10.1**, for example if they are expected to occur on a  
36 regular basis and offer no further new information to the safety profile. These events should  
37 continue to be recorded in the source data and relevant CRFs.  
38  
39  
40  
41

42 In addition, events **NOT** considered to be SAEs are hospitalisations for:

- 43 • Routine treatment or monitoring of the studied indication, not associated with any  
44 deterioration in condition
  - 45 • Treatment, which was elective or pre-planned, for a pre-existing condition that is unrelated  
46 to the indication under trial, and has not worsened
- 47  
48  
49  
50

51 **Note:** Death from any cause should be reported on an SAE Form and returned to the **RATE-AF**  
52 Trial Office.  
53  
54

## 55 **10.4 SUSARs**

56  
57 *Refer to Table 2 for definitions*  
58  
59

60 SAEs classed by as both suspected to be related to the trial IMP and unexpected are categorised  
as SUSARs, and are always subject to expedited reporting. An SAE Form should be completed,

1  
2  
3 and faxed to the RATE-AF Trial Office within 24 hours of the research staff at site becoming  
4 aware of the event. The local investigator will provide the causality assessment.  
5  
6

7 The Chief Investigator (or nominated individual) will undertake urgent review of all such SAEs  
8 and may request further information immediately from the clinical team at site. The Chief  
9 Investigator will not overrule the causality or seriousness assessment given by the local  
10 investigator but may add additional comment on these. The Chief Investigator will provide the  
11 determination of expectedness according to the reference safety information.  
12  
13

14  
15 SUSARs will be notified to the MHRA and REC by the RATE-AF Trial Office. SUSARs that are  
16 fatal or life-threatening will be notified to the MHRA and REC within 7 days after the RATE-AF  
17 Trial Office has been notified. Other SUSARs will be reported to the REC and MHRA within 15  
18 days after the Trial Office has been notified.  
19  
20  
21

## 22 **10.5 Development Safety Update Reports**

23  
24  
25 The RATE-AF Trial Office will provide the MHRA with Development Safety Update Reports  
26 (DSURs). The reports will be submitted within 60 days of the Developmental International Birth  
27 Date (DIBD) of the trial each year until the trial is declared ended.  
28  
29  
30

## 31 **10.6 Annual Progress Reports**

32  
33 An annual progress report will be submitted to the REC within 30 days of the anniversary date on  
34 which the favourable opinion was given, and annually until the trial is declared ended.  
35  
36  
37

## 38 **10.7 Pregnancy**

39  
40 Due to the age of participants that will be randomised into the RATE-AF Trial ( $\geq 60$  years), it is  
41 highly improbable that female participants will be pregnant at the time of randomisation, or  
42 become pregnant during the trial. Any pregnancies will be followed up for outcome; any outcome  
43 meeting the definition of an SAE will be reported to the RATE-AF Trial Office on the relevant  
44 CRF.  
45  
46  
47  
48

## 49 **10.8 Reporting Urgent Safety Measures**

50  
51  
52 If any urgent safety measures are taken the Principal Investigator/BCTU/Sponsor shall  
53 immediately and in any event no later than 3 days from the date the measures are taken, give  
54 written notice to the MHRA and the REC of the measures taken and the circumstances giving rise  
55 to those measures.  
56  
57  
58  
59  
60

## 11 Quality Control and Quality Assurance

### 11.1 Site Set-Up and Initiation

All participating Principal Investigators will be asked to sign the necessary agreements and supply a current CV to the Trials Office. All members of the site research team will also be required to sign a site signature and delegation log. Prior to commencing recruitment all sites will undergo a process of initiation and will have completed GCP training. Key members of the site research team will be required to attend either a meeting or a teleconference covering aspects of the trial design, protocol procedures, Adverse Event reporting, collection and reporting of data and record keeping. Sites will be provided with an Investigator Site File containing essential documentation, instructions, and other documentation required for the conduct of the trial. The Trials Office must be informed immediately of any change in the site research team.

### 11.2 Central Monitoring

Monitoring of this trial will be to ensure compliance with Good Clinical Practice. A risk proportionate approach to the initiation, management and monitoring of the trial will be adopted (as per the MRC/DH/MHRA Joint Project: Risk-adapted Approaches to the Management of Clinical Trials of Investigational Medicinal Products) and outlined in the trial-specific risk assessment.

The Trials Office will be in regular contact with the site research team to check on progress and address any queries that they may have. The Trials Office will check incoming CRFs for compliance with the protocol, data consistency, missing data and timing. Sites will be asked for missing data or clarification of inconsistencies or discrepancies. Sites will be requested to send in copies of signed Informed Consent Forms and other documentation for in-house review for all participants providing explicit consent.

Additional on-site monitoring visits may be triggered, for example by poor CRF return, poor data quality, low SAE reporting rates, excessive number of participant withdrawals or deviations. This will be detailed in the monitoring plan. If a monitoring visit is required the Trials Office will contact the site to arrange a date for the proposed visit and will provide the site with written confirmation. Investigators will allow the **RATE-AF** trial staff access to source documents as requested.

### 11.3 Audit and Inspection

The Principal Investigator will permit trial-related monitoring, quality checks, audits, ethical reviews, and regulatory inspection(s) at their site, providing direct access to source data/documents. The Principal Investigator will comply with these visits and any required follow up. Sites are also requested to notify the Trials Office of any MHRA inspections.

## 11.4 Notification of Serious Breaches

In accordance with Regulation 29A of the Medicines for Human Use (Clinical Trials) Regulations 2004 and its amendments the Sponsor of the trial is responsible for notifying the licensing authority in writing of any serious breach of the conditions and principles of GCP in connection with that trial or the protocol relating to that trial, within 7 days of becoming aware of that breach.

For the purposes of this regulation, a “serious breach” is a breach which is likely to effect to a significant degree the safety or physical or mental integrity of the participants of the trial; or the scientific value of the trial. Sites are therefore requested to notify the Trials office of any suspected trial-related serious breach of GCP and/or the trial protocol. Where the Trials Office is investigating whether or not a serious breach has occurred sites are also requested to cooperate with the Trials Office in providing sufficient information to report the breach to the MHRA where required and in undertaking any corrective and/or preventive action. Sites may be suspended from further recruitment in the event of serious and persistent non-compliance with the protocol and/or GCP, and/or poor recruitment. Any major problems identified during monitoring may be reported to Trial Management Group and Trial Oversight Committee, the REC and the relevant regulatory bodies. This includes reporting serious breaches of GCP and/or the trial protocol to the REC and MHRA. A copy is sent to the University of Birmingham Clinical Research Compliance Team at the time of reporting to the REC and/or relevant regulatory bodies.

## 11.5 Data Handling and Analysis

Paper CRFs must be completed, signed/ dated and either entered directly online or returned to the **RATE-AF** Trial Office by the PI or an authorised member of the site research team (as delegated on the **RATE-AF** Trial Signature and Delegation Log) within the timeframe listed in **Table 5**. Copies of all completed CRFs should be filed in the site file. Entries on paper CRFs should be made in ballpoint pen, in black ink, and must be legible. Any errors should be crossed out with a single stroke, the correction inserted and the change initialled and dated. If it is not obvious why a change has been made, an explanation should be written next to the change.

CRFs can be entered online at <http://www.bctu.bham.ac.uk/RATEAF>. Authorised staff at sites will require an individual secure login username and password to access this online data entry system.

Data reported on each CRF should be consistent with the source data or the discrepancies should be explained. If information is not known, this must be clearly indicated on the CRF. All missing and ambiguous data will be queried. All sections are to be completed.

CRF versions may be updated by the **RATE-AF** Trial Office, as appropriate, throughout the duration of the trial. Whilst this will not constitute a protocol amendment, new versions of the CRFs must be implemented by participating sites immediately on receipt.

It will be the responsibility of the Principal Investigator to ensure the accuracy of all data entered in the CRFs. The **RATE-AF** Trial Signature & Delegation Log will identify all those personnel with responsibilities for data collection.

Access to data, including the final trial dataset, will be limited to members of the Research Team.

The investigator(s)/institution(s) will permit trial-related monitoring, audits, REC review, and regulatory inspection(s), providing direct access to source data/documents. Trial participants are informed of this during the informed consent discussion and will consent to provide access to their medical notes.

**Table 5: Data Collection Forms**

| Form Name                   | Schedule for submission                                              |
|-----------------------------|----------------------------------------------------------------------|
| Randomisation Form          | Collected at randomisation                                           |
| Baseline and Follow-Up CRFs | As soon as possible after each follow-up assessment time point       |
| Serious Adverse Event Form  | Faxed within 24hrs of research staff at site becoming aware of event |

### 11.6 End of Trial

The end of trial will be 30 days after the last data capture. This will allow sufficient time for the completion of protocol procedures, data collection and data input. The Trials Office will notify the MHRA and REC that the trial has ended within 90 days of the end of trial. Where the trial has terminated early, the Trials Office will inform the MHRA and REC within 15 days of the end of trial. The Trials Office will provide them with a summary of the clinical trial report within 12 months of the end of trial.

A copy of the end of trial notification as well as the summary report is also sent to the University of Birmingham Research Governance Team at the time of sending these are sent to the MHRA and REC.

### 11.7 Archiving

Archiving will be authorised by the BCTU on behalf of the Sponsor following submission of the end of trial report.

Principal Investigators are responsible for the secure archiving of essential trial documents (for their site) as per their NHS Trust policy. All essential documents will be archived for a minimum of 25 years after completion of trial.

Destruction of essential documents will require authorisation from the BCTU on behalf of the Sponsor.

## 12 Statistical Considerations

### 12.1 Outcome measures

#### 12.1.1 Primary Outcome

Patient-reported quality of life (QoL) - SF-36 physical component summary score at six months

#### 12.1.2 Secondary Outcomes

##### Patient-reported QoL:

- SF-36 global and domain-specific scores at 6 and 12 months
- EQ-5D-5L summary index and visual analogue scale at six and twelve months
- AFEQT overall score at six and twelve months

##### Cardiac function:

- Echocardiographic LVEF at 12 months
- Diastolic function (E/e' and composite of diastolic indices) at 12 months
- Functional assessment:
- Six-minute walking distance at 6 and 12 months
- Change in European Heart Rhythm Association (EHRA) class at 6 and 12 months

##### Biomarkers:

- Change in B-type natriuretic peptide (BNP) levels at 6 months
- Change in heart rate using 24-hour ambulatory ECG

#### 12.1.3 Feasibility Outcomes

- Recruitment target of 3 patients per week across all participating centres.
- Compliance and reasons for non-compliance
- Number of withdrawals and losses to follow-up (with reasons)
- Drug discontinuation rate and adverse reactions requiring drug discontinuation.
- Number of patients needing therapy-induced requirement for additional treatment
- Population-specific standard deviations (SD) and proportions

- *SD of SF36 physical functioning score at 6 and 12 months*
- *SD of SF36 overall score at 6 and 12 months*
- *SD of AFEQT overall score at 6 and 12 months*
- *SD of LVEF and E/e' score at 6 and 12 months*
- *Unplanned hospitalisation admissions rates*
- Cardiovascular Events (particularly mortality, thromboembolic events, myocardial infarction and cardiovascular interventions)

The final analyses will follow a pre-specified analysis plan, drafted in conjunction with the Birmingham Clinical Trials Unit and submitted to the steering committee at the penultimate meeting. We intend to perform a primary intention-to-treat analysis, in addition to a per-protocol analysis.

Any additional (exploratory) analyses will be explicitly labelled as such in any subsequent manuscript.

## 12.2 Power Calculations

Randomising 144 patients we can assume an 85% power to detect an effect size of half a standard deviation in a continuous outcome measure of QoL (two-sided alpha of 0.05). A sample size of 160 patients would account for an estimated 10% loss to follow-up (including withdrawal and death prior to 12-month assessment). There is some evidence from existing research to support the notion that the treatment effect could be this large. The mean SF-36 role-physical score from the rate-control arm of the RACE study was 47, with a 17% improvement with rate-control over time.<sup>62</sup> In another study, CCB resulted in 22% improvement in a proprietary symptom-checklist, compared to a non-significant 8% change in those assigned to beta-blockers (SD 10-points in both groups). These values are also consistent with a 17% improvement in SF-36 scores in a third trial, PIAF.<sup>63</sup> Thus whilst it is possible that this trial may provide a clear indication of effect, it is accepted that the trial will be underpowered to detect smaller differences, reinforcing the requirement for a larger definitive trial which would also be powered to assess impact on clinical event rates.

## 12.3 Statistical analysis

A separate Statistical Analysis Plan for the RATE-AF trial provides a detailed description of the planned statistical analyses. A brief outline of these analyses is given below.

The primary comparison groups will be composed of those who are randomised to digoxin group and those randomised to the beta-blockers group. All analyses will be based on the intention to treat principle, with all patients analysed in the arms to which they were allocated irrespective of compliance with the randomised allocated treatment, and all patients will be included in the analyses. We will, as a sensitivity analysis, conduct per-protocol analyses, where appropriate.



1  
2  
3 For all analyses, a p-value <0.05 will be considered statistically significant.  
4  
5

### 6 **12.3.1 Primary outcome analysis**

7  
8 The primary outcome for this trial is the continuous SF36 physical functioning domain score at 6  
9 months. This outcome will be analysed using an ANCOVA model adjusting for treatment arm,  
10 baseline score and all minimisation variables. Results will be presented as difference in means  
11 and 95% confidence intervals.  
12  
13

### 14 **12.3.2 Feasibility and Secondary outcomes analysis**

15  
16 The feasibility and secondary outcomes for the trial comprise of a combination of both continuous  
17 and categorical (dichotomous) data items.  
18  
19

#### 20 **Categorical endpoints:**

21  
22 For outcomes which are categorical (dichotomous) in nature, the proportion of participants and  
23 percentages will be analysed between arms.  
24  
25

26  
27 Logistic/Log-binomial regression models will be fitted (where appropriate) to adjust for treatment  
28 arm, baseline scores and all minimisation variables.  
29  
30

31  
32 Results will be presented as odds ratios/relative risks and 95% confidence intervals.  
33  
34

#### 35 **Continuous endpoints:**

36  
37 Any outcomes that are continuous in nature will be analysed in the same way as the primary  
38 outcome.  
39  
40

### 41 **12.3.3 Missing data and sensitivity analyses**

42  
43 Primary analysis will concentrate on available data only, with no attempt made to impute missing  
44 data. Where appropriate, sensitivity analyses will be carried out to examine the possible impact  
45 of missing data on the results (full details will be discussed within the Statistical Analysis Plan).  
46  
47  
48  
49

### 50 **12.3.4 Interim analyses and Stopping rules**

51  
52 Analysis of the data with respect to efficacy and safety will be performed at 12 months and sent  
53 to Data Monitoring Committee (DMC); see **Section 16**. The DMC will outline and agree the  
54 stopping rules for the trial which will be documented in the DMC charter. It is likely that the  
55 Haybittle-Peto boundary will be used. This states that if an interim analysis shows a probability of  
56 less than 0.001 that the treatments are different, then the trial should be stopped early. This will  
57 be used alongside data on important secondary endpoints and all other relevant evidence. A  
58 DMC report and charter outlining the terms of reference (including information on stopping rules)  
59 will be agreed with the DMEC.  
60

## 12.4 Final analysis

The final analysis for the RATE-AF trial will occur once the last randomised participant completes their 12-month follow-up.

## 13 Ethics and Regulatory Requirements

The trial will be performed in accordance with the recommendations guiding physicians in biomedical research involving human participants, adopted by the 18<sup>th</sup> World Medical Association General Assembly, Helsinki, Finland, June 1964, amended at the 48<sup>th</sup> World Medical Association General Assembly, Somerset West, Republic of South Africa, October 1996 (website: <http://www.wma.net/en/30publications/10policies/b3/index.html>).

The trial will be conducted in accordance with the Research Governance Framework for Health and Social Care, the applicable UK Statutory Instruments, (which include the Medicines for Human Use Clinical Trials 2004 and subsequent amendments and the Data Protection Act 1998 and Human Tissue Act 2008, EU Clinical Trials Directive and amendment Regulations as appropriate) and Guidelines for Good Clinical Practice (GCP). This trial will be carried out under a Clinical Trial Authorisation in accordance with the Medicines for Human Use Clinical Trials regulations. The protocol will be submitted to and approved by the REC prior to circulation.

Before any participants are enrolled into the trial, the Principal Investigator at each site is required to obtain local R&D approval. Sites will not be permitted to enrol participants until written confirmation of R&D approval is received by the Principal Investigator.

It is the responsibility of the Principal Investigator to ensure that all subsequent amendments gain the necessary local approval. This does not affect the individual clinicians' responsibility to take immediate action if thought necessary to protect the health and interest of individual participants.

Within 90 days after the end of the trial, the Chief Investigator/Sponsor will ensure that the REC and the MHRA are notified that the trial has finished. If the trial is terminated prematurely, those reports will be made within 15 days after the end of the trial. The Chief Investigator will provide the Sponsor with a summary report of the clinical trial, which will then be submitted to the MHRA and REC within one year after the end of the trial.

## 14 Oversight Committees

### 14.1 Trial Management Group

The Trial Management Group (TMG) will comprise the CI, other lead investigators (clinical and non-clinical) and members of the BCTU. The TMG will be responsible for the day-to-day running and management of **RATE-AF**. The TMG will convene at regular intervals.

## 14.2 Trial Oversight Committee

A joint oversight committee comprising a Trial Steering Committee (TSC) and Data Monitoring Committee (DMC) will be engaged for this trial.

The role of the TSC is to provide the overall supervision of the trial. The TSC will monitor trial progress and conduct and advice on scientific credibility. The TSC will consider and act, as appropriate, upon the recommendations of the Data Monitoring Committee. Further details of the remit and role of the TSC are available in the TSC Charter.

An independent DMC will be established to oversee the safety of participants in the trial. The DMC will meet prior to the trial opening to enrolment, and then meet at least annually, or as per a timetable agreed by the DMC prior to trial commencement. Data analyses will be supplied in confidence to the DMC, which will be asked to give advice on whether the accumulated data from the trial, together with the results from other relevant research, justifies the continuing recruitment of further participants. The DMC will operate in accordance with the trial specific charter.

## 14.3 Protocol amendments

Where important protocol modifications are required as a result of oversight (for example, changes to eligibility criteria, outcomes or analyses), this information will be communicated to relevant parties, such as investigators, the REC, trial registries and regulators.

## 15 Finance

The RATE-AF Trial is funded through a Career Development Fellowship awarded to the Chief Investigator by the National Institute for Health Research (NIHR).

## 16 Confidentiality and Data Protection

Personal data recorded on all documents will be regarded as strictly confidential and will be handled and stored in accordance with the Data Protection Act 1998.

Participants will be identified using their unique trial identification number, date of birth and hospital number on the CRFs. and correspondence between the Trials Office and the participating site. Participants will give their explicit consent for the movement of their consent form, giving permission for the Trials Office to be sent a copy. This will be used to perform in-house monitoring of the consent process.

The Investigator must maintain documents not for submission to the Trials Office (e.g. Participant Identification Logs) in strict confidence. In the case of specific issues and/or queries from the

regulatory authorities, it will be necessary to have access to the complete trial records, provided that participant confidentiality is protected.

The Trials Office will maintain the confidentiality of all participants' data and will not disclose information by which participants may be identified to any third party other than those directly involved in the treatment of the participant and organisations for which the participant has given explicit consent for data transfer (e.g. competent authority, sponsor). Representatives of the RATE-AF Trials Office and sponsor may be required to have access to participant's notes for quality assurance purposes but participants should be reassured that their confidentiality will be respected at all times.

## 17 Insurance and Indemnity

The University of Birmingham has in place Clinical Trials indemnity coverage for this trial which provides cover to the University for harm which comes about through the University's, or its staff's, negligence in relation to the design or management of the trial and may alternatively, and at the University's discretion provide cover for non-negligent harm to participants.

With respect to the conduct of the trial at the Clinical Site and other clinical care of the patient, responsibility for the care of the patients remains with the NHS organisation responsible for the Clinical Site and is therefore indemnified through the NHS Litigation Authority.

The University of Birmingham is independent of any pharmaceutical company, and as such it is not covered by the Association of the British Pharmaceutical Industry (ABPI) guidelines for participant compensation.

## 18 Dissemination and Publication

Regular newsletters will keep collaborators informed of trial progress and regular meetings will be held to report the progress of the trial and to address any problems encountered in the conduct of the trial. The CI will coordinate dissemination of data from this trial. All publications and presentations, including abstracts, relating to the main trial will be authorised by the RATE-AF TMG. The results of the analysis will be published in the name of the RATE-AF Collaborative Group in a peer reviewed journal (provided that this does not conflict with the journal's policy).

Named authors must satisfy the International Committee of Medical Journal Editors (ICMJE) criteria for authorship (contribute to drafting of the article or revision for important intellectual content), provide timely approval of the final version to be published and supply detailed statements on any potential conflict of interest or financial relationship (<http://www.icmje.org/>). Members of the group who do not fulfil ICMJE criteria for authorship will be listed in the article appendix. Trial participants will be sent a lay summary of the final results of the trial, which will contain a reference to the full paper.

1  
2  
3  
4  
5 **19 Statement of Compliance**  
6

7 The **RATE-AF** trial will be conducted in compliance with the approved protocol, EU GCP and the  
8 applicable regulatory requirements.  
9

10  
11  
12  
13  
14  
15  
16  
17  
18  
19  
20  
21  
22  
23  
24  
25  
26  
27  
28  
29  
30  
31  
32  
33  
34  
35  
36  
37  
38  
39  
40  
41  
42  
43  
44  
45  
46  
47  
48  
49  
50  
51  
52  
53  
54  
55  
56  
57  
58  
59  
60

For peer review only

## 20 References

1. Camm AJ, Kirchhof P, Lip GY, Schotten U, Savelieva I, Ernst S, Van Gelder IC, Al-Attar N, Hindricks G, Prendergast B, Heidbuchel H, Alfieri O, Angelini A, Atar D, Colonna P, De Caterina R, De Sutter J, Goette A, Gorenek B, Heldal M, Hohloser SH, Kolh P, Le Heuzey JY, Ponikowski P, Rutten FH. Guidelines for the management of atrial fibrillation: the Task Force for the Management of Atrial Fibrillation of the European Society of Cardiology (ESC). *Eur Heart J*. 2010;31:2369-2429
2. Anderson JL, Halperin JL, Albert NM, Bozkurt B, Brindis RG, Curtis LH, DeMets D, Guyton RA, Hochman JS, Kovacs RJ, Ohman EM, Pressler SJ, Sellke FW, Shen W-K. Management of patients with atrial fibrillation (Compilation of 2006 ACCF/AHA/ESC and 2011 ACCF/AHA/HRS recommendations). *Circulation*. 2013;127:1916-1926
3. Camm AJ, Lip GY, De Caterina R, Savelieva I, Atar D, Hohnloser SH, Hindricks G, Kirchhof P, E. S. C. Committee for Practice Guidelines. 2012 focused update of the ESC Guidelines for the management of atrial fibrillation: an update of the 2010 ESC Guidelines for the management of atrial fibrillation. Developed with the special contribution of the European Heart Rhythm Association. *Eur Heart J*. 2012;33:2719-2747
4. National Institute for Health and Care Excellence. Atrial fibrillation: the management of atrial fibrillation. *NICE clinical guideline 180*. 2014; Accessed 15/09/2014; <http://www.nice.org.uk/guidance/cg180/>
5. Kotecha D, Holmes J, Krum H, Altman DG, Manzano L, Cleland JG, Lip GY, Coats AJ, Andersson B, Kirchhof P, von Lueder TG, Wedel H, Rosano G, Shibata MC, Rigby A, Flather MD, Beta-Blockers in Heart Failure Collaborative Group. Efficacy of beta blockers in patients with heart failure plus atrial fibrillation: an individual-patient data meta-analysis. *Lancet*. 2014;384:2235-2243
6. Ziff OJ, Lane DA, Samra M, Griffith M, Kirchhof P, Lip GY, Steeds RP, Townend J, Kotecha D. Safety and efficacy of digoxin: systematic review and meta-analysis of observational and controlled trial data. *BMJ*. 2015;351:h4451
7. Kotecha D, Banerjee A, Lip GY. Increased stroke risk in atrial fibrillation patients with heart failure: does ejection fraction matter? *Stroke*. 2015;46:608-609
8. Kotecha D, Kirchhof P. Rate and rhythm control have comparable effects on mortality and stroke in atrial fibrillation but better data are needed. *Evid Based Med*. 2014;19:222-223
9. Kotecha D, Piccini JP. Atrial fibrillation in heart failure: what should we do? *Eur Heart J*. 2015;36:3250-3257
10. Senoo K, Lip GY, Lane DA, Buller HR, Kotecha D. Residual risk of stroke and death in anticoagulated patients according to the type of atrial fibrillation: AMADEUS Trial. *Stroke*. 2015;46:2523-2528
11. Kotecha D, Chudasama R, Lane DA, Kirchhof P, Lip GY. Atrial fibrillation and heart failure due to reduced versus preserved ejection fraction: A systematic review and meta-analysis of death and adverse outcomes. *Int J Cardiol*. 2016;203:660-666
12. Arain M, Campbell MJ, Cooper CL, Lancaster GA. What is a pilot or feasibility study? A review of current practice and editorial policy. *BMC Med Res Methodol*. 2010;10:67
13. Thabane L, Ma J, Chu R, Cheng J, Ismaila A, Rios LP, Robson R, Thabane M, Giangregorio L, Goldsmith CH. A tutorial on pilot studies: the what, why and how. *BMC Med Res Methodol*. 2010;10:1
14. Heeringa J, van der Kuip DAM, Hofman A, Kors JA, van Herpen G, Stricker BHC, Stijnen T, Lip GYH, Witteman JCM. Prevalence, incidence and lifetime risk of atrial fibrillation: the Rotterdam study. *Eur Heart J*. 2006;27:949-953

15. Colilla S, Crow A, Petkun W, Singer DE, Simon T, Liu X. Estimates of Current and Future Incidence and Prevalence of Atrial Fibrillation in the U.S. Adult Population. *Am J Cardiol.* 2013;112:1142-1147
16. Kim MH, Johnston SS, Chu BC, Dalal MR, Schulman KL. Estimation of total incremental health care costs in patients with atrial fibrillation in the United States. *Circ Cardiovasc Qual Outcomes.* 2011;4:313-320
17. Benjamin EJ, Wolf PA, D'Agostino RB, Silbershatz H, Kannel WB, Levy D. Impact of Atrial Fibrillation on the Risk of Death: The Framingham Heart Study. *Circulation.* 1998;98:946-952
18. Stewart S, Hart CL, Hole DJ, McMurray JJV. A population-based study of the long-term risks associated with atrial fibrillation: 20-year follow-up of the Renfrew/Paisley study. *Am J Med.* 2002;113:359-364
19. Marijon E, Le Heuzey JY, Connolly S, Yang S, Pogue J, Brueckmann M, Eikelboom J, Themeles E, Ezekowitz M, Wallentin L, Yusuf S. Causes of death and influencing factors in patients with atrial fibrillation: a competing-risk analysis from the randomized evaluation of long-term anticoagulant therapy study. *Circulation.* 2013;128:2192-2201
20. Chen LY, Sotoodehnia N, Buzkova P, Lopez FL, Yee LM, Heckbert SR, Prineas R, Soliman EZ, Adabag S, Konety S, Folsom AR, Siscovick D, Alonso A. Atrial fibrillation and the risk of sudden cardiac death: the atherosclerosis risk in communities study and cardiovascular health study. *JAMA Intern Med.* 2013;173:29-35
21. Dorian P, Jung W, Newman D, Paquette M, Wood K, Ayers GM, Camm J, Akhtar M, Luderitz B. The impairment of health-related quality of life in patients with intermittent atrial fibrillation: implications for the assessment of investigational therapy. *J Am Coll Cardiol.* 2000;36:1303-1309
22. Thrall G, Lane D, Carroll D, Lip GYH. Quality of Life in Patients with Atrial Fibrillation: A Systematic Review. *Am J Med.* 2006;119:448.e441-419
23. Sears SF, Serber ER, Alvarez LG, Schwartzman DS, Hoyt RH, Ujhelyi MR. Understanding Atrial Symptom Reports: Objective versus Subjective Predictors. *Pacing Clin Electrophysiol.* 2005;28:801-807
24. Dries D, Exner D, Gersh B, Domanski M, Waclawiw M, Stevenson L. Atrial fibrillation is associated with an increased risk for mortality and heart failure progression in patients with asymptomatic and symptomatic left ventricular systolic dysfunction: a retrospective analysis of the SOLVD trials. *J Am Coll Cardiol.* 1998;32:695-703
25. Wang TJ, Larson MG, Levy D, Vasan RS, Leip EP, Wolf PA, D'Agostino RB, Murabito JM, Kannel WB, Benjamin EJ. Temporal Relations of Atrial Fibrillation and Congestive Heart Failure and Their Joint Influence on Mortality: The Framingham Heart Study. *Circulation.* 2003;107:2920-2925
26. The Atrial Fibrillation Follow-up Investigation of Rhythm Management (AFFIRM) Investigators. A Comparison of Rate Control and Rhythm Control in Patients with Atrial Fibrillation. *N Engl J Med.* 2002;347:1825-1833
27. Van Gelder IC, Hagens VE, Bosker HA, Kingma JH, Kamp O, Kingma T, Said SA, Darmanata JI, Timmermans AJM, Tijssen JGP, Crijns HJGM. A Comparison of Rate Control and Rhythm Control in Patients with Recurrent Persistent Atrial Fibrillation. *N Engl J Med.* 2002;347:1834-1840
28. Olshansky B, Rosenfeld LE, Warner AL, Solomon AJ, O'Neill G, Sharma A, Platia E, Feld GK, Akiyama T, Brodsky MA, Greene HL. The Atrial Fibrillation Follow-up Investigation of Rhythm Management (AFFIRM) study: approaches to control rate in atrial fibrillation. *J Am Coll Cardiol.* 2004;43:1201-1208
29. Hohnloser SH, Kuck KH, Lilienthal J. Rhythm or rate control in atrial fibrillation--Pharmacological Intervention in Atrial Fibrillation (PIAF): a randomised trial. *Lancet.* 2000;356:1789-1794

- 1
- 2
- 3 30. Carlsson J, Miketic S, Windeler J, Cuneo A, Haun S, Micus S, Walter S, Tebbe U, Investigators S. Randomized trial of rate-control versus rhythm-control in persistent atrial fibrillation: the Strategies of Treatment of Atrial Fibrillation (STAF) study. *J Am Coll Cardiol.* 2003;41:1690-1696
- 4
- 5
- 6 31. de Denus S, Sanoski CA, Carlsson J, Opolski G, Spinler SA. Rate vs rhythm control in patients with atrial fibrillation: a meta-analysis. *Arch Intern Med.* 2005;165:258-262
- 7
- 8
- 9 32. Chatterjee S, Sardar P, Lichstein E, Mukherjee D, Aikat S. Pharmacologic rate versus rhythm-control strategies in atrial fibrillation: an updated comprehensive review and meta-analysis. *PACE.* 2013;36:122-133
- 10
- 11
- 12
- 13 33. Shelton RJ, Clark AL, Goode K, Rigby AS, Houghton T, Kaye GC, Cleland JG. A randomised, controlled study of rate versus rhythm control in patients with chronic atrial fibrillation and heart failure: (CAFE-II Study). *Heart.* 2009;95:924-930
- 14
- 15
- 16
- 17 34. Roy D, Talajic M, Nattel S, Wyse DG, Dorian P, Lee KL, Bourassa MG, Arnold JMO, Buxton AE, Camm AJ, Connolly SJ, Dubuc M, Ducharme A, Guerra PG, Hohnloser SH, Lambert J, Le Heuzey J-Y, O'Hara G, Pedersen OD, Rouleau J-L, Singh BN, Stevenson LW, Stevenson WG, Thibault B, Waldo AL. Rhythm Control versus Rate Control for Atrial Fibrillation and Heart Failure. *N Engl J Med.* 2008;358:2667-2677
- 18
- 19
- 20
- 21
- 22
- 23 35. Kong MH, Shaw LK, O'Connor C, Califf RM, Blazing MA, Al-Khatib SM. Is rhythm-control superior to rate-control in patients with atrial fibrillation and diastolic heart failure? *Ann Noninvasive Electrocardiol.* 2010;15:209-217
- 24
- 25
- 26
- 27 36. Wazni O, Wilkoff B, Saliba W. Catheter Ablation for Atrial Fibrillation. *N Engl J Med.* 2011;365:2296-2304
- 28
- 29
- 30 37. Jones DG, Haldar SK, Hussain W, Sharma R, Francis DP, Rahman-Haley SL, McDonagh TA, Underwood SR, Markides V, Wong T. A randomized trial to assess catheter ablation versus rate control in the management of persistent atrial fibrillation in heart failure. *J Am Coll Cardiol.* 2013;61:1894-1903
- 31
- 32
- 33
- 34 38. Kirchhof P, Breithardt G, Camm AJ, Crijns HJ, Kuck KH, Vardas P, Wegscheider K. Improving outcomes in patients with atrial fibrillation: rationale and design of the Early treatment of Atrial fibrillation for Stroke prevention Trial. *Am Heart J.* 2013;166:442-448
- 35
- 36
- 37
- 38 39. Steg PG, Alam S, Chiang C-E, Gamra H, Goethals M, Inoue H, Krapf L, Lewalter T, Merioua I, Murin J, Naditch-Brûlé L, Ponikowski P, Rosenqvist M, Silva-Cardoso J, Zharinov O, Brette S, Neill JO. Symptoms, functional status and quality of life in patients with controlled and uncontrolled atrial fibrillation: data from the RealiseAF cross-sectional international registry. *Heart.* 2012;98:195-201
- 39
- 40
- 41
- 42
- 43 40. Nabauer M, Gerth A, Limbourg T, Schneider S, Oeff M, Kirchhof P, Goette A, Lewalter T, Ravens U, Meinertz T, Breithardt G, Steinbeck G. The Registry of the German Competence NETwork on Atrial Fibrillation: patient characteristics and initial management. *Europace.* 2009;11:423-434
- 44
- 45
- 46
- 47 41. Segal JB, McNamara RL, Miller MR, Kim N, Goodman SN, Powe NR, Robinson K, Yu D, Bass EB. The evidence regarding the drugs used for ventricular rate control. *J Fam Practice.* 2000;49:47-59
- 48
- 49
- 50
- 51 42. Farshi R, Kistner D, Sarma JSM, Longmate JA, Singh BN. Ventricular rate control in chronic atrial fibrillation during daily activity and programmed exercise: a crossover open-label study of five drug regimens. *J Am Coll Cardiol.* 1999;33:304-310
- 52
- 53
- 54
- 55 43. Koh KK, Kwon KS, Park HB, Baik SH, Park SJ, Lee KH, Kim EJ, Kim SH, Cho SK, Kim SS. Efficacy and safety of digoxin alone and in combination with low-dose diltiazem or betaxolol to control ventricular rate in chronic atrial fibrillation. *Am J Cardiol.* 1995;75:88-90
- 56
- 57
- 58
- 59 44. Nikolaidou T, Channer KS. Chronic atrial fibrillation: a systematic review of medical heart rate control management. *Postgrad Med J.* 2009;85:303-312
- 60



- 1  
2  
3 45. Ulimoen SR, Enger S, Carlson J, Platonov PG, Pripp AH, Abdelnoor M, Arnesen H, Gjesdal K, Tveit A. Comparison of four single-drug regimens on ventricular rate and arrhythmia-related symptoms in patients with permanent atrial fibrillation. *Am J Cardiol.* 2013;111:225-230
- 4  
5  
6  
7 46. Ulimoen SR, Enger S, Pripp AH, Abdelnoor M, Arnesen H, Gjesdal K, Tveit A. Calcium channel blockers improve exercise capacity and reduce N-terminal Pro-B-type natriuretic peptide levels compared with beta-blockers in patients with permanent atrial fibrillation. *Eur Heart J.* 2014;35:517-524
- 8  
9  
10  
11 47. Khand AU, Rankin AC, Martin W, Taylor J, Gemmell I, Cleland JG. Carvedilol alone or in combination with digoxin for the management of atrial fibrillation in patients with heart failure? *J Am Coll Cardiol.* 2003;42:1944-1951
- 12  
13  
14  
15 48. Vamos M, Erath JW, Hohnloser SH. Digoxin-associated mortality: a systematic review and meta-analysis of the literature. *Eur Heart J.* 2015; In press: 10.1093/eurheartj/ehv143
- 16  
17  
18 49. Gheorghide M, Fonarow GC, van Veldhuisen DJ, Cleland JG, Butler J, Epstein AE, Patel K, Aban IB, Aronow WS, Anker SD, Ahmed A. Lack of evidence of increased mortality among patients with atrial fibrillation taking digoxin: findings from post hoc propensity-matched analysis of the AFFIRM trial. *Eur Heart J.* 2013;34:1489-1497
- 19  
20  
21  
22  
23 50. Friberg L, Hammar N, Rosenqvist M. Digoxin in atrial fibrillation: report from the Stockholm Cohort study of Atrial Fibrillation (SCAF). *Heart.* 2010;96:275-280
- 24  
25  
26 51. Flory JH, Ky B, Haynes K, S MB, Munson J, Rowan C, Strom BL, Hennessy S. Observational cohort study of the safety of digoxin use in women with heart failure. *BMJ Open.* 2012;2:e000888
- 27  
28  
29 52. Andrey JL, Romero S, Garcia-Egido A, Escobar MA, Corzo R, Garcia-Dominguez G, Lechuga V, Gomez F. Mortality and morbidity of heart failure treated with digoxin. A propensity-matched study. *Int J Clin Pract.* 2011;65:1250-1258
- 30  
31  
32  
33 53. Lewis RV, Irvine N, McDevitt DG. Relationships between heart rate, exercise tolerance and cardiac output in atrial fibrillation: the effects of treatment with digoxin, verapamil and diltiazem. *Eur Heart J.* 1988;9:777-781
- 34  
35  
36  
37 54. Tsuneda T, Yamashita T, Fukunami M, Kumagai K, Niwano S, Okumura K, Inoue H. Rate control and quality of life in patients with permanent atrial fibrillation: the Quality of Life and Atrial Fibrillation (QOLAF) Study. *Circ J.* 2006;70:965-970
- 38  
39  
40  
41 55. Van Gelder IC, Groenveld HF, Crijns HJGM, Tuininga YS, Tijssen JGP, Alings AM, Hillege HL, Bergsma-Kadijk JA, Cornel JH, Kamp O, Tukkie R, Bosker HA, Van Veldhuisen DJ, Van den Berg MP. Lenient versus Strict Rate Control in Patients with Atrial Fibrillation. *N Engl J Med.* 2010;362:1363-1373
- 42  
43  
44  
45  
46 56. Groenveld HF, Crijns HJGM, Van den Berg MP, Van Sonderen E, Alings AM, Tijssen JGP, Hillege HL, Tuininga YS, Van Veldhuisen DJ, Ranchor AV, Van Gelder IC. The Effect of Rate Control on Quality of Life in Patients With Permanent Atrial Fibrillation: Data From the RACE II (Rate Control Efficacy in Permanent Atrial Fibrillation II) Study. *J Am Coll Cardiol.* 2011;58:1795-1803
- 47  
48  
49  
50  
51 57. Mulder BA, Van Veldhuisen DJ, Crijns HJGM, Tijssen JGP, Hillege HL, Alings M, Rienstra M, Groenveld HF, Van den Berg MP, Van Gelder IC. Lenient vs. strict rate control in patients with atrial fibrillation and heart failure: a post-hoc analysis of the RACE II study. *Eur J Heart Fail.* 2013;15:1311-1318
- 52  
53  
54  
55  
56 58. Groenveld HF, Tijssen JG, Crijns HJ, Van den Berg MP, Hillege HL, Alings M, Van Veldhuisen DJ, Van Gelder IC. Rate control efficacy in permanent atrial fibrillation: successful and failed strict rate control against a background of lenient rate control: data from RACE II (Rate Control Efficacy in Permanent Atrial Fibrillation). *J Am Coll Cardiol.* 2013;61:741-748
- 57  
58  
59  
60 59. US Department of Health and Human Services Food and Drug Administration. Guidance for industry: patient-reported outcome measures: use in medical product development to support

- 1  
2 labeling claims.  
3 [www.fda.gov/downloads/Drugs/GuidanceComplianceRegulatoryInformation/Guidances/UCM19328](http://www.fda.gov/downloads/Drugs/GuidanceComplianceRegulatoryInformation/Guidances/UCM193282.pdf)  
4 [2.pdf](http://www.fda.gov/downloads/Drugs/GuidanceComplianceRegulatoryInformation/Guidances/UCM193282.pdf). 2009  
5  
6  
7 60. Rienstra M, Lubitz SA, Mahida S, Magnani JW, Fontes JD, Sinner MF, Van Gelder IC, Ellinor PT,  
8 Benjamin EJ. Symptoms and Functional Status of Patients With Atrial Fibrillation: State of the Art  
9 and Future Research Opportunities. *Circulation*. 2012;125:2933-2943  
10  
11 61. Pepine CJ. Effects of pharmacologic therapy on health-related quality of life in elderly patients with  
12 atrial fibrillation: a systematic review of randomized and nonrandomized trials. *Clin Med Insights*  
13 *Cardiol*. 2013;7:1-20  
14  
15 62. Hagens VE, Ranchor AV, Van Sonderen E, Bosker HA, Kamp O, Tijssen JGP, Kingma JH, Crijns  
16 HJGM, Van Gelder IC. Effect of rate or rhythm control on quality of life in persistent atrial fibrillation:  
17 Results from the Rate Control Versus Electrical Cardioversion (RACE) study. *J Am Coll Cardiol*.  
18 2004;43:241-247  
19  
20 63. Grönefeld GC, Lilienthal J, Kuck K-H, Hohnloser SH. Impact of rate versus rhythm control on  
21 quality of life in patients with persistent atrial fibrillation: Results from a prospective randomized  
22 study. *Eur Heart J*. 2003;24:1430-1436  
23  
24 64. Ware Jr JE, Gandek B. Overview of the SF-36 Health Survey and the International Quality of Life  
25 Assessment (IQOLA) Project. *J Clin Epidemiol*. 1998;51:903-912  
26  
27 65. Herdman M, Gudex C, Lloyd A, Janssen M, Kind P, Parkin D, Bonser G, Badia X. Development  
28 and preliminary testing of the new five-level version of EQ-5D (EQ-5D-5L). *Qual Life Res*.  
29 2011;20:1727-1736  
30  
31 66. Devlin NJ, Krabbe PF. The development of new research methods for the valuation of EQ-5D-5L.  
32 *Eur J Health Econ*. 2013;14 Suppl 1:S1-3  
33  
34 67. Spertus J, Dorian P, Bubien R, Lewis S, Godejohn D, Reynolds MR, Lakkireddy DR, Wimmer AP,  
35 Bhandari A, Burk C. Development and validation of the Atrial Fibrillation Effect on QualiTy-of-Life  
36 (AFEQT) Questionnaire in patients with atrial fibrillation. *Circ Arrhythm Electrophysiol*. 2011;4:15-  
37 25  
38  
39 68. Dorian P, Burk C, Mullin CM, Bubien R, Godejohn D, Reynolds MR, Lakkireddy DR, Wimmer AP,  
40 Bhandari A, Spertus J. Interpreting changes in quality of life in atrial fibrillation: How much change  
41 is meaningful? *Am Heart J*. 2013;166:381-387.e388  
42  
43 69. Joint Formulary Committee. *British National Formulary*. London: BMJ Group and Pharmaceutical  
44 Press; 2013.  
45  
46 70. American Hospital Formulary Service. *Drug Information*. Bethesda: American Society of Health-  
47 System Pharmacists; 2013.  
48  
49 71. The Digitalis Investigation Group. The effect of digoxin on mortality and morbidity in patients with  
50 heart failure. *N Engl J Med*. 1997;336:525-533  
51  
52 72. Magnani B, Malini PL. Cardiac glycosides. Drug interactions of clinical significance. *Drug Safety*.  
53 1995;12:97-109  
54  
55 73. Ko DT, Hebert PR, Coffey CS, Sedrakyan A, Curtis JP, Krumholz HM. Beta-blocker therapy and  
56 symptoms of depression, fatigue, and sexual dysfunction. *JAMA*. 2002;288:351-357  
57  
58 74. Terwee C, Mokkink L, Knol D, Ostelo RJG, Bouter L, Vet HW. Rating the methodological quality in  
59 systematic reviews of studies on measurement properties: a scoring system for the COSMIN  
60 checklist. *Qual Life Res*. 2012;21:651-657  
  
75. Streiner DL, Norman GR. *Health measurement scales : a practical guide to their development and  
use*. Oxford ; New York: Oxford University Press; 2008.

- 1  
2  
3 76. Staniszewska S, Haywood KL, Brett J, Tutton L. Patient and public involvement in patient-reported  
4 outcome measures: evolution not revolution. *Patient*. 2012;5:79-87
- 5  
6 77. Calvert M, Kyte D, Duffy H, Gheorghe A, Mercieca-Bebber R, Ives J, Draper H, Brundage M,  
7 Blazeby J, King M. Patient-reported outcome (PRO) assessment in clinical trials: a systematic  
8 review of guidance for trial protocol writers. *PLoS One*. 2014;9:e110216
- 9  
10 78. McCabe PJ, Schumacher K, Barnason SA. Living with atrial fibrillation: a qualitative study. *J*  
11 *Cardiovasc Nurs*. 2011;26:336-344
- 12  
13 79. Kirchhof P, Auricchio A, Bax J, Crijns H, Camm J, Diener H-C, Goette A, Hindricks G, Hohnloser S,  
14 Kappenberger L, Kuck K-H, Lip GYH, Olsson B, Meinertz T, Priori S, Ravens U, Steinbeck G,  
15 Svernhage E, Tijssen J, Vincent A, Breithardt G. Outcome parameters for trials in atrial fibrillation:  
16 Recommendations from a consensus conference organized by the German Atrial Fibrillation  
17 Competence NETwork (AFNET) and the European Heart Rhythm Association (EHRA). *Eur Heart*  
18 *J*. 2007;28:2803-2817
- 19  
20 80. Haywood K, Brett J, Salek S, Marlett N, Penman C, Shklarov S, Norris C, Santana MJ,  
21 Staniszewska S. Patient and public engagement in health-related quality of life and patient-  
22 reported outcomes research: what is important and why should we care? Findings from the first  
23 ISOQOL patient engagement symposium. *Qual Life Res*. 2014: Epub ahead of print; PMID  
24 25194573
- 25  
26 81. Chan AW, Tetzlaff JM, Gotzsche PC, Altman DG, Mann H, Berlin JA, Dickersin K, Hrobjartsson A,  
27 Schulz KF, Parulekar WR, Krleza-Jeric K, Laupacis A, Moher D. SPIRIT 2013 explanation and  
28 elaboration: guidance for protocols of clinical trials. *BMJ*. 2013;346:e7586
- 29  
30 82. Calvert M, Kyte D, von Hildebrand M, King M, Moher D. Putting patients at the heart of health-care  
31 research. *Lancet*. 2015;385:1073-1074
- 32  
33 83. Kyte D, Duffy H, Fletcher B, Gheorghe A, Mercieca-Bebber R, King M, Draper H, Ives J, Brundage  
34 M, Blazeby J, Calvert M. Systematic evaluation of the patient-reported outcome (PRO) content of  
35 clinical trial protocols. *PLoS One*. 2014;9:e110229
- 36  
37 84. Kyte D, Draper H, Calvert M. Patient-reported outcome alerts: ethical and logistical considerations  
38 in clinical trials. *JAMA*. 2013;310:1229-1230
- 39  
40 85. Zbrozek A, Hebert J, Gogates G, Thorell R, Dell C, Molsen E, Craig G, Grice K, Kern S, Hines S.  
41 Validation of electronic systems to collect patient-reported outcome (PRO) data-recommendations  
42 for clinical trial teams: report of the ISPOR ePRO systems validation good research practices task  
43 force. *Value Health*. 2013;16:480-489
- 44  
45 86. Su H-M, Lin T-H, Hsu P-C, Lee W-H, Chu C-Y, Lee C-S, Voon W-C, Lai W-T, Sheu S-H. Global left  
46 ventricular longitudinal systolic strain as a major predictor of cardiovascular events in patients with  
47 atrial fibrillation. *Heart*. 2013;99:1588-1596
- 48  
49 87. Al-Omari MA, Finstuen J, Appleton CP, Barnes ME, Tsang TSM. Echocardiographic assessment of  
50 left ventricular diastolic function and filling pressure in atrial fibrillation. *Am J Cardiol*.  
51 2008;101:1759-1765
- 52  
53 88. Hijazi Z, Oldgren J, Siegbahn A, Granger CB, Wallentin L. Biomarkers in atrial fibrillation: a clinical  
54 review. *Eur Heart J*. 2013;34:1475-1480
- 55  
56 89. Parvez B, Chopra N, Rowan S, Vaglio JC, Muhammad R, Roden DM, Darbar D. A common beta1-  
57 adrenergic receptor polymorphism predicts favorable response to rate-control therapy in atrial  
58 fibrillation. *J Am Coll Cardiol*. 2012;59:49-56
- 59  
60 90. Mahmmoud YA, Shattock M, Cornelius F, Pavlovic D. Inhibition of K<sup>+</sup> transport through Na<sup>+</sup>, K<sup>+</sup>-  
ATPase by capsazepine: role of membrane span 10 of the alpha-subunit in the modulation of ion  
gating. *PLoS One*. 2014;9:e96909

- 1  
2  
3 91. Pavlovic D, Hall AR, Kennington EJ, Aughton K, Boguslavskyi A, Fuller W, Despa S, Bers DM, Shattock MJ. Nitric oxide regulates cardiac intracellular Na(+) and Ca(2)(+) by modulating Na/K ATPase via PKCepsilon and phospholemman-dependent mechanism. *J Mol Cell Cardiol.* 2013;61:164-171  
4  
5  
6  
7  
8 92. Pullen MA, Brooks DP, Edwards RM. Characterization of the neutralizing activity of digoxin-specific Fab toward ouabain-like steroids. *J Pharmacol Exp Ther.* 2004;310:319-325  
9  
10 93. Manunta P, Messaggio E, Casamassima N, Gatti G, Carpini SD, Zagato L, Hamlyn JM. Endogenous ouabain in renal Na(+) handling and related diseases. *Biochim Biophys Acta.* 2010;1802:1214-1218  
11  
12  
13  
14 94. Pavlovic D. The role of cardiotonic steroids in the pathogenesis of cardiomyopathy in chronic kidney disease. *Nephron Clin Pract.* 2014;128:11-21  
15  
16  
17 95. Song H, Karashima E, Hamlyn JM, Blaustein MP. Ouabain-digoxin antagonism in rat arteries and neurones. *J Physiol.* 2014;592:941-969  
18  
19  
20 96. Curtis L. Unit Costs of Health & Social Care 2012. *Personal Social Services Research Unit.* 2012:<http://www.pssru.ac.uk/archive/pdf/uc/uc2012/full-with-covers.pdf>  
21  
22  
23 97. Jerosch-Herold M. Quantification of myocardial perfusion by cardiovascular magnetic resonance. *Journal of Cardiovascular Magnetic Resonance.* 2010;12:57  
24  
25  
26  
27  
28  
29  
30  
31  
32  
33  
34  
35  
36  
37  
38  
39  
40  
41  
42  
43  
44  
45  
46  
47  
48  
49  
50  
51  
52  
53  
54  
55  
56  
57  
58  
59  
60

APPENDIX A – Dosing Schedule (Digoxin)



Randomised treatment arm: Group A



1  
2  
3  
4  
5  
6  
7  
8  
9  
10  
11  
12  
13  
14  
15  
16  
17  
18  
19  
20  
21  
22  
23  
24  
25  
26  
27  
28  
29  
30  
31  
32  
33  
34  
35  
36  
37  
38  
39  
40  
41  
42  
43  
44  
45  
46  
47

APPENDIX B – Dosing Schedule (Bisoprolol)



Randomised treatment arm: Group B

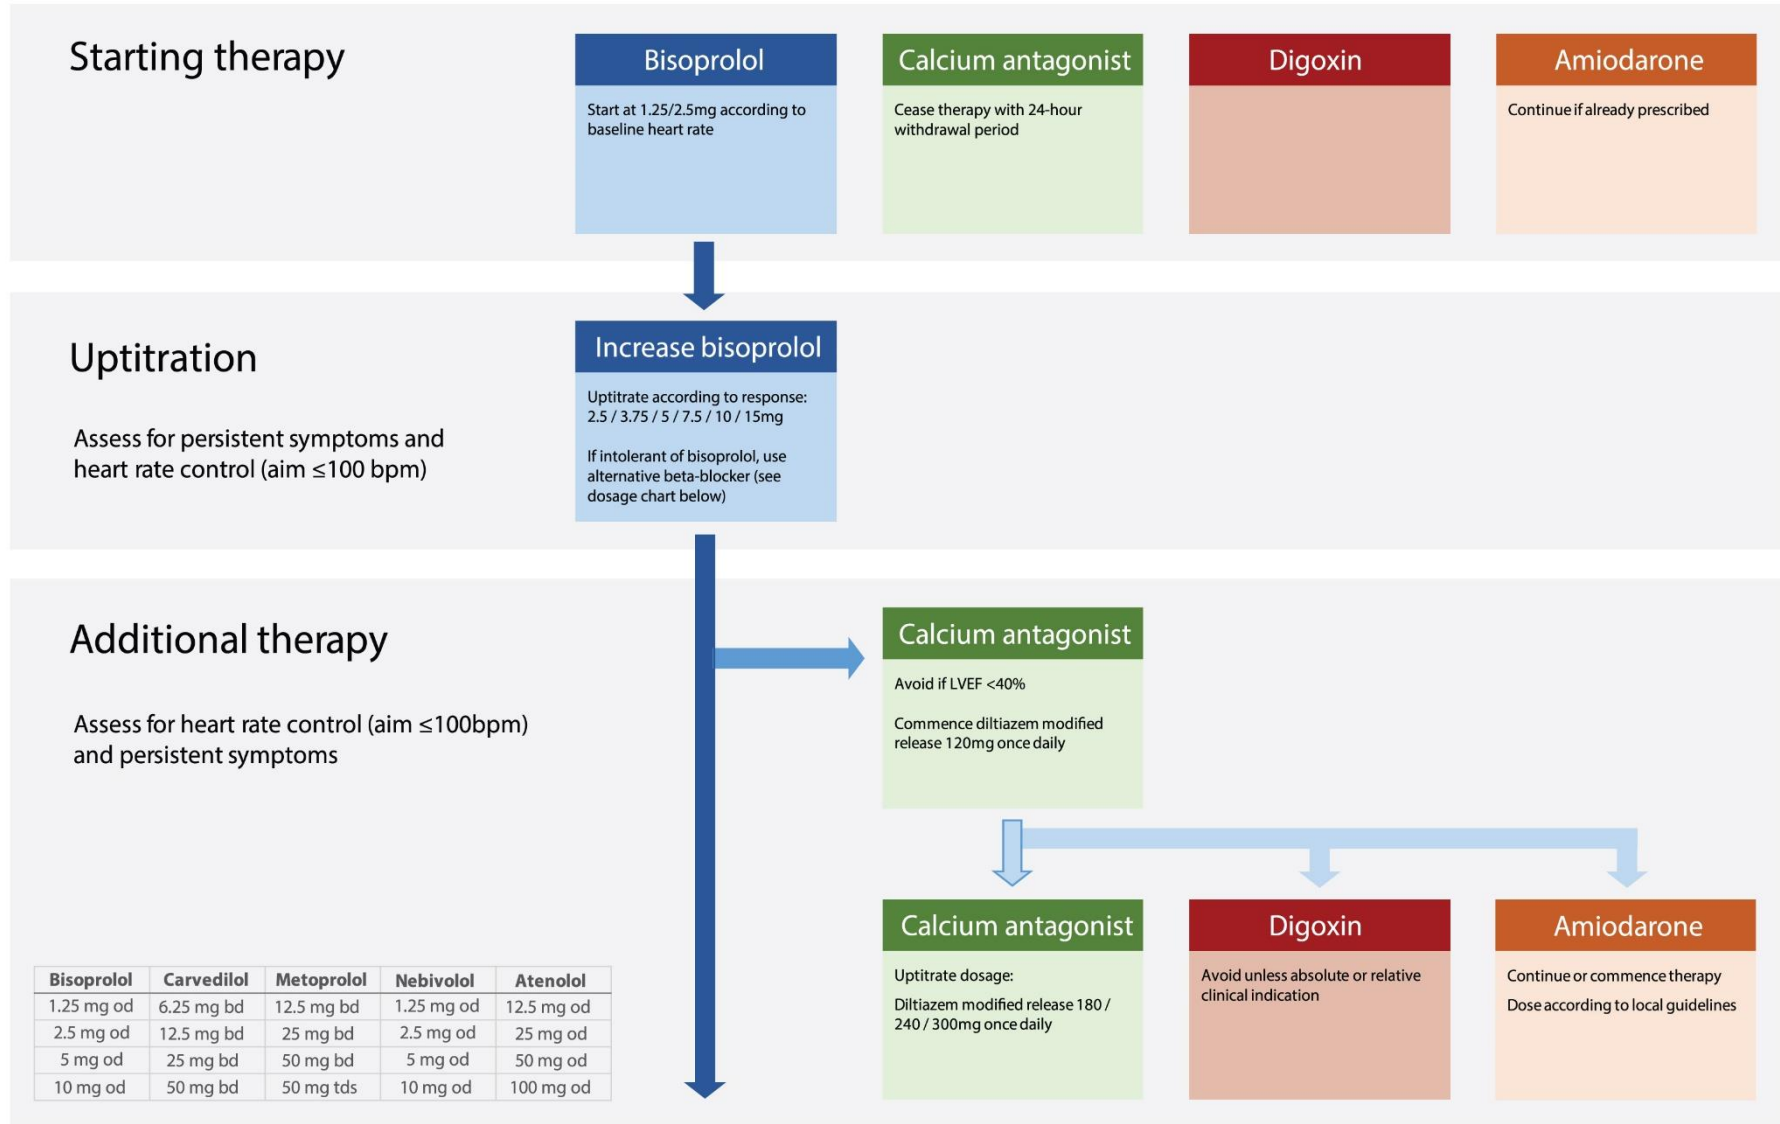

1  
2  
3  
4  
5  
6  
7  
8  
9  
10  
11  
12  
13  
14  
15  
16  
17  
18  
19  
20  
21  
22  
23  
24  
25  
26  
27  
28  
29  
30  
31  
32  
33  
34  
35  
36  
37  
38  
39  
40  
41  
42  
43  
44  
45  
46  
47

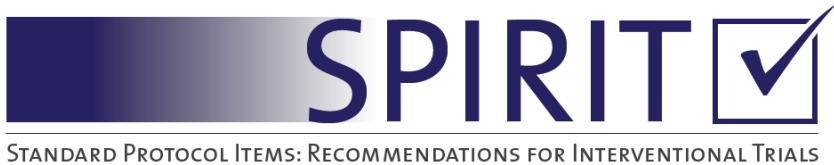

1  
2  
3  
4  
5  
6  
7  
8  
9  
10  
11  
12  
13  
14  
15  
16  
17  
18  
19  
20  
21  
22  
23  
24  
25  
26  
27  
28  
29  
30  
31  
32  
33  
34  
35  
36  
37  
38  
39  
40  
41  
42  
43  
44  
45  
46  
47

SPIRIT 2013 Checklist: Recommended items to address in a clinical trial protocol and related documents\*

| Section/item                      | Item No | Description                                                                                                                                                                                                                                                                              | Addressed on page number |
|-----------------------------------|---------|------------------------------------------------------------------------------------------------------------------------------------------------------------------------------------------------------------------------------------------------------------------------------------------|--------------------------|
| <b>Administrative information</b> |         |                                                                                                                                                                                                                                                                                          |                          |
| Title                             | 1       | Descriptive title identifying the study design, population, interventions, and, if applicable, trial acronym                                                                                                                                                                             | _____                    |
| Trial registration                | 2a      | Trial identifier and registry name. If not yet registered, name of intended registry                                                                                                                                                                                                     | _____                    |
|                                   | 2b      | All items from the World Health Organization Trial Registration Data Set                                                                                                                                                                                                                 | _____                    |
| Protocol version                  | 3       | Date and version identifier                                                                                                                                                                                                                                                              | _____                    |
| Funding                           | 4       | Sources and types of financial, material, and other support                                                                                                                                                                                                                              | _____                    |
| Roles and responsibilities        | 5a      | Names, affiliations, and roles of protocol contributors                                                                                                                                                                                                                                  | _____                    |
|                                   | 5b      | Name and contact information for the trial sponsor                                                                                                                                                                                                                                       | _____                    |
|                                   | 5c      | Role of study sponsor and funders, if any, in study design; collection, management, analysis, and interpretation of data; writing of the report; and the decision to submit the report for publication, including whether they will have ultimate authority over any of these activities | _____                    |
|                                   | 5d      | Composition, roles, and responsibilities of the coordinating centre, steering committee, endpoint adjudication committee, data management team, and other individuals or groups overseeing the trial, if applicable (see Item 21a for data monitoring committee)                         | _____                    |

1 **Introduction**

2

3

4 Background and rationale 6a Description of research question and justification for undertaking the trial, including summary of relevant studies (published and unpublished) examining benefits and harms for each intervention \_\_\_\_\_

5

6

7 6b Explanation for choice of comparators \_\_\_\_\_

8

9 Objectives 7 Specific objectives or hypotheses \_\_\_\_\_

10

11 Trial design 8 Description of trial design including type of trial (eg, parallel group, crossover, factorial, single group), allocation ratio, and framework (eg, superiority, equivalence, noninferiority, exploratory) \_\_\_\_\_

12

13

14

15 **Methods: Participants, interventions, and outcomes**

16

17 Study setting 9 Description of study settings (eg, community clinic, academic hospital) and list of countries where data will be collected. Reference to where list of study sites can be obtained \_\_\_\_\_

18

19

20 Eligibility criteria 10 Inclusion and exclusion criteria for participants. If applicable, eligibility criteria for study centres and individuals who will perform the interventions (eg, surgeons, psychotherapists) \_\_\_\_\_

21

22

23 Interventions 11a Interventions for each group with sufficient detail to allow replication, including how and when they will be administered \_\_\_\_\_

24

25

26 11b Criteria for discontinuing or modifying allocated interventions for a given trial participant (eg, drug dose change in response to harms, participant request, or improving/worsening disease) \_\_\_\_\_

27

28

29 11c Strategies to improve adherence to intervention protocols, and any procedures for monitoring adherence (eg, drug tablet return, laboratory tests) \_\_\_\_\_

30

31

32 11d Relevant concomitant care and interventions that are permitted or prohibited during the trial \_\_\_\_\_

33

34

35 Outcomes 12 Primary, secondary, and other outcomes, including the specific measurement variable (eg, systolic blood pressure), analysis metric (eg, change from baseline, final value, time to event), method of aggregation (eg, median, proportion), and time point for each outcome. Explanation of the clinical relevance of chosen efficacy and harm outcomes is strongly recommended \_\_\_\_\_

36

37

38

39

40

41 Participant timeline 13 Time schedule of enrolment, interventions (including any run-ins and washouts), assessments, and visits for participants. A schematic diagram is highly recommended (see Figure) \_\_\_\_\_

42

43

44

45

46

47



1 Sample size 14 Estimated number of participants needed to achieve study objectives and how it was determined, including \_\_\_\_\_  
 2 clinical and statistical assumptions supporting any sample size calculations

4 Recruitment 15 Strategies for achieving adequate participant enrolment to reach target sample size \_\_\_\_\_

7 **Methods: Assignment of interventions (for controlled trials)**

9 Allocation:

11 Sequence 16a Method of generating the allocation sequence (eg, computer-generated random numbers), and list of any \_\_\_\_\_  
 12 generation factors for stratification. To reduce predictability of a random sequence, details of any planned restriction  
 13 (eg, blocking) should be provided in a separate document that is unavailable to those who enrol participants  
 14 or assign interventions

17 Allocation 16b Mechanism of implementing the allocation sequence (eg, central telephone; sequentially numbered, \_\_\_\_\_  
 18 concealment opaque, sealed envelopes), describing any steps to conceal the sequence until interventions are assigned  
 19 mechanism

21 Implementation 16c Who will generate the allocation sequence, who will enrol participants, and who will assign participants to \_\_\_\_\_  
 22 interventions

25 Blinding (masking) 17a Who will be blinded after assignment to interventions (eg, trial participants, care providers, outcome \_\_\_\_\_  
 26 assessors, data analysts), and how

28 17b If blinded, circumstances under which unblinding is permissible, and procedure for revealing a participant's \_\_\_\_\_  
 29 allocated intervention during the trial

32 **Methods: Data collection, management, and analysis**

34 Data collection 18a Plans for assessment and collection of outcome, baseline, and other trial data, including any related \_\_\_\_\_  
 35 methods processes to promote data quality (eg, duplicate measurements, training of assessors) and a description of  
 36 study instruments (eg, questionnaires, laboratory tests) along with their reliability and validity, if known.  
 37 Reference to where data collection forms can be found, if not in the protocol

40 18b Plans to promote participant retention and complete follow-up, including list of any outcome data to be \_\_\_\_\_  
 41 collected for participants who discontinue or deviate from intervention protocols

|    |                                 |     |                                                                                                              |       |
|----|---------------------------------|-----|--------------------------------------------------------------------------------------------------------------|-------|
| 1  | Data management                 | 19  | Plans for data entry, coding, security, and storage, including any related processes to promote data quality | _____ |
| 2  |                                 |     | (eg, double data entry; range checks for data values). Reference to where details of data management         |       |
| 3  |                                 |     | procedures can be found, if not in the protocol                                                              |       |
| 4  |                                 |     |                                                                                                              |       |
| 5  | Statistical methods             | 20a | Statistical methods for analysing primary and secondary outcomes. Reference to where other details of the    | _____ |
| 6  |                                 |     | statistical analysis plan can be found, if not in the protocol                                               |       |
| 7  |                                 |     |                                                                                                              |       |
| 8  |                                 | 20b | Methods for any additional analyses (eg, subgroup and adjusted analyses)                                     | _____ |
| 9  |                                 |     |                                                                                                              |       |
| 10 |                                 | 20c | Definition of analysis population relating to protocol non-adherence (eg, as randomised analysis), and any   | _____ |
| 11 |                                 |     | statistical methods to handle missing data (eg, multiple imputation)                                         |       |
| 12 |                                 |     |                                                                                                              |       |
| 13 |                                 |     |                                                                                                              |       |
| 14 |                                 |     |                                                                                                              |       |
| 15 | <b>Methods: Monitoring</b>      |     |                                                                                                              |       |
| 16 |                                 |     |                                                                                                              |       |
| 17 | Data monitoring                 | 21a | Composition of data monitoring committee (DMC); summary of its role and reporting structure; statement of    | _____ |
| 18 |                                 |     | whether it is independent from the sponsor and competing interests; and reference to where further details   |       |
| 19 |                                 |     | about its charter can be found, if not in the protocol. Alternatively, an explanation of why a DMC is not    |       |
| 20 |                                 |     | needed                                                                                                       |       |
| 21 |                                 |     |                                                                                                              |       |
| 22 |                                 | 21b | Description of any interim analyses and stopping guidelines, including who will have access to these interim | _____ |
| 23 |                                 |     | results and make the final decision to terminate the trial                                                   |       |
| 24 |                                 |     |                                                                                                              |       |
| 25 |                                 |     |                                                                                                              |       |
| 26 | Harms                           | 22  | Plans for collecting, assessing, reporting, and managing solicited and spontaneously reported adverse        | _____ |
| 27 |                                 |     | events and other unintended effects of trial interventions or trial conduct                                  |       |
| 28 |                                 |     |                                                                                                              |       |
| 29 | Auditing                        | 23  | Frequency and procedures for auditing trial conduct, if any, and whether the process will be independent     | _____ |
| 30 |                                 |     | from investigators and the sponsor                                                                           |       |
| 31 |                                 |     |                                                                                                              |       |
| 32 |                                 |     |                                                                                                              |       |
| 33 | <b>Ethics and dissemination</b> |     |                                                                                                              |       |
| 34 |                                 |     |                                                                                                              |       |
| 35 | Research ethics                 | 24  | Plans for seeking research ethics committee/institutional review board (REC/IRB) approval                    | _____ |
| 36 | approval                        |     |                                                                                                              |       |
| 37 |                                 |     |                                                                                                              |       |
| 38 | Protocol                        | 25  | Plans for communicating important protocol modifications (eg, changes to eligibility criteria, outcomes,     | _____ |
| 39 | amendments                      |     | analyses) to relevant parties (eg, investigators, REC/IRBs, trial participants, trial registries, journals,  |       |
| 40 |                                 |     | regulators)                                                                                                  |       |
| 41 |                                 |     |                                                                                                              |       |
| 42 |                                 |     |                                                                                                              |       |
| 43 |                                 |     |                                                                                                              |       |
| 44 |                                 |     |                                                                                                              |       |
| 45 |                                 |     |                                                                                                              |       |
| 46 |                                 |     |                                                                                                              |       |
| 47 |                                 |     |                                                                                                              |       |

|    |                      |     |                                                                                                                 |       |
|----|----------------------|-----|-----------------------------------------------------------------------------------------------------------------|-------|
| 1  | Consent or assent    | 26a | Who will obtain informed consent or assent from potential trial participants or authorised surrogates, and      | _____ |
| 2  |                      |     | how (see Item 32)                                                                                               |       |
| 3  |                      |     |                                                                                                                 |       |
| 4  |                      | 26b | Additional consent provisions for collection and use of participant data and biological specimens in ancillary  | _____ |
| 5  |                      |     | studies, if applicable                                                                                          |       |
| 6  |                      |     |                                                                                                                 |       |
| 7  | Confidentiality      | 27  | How personal information about potential and enrolled participants will be collected, shared, and maintained    | _____ |
| 8  |                      |     | in order to protect confidentiality before, during, and after the trial                                         |       |
| 9  |                      |     |                                                                                                                 |       |
| 10 | Declaration of       | 28  | Financial and other competing interests for principal investigators for the overall trial and each study site   | _____ |
| 11 | interests            |     |                                                                                                                 |       |
| 12 |                      |     |                                                                                                                 |       |
| 13 |                      |     |                                                                                                                 |       |
| 14 | Access to data       | 29  | Statement of who will have access to the final trial dataset, and disclosure of contractual agreements that     | _____ |
| 15 |                      |     | limit such access for investigators                                                                             |       |
| 16 |                      |     |                                                                                                                 |       |
| 17 | Ancillary and post-  | 30  | Provisions, if any, for ancillary and post-trial care, and for compensation to those who suffer harm from trial | _____ |
| 18 | trial care           |     | participation                                                                                                   |       |
| 19 |                      |     |                                                                                                                 |       |
| 20 | Dissemination policy | 31a | Plans for investigators and sponsor to communicate trial results to participants, healthcare professionals,     | _____ |
| 21 |                      |     | the public, and other relevant groups (eg, via publication, reporting in results databases, or other data       |       |
| 22 |                      |     | sharing arrangements), including any publication restrictions                                                   |       |
| 23 |                      |     |                                                                                                                 |       |
| 24 |                      |     |                                                                                                                 |       |
| 25 |                      | 31b | Authorship eligibility guidelines and any intended use of professional writers                                  | _____ |
| 26 |                      |     |                                                                                                                 |       |
| 27 |                      | 31c | Plans, if any, for granting public access to the full protocol, participant-level dataset, and statistical code | _____ |
| 28 |                      |     |                                                                                                                 |       |
| 29 |                      |     |                                                                                                                 |       |
| 30 | <b>Appendices</b>    |     |                                                                                                                 |       |
| 31 |                      |     |                                                                                                                 |       |
| 32 | Informed consent     | 32  | Model consent form and other related documentation given to participants and authorised surrogates              | _____ |
| 33 | materials            |     |                                                                                                                 |       |
| 34 |                      |     |                                                                                                                 |       |
| 35 | Biological           | 33  | Plans for collection, laboratory evaluation, and storage of biological specimens for genetic or molecular       | _____ |
| 36 | specimens            |     | analysis in the current trial and for future use in ancillary studies, if applicable                            |       |
| 37 |                      |     |                                                                                                                 |       |

38  
39 \*It is strongly recommended that this checklist be read in conjunction with the SPIRIT 2013 Explanation & Elaboration for important clarification on the items.  
40 Amendments to the protocol should be tracked and dated. The SPIRIT checklist is copyrighted by the SPIRIT Group under the Creative Commons  
41 "[Attribution-NonCommercial-NoDerivs 3.0 Unported](https://creativecommons.org/licenses/by-nc-nd/3.0/)" license.  
42  
43  
44
